# Supplementary material
Source: publisher figshare collection journal article supplement (https://acs.figshare.com/ndownloader/files/25756992)
Supplement: Supplementary file 1 [file 25756992]

## Sheet: Proteins
Table S7_Multireport of proteins identified in the rectum section
Checked	Protein FDR Confidence: Combined	Master	Accession	Description	tBlastn results	Exp. q-value: Combined	Contaminant	Sum PEP Score	Coverage [%]	# Peptides	# PSMs	# Unique Peptides	# AAs	MW [kDa]	calc. pI	Score Sequest HT: A Sequest HT	Score Sequest HT: B Sequest HT	Score Sequest HT: C Sequest HT	Score Sequest HT: D Sequest HT	Score Sequest HT: E Sequest HT	Score Sequest HT: F Sequest HT	Score Sequest HT: G Sequest HT	Score Sequest HT: H Sequest HT	Score Sequest HT: I Sequest HT	Score Sequest HT: J Sequest HT	Score Sequest HT: K Sequest HT	Score Sequest HT: L Sequest HT	Score Sequest HT: M Sequest HT	Score Sequest HT: N Sequest HT	Score Sequest HT: O Sequest HT	Score Sequest HT: P Sequest HT	Score Sequest HT: Q Sequest HT	Score Sequest HT: R Sequest HT	Score Sequest HT: S Sequest HT	Score Sequest HT: T Sequest HT	# Peptides (by Search Engine): A Sequest HT	# Peptides (by Search Engine): B Sequest HT	# Peptides (by Search Engine): C Sequest HT	# Peptides (by Search Engine): D Sequest HT	# Peptides (by Search Engine): E Sequest HT	# Peptides (by Search Engine): F Sequest HT	# Peptides (by Search Engine): G Sequest HT	# Peptides (by Search Engine): H Sequest HT	# Peptides (by Search Engine): I Sequest HT	# Peptides (by Search Engine): J Sequest HT	# Peptides (by Search Engine): K Sequest HT	# Peptides (by Search Engine): L Sequest HT	# Peptides (by Search Engine): M Sequest HT	# Peptides (by Search Engine): N Sequest HT
FALSE	High	Master Protein	A0A0P0QA73	(2,3-dihydroxybenzoyl)adenylate synthase OS=Serratia marcescens OX=615 GN=entE PE=4 SV=1		0	FALSE	7.54	2	1	3	1	542	59.7	5.41														3.47						5.79														1
FALSE	High	Master Protein	A0A2G4QN74	(4S)-4-hydroxy-5-phosphonooxypentane-2,3-dione isomerase OS=Serratia marcescens OX=615 GN=lsrG PE=3 SV=1		0.008	FALSE	2.329	12	1	1	1	97	11.3	6.15																				2.62
FALSE	High	Master Protein	A0A088AS00	1,2-dihydroxy-3-keto-5-methylthiopentene dioxygenase OS=Apis mellifera OX=7460 GN=LOC551839 PE=3 SV=1		0	FALSE	7.014	6	1	3	1	185	22.4	6.23											2.97					0			2.41												1
FALSE	High	Master Protein	A0A088A5K3	1,4,5-trisphosphate receptor OS=Apis mellifera OX=7460 PE=4 SV=1		0.004	FALSE	2.824	0	1	2	1	2812	318.3	6.02																			1.89
FALSE	High	Master Protein	A0A2G5S2C4	1,4-alpha-glucan branching enzyme GlgB OS=Serratia marcescens OX=615 GN=glgB PE=3 SV=1		0	FALSE	6.746	3	1	2	1	728	83.6	6.15																				3.65
FALSE	High	Master Protein	A0A093VBW3	10 kDa chaperonin OS=Pectobacterium carotovorum subsp. carotovorum OX=555 GN=groES PE=3 SV=1		0	FALSE	9.527	24	2	5	1	97	10.4	5.5	3.59								5.6								0			0	1								1
FALSE	High	Master Protein	A0A0F6KUH0	10 kDa chaperonin OS=Serratia marcescens OX=615 GN=groES PE=3 SV=1		0	FALSE	11.112	29	2	9	1	97	10.3	5.5	3.59								5.6					6.44	2.81					9.51	1								1					1
FALSE	High	Master Protein	A0A087ZYB7	10-formyltetrahydrofolate dehydrogenase OS=Apis mellifera OX=7460 PE=3 SV=1		0	FALSE	48.705	15	12	14	11	919	102.2	6.44														22.67				2.38	2.53															9
FALSE	High	Master Protein	A0A087ZUP0	14_3_3 domain-containing protein OS=Apis mellifera OX=7460 GN=14-3-3epsilon PE=3 SV=1		0	FALSE	90.272	44	12	157	10	256	29.1	4.89	8.94	16.13	11.62	6.5	8.37	17.08	4.6	4.55	7.95	19.27	38.69	59.28	15.65	21.3	6.26	12.21	30.76	12.67	25.42	3.97	4	4	3	2	2	7	2	2	2	5	9	10	4	5
FALSE	High	Master Protein	A0A0A5L8C3	2,3,4,5-tetrahydropyridine-2,6-dicarboxylate N-succinyltransferase OS=Serratia marcescens OX=615 GN=dapD PE=3 SV=1		0	FALSE	41.784	22	5	10	5	274	29.9	5.74									3.92					3.24						29.14									1					1
FALSE	High	Master Protein	V5T720	2,3-bisphosphoglycerate-dependent phosphoglycerate mutase OS=Lactobacillus kimbladii OX=1218506 GN=gpmA PE=3 SV=1		0	FALSE	12.715	16	3	8	3	246	28.5	6.46			8.43						4.18						0					4.66			2						2
FALSE	High	Master Protein	A0A093T4H2	2,3-bisphosphoglycerate-dependent phosphoglycerate mutase OS=Pectobacterium carotovorum subsp. carotovorum OX=555 GN=gpmA PE=3 SV=1		0	FALSE	26.945	24	5	26	2	250	28.4	5.76					2.44				9.28					8.01	10.36					39.08					1				4					2
FALSE	High	Master Protein	A0A086FM71	2,3-bisphosphoglycerate-dependent phosphoglycerate mutase OS=Serratia marcescens OX=615 GN=gpmA PE=3 SV=1		0	FALSE	38.296	44	7	25	4	250	28.6	5.44					2.44				6.43					5.31	10.26					37.21					1				2					2
FALSE	High	Master Protein	H9XP47	2,3-butanediol dehydrogenase OS=Serratia marcescens OX=615 GN=budC PE=4 SV=1		0	FALSE	22.453	27	4	14	4	251	26.2	5.87					4.32															37.94					2
FALSE	High	Master Protein	A0A2G4QXT6	2,5-didehydrogluconate reductase DkgA OS=Serratia marcescens OX=615 GN=CS370_04140 PE=4 SV=1		0	FALSE	8.422	11	2	2	2	274	30.8	5.5																				5.42
FALSE	High	Master Protein	A0A093T723	2,5-diketo-D-gluconic acid reductase OS=Pectobacterium carotovorum subsp. carotovorum OX=555 GN=dkgA PE=4 SV=1		0.009	FALSE	2.252	3	1	1	1	275	31.1	6.76														2.12																				1
FALSE	High	Master Protein	A0A088A1W8	26S proteasome non-ATPase regulatory subunit 2 OS=Apis mellifera OX=7460 GN=Psmd2 PE=3 SV=1		0	FALSE	174.567	47	29	172	29	892	98.6	5.52	34.67	49.06	16.46	1.72	4.79	17.99	23.73	4.24		11.38	51.5	54.86	29.84	3.22	4.08	11.33	17.2	11.54	21.51		13	15	7	2	2	8	9	2		4	15	15	10	3
FALSE	High	Master Protein	T0MBK8	26s proteasome regulatory complex component OS=Nosema apis BRL 01 OX=1037528 GN=NAPIS_ORF01869 PE=4 SV=1		0.008	FALSE	2.383	5	1	7	1	371	44.6	7.68		2.16		2.45	2.52			2.26					2.86		2.03							1		1	1			1					1
FALSE	High	Master Protein	A0A0M3UJJ1	2-amino-3-ketobutyrate coenzyme A ligase OS=Serratia marcescens OX=615 GN=kbl PE=3 SV=1		0	FALSE	16.71	12	4	5	4	398	42.8	6.1																				14.79
FALSE	High	Master Protein	A0A093SU65	2-dehydro-3-deoxyphosphooctonate aldolase OS=Pectobacterium carotovorum subsp. carotovorum OX=555 GN=kdsA PE=3 SV=1		0	FALSE	7.723	7	2	2	2	284	30.8	6.23																				5.53
FALSE	High	Master Protein	A0A093UU70	2-hydroxy-3-oxopropionate reductase OS=Pectobacterium carotovorum subsp. carotovorum OX=555 GN=garR PE=3 SV=1		0	FALSE	3.956	4	1	1	1	294	30.4	5.67																				3.08
FALSE	High	Master Protein	A0A221DYJ6	2-hydroxyhepta-2,4-diene-1,7-dioate isomerase OS=Serratia marcescens OX=615 GN=BVG97_25495 PE=4 SV=1		0.002	FALSE	2.969	6	1	1	1	210	22.4	7.5																				0
FALSE	High	Master Protein	A0A088AQJ5	2-methoxy-6-polyprenyl-1,4-benzoquinol methylase, mitochondrial OS=Apis mellifera OX=7460 GN=coq5 PE=3 SV=1		0	FALSE	13.009	12	2	8	2	275	31.9	6.95	7.21	6.04	6.41				7.1														2	2	2				2
FALSE	High	Master Protein	A0A088A189	2-oxoacid_dh domain-containing protein OS=Apis mellifera OX=7460 PE=4 SV=1		0	FALSE	111.791	48	12	332	12	311	33.8	9.45	73.85	44.49	62.84	24.03	39.38	66.21	75.83	78.72	41.8	41.88	57.33	60.45	56.16	64.3	24.6	17.74	17.3	15.98	13.46	3.88	9	7	8	7	7	11	9	10	8	8	10	9	9	10
FALSE	High	Master Protein	A0A1Q4NUL1	2-oxoglutarate dehydrogenase E1 component OS=Serratia marcescens OX=615 GN=BHU62_22030 PE=4 SV=1		0	FALSE	50.177	18	11	17	11	935	105.1	6.39									4.05					6.49	7.02					25.28									1					2
FALSE	High	Master Protein	A0A1B4XNH3	2-oxoisovalerate dehydrogenase OS=Enterococcus faecalis OX=1351 GN=A6B47_06280 PE=4 SV=1		0	FALSE	4.755	3	1	1	1	325	35.4	4.75														3.4																				1
FALSE	High	Master Protein	A0A093SAA8	2-succinyl-6-hydroxy-2,4-cyclohexadiene-1-carboxylate synthase OS=Pectobacterium carotovorum subsp. carotovorum OX=555 GN=menH PE=3 SV=1		0.01	FALSE	2.15	6	1	8	1	253	27.9	7.39			2.4			2.11	2.26	2.58	2.45		2.22	2.23	2.24										1			1	1	1	1		1	1	1
FALSE	High	Master Protein	A0A0U6T897	3'(2'),5'-bisphosphate nucleotidase CysQ OS=Serratia marcescens OX=615 GN=cysQ PE=4 SV=1		0.001	FALSE	3.829	8	2	2	2	246	27.2	5.6																				4.2
FALSE	High	Master Protein	A0A093T1F2	30S ribosomal protein S1 OS=Pectobacterium carotovorum subsp. carotovorum OX=555 GN=rpsA PE=3 SV=1		0	FALSE	80.839	32	11	44	1	557	61.2	5.02	2.49			2.28	7.83	2.09			8.54	6.76				14.53	13.86					87.27	1			1	2	1			2	2				4
FALSE	High	Master Protein	A0A084X126	30S ribosomal protein S1 OS=Serratia marcescens OX=615 GN=rpsA PE=3 SV=1		0	FALSE	95.651	38	14	51	4	557	61.2	5	2.49			2.28	7.83	2.09			10.8	6.76				12.48	11.56					110.41	1			1	2	1			3	2				3
FALSE	High	Master Protein	A0A086FJL8	30S ribosomal protein S10 OS=Serratia marcescens OX=615 GN=rpsJ PE=3 SV=1		0	FALSE	21.805	41	4	26	4	103	11.8	9.86	2.92				2.7	2.13			10.34	2.5				8.59	9.13			3.19		21.67	1				2	1			2	1				2
FALSE	High	Master Protein	A0A086FJJ7	30S ribosomal protein S11 OS=Serratia marcescens OX=615 GN=rpsK PE=3 SV=1		0	FALSE	12.554	28	3	9	3	129	13.9	11.33					3.22				3.15					3.88	5.47					10.14					1				1					1
FALSE	High	Master Protein	A0A0J5CEB5	30S ribosomal protein S12 OS=Serratia marcescens OX=615 GN=rpsL PE=3 SV=1		0	FALSE	10.73	10	2	7	2	124	13.6	10.62									0					3.84	5.28					4.64									1					1
FALSE	High	Master Protein	C5CC38	30S ribosomal protein S13 OS=Micrococcus luteus (strain ATCC 4698 / DSM 20030 / JCM 1464 / NBRC 3333 / NCIMB 9278 / NCTC 2665 / VKM Ac-2230) OX=465515 GN=rpsM PE=3 SV=1		0.01	FALSE	2.16	7	1	1	1	122	13.7	10.54															1.61
FALSE	High	Master Protein	A0A093UPK8	30S ribosomal protein S13 OS=Pectobacterium carotovorum subsp. carotovorum OX=555 GN=rpsM PE=3 SV=1		0.007	FALSE	2.471	7	1	4	1	118	13.2	10.95									0					2.03	1.8			1.69											1					1
FALSE	High	Master Protein	A0A084WVH3	30S ribosomal protein S13 OS=Serratia marcescens OX=615 GN=rpsM PE=3 SV=1		0	FALSE	19.12	29	3	10	3	118	13.2	10.78					2.13										1.87					23.82					1
FALSE	High	Master Protein	A0A1S6LRK7	30S ribosomal protein S14 OS=Serratia marcescens OX=615 GN=rpsN PE=3 SV=1		0	FALSE	21.123	19	2	7	2	101	11.5	11.02															5.98					20.69
FALSE	High	Master Protein	A0A080V2U4	30S ribosomal protein S15 OS=Serratia marcescens OX=615 GN=rpsO PE=3 SV=1		0.006	FALSE	2.598	10	1	2	1	89	10.2	10.65															2.31					2.21
FALSE	High	Master Protein	A0A086FBK9	30S ribosomal protein S16 OS=Serratia marcescens OX=615 GN=rpsP PE=3 SV=1		0	FALSE	19.378	44	3	7	2	82	9.1	10.55	1.9																			20.95	1
FALSE	High	Master Protein	A0A093R3X3	30S ribosomal protein S17 OS=Pectobacterium carotovorum subsp. carotovorum OX=555 GN=rpsQ PE=3 SV=1		0	FALSE	18.426	23	1	4	1	84	9.7	9.6														9.42	3.72																			1
FALSE	High	Master Protein	A0A086FJK8	30S ribosomal protein S17 OS=Serratia marcescens OX=615 GN=rpsQ PE=3 SV=1		0	FALSE	23.065	23	1	4	1	84	9.6	9.45																				18.21
FALSE	High	Master Protein	A0A080UUJ8	30S ribosomal protein S18 OS=Serratia marcescens OX=615 GN=rpsR PE=3 SV=1		0	FALSE	12.304	37	3	15	3	75	9	10.59					2.3				3.82					9.67	10.08					9.16					1				1					2
FALSE	High	Master Protein	A0A087EPJ8	30S ribosomal protein S19 OS=Lactobacillus kunkeei OX=148814 GN=rpsS PE=3 SV=1		0.004	FALSE	2.777	9	1	2	1	91	10.5	9.77			2.17												2.35								1
FALSE	High	Master Protein	A0A093S509	30S ribosomal protein S19 OS=Pectobacterium carotovorum subsp. carotovorum OX=555 GN=rpsS PE=3 SV=1		0	FALSE	16.265	37	4	18	4	92	10.4	10.65				2.85	6.91				7.62	8.2				5.22	7.67					10.58				1	1				1	1				2
FALSE	High	Master Protein	V5T8V1	30S ribosomal protein S2 OS=Lactobacillus kimbladii OX=1218506 GN=rpsB PE=3 SV=1		0	FALSE	20.783	29	5	7	5	267	29.6	4.92			8.91												3.61								4
FALSE	High	Master Protein	A0A093SR69	30S ribosomal protein S2 OS=Pectobacterium carotovorum subsp. carotovorum OX=555 GN=rpsB PE=3 SV=1		0	FALSE	44.298	37	9	45	3	241	26.7	7.14	3.04		0	1.96	8.39	1.61			12.28	1.94				21.94	27.74					26.89	2		1	1	3	1			3	1				4
FALSE	High	Master Protein	A0A0P0QIA0	30S ribosomal protein S2 OS=Serratia marcescens OX=615 GN=rpsB PE=3 SV=1		0	FALSE	68.873	55	11	50	5	241	26.6	8.13	3.04		0	1.96	11.2	1.61			15.65	1.94				24.57	27.2					43.64	2		1	1	4	1			5	1				3
FALSE	High	Master Protein	A0A0F6KYQ5	30S ribosomal protein S20 OS=Serratia marcescens OX=615 GN=rpsT PE=3 SV=1		0	FALSE	6.526	31	1	1	1	87	9.7	11.75																				5.32
FALSE	High	Master Protein	A0A093U1P3	30S ribosomal protein S21 OS=Pectobacterium carotovorum subsp. carotovorum OX=555 GN=rpsU PE=3 SV=1		0	FALSE	22.423	34	5	12	5	71	8.5	11.15				0											0					27.35				1
FALSE	High	Master Protein	A0A093S414	30S ribosomal protein S3 OS=Pectobacterium carotovorum subsp. carotovorum OX=555 GN=rpsC PE=3 SV=1		0	FALSE	43.916	48	8	34	2	233	26.1	10.2					6.26	0			3.19		0			12.68	21.49					30.43					2	1			3		1			4
FALSE	High	Master Protein	A0A086FJL1	30S ribosomal protein S3 OS=Serratia marcescens OX=615 GN=rpsC PE=3 SV=1		0	FALSE	79.942	48	9	58	3	232	25.9	10.24					14.24	3.91			17.97		0			22.42	37.03					76.75					4	2			5		1			7
FALSE	High	Master Protein	A0A093S524	30S ribosomal protein S4 OS=Pectobacterium carotovorum subsp. carotovorum OX=555 GN=rpsD PE=3 SV=1		0	FALSE	10.334	16	4	20	2	206	23.5	10.08					1.99	0			5.65	4.51				11.77	14.78					4.48					1	1			2	2				3
FALSE	High	Master Protein	A0A0P0Q7M8	30S ribosomal protein S4 OS=Serratia marcescens OX=615 GN=rpsD PE=3 SV=1		0	FALSE	37.049	34	7	32	5	206	23.6	10.02					5.51				9.61	2.06				14.75	24.22					26.39					2				3	1				4
FALSE	High	Master Protein	A0A1X3C501	30S ribosomal protein S5 OS=Enterococcus faecalis OX=1351 GN=rpsE PE=3 SV=1		0	FALSE	9.134	13	2	7	2	158	16.4	9.7			5.66											2.28	3.12			2.85		5.12			2											1
FALSE	High	Master Protein	A0A093RB73	30S ribosomal protein S5 OS=Pectobacterium carotovorum subsp. carotovorum OX=555 GN=rpsE PE=3 SV=1		0	FALSE	43.404	37	4	25	1	166	17.4	10.23	2.67				3.09				14.64	3.48				21.72	20.01					9.37	1				1				3	1				4
FALSE	High	Master Protein	A0A084WVH0	30S ribosomal protein S5 OS=Serratia marcescens OX=615 GN=rpsE PE=3 SV=1		0	FALSE	36.369	43	5	23	2	166	17.4	10.36	2.67				3.09				14.64					15.05	18.89					12.86	1				1				3					3
FALSE	High	Master Protein	A0A084WX88	30S ribosomal protein S6 OS=Serratia marcescens OX=615 GN=rpsF PE=3 SV=1		0	FALSE	41.705	64	6	35	6	132	15.3	5.38	3.13			2.07	11.64	1.98			10.61					28.27	28.86					6.83	1			1	4	1			3					5
FALSE	High	Master Protein	V5T8C7	30S ribosomal protein S7 OS=Lactobacillus mellis OX=1218508 GN=rpsG PE=3 SV=1		0.006	FALSE	2.656	6	1	1	1	156	17.8	9.98			2.15																				1
FALSE	High	Master Protein	A0A093SE37	30S ribosomal protein S7 OS=Pectobacterium carotovorum subsp. carotovorum OX=555 GN=rpsG PE=3 SV=1		0	FALSE	53.113	60	9	50	1	156	17.6	10.3					1.66				14.4	5.61				12.66	18.1					63.1					2				5	1				5
FALSE	High	Master Protein	A0A084WXG7	30S ribosomal protein S7 OS=Serratia marcescens OX=615 GN=rpsG PE=3 SV=1		0	FALSE	55.369	59	9	50	1	156	17.6	10.3			2.05		1.66				14.4	5.61				10.88	16.25			1.76		63.1			1		2				5	1				4
FALSE	High	Master Protein	A0A084WVG7	30S ribosomal protein S8 OS=Serratia marcescens OX=615 GN=rpsH PE=3 SV=1		0.01	FALSE	2.154	7	1	1	1	130	14.1	9.54															1.78
FALSE	High	Master Protein	A0A093SSI8	30S ribosomal protein S9 OS=Pectobacterium carotovorum subsp. carotovorum OX=555 GN=rpsI PE=3 SV=1		0	FALSE	15.416	32	4	17	1	130	14.8	11.09	2.14								4.17					6.48	10.74					10.02	1								2					2
FALSE	High	Master Protein	A0A080UUI6	30S ribosomal protein S9 OS=Serratia marcescens OX=615 GN=rpsI PE=3 SV=1		0	FALSE	14.853	38	5	18	2	130	14.8	11.09					2.12				4.5					8.48	8.6					10.72					1				2					2
FALSE	High	Master Protein	A0A221FWR4	3D-(3,5/4)-trihydroxycyclohexane-1,2-dione acylhydrolase (Decyclizing) OS=Serratia marcescens OX=615 GN=BVG93_23075 PE=3 SV=1		0.004	FALSE	2.755	2	1	1	1	646	70.6	5.95																				2.3
FALSE	High	Master Protein	A0A0G8BDI3	3-deoxy-manno-octulosonate cytidylyltransferase OS=Serratia marcescens OX=615 GN=kdsB PE=3 SV=1		0.004	FALSE	2.693	5	1	1	1	249	27.2	5.96																				0
FALSE	High	Master Protein	A0A087ZZQ9	3-hydroxy-3-methylglutaryl coenzyme A synthase OS=Apis mellifera OX=7460 GN=Hmgs PE=3 SV=1		0.002	FALSE	3.082	4	1	1	1	453	50.8	7.74																			0
FALSE	High	Master Protein	A0A093SJQ9	3-hydroxyacyl-[acyl-carrier-protein] dehydratase FabZ OS=Pectobacterium carotovorum subsp. carotovorum OX=555 GN=fabZ PE=3 SV=1		0.006	FALSE	2.631	5	1	3	1	151	17.1	6.33									2.16						1.77					0									1
FALSE	High	Master Protein	A0A088AET4	3-hydroxyisobutyryl-CoA hydrolase, mitochondrial OS=Apis mellifera OX=7460 GN=LOC412796 PE=3 SV=1		0	FALSE	125.344	49	19	187	19	440	48.7	8.75	78.58	40.81	18.35	5.06	2.31	10.53	39.82	24.28	2.12	3.17	26.8	34.85	34.25	17.03		8.71	18.24	6.83	17.36		15	11	7	3	1	4	10	7	1	2	8	12	9	10
FALSE	High	Master Protein	A0A0G3SML0	3-isopropylmalate dehydrogenase OS=Serratia marcescens OX=615 GN=leuB PE=3 SV=1		0	FALSE	7.632	8	2	2	2	363	39.4	5.73																				5.83
FALSE	High	Master Protein	A0A093V7L5	3-ketoacyl-CoA thiolase OS=Pectobacterium carotovorum subsp. carotovorum OX=555 GN=fadA PE=3 SV=1		0	FALSE	12.289	8	3	5	1	387	40.9	6.8																				12.44
FALSE	High	Master Protein	A0A1Q4NU29	3-ketoacyl-CoA thiolase OS=Serratia marcescens OX=615 GN=fadA PE=3 SV=1		0	FALSE	58.694	43	10	20	8	387	41.2	6.71																				60.14
FALSE	High	Master Protein	A0A221HC22	3-ketoacyl-CoA thiolase OS=Serratia marcescens OX=615 GN=fadI PE=3 SV=1		0	FALSE	5.973	5	2	3	2	436	46.3	8.63																				8.11
FALSE	High	Master Protein	A0A086FI39	3-oxoacyl-[acyl-carrier-protein] synthase 1 OS=Serratia marcescens OX=615 GN=fabB PE=3 SV=1		0	FALSE	10.219	10	4	6	2	406	42.6	5.34															1.65					11.91
FALSE	High	Master Protein	A0A1Q5WCY1	3-oxoacyl-[acyl-carrier-protein] synthase 3 OS=Serratia marcescens OX=615 GN=fabH PE=3 SV=1		0	FALSE	4.861	4	1	1	1	317	33.8	5.3																				3.15
FALSE	High	Master Protein	A0A088AQA3	3-oxoacyl-[acyl-carrier-protein] synthase OS=Apis mellifera OX=7460 GN=LOC413655 PE=3 SV=1		0	FALSE	5.794	9	2	2	2	440	47	8.4		2.16										2.43										1										1
FALSE	High	Master Protein	A0A0G8B235	3-oxoacyl-ACP reductase OS=Serratia marcescens OX=615 GN=fabG PE=4 SV=1		0	FALSE	11.215	14	2	2	2	244	25.6	6.24																				6.9
FALSE	High	Master Protein	A0A093SP88	3-oxoacyl-ACP synthase OS=Pectobacterium carotovorum subsp. carotovorum OX=555 GN=KP17_09140 PE=3 SV=1		0	FALSE	6.227	7	3	3	1	405	42.7	5.55																				6.88
FALSE	High	Master Protein	A0A2G4QPI7	3-phosphoserine/phosphohydroxythreonine transaminase (Fragment) OS=Serratia marcescens OX=615 GN=CS370_17160 PE=3 SV=1		0.006	FALSE	2.588	6	1	1	1	215	23.5	5.17															1.64
FALSE	High	Master Protein	A0A093T9Q9	3-phosphoshikimate 1-carboxyvinyltransferase OS=Pectobacterium carotovorum subsp. carotovorum OX=555 GN=aroA PE=3 SV=1		0.002	FALSE	3.102	3	1	1	1	429	46.6	5.4																				2.61
FALSE	High	Master Protein	A0A0M4S1X6	40-residue YVTN family beta-propeller repeat OS=Serratia marcescens OX=615 GN=yncE_3 PE=4 SV=1		0	FALSE	38.824	22	8	30	7	410	44.4	8.19	1.63					1.7					1.81	1.65	1.87	1.66		0	1.84	1.63	1.8	45.04	1					1					1	1	1	1
FALSE	High	Master Protein	A0A088AI57	40S ribosomal protein S12 OS=Apis mellifera OX=7460 PE=3 SV=1		0	FALSE	46.368	45	7	37	7	168	18.6	7.12	5.52	7.79	0			6.87	7.58	4.27		0	17.96	30.18	7.95				11.62		3.3		2	2	1			2	1	1		1	3	5	1
FALSE	High	Master Protein	A0A088AVR2	40S ribosomal protein S21 OS=Apis mellifera OX=7460 GN=LOC551479 PE=3 SV=1		0	FALSE	22.052	24	3	11	3	83	9.2	6.52		2.32				0					5.06	4.52					9.17		2.78			1				1					1	2
FALSE	High	Master Protein	A0A088A5I5	40S ribosomal protein S24 OS=Apis mellifera OX=7460 GN=LOC408799 PE=3 SV=1		0	FALSE	28.805	28	4	65	4	132	15.3	10.89	16.87	13.29	11.76	6.76	12.21	6.74	21.47	12.09	11.8	9.94	9.07	8.87	11.62	10.49	10.34	0					3	2	3	1	2	1	4	4	3	2	1	1	2	2
FALSE	High	Master Protein	A0A088AFP5	40S ribosomal protein S25 OS=Apis mellifera OX=7460 GN=RpS25 PE=3 SV=1		0	FALSE	37.694	35	5	100	5	119	13.4	10.36	7.84	14.19	4.27	12.48	13.2	11.82	18.4	13.77	12.65	4.55	25.74	12.27	23.08	10.39	6.63	16.87	20.58	13.92	14.96		2	4	2	4	3	4	4	4	4	2	5	4	4	3
FALSE	High	Master Protein	A0A088AKL1	40S ribosomal protein S26 OS=Apis mellifera OX=7460 GN=RpS26 PE=3 SV=1		0	FALSE	14.083	21	2	54	2	114	13.1	11.14	8.1	8.49	10.21	2.08	7.57	2.19	8.36	2.22	5.24	2.3	9.68	5.11	9.59	4.97	6.47	6.53	11.5	4.62	6.33		2	2	2	1	2	1	2	1	2	1	2	1	2	2
FALSE	High	Master Protein	A0A088A003	40S ribosomal protein S30 OS=Apis mellifera OX=7460 GN=RpS30 PE=3 SV=1		0	FALSE	4.063	8	1	1	1	132	14.7	10.14																	2.97
FALSE	High	Master Protein	A0A088AD55	40S ribosomal protein S3a OS=Apis mellifera OX=7460 GN=RpS3A PE=3 SV=1		0	FALSE	117.87	57	16	258	16	267	30	9.66	41.08	49.24	16.38	11.2	30.02	26.1	57.04	28.59	26.09	17.31	50.91	36.07	46.44	16.53	24.45	15.18	38.29	34.08	44.22		10	11	6	6	7	9	12	9	9	5	13	12	11	5
FALSE	High	Master Protein	A0A088AHT9	40S ribosomal protein S4 OS=Apis mellifera OX=7460 GN=LOC550651 PE=3 SV=1		0	FALSE	103.634	55	15	319	15	262	29.4	10.24	49.55	46.71	44.45	32.51	53.62	31.11	67.92	47.16	46.26	42.22	56.97	43.89	66.84	31.23	45.67	23.98	31.82	12.37	8.99	0	10	10	8	7	11	6	12	8	10	9	11	11	12	7
FALSE	High	Master Protein	A0A088AFT2	40S ribosomal protein S6 OS=Apis mellifera OX=7460 GN=LOC725647 PE=3 SV=1		0	FALSE	46.985	19	4	109	4	251	28.9	10.95	2.19	16.11	6.67	2.24	10.28	10.14	14.04	8	8.78	7.42	19.77	11.27	18.27	12.6	11.44	8.61	15.23	17.69	12.72		1	4	2	2	2	3	3	3	3	3	4	3	3	3
FALSE	High	Master Protein	A0A088A8A7	40S ribosomal protein S7 OS=Apis mellifera OX=7460 GN=RpS7 PE=3 SV=1		0	FALSE	82.079	56	10	265	10	214	24.6	9.76	43.4	47.44	40.97	27.35	30.47	25.01	52.02	29.87	22.19	18.21	17.79	22.85	30.41	4.39	8.36	17.75	18.81	16.55	7.61	0	8	9	8	9	8	6	10	10	8	6	6	7	7	6
FALSE	High	Master Protein	A0A087ZV06	40S ribosomal protein S8 OS=Apis mellifera OX=7460 GN=Rps8 PE=3 SV=1		0	FALSE	83.72	52	10	159	10	208	23.9	10.59	32.92	21.58	13.9	9.71	16.63	17.8	34.92	9.61	12.75	11.67	33.5	19.33	33.2	22.05	17.45	19.56	22.67	20.34	16.92		7	8	6	4	4	7	9	4	7	4	9	6	9	6
FALSE	High	Master Protein	T0L9B2	40s ribosomal protein s9 OS=Nosema apis BRL 01 OX=1037528 GN=NAPIS_ORF01340 PE=4 SV=1		0.004	FALSE	2.782	5	1	15	1	187	22	9.58	2.19		1.98			1.81			3.77		0		1.77	2.01			2.21	0		0	1		1			1			1		1		1	1
FALSE	High	Master Protein	A0A087ZXD5	40S ribosomal protein SA OS=Apis mellifera OX=7460 GN=RpSA PE=3 SV=1		0	FALSE	75.777	34	7	162	7	310	33.7	5.05	37.69	25.76	13.45	5.87	11.49	26.13	21.43	14.14	2.82	9.56	49.88	26.05	13.99	18.03	5.53	7.59	42.98	28.94	65.23		6	6	4	2	5	7	5	4	1	3	7	6	4	5
FALSE	High	Master Protein	A0A2G4Q5L5	4-hydroxyphenylacetate 3-monooxygenase, oxygenase component OS=Serratia marcescens OX=615 GN=hpaB PE=4 SV=1		0	FALSE	4.293	2	1	1	1	520	59.1	6.33																				2.49
FALSE	High	Master Protein	A0A087EMQ1	4-hydroxy-tetrahydrodipicolinate reductase OS=Lactobacillus kunkeei OX=148814 GN=dapB PE=3 SV=1		0	FALSE	6.568	9	1	1	1	252	27.7	4.56			3.68																				1
FALSE	High	Master Protein	V5T6L1	50S ribosomal protein L1 OS=Lactobacillus kimbladii OX=1218506 GN=rplA PE=3 SV=1		0	FALSE	18.214	23	4	4	4	230	24.6	9.04			11.58																				4
FALSE	High	Master Protein	A0A093SBV7	50S ribosomal protein L1 OS=Pectobacterium carotovorum subsp. carotovorum OX=555 GN=rplA PE=3 SV=1		0	FALSE	28.252	34	6	30	2	234	24.7	9.61	4.09				5.91	2.12			8.35		2.78			12.16	10.61					24.71	2				2	1			3		1			3
FALSE	High	Master Protein	A0A0J5CEK9	50S ribosomal protein L1 OS=Serratia marcescens OX=615 GN=rplA PE=3 SV=1		0	FALSE	43.673	52	9	52	5	234	24.7	9.64	4.09				8.08	2.12			21.69	6.29	2.78			8.88	23.34			3.85		58.34	2				3	1			6	1	1			2
FALSE	High	Master Protein	A0A086FBY1	50S ribosomal protein L10 OS=Serratia marcescens OX=615 GN=rplJ PE=3 SV=1		0	FALSE	17.467	32	4	12	4	165	17.8	9.01									3.41					10.22	8.19					12.46									1					3
FALSE	High	Master Protein	A0A084WV65	50S ribosomal protein L11 OS=Serratia marcescens OX=615 GN=rplK PE=3 SV=1		0	FALSE	16.161	26	3	13	3	142	14.9	9.63	1.68			0	1.7	1.88			3.39					1.6						17.43	1			1	1	1			1					1
FALSE	High	Master Protein	A0A1Q4P0L0	50S ribosomal protein L13 OS=Serratia marcescens OX=615 GN=rplM PE=3 SV=1		0	FALSE	35.216	63	8	29	1	142	16	9.82				0	1.97				5.59	0				13.28	6.95					13.25				1	2				3	1				4
FALSE	High	Master Protein	V5YVZ3	50S ribosomal protein L13 OS=Serratia marcescens OX=615 GN=rplM PE=3 SV=1		0	FALSE	33.493	57	8	29	1	157	17.8	9.86	2.68			0	1.97				5.59	0				9.08	4.81					17.64	1			1	2				3	1				3
FALSE	High	Master Protein	A0A080UVX0	50S ribosomal protein L14 OS=Serratia marcescens OX=615 GN=rplN PE=3 SV=1		0	FALSE	26.352	43	4	24	4	123	13.6	10.42	3.66				2.06				6.51	2.07				8.78	14.45					28.44	1				1				2	1				2
FALSE	High	Master Protein	A0A084WVH1	50S ribosomal protein L15 OS=Serratia marcescens OX=615 GN=rplO PE=3 SV=1		0	FALSE	16.113	34	4	4	4	144	15.1	11.14														2.41						8.53														1
FALSE	High	Master Protein	A0A093RB82	50S ribosomal protein L16 OS=Pectobacterium carotovorum subsp. carotovorum OX=555 GN=rplP PE=3 SV=1		0	FALSE	24.909	34	4	17	4	136	15.3	11.05									6.89					14.76	8.12					13.49									3					3
FALSE	High	Master Protein	A0A086FJJ4	50S ribosomal protein L17 OS=Serratia marcescens OX=615 GN=rplQ PE=3 SV=1		0	FALSE	19.252	33	5	34	5	129	14.6	11.03	3.45			2.4	5.57				11.92					14.28	21.93			2.1		29.73	1			1	2				3					4
FALSE	High	Master Protein	A0A093S424	50S ribosomal protein L18 OS=Pectobacterium carotovorum subsp. carotovorum OX=555 GN=rplR PE=3 SV=1		0	FALSE	6.997	15	2	5	2	117	12.7	10.55									1.93					4.26	2.38														1					2
FALSE	High	Master Protein	A0A0G8B917	50S ribosomal protein L19 OS=Serratia marcescens OX=615 GN=rplS PE=3 SV=1		0	FALSE	20.967	42	4	13	4	118	13.5	10.78					2.03				2.68					10.45	5.17					11.79					1				1					2
FALSE	High	Master Protein	A0A1X3AIR2	50S ribosomal protein L2 OS=Enterococcus faecalis OX=1351 GN=rplB PE=3 SV=1		0.01	FALSE	2.195	7	1	1	1	261	28.5	10.45	0																				1
FALSE	High	Master Protein	A0A093SBE1	50S ribosomal protein L2 OS=Pectobacterium carotovorum subsp. carotovorum OX=555 GN=rplB PE=3 SV=1		0	FALSE	63.86	30	6	56	1	273	29.9	10.93	9.14			5.09	18.09				22.72	5.66				42.27	28.63					38.35	2			2	5				4	1				6
FALSE	High	Master Protein	A0A1Q4NU74	50S ribosomal protein L2 OS=Serratia marcescens OX=615 GN=rplB PE=3 SV=1		0	FALSE	71.303	38	8	60	3	274	30	10.95	9.14			5.09	15.23				19.5	5.66				41.68	35.11					47.48	2			2	4				3	1				6
FALSE	High	Master Protein	A0A080UXX3	50S ribosomal protein L20 OS=Serratia marcescens OX=615 GN=rplT PE=3 SV=1		0	FALSE	14.097	23	3	23	3	118	13.5	11.47				0	2.48	2.42			7.24					4.95	9.56			2.27		16.52				1	1	1			2					2
FALSE	High	Master Protein	A0A093UVI3	50S ribosomal protein L21 OS=Pectobacterium carotovorum subsp. carotovorum OX=555 GN=rplU PE=3 SV=1		0	FALSE	6.665	19	2	5	2	103	11.6	9.92															4.24					6.91
FALSE	High	Master Protein	A0A093SJ62	50S ribosomal protein L22 OS=Pectobacterium carotovorum subsp. carotovorum OX=555 GN=rplV PE=3 SV=1		0	FALSE	37.24	52	5	17	1	110	12.1	9.99									11.73					3.37	5.92			3.21		24.91									4					1
FALSE	High	Master Protein	A0A084WVF9	50S ribosomal protein L22 OS=Serratia marcescens OX=615 GN=rplV PE=3 SV=1		0	FALSE	39.423	51	5	18	1	110	12.2	10.23									8.38					3.37	5.92			3.21		31.5									3					1
FALSE	High	Master Protein	A0A093R4S4	50S ribosomal protein L24 OS=Pectobacterium carotovorum subsp. carotovorum OX=555 GN=rplX PE=3 SV=1		0	FALSE	7.314	20	3	4	3	104	11.3	10.21									1.92											8.73									1
FALSE	High	Master Protein	A0A0G8BDT6	50S ribosomal protein L25 OS=Serratia marcescens OX=615 GN=rplY PE=3 SV=1		0	FALSE	7.285	24	2	3	2	94	10.5	9.64									1.95						2.35					3.23									1
FALSE	High	Master Protein	A0A093T2M3	50S ribosomal protein L28 OS=Pectobacterium carotovorum subsp. carotovorum OX=555 GN=rpmB PE=3 SV=1		0	FALSE	5.72	24	2	11	2	78	9	11.41					4.11				4.56						1.61					8.46					1				1
FALSE	High	Master Protein	A0A093SBE3	50S ribosomal protein L29 OS=Pectobacterium carotovorum subsp. carotovorum OX=555 GN=rpmC PE=3 SV=1		0	FALSE	5.325	24	1	6	1	63	7.2	9.82						0			0					2.03	0					4.47						1			1					1
FALSE	High	Master Protein	A0A086FJK9	50S ribosomal protein L29 OS=Serratia marcescens OX=615 GN=rpmC PE=3 SV=1		0	FALSE	26.398	49	3	27	3	63	7.3	10.15									7.7					14.08						52.02									3					3
FALSE	High	Master Protein	A0A093SJ59	50S ribosomal protein L3 OS=Pectobacterium carotovorum subsp. carotovorum OX=555 GN=rplC PE=3 SV=1		0	FALSE	29.331	28	4	16	4	209	22.2	9.99	2.02			0	0				10.26	0				6	2.06					8.58	1			1	1				4	1				2
FALSE	High	Master Protein	A0A1S6LRJ5	50S ribosomal protein L30 OS=Serratia marcescens OX=615 GN=rpmD PE=3 SV=1		0	FALSE	14.15	58	3	14	3	59	6.6	10.59					3.75	1.93			6.87					8.71	1.87					3.39					1	1			2					3
FALSE	High	Master Protein	A0A0F6KRT0	50S ribosomal protein L31 OS=Serratia marcescens OX=615 GN=rpmE PE=3 SV=1		0	FALSE	6.359	21	1	1	1	71	7.8	9.32																				2.83
FALSE	High	Master Protein	A0A093S407	50S ribosomal protein L4 OS=Pectobacterium carotovorum subsp. carotovorum OX=555 GN=rplD PE=3 SV=1		0	FALSE	29.969	41	6	38	1	201	22	9.6	6.22				4.5	4.06			9.38	0	4.32			20.66	13.19		0			10.74	2				2	2			3	1	2			5
FALSE	High	Master Protein	A0A0G8B608	50S ribosomal protein L4 OS=Serratia marcescens OX=615 GN=rplD PE=3 SV=1		0	FALSE	42.512	56	8	49	3	201	22.1	9.67	6.22				4.5	4.06			13.17	0	4.32			14.74	18.81					31.28	2				2	3			4	1	2			5
FALSE	High	Master Protein	A0A1B4XKS2	50S ribosomal protein L5 OS=Enterococcus faecalis OX=1351 GN=rplE PE=3 SV=1		0.002	FALSE	3.504	9	1	3	1	179	20.1	9.31										7.02																				1
FALSE	High	Master Protein	C5CC50	50S ribosomal protein L5 OS=Micrococcus luteus (strain ATCC 4698 / DSM 20030 / JCM 1464 / NBRC 3333 / NCIMB 9278 / NCTC 2665 / VKM Ac-2230) OX=465515 GN=rplE PE=3 SV=1		0.006	FALSE	2.548	4	1	2	1	191	21.5	9.14									2.09					1.94															1					1
FALSE	High	Master Protein	A0A086FJK5	50S ribosomal protein L5 OS=Serratia marcescens OX=615 GN=rplE PE=3 SV=1		0	FALSE	51.099	56	9	51	2	179	20.2	9.51					10.96	1.81			14.52					19.1	31.09					50.29					3	1			4					5
FALSE	High	Master Protein	A0A0M4QZH8	50S ribosomal protein L5 OS=Serratia marcescens OX=615 GN=rplE PE=3 SV=1		0	FALSE	45.718	52	8	36	1	179	20.2	9.51	3.46			2.52	3.88	2.14			13.28					23.2	19.44					34.42	1			1	1	1			3					5
FALSE	High	Master Protein	A0A093RIL7	50S ribosomal protein L6 OS=Pectobacterium carotovorum subsp. carotovorum OX=555 GN=rplF PE=3 SV=1		0	FALSE	20.818	21	4	18	1	177	18.9	9.7					4.83	2.53			15.59					10.46	7.36					5.87					2	1			4					3
FALSE	High	Master Protein	A0A080UYA0	50S ribosomal protein L6 OS=Serratia marcescens OX=615 GN=rplF PE=3 SV=1		0	FALSE	35.396	36	6	25	3	177	18.9	9.82					2.38	2.53			9.62					18.52	12.11					15.89					1	1			4					5
FALSE	High	Master Protein	A0A246M6P7	50S ribosomal protein L7/L12 OS=Enterococcus faecalis OX=1351 GN=rplL PE=3 SV=1		0.009	FALSE	2.234	10	1	1	1	122	12.4	4.49																				2.45
FALSE	High	Master Protein	A0A093S4J3	50S ribosomal protein L7/L12 OS=Pectobacterium carotovorum subsp. carotovorum OX=555 GN=rplL PE=3 SV=1		0	FALSE	29.736	41	3	23	1	121	12.4	4.65	3.76			0	4.22				4.82	2.4				4.15	3.2			3.9		27.07	1			1	1				1	1				1
FALSE	High	Master Protein	A0A086FBY2	50S ribosomal protein L7/L12 OS=Serratia marcescens OX=615 GN=rplL PE=3 SV=1		0	FALSE	63.436	57	5	50	3	121	12.3	4.65	3.76			2.18	11.25				13.37	2.4				11.22	11.68					54.38	1			2	3				2	1				3
FALSE	High	Master Protein	A0A086FJA0	50S ribosomal protein L9 OS=Serratia marcescens OX=615 GN=rplI PE=3 SV=1		0	FALSE	34.484	46	7	21	7	150	15.8	6.33						3.1			6.54					9.68	8.51					29.45						1			2					4
FALSE	High	Master Protein	A0A0G8B7D7	5-carboxymethyl-2-hydroxymuconate semialdehyde dehydrogenase OS=Serratia marcescens OX=615 GN=BVG93_24535 PE=3 SV=1		0	FALSE	21.904	13	4	6	4	484	52.7	6.11																				20.08
FALSE	High	Master Protein	A0A088A7I3	5-formyltetrahydrofolate cyclo-ligase OS=Apis mellifera OX=7460 GN=100577699 PE=3 SV=1		0	FALSE	8.877	20	4	7	4	195	22.7	8.31											2.46			1.66		1.82			2.16												1			1
FALSE	High	Master Protein	A0A093SFL6	5-methyltetrahydropteroyltriglutamate--homocysteine methyltransferase OS=Pectobacterium carotovorum subsp. carotovorum OX=555 GN=KP17_10275 PE=4 SV=1		0	FALSE	4.52	3	1	4	1	343	38.6	5.83			2.13		4.3										0								1		1
FALSE	High	Master Protein	A0A093SUE8	5-methyltetrahydropteroyltriglutamate--homocysteine methyltransferase OS=Pectobacterium carotovorum subsp. carotovorum OX=555 GN=metE PE=3 SV=1		0	FALSE	23.377	15	6	9	2	754	84.6	5.44															9.08					11.59
FALSE	High	Master Protein	A0A221FU13	5-methyltetrahydropteroyltriglutamate--homocysteine methyltransferase OS=Serratia marcescens OX=615 GN=BVG93_17775 PE=4 SV=1		0	FALSE	5.455	6	1	2	1	343	38.6	5.62					4.73																				1
FALSE	High	Master Protein	A0A0U7LAK5	5-methyltetrahydropteroyltriglutamate--homocysteine methyltransferase OS=Serratia marcescens OX=615 GN=metE PE=3 SV=1		0	FALSE	42.888	12	8	14	1	762	85.6	5.55					4.28										5.56					32.05					2
FALSE	High	Master Protein	A0A2G4Q8W7	5-methyltetrahydropteroyltriglutamate--homocysteine methyltransferase OS=Serratia marcescens OX=615 GN=metE PE=3 SV=1		0	FALSE	44.097	13	8	15	1	757	85.1	5.6					1.9										10.87					32.05					1
FALSE	High	Master Protein	A0A084X5K9	6,7-dimethyl-8-ribityllumazine synthase OS=Serratia marcescens OX=615 GN=ribH PE=3 SV=1		0	FALSE	22.157	38	4	12	4	156	16.1	5.24					3.44	2.39			3.35					7.87	2.56					15.87					1	1			1					2
FALSE	High	Master Protein	A0A0G2R3H2	60 kDa chaperonin (Fragment) OS=Serratia marcescens OX=615 GN=groEL PE=3 SV=1		0	FALSE	171.65	56	23	136	7	540	56.6	4.97	5.58			2.04	15.2	10.03			30.78	8.84	2.26			56.57	24.74			1.94	1.84	203.01	2			1	6	5			10	3	2			12
FALSE	High	Master Protein	Q9EWA9	60 kDa chaperonin (Fragment) OS=Serratia marcescens OX=615 GN=groEL PE=3 SV=1		0	FALSE	97.022	49	14	95	1	329	34.7	5.06	3.65			2.04	13.22	8.18			25.15	5.95	2.26			48.42	19.1			1.94	1.84	108.33	1			1	4	3			7	2	2			10
FALSE	High	Master Protein	Q9F2H1	60 kDa chaperonin (Fragment) OS=Serratia marcescens OX=615 GN=groEL PE=3 SV=1		0	FALSE	95.904	57	15	89	1	329	34.7	5.06	3.65			2.04	13.22	8.18			22.16	5.95	2.26			36.31	19.1			1.94	1.84	101.95	1			1	4	3			7	2	2			10
FALSE	High	Master Protein	V5T6G8	60 kDa chaperonin OS=Bifidobacterium sp. Hma3N OX=1293831 GN=groL PE=3 SV=1		0	FALSE	17.914	12	3	5	3	550	57.9	4.83			9.85																				3
FALSE	High	Master Protein	A0A093SRC3	60 kDa chaperonin OS=Pectobacterium carotovorum subsp. carotovorum OX=555 GN=groL PE=3 SV=1		0	FALSE	105.289	43	17	87	9	548	57	4.91	8.31			2.04	11.28	8.12			22.58	6.56	2.26			74.31	19.33			1.94	1.84	66.07	3			1	4	3			7	2	1			13
FALSE	High	Master Protein	M9SVD1	60 kDa heat shock protein (Fragment) OS=Lactobacillus apis OX=303541 GN=hsp60 PE=4 SV=1		0	FALSE	4.403	8	1	2	1	186	20	4.81			4.42																				1
FALSE	High	Master Protein	A0A087ZPA5	60S acidic ribosomal protein P0 OS=Apis mellifera OX=7460 GN=RpLP0 PE=3 SV=1		0	FALSE	116.449	50	11	209	11	317	34.4	6	55.5	49.41	18.62	21.61	18.31	38.42	50.01	35.23	17.53	28	63.17	48.96	46.32	18.47	21.11	19.8	32.28	14.15	26.18		8	6	4	4	4	7	10	6	4	5	10	7	7	5
FALSE	High	Master Protein	A0A088ARA9	60S ribosomal protein L13 OS=Apis mellifera OX=7460 GN=RpL13 PE=3 SV=1		0	FALSE	40.049	39	9	157	9	219	25.3	10.93	25.5	31.32	18.17	13.04	13.15	17.41	24.42	19.56	13.35	13.98	16.49	12.13	18.24	13.28	14.12	10.26	9.66	3.99	9.59		6	6	4	6	6	5	6	5	6	4	4	5	6	4
FALSE	High	Master Protein	A0A088AH51	60S ribosomal protein L18 OS=Apis mellifera OX=7460 GN=102654426 PE=4 SV=1		0	FALSE	54.439	39	6	159	6	188	21.7	11.75	18.43	28.78	27.62	25.76	30.67	16.41	43.68	18.25	18.46	25.4	34.97	24.39	36.67	30.03	29.74	12.77	30.29	9.15	11.99		3	4	3	4	4	3	6	4	3	3	5	5	4	4
FALSE	High	Master Protein	A0A088A7V4	60S ribosomal protein L18a OS=Apis mellifera OX=7460 GN=RpL18A PE=3 SV=1		0	FALSE	53.864	43	12	191	12	177	21	10.7	24.1	18.72	27.84	10.4	24.52	7.85	23.46	19.49	13.96	15.98	27.89	13.99	23.11	16.22	20.86	6.23	35.91	14.31	15.06	0	8	7	8	6	7	4	8	6	6	6	9	7	9	6
FALSE	High	Master Protein	A0A088ACL1	60S ribosomal protein L27 OS=Apis mellifera OX=7460 GN=RpL27 PE=3 SV=1		0	FALSE	26.898	35	6	52	6	134	16.1	10.59	7.48	7.62	4.97	2.14	2.08	2.18	15.33	5.14	2.59	10.16	16.74	0	6.86	4.07			2.71	0			3	3	2	1	2	2	4	4	1	4	4	1	3	2
FALSE	High	Master Protein	A0A088ACQ3	60S ribosomal protein L29 OS=Apis mellifera OX=7460 GN=RpL29 PE=3 SV=1		0	FALSE	10.063	17	2	5	2	71	8.6	11.58		3.21					7.28				3.22		2.29									1					2				1		1
FALSE	High	Master Protein	H9K170	60S ribosomal protein L32 OS=Apis mellifera OX=7460 GN=RpL32 PE=4 SV=1		0	FALSE	37.463	34	5	50	5	134	15.9	11.6	2.79	8.57	5.47	4.54	2.01	2.86	5.88		2.89	5.65	8.15	13.41	15.1	7.89		6.37	6	4.98	7.93	0	1	3	2	2	2	1	3		1	1	2	3	3	2
FALSE	High	Master Protein	A0A0B4J2P3	60S ribosomal protein L36 OS=Apis mellifera OX=7460 GN=RpL36 PE=3 SV=1		0	FALSE	24.239	37	6	60	6	115	13.4	11.5	4.33	13.23	4.8	6.07	6.61	10.88	16.56	4.91	2.1	2.46	12.93	7.33	10.37	2.1	4.66	5.71	2.27	8.5	5.48		3	4	3	3	3	4	4	2	1	1	4	2	3	1
FALSE	High	Master Protein	A0A087ZWB6	6PF2K domain-containing protein OS=Apis mellifera OX=7460 PE=4 SV=1		0	FALSE	21.5	9	3	6	3	452	52.3	6.54											5.53						2.2	1.96	4.3												2
FALSE	High	Master Protein	A0A088AHG6	6-phosphofructokinase OS=Apis mellifera OX=7460 PE=3 SV=1		0	FALSE	232.745	42	29	330	29	886	98.5	6.68	87.1	67.9	36.87	21.91	32.94	23.9	72.52	22.28	19.18	58.96	76.59	72.66	41.93	42.36	16.11	68.06	42.61	25.18	29.5		19	12	11	7	10	7	15	6	6	15	15	15	11	12
FALSE	High	Master Protein	A0A088AKI3	6-phosphogluconate dehydrogenase, decarboxylating OS=Apis mellifera OX=7460 GN=Pgd PE=3 SV=1		0	FALSE	160.498	62	23	197	23	482	52.9	7.46	70.17	30.83	15.53	5.26	10.34	33.25	1.61	0	2.52	11.87	49.41	22.76	16.56	32.57	2.72	37.7	19.55	15.38	22.14		16	6	5	3	5	12	3	1	2	7	12	8	8	12
FALSE	High	Master Protein	A0A221H706	6-phosphogluconate dehydrogenase, decarboxylating OS=Serratia marcescens OX=615 GN=BVG84_04605 PE=3 SV=1		0	FALSE	46.869	29	9	23	9	468	51.6	5.34	0		0		2.98	0		0	0					2.94	1.66					36.75	1		1		2	1		1	1					1
FALSE	High	Master Protein	A0A088A588	6-phosphogluconolactonase OS=Apis mellifera OX=7460 GN=LOC551785 PE=3 SV=1		0	FALSE	15.245	18	3	8	3	238	26.2	5.97	4.71										2.22		0						4.41		2										2		1
FALSE	High	Master Protein	A0A088A088	A_deaminase domain-containing protein OS=Apis mellifera OX=7460 PE=4 SV=1		0.002	FALSE	2.999	3	1	1	1	393	45.7	5.59												1.93																				1
FALSE	High	Master Protein	A0A088AG31	Aa_trans domain-containing protein OS=Apis mellifera OX=7460 GN=LOC413117 PE=4 SV=1		0	FALSE	7.772	8	2	2	2	457	50.6	8.51		2.33				2.46																1				1
FALSE	High	Master Protein	A0A088AIY5	Aa_trans domain-containing protein OS=Apis mellifera OX=7460 GN=LOC552193 PE=4 SV=1		0	FALSE	14.4	7	2	17	2	481	53.9	7.83	6.31	7.25	0	0	0	2.62	3.73				0	0	0				2.83	3.06	2.34		1	1	1	1	1	1	1				1	1	1
FALSE	High	Master Protein	A0A088A551	Aa_trans domain-containing protein OS=Apis mellifera OX=7460 GN=path PE=4 SV=1		0	FALSE	44.795	18	6	23	6	468	51.6	6.95	2.77	2.08	7.27	5.15		5.61					4.99	2.01	2.33				3.12		14.37		2	1	2	3		2					2	1	1
FALSE	High	Master Protein	A0A088AMB2	AA_TRNA_LIGASE_II domain-containing protein OS=Apis mellifera OX=7460 GN=Aats-asp PE=3 SV=1		0	FALSE	18.942	11	5	9	5	533	60.5	7.05		4.9					4.28				2.34		2.65				2.73		2.24			2					2				1		1
FALSE	High	Master Protein	A0A087ZNA9	AA_TRNA_LIGASE_II domain-containing protein OS=Apis mellifera OX=7460 GN=Aats-ser PE=4 SV=1		0	FALSE	15.934	11	3	4	3	427	49.5	8.76	2.83											2.27	2.92					2.45			1											1	1
FALSE	High	Master Protein	A0A088AUV5	AA_TRNA_LIGASE_II domain-containing protein OS=Apis mellifera OX=7460 GN=LOC410806 PE=3 SV=1		0	FALSE	9.762	8	4	4	4	603	68.6	6.57							2.11									1.62											1
FALSE	High	Master Protein	A0A087ZP92	AA_TRNA_LIGASE_II domain-containing protein OS=Apis mellifera OX=7460 GN=LOC412200 PE=3 SV=1		0	FALSE	62.066	27	17	25	17	714	83.3	7.03	3.38					0				2.29	19.99	7.56	2.41			4.76			3.81		2					1				1	8	3	1
FALSE	High	Master Protein	A0A087ZU43	AA_TRNA_LIGASE_II domain-containing protein OS=Apis mellifera OX=7460 GN=LOC551088 PE=4 SV=1		0	FALSE	17.354	9	3	5	3	556	64.5	6.23	2.82										5.02		2.82				2.97				1										2		1
FALSE	High	Master Protein	A0A088ADF9	AA_TRNA_LIGASE_II domain-containing protein OS=Apis mellifera OX=7460 GN=LOC726436 PE=4 SV=1		0	FALSE	50.419	35	11	72	11	433	49.4	8.76	13.76	22.52	9.83	4.36	6.71	2.22	21.06	11.88	9.59	1.67	9.88	13.2	9.3	1.92	0		2.9	2.88	2.13		5	6	3	3	4	2	5	3	3	1	2	4	3	3
FALSE	High	Master Protein	A0A087ZV42	AA_TRNA_LIGASE_II domain-containing protein OS=Apis mellifera OX=7460 PE=3 SV=1		0	FALSE	4.29	6	2	5	2	635	74	8.84	0	0					0										0	0			1	1					1
FALSE	High	Master Protein	A0A088AUH7	AA_TRNA_LIGASE_II domain-containing protein OS=Apis mellifera OX=7460 PE=4 SV=1		0	FALSE	5.331	5	1	7	1	422	48.3	8.05	2.07	0					2.76				0	2.87	2.52	0							1	1					1				1	1	1	1
FALSE	High	Master Protein	A0A088ARS3	AAA domain-containing protein OS=Apis mellifera OX=7460 GN=bor PE=4 SV=1		0	FALSE	70.559	29	17	78	17	608	68.8	9.03	13.17	4.2	10.1	6.43	9	5.63	9.19	6.85	6.1	7.42	4.88	2.15	9.01	4.12	4.08	0	15.18	10.45	9.96		7	2	6	4	4	4	4	5	7	3	2	1	4	2
FALSE	High	Master Protein	A0A088ADA2	AAA domain-containing protein OS=Apis mellifera OX=7460 GN=LOC409178 PE=4 SV=1		0.006	FALSE	2.608	2	1	2	1	734	82.3	8.92				1.65					2.08															1					1
FALSE	High	Master Protein	A0A0B4J2L4	AAA domain-containing protein OS=Apis mellifera OX=7460 GN=LOC410026 PE=3 SV=1		0	FALSE	105.14	60	16	69	16	415	47	5.33	24.94	15.32	3.03		0	10.37	17.25	0		2.61	36.57	15.58	17.91	0		4.57	5.67	2.48	4.61		6	3	1		1	4	5	1		1	9	5	4	1
FALSE	High	Master Protein	A0A088A5P5	AAA domain-containing protein OS=Apis mellifera OX=7460 GN=LOC410289 PE=4 SV=1		0	FALSE	64.596	26	16	39	16	752	85.5	9.23	13.89	4.91	4.75	1.95	5.81		5.79	1.87			5.45		11.16		2.09	0	11.8	2.3	0		6	3	2	1	2		6	1			3		4
FALSE	High	Master Protein	A0A0B4J2N0	AAA domain-containing protein OS=Apis mellifera OX=7460 GN=LOC550794 PE=3 SV=1		0	FALSE	87.82	44	14	111	13	405	45.7	8.5	31.15	26.85	5.56	5.92	4.83	21.48	28.66	11.83	2.4	6.01	37.01	30.84	29.7	8.36	0	13.93	14.91	11.39	10.89		7	6	2	2	3	8	7	4	1	2	10	9	10	4
FALSE	High	Master Protein	A0A0B4J2P2	AAA domain-containing protein OS=Apis mellifera OX=7460 GN=LOC551386 PE=3 SV=1		0	FALSE	90.183	48	13	92	13	393	44.5	7.44	30.51	26.05	10.77		7.86	6.93	28.02	4.53		9.92	46.14	29.6	21.24	3.25	1.84	6.21	3.04		2.19		8	6	3		5	3	6	2		5	11	7	6	3
FALSE	High	Master Protein	A0A088A5D5	AAA domain-containing protein OS=Apis mellifera OX=7460 GN=LOC552166 PE=3 SV=1		0	FALSE	265.217	45	30	593	30	803	91	8.76	129.86	108.04	91.15	65.93	86.89	43.54	134.72	102.14	71.89	44.68	95.78	74.08	89.03	40.01	28.47	52.84	101.46	69.37	28.28		23	22	20	18	19	15	24	23	20	13	19	19	20	16
FALSE	High	Master Protein	A0A0B4J2L7	AAA domain-containing protein OS=Apis mellifera OX=7460 GN=Pros26.4 PE=3 SV=1		0	FALSE	62.436	34	11	41	10	440	49.2	6.76	9.22	3.41				10.8	6.62			3.31	20.69	11.6	5.33	2.11		2.76	10.31	15.77	8.27		4	1				4	2			1	5	4	2	1
FALSE	High	Master Protein	A0A088A957	AAA domain-containing protein OS=Apis mellifera OX=7460 GN=Rpt1 PE=3 SV=1		0	FALSE	99.277	49	16	90	16	434	48.4	6.07	11.06	21.08	0	1.97	2.24	7.7	20.75			4.19	28.41	27.81	14.86	0		6.27	25.64	14.3	15.67		5	6	1	1	1	4	8			2	9	8	7	1
FALSE	High	Master Protein	A0A088AC90	AAA domain-containing protein OS=Apis mellifera OX=7460 GN=Tbp-1 PE=3 SV=1		0	FALSE	114.549	51	14	129	13	428	47.6	5.17	41.28	31.26	10.23	0	2.2	26.23	38.17	10.44		5.94	62.16	44.63	41.34	11.01		5.25	16.28	5.08	11.13		8	6	4	1	1	5	6	4		2	9	8	9	4
FALSE	High	Master Protein	A0A088AVP1	AAA_28 domain-containing protein OS=Apis mellifera OX=7460 PE=4 SV=1		0	FALSE	11.273	6	3	7	3	520	59.4	8.12	6.08	5.13										0				2.58					3	2										1
FALSE	High	Master Protein	A0A088AB81	Aamy domain-containing protein OS=Apis mellifera OX=7460 GN=AGLU-like2 PE=4 SV=1		0	FALSE	13.548	10	4	13	4	616	69.7	5.17	2.81	0	0	0		0	0	0		0						0					2	1	1	1		1	2	1		1
FALSE	High	Master Protein	A0A088AQB1	AB hydrolase-1 domain-containing protein OS=Apis mellifera OX=7460 GN=Hydr1 PE=4 SV=1		0.001	FALSE	3.896	4	1	1	1	393	44	7.85				2.05																				1
FALSE	High	Master Protein	A0A088ANJ8	AB hydrolase-1 domain-containing protein OS=Apis mellifera OX=7460 GN=LOC414038 PE=4 SV=1		0	FALSE	16.432	18	5	9	5	318	36	9.6		2.52	2.42								2.75	5.02					2.64	4.11	1.96			1	1								1	2
FALSE	High	Master Protein	A0A088A337	AB hydrolase-1 domain-containing protein OS=Apis mellifera OX=7460 GN=LOC552611 PE=4 SV=1		0	FALSE	4.357	4	1	1	1	388	43.8	7.55							2.56																				1
FALSE	High	Master Protein	A0A087ZYZ0	AB hydrolase-1 domain-containing protein OS=Apis mellifera OX=7460 PE=4 SV=1		0	FALSE	26.716	35	7	13	7	258	29.5	8.07			0					3.32	2.21					9.1									2					2	3					5
FALSE	High	Master Protein	A0A088A9Q3	AB hydrolase-1 domain-containing protein OS=Apis mellifera OX=7460 PE=4 SV=1		0	FALSE	8.259	5	2	4	2	506	57.1	6.64							2.03					0	3.03						1.66								1					1	1
FALSE	High	Master Protein	Q8WSY9	Abaecin (Fragment) OS=Apis mellifera OX=7460 PE=2 SV=1		0	FALSE	10.252	45	1	45	1	33	3.6	10.02	7.49	7.04	9.97	15.36	10.51	9.54	3.8	3.81	10.45	20.53		3.98	4.65	11.73	6.59			18.54			1	1	1	1	1	1	1	1	1	1		1	1	1
FALSE	High	Master Protein	A0A1B4XQC7	ABC transporter ATP-binding protein OS=Enterococcus faecalis OX=1351 GN=sufC PE=4 SV=1		0	FALSE	7.111	7	1	1	1	256	28.4	4.81														3.83																				1
FALSE	High	Master Protein	A0A093S6Z1	ABC transporter ATP-binding protein OS=Pectobacterium carotovorum subsp. carotovorum OX=555 GN=KP17_17460 PE=4 SV=1		0	FALSE	10.484	9	3	3	3	548	61.3	5.48																				6.12
FALSE	High	Master Protein	V5YW05	ABC transporter ATP-binding protein OS=Serratia marcescens OX=615 GN=lptB PE=4 SV=1		0	FALSE	8.832	14	2	2	2	241	26.7	6.33																				6.32
FALSE	High	Master Protein	A0A088AF57	ABC transporter domain-containing protein OS=Apis mellifera OX=7460 GN=LOC409666 PE=4 SV=1		0	FALSE	90.369	27	15	84	14	799	89.4	6.96	12.26	28.16	24.83	5.7	27.2	2.64	29.78	6.37	3.48	18.54	8.73	11.15	11.35			5.94	17.23	16.73		2.66	3	8	8	3	9	1	8	2	1	6	3	4	5
FALSE	High	Master Protein	A0A087ZSQ4	ABC transporter domain-containing protein OS=Apis mellifera OX=7460 GN=LOC413844 PE=4 SV=1		0.01	FALSE	2.133	2	1	1	1	820	91.4	8.48							0																				1
FALSE	High	Master Protein	A0A088AN63	ABC transporter domain-containing protein OS=Apis mellifera OX=7460 GN=LOC414051 PE=4 SV=1		0	FALSE	4.532	2	1	3	1	703	79.2	7.58		2.67			2.04		2.52															1			1		1
FALSE	High	Master Protein	A0A087ZSN8	ABC transporter domain-containing protein OS=Apis mellifera OX=7460 GN=LOC726513 PE=4 SV=1		0	FALSE	5.475	5	2	3	2	625	69.1	8.76				2	0		2.04																	1	1		1
FALSE	High	Master Protein	A0A087ZQY9	ABC transporter domain-containing protein OS=Apis mellifera OX=7460 PE=4 SV=1		0	FALSE	39.148	17	10	73	9	620	69.4	6.68	1.94	6.47	10.01	3.45	20.26		5.15		0	7.62	1.83	4.7	4.54		0	2.05	13.27	11.55	2.05		1	4	6	3	8		5		1	3	1	3	5
FALSE	High	Master Protein	A0A088A0M1	ABC transporter domain-containing protein OS=Apis mellifera OX=7460 PE=4 SV=1		0.002	FALSE	3.102	2	1	2	1	674	75.7	8.21		1.97					2.06															1					1
FALSE	High	Master Protein	A0A088A0P1	ABC transporter domain-containing protein OS=Apis mellifera OX=7460 PE=4 SV=1		0	FALSE	4.988	2	1	1	1	642	72.8	8.68																	2.15
FALSE	High	Master Protein	V5YUS5	ABC transporter OS=Serratia marcescens OX=615 GN=mlaC PE=4 SV=1		0	FALSE	8.328	15	3	3	3	209	23.5	9.39																				8.06
FALSE	High	Master Protein	A0A0P0Q8S3	ABC transporter substrate-binding protein OS=Serratia marcescens OX=615 GN=AR325_02675 PE=4 SV=1		0	FALSE	77.571	32	12	43	12	535	59.9	6.96									7.86					7.42						107.43									3					3
FALSE	High	Master Protein	A0A0M4R3H2	ABC transporter substrate-binding protein OS=Serratia marcescens OX=615 GN=opuBC PE=4 SV=1		0	FALSE	4.41	4	1	1	1	309	32.5	6.62																				2.38
FALSE	High	Master Protein	C5CCL3	ABC transporter, CydDC cysteine exporter (CydDC-E) family, permease/ATP-binding protein CydD OS=Micrococcus luteus (strain ATCC 4698 / DSM 20030 / JCM 1464 / NBRC 3333 / NCIMB 9278 / NCTC 2665 / VKM Ac-2230) OX=465515 GN=Mlut_13200 PE=4 SV=1		0.009	FALSE	2.232	1	1	8	1	1171	120.5	8.38											0					2	0	0	0												1
FALSE	High	Master Protein	A0A0U6H8J8	ABC-type protease/lipase transport system, ATPase and permease components OS=Serratia marcescens OX=615 GN=ERS381490_03532 PE=4 SV=1		0	FALSE	9.477	3	3	4	1	1001	101.1	4.82																				7.9
FALSE	High	Master Protein	A0A088AHK0	Abhydrolase_2 domain-containing protein OS=Apis mellifera OX=7460 GN=LOC409201 PE=4 SV=1		0	FALSE	43.13	47	8	31	8	219	23.8	7.53	2.72	2.09	2.32	4.3		5.56		2.33		6.72	2.37	12.2	2.13	1.63			12.76	7.28	3.17		1	1	1	2		2		1		2	2	5	1	2
FALSE	High	Master Protein	A0A087ZSM9	ACB domain-containing protein OS=Apis mellifera OX=7460 GN=LOC411272 PE=4 SV=1		0	FALSE	31.636	66	5	36	5	89	10	7.18		4.94			2	2.63			1.91	4.68	12.73	24.3		2.05		1.85	7.22	7.16	6.63			2			1	2			1	1	5	5		1
FALSE	High	Master Protein	A0A0G8BEZ5	Acetate kinase OS=Serratia marcescens OX=615 GN=ackA PE=3 SV=1		0.004	FALSE	2.716	4	1	1	1	400	43.1	6.29															2.71
FALSE	High	Master Protein	A0A0U8BN20	Acetolactate synthase OS=Serratia marcescens OX=615 GN=ilvI PE=3 SV=1		0.002	FALSE	3.242	2	1	1	1	572	62.4	6.09																				3.01
FALSE	High	Master Protein	V5YUX8	Acetyl-CoA carboxylase biotin carboxylase subunit OS=Serratia marcescens OX=615 GN=accC PE=4 SV=1		0	FALSE	17.771	14	4	8	4	449	49.5	6.8															0					15.68
FALSE	High	Master Protein	A0A088ADC5	AcetylCoA_hyd_C domain-containing protein OS=Apis mellifera OX=7460 PE=4 SV=1		0	FALSE	314.729	60	19	641	19	448	49.6	7.81	270.26	113.98	164.71	7.53	42	111.29	148.94	145.99	53.5	62.9	123.49	159.06	94.78	31.01		72.88	102.97	95.06	57.28		16	14	16	4	9	14	14	14	12	11	12	13	14	9
FALSE	High	Master Protein	A0A0U6BC73	Acetyl-coenzyme A carboxylase carboxyl transferase subunit alpha OS=Serratia marcescens OX=615 GN=accA PE=3 SV=1		0.004	FALSE	2.759	7	1	1	1	319	35.4	6.29																				2.17
FALSE	High	Master Protein	A0A093UPS2	Acetyl-coenzyme A synthetase OS=Pectobacterium carotovorum subsp. carotovorum OX=555 GN=acs PE=3 SV=1		0	FALSE	29.752	13	6	8	3	653	72.2	6.11									2.62					4.86						16.46									1					2
FALSE	High	Master Protein	A0A0G3SM13	Acetyl-coenzyme A synthetase OS=Serratia marcescens OX=615 GN=acs PE=3 SV=1		0	FALSE	58.292	26	12	18	9	652	71.9	6.27														11.28						43.95														4
FALSE	High	Master Protein	A0A0P0Q8D6	Acetylglutamate kinase OS=Serratia marcescens OX=615 GN=argB PE=3 SV=1		0	FALSE	5.14	5	1	1	1	257	26.6	6.1																				3.46
FALSE	High	Master Protein	A0A1Q5WAJ3	Acetylornithine/succinyldiaminopimelate aminotransferase OS=Serratia marcescens OX=615 GN=argD PE=3 SV=1		0	FALSE	21.981	19	4	4	4	404	43.1	6.52																				14.91
FALSE	High	Master Protein	A0A093SSQ8	Acetyltransferase component of pyruvate dehydrogenase complex OS=Pectobacterium carotovorum subsp. carotovorum OX=555 GN=aceF PE=3 SV=1		0	FALSE	17.796	8	4	10	1	628	65.6	5.24						1.61			1.96					1.78	0					15.59						1			1					1
FALSE	High	Master Protein	A0A1C3HIY2	Acetyltransferase component of pyruvate dehydrogenase complex OS=Serratia marcescens OX=615 GN=aceF PE=3 SV=1		0	FALSE	32.634	13	7	14	4	627	65.3	5.27						1.61			4.15					4.41	0					21.3						1			2					2
FALSE	High	Master Protein	A0A088ADU5	acidPPc domain-containing protein OS=Apis mellifera OX=7460 GN=LOC552437 PE=4 SV=1		0.002	FALSE	3.397	6	1	1	1	212	24.4	9		2.49																				1
FALSE	High	Master Protein	A0A088ASQ0	Aconitase domain-containing protein OS=Apis mellifera OX=7460 PE=4 SV=1		0	FALSE	15.294	10	3	5	1	397	43.2	5.44															2.04					9.71
FALSE	High	Master Protein	A0A093SSV0	Aconitate hydratase B OS=Pectobacterium carotovorum subsp. carotovorum OX=555 GN=KP17_07875 PE=3 SV=1		0	FALSE	47.793	13	9	22	1	887	95.9	5.25									2.9					11.11	11.23					37.7									1					4
FALSE	High	Master Protein	A0A0G3SPU3	Aconitate hydratase B OS=Serratia marcescens OX=615 GN=acnB PE=3 SV=1		0	FALSE	66.466	19	13	27	5	865	93.5	5.36									0					8.59	9.01					54.51									1					3
FALSE	High	Master Protein	A0A093T0Z7	Aconitate hydratase OS=Pectobacterium carotovorum subsp. carotovorum OX=555 GN=KP17_02655 PE=3 SV=1		0	FALSE	31.266	8	5	15	1	890	97.9	5.8									7.18					18.05						0									3					5
FALSE	High	Master Protein	A0A1C3HEB7	Aconitate hydratase OS=Serratia marcescens OX=615 GN=acnA PE=3 SV=1		0	FALSE	50.101	14	10	20	6	890	97.3	5.92									7.18	2.42				16.84						9.98									3	1				5
FALSE	High	Master Protein	A0A087ZXK3	Aconitate hydratase, mitochondrial OS=Apis mellifera OX=7460 GN=LOC408446 PE=3 SV=1		0	FALSE	594.352	58	46	1435	46	788	85.9	8.44	582.74	315.73	192.96	20.56	34.88	210.62	309.83	332.22	66.22	51.4	438.13	378.79	173.75	142.36		294.9	618.38	211.5	148.57		42	35	28	7	12	32	37	40	17	14	44	41	26	26
FALSE	High	Master Protein	O15560	Actin (Fragment) OS=Antonospora locustae OX=278021 GN=ACT1 PE=3 SV=1		0	FALSE	39.422	11	3	546	2	327	36.3	6.19	49.42	53.55	48.16	36.57	47.53	47.78	39.51	46.1	45.94	42.84	44.14	42.15	65.58	17.1	17.92	159.77	182.18	47.08	55.7	6.82	1	1	1	1	1	1	1	1	2	2	1	2	1	1
FALSE	High	Master Protein	L2GLN4	Actin CyI, cytoplasmic OS=Vittaforma corneae (strain ATCC 50505) OX=993615 GN=VICG_01260 PE=3 SV=1		0	FALSE	85.578	10	4	1193	1	372	41.5	6.1	110.96	130.33	94.25	106.69	80.59	131.42	115.15	126.61	107.48	90.03	116.62	114.86	130.45	50.73	33.95	201.97	353.57	197.05	201.2	8.32	3	3	3	3	2	2	3	3	3	4	2	3	3	3
FALSE	High	Master Protein	A0A088AJ79	Actin-related protein 2 OS=Apis mellifera OX=7460 GN=LOC409313 PE=3 SV=1		0	FALSE	13.856	9	3	13	3	406	46	6.47	4.8	3.13	2.47			0	2.67			2.42	3					0	3.12		0		2	1	2			1	1			1	2
FALSE	High	Master Protein	A0A087ZYS4	Actin-related protein 2/3 complex subunit 3 OS=Apis mellifera OX=7460 GN=Arpc3A PE=3 SV=1		0	FALSE	5.089	7	1	5	1	177	20.2	8.51	1.92										0	1.98		0		1.66					1										1	1		1
FALSE	High	Master Protein	A0A088A168	Actin-related protein 2/3 complex subunit 4 OS=Apis mellifera OX=7460 GN=Arpc4 PE=3 SV=1		0	FALSE	7.917	13	2	6	2	168	19.7	8.57	2.71	2.7	2.83		2.83											1.7	2.01				1	1	1		1
FALSE	High	Master Protein	A0A088A6E7	Actin-related protein 2/3 complex subunit 5 OS=Apis mellifera OX=7460 GN=p16-ARC PE=3 SV=1		0	FALSE	13.95	20	4	9	4	157	17.3	5.64						2.8					1.66	1.68	0				2.65	2.08								2					2	1	1
FALSE	High	Master Protein	A0A088A9T8	Actin-related protein 2/3 complex subunit OS=Apis mellifera OX=7460 GN=Sop2 PE=3 SV=1		0	FALSE	8.542	8	3	5	3	368	41	7.46	2.2	1.86									4.16	2.06									1	1									2	1
FALSE	High	Master Protein	A0A088AVR3	Acyl carrier protein OS=Apis mellifera OX=7460 PE=3 SV=1		0	FALSE	35.132	31	7	136	7	187	21.5	8.43	20.58	18.1	15.85	13.99	13.21	18.11	11.35	20.29	17.34	18.22	15.56	24.61	6.86	11.92	7.08	10.9	29.96	9.07	13.83	1.79	4	4	5	3	4	6	3	6	5	4	5	6	1	4
FALSE	High	Master Protein	A0A080V417	Acyl carrier protein OS=Serratia marcescens OX=615 GN=acpP PE=3 SV=1		0	FALSE	11.254	33	3	9	3	78	8.7	3.95														1.97						17.54														1
FALSE	High	Master Protein	A0A093S6H5	Acyl-CoA dehydrogenase OS=Pectobacterium carotovorum subsp. carotovorum OX=555 GN=fadE PE=4 SV=1		0	FALSE	15.198	5	3	10	1	815	89.1	7.15																				32.17
FALSE	High	Master Protein	A0A0P0QB24	Acyl-CoA dehydrogenase OS=Serratia marcescens OX=615 GN=fadE PE=4 SV=1		0	FALSE	79.752	27	14	38	12	818	89.3	8.24																				111.56
FALSE	High	Master Protein	A0A087ZVT1	Acyl-coenzyme A oxidase OS=Apis mellifera OX=7460 GN=LOC412020 PE=3 SV=1		0.002	FALSE	3.41	3	1	3	1	676	77	7.8		2.24									1.89	2.02										1									1	1
FALSE	High	Master Protein	A0A088ARZ1	Acyl-coenzyme A oxidase OS=Apis mellifera OX=7460 PE=3 SV=1		0	FALSE	52.085	15	7	26	7	663	75	7.46	9.11	13.11	6.28			2.33		2.39			17.04		2.61			0	4.54	3.29	9.61		3	4	2			1		1			5		1
FALSE	High	Master Protein	A0A088AR49	AD domain-containing protein OS=Apis mellifera OX=7460 PE=4 SV=1		0	FALSE	4.311	8	1	1	1	198	21.8	8.63																			0
FALSE	High	Master Protein	A0A087ZTP2	ADAM_spacer1 domain-containing protein OS=Apis mellifera OX=7460 PE=4 SV=1		0.004	FALSE	2.798	1	1	1	1	843	92.9	8.38											0																				1
FALSE	High	Master Protein	A0A088A1B6	Adenosylhomocysteinase OS=Apis mellifera OX=7460 GN=LOC408368 PE=3 SV=1		0	FALSE	17.713	17	6	12	6	433	47.9	7.28		0	0		3.19	0		0		3.47	5.43	3.62					0					1	1		1	1		1		2	2	2
FALSE	High	Master Protein	A0A087ZTP9	Adenosylhomocysteinase OS=Apis mellifera OX=7460 GN=LOC551762 PE=3 SV=1		0	FALSE	22.636	14	6	13	6	532	58.6	7.24	0	3.74									8.11	10.93		0			2.05				1	2									3	5		1
FALSE	High	Master Protein	A0A1B1SJC3	Adenylate kinase (Fragment) OS=Serratia marcescens OX=615 GN=adk PE=3 SV=1		0	FALSE	13.835	20	3	58	2	166	18.6	5.31	6.76	4.08	6.08	6.21	3.92	5.67	5.7	6.15	5.71	4.79	6.35	6.44	3.97	7.76	6.43	5.59	4.38			23.3	1	1	1	1	1	1	1	1	1	1	1	1	1	2
FALSE	High	Master Protein	A0A0B4J2L5	Adenylate kinase OS=Apis mellifera OX=7460 GN=Adk2 PE=3 SV=1		0	FALSE	118.182	67	17	224	16	252	28.5	8.05	54	57.98	52.66	15.73	17.5	33.48	29.15	42.1	20.23	10.99	43.62	58.24	19.98	14.26	4.1	19.26	25.18	16.98	19.52		12	13	11	5	6	8	6	10	5	2	8	11	4	4
FALSE	High	Master Protein	A0A087ZXK2	Adenylosuccinate lyase OS=Apis mellifera OX=7460 PE=3 SV=1		0.01	FALSE	2.193	3	1	1	1	420	47.2	6.61												2.05																				1
FALSE	High	Master Protein	A0A221FND4	Adenylosuccinate lyase OS=Serratia marcescens OX=615 GN=BVG93_07065 PE=3 SV=1		0	FALSE	7.481	7	2	2	2	456	51.4	6.15										0										3.6										1
FALSE	High	Master Protein	A0A087ZXT6	Adenylosuccinate synthetase OS=Apis mellifera OX=7460 GN=LOC409299 PE=3 SV=1		0	FALSE	40.984	13	5	25	5	449	49.3	8.12	5.88	3.14	4.74			2.33	2.64				18.74	22.64	5.43						5.56		1	1	1			1	1				4	3	1
FALSE	High	Master Protein	A0A093S6A1	Adenylosuccinate synthetase OS=Pectobacterium carotovorum subsp. carotovorum OX=555 GN=purA PE=3 SV=1		0	FALSE	23.531	17	6	14	6	432	47	5.88					2.89				4.89					0	4.42					18.75					1				2					1
FALSE	High	Master Protein	A0A087ZPC0	Adenylyl cyclase-associated protein OS=Apis mellifera OX=7460 GN=LOC410158 PE=4 SV=1		0	FALSE	78.772	29	14	52	14	767	85.1	5.36	16.83	3.45	2.94			8.07	3.07	2.29			30.75	17.41		4.87		11.1	15.03		9.8		5	2	2			3	1	1			9	7		3
FALSE	High	Master Protein	A0A088AUH4	ADF-H domain-containing protein OS=Apis mellifera OX=7460 GN=LOC725718 PE=3 SV=1		0	FALSE	57.212	57	7	55	7	148	16.8	6.57	8.03	3.08	2.65	2.48	2.6	18.84				9.63	18.88	20.56	9.92	7.62	1.74	6.87	14.13	6.69	16.77		3	1	1	1	1	5				2	5	4	2	2
FALSE	High	Master Protein	Q6VQ13	ADP/ATP translocase OS=Apis mellifera OX=7460 GN=Ant PE=2 SV=1		0	FALSE	312.109	83	27	2997	27	300	33	9.69	418.85	347.93	296.75	302.57	315.65	225.21	305.35	233.37	267.9	271.88	248.64	222.23	266.24	163.38	136.48	208.05	729.39	621.92	552.39	202.59	21	19	21	21	22	18	20	21	22	22	18	19	18	18
FALSE	High	Master Protein	A0A221HF92	ADP-L-glycero-D-manno-heptose-6-epimerase OS=Serratia marcescens OX=615 GN=hldD PE=3 SV=1		0	FALSE	4.582	6	2	2	2	309	34.7	4.96																				4.08
FALSE	High	Master Protein	A0A088AJL2	Aha1_N domain-containing protein OS=Apis mellifera OX=7460 GN=LOC551720 PE=4 SV=1		0	FALSE	6.142	5	1	3	1	338	39.1	5.97	2.98										3.84	3.91									1										1	1
FALSE	High	Master Protein	A0A087ZSV1	AIP3 domain-containing protein OS=Apis mellifera OX=7460 PE=4 SV=1		0	FALSE	5.316	4	1	2	1	392	42.2	7.3	3.18						3.96														1						1
FALSE	High	Master Protein	A0A087ZSV2	AIP3 domain-containing protein OS=Apis mellifera OX=7460 PE=4 SV=1		0	FALSE	30.733	11	5	22	5	577	63.1	9.04	6.83	2.23			0		8.16	2.44	0		2.84	2.86	0			0	6.31	2.71			2	1			1		2	1	1		1	2	1
FALSE	High	Master Protein	A0A088AL04	AIRC domain-containing protein OS=Apis mellifera OX=7460 GN=ade5 PE=3 SV=1		0	FALSE	28.296	16	5	7	5	420	47.2	7.43											2.41					0		3.57	4.57												1
FALSE	High	Master Protein	A0A088ASE6	AKAP2_C domain-containing protein OS=Apis mellifera OX=7460 GN=LOC409057 PE=4 SV=1		0	FALSE	4.867	11	2	2	2	293	33.2	9.22						0						2.47														1						1
FALSE	High	Master Protein	A0A093V4I6	Alanine--tRNA ligase OS=Pectobacterium carotovorum subsp. carotovorum OX=555 GN=alaS PE=3 SV=1		0	FALSE	12.5	5	3	3	3	875	95.9	5.68															2.3					5.76
FALSE	High	Master Protein	A0A2I2C0H1	Alcohol dehydrogenase AdhP OS=Enterococcus faecalis OX=1351 GN=CYR78_02525 PE=4 SV=1		0.009	FALSE	2.276	3	1	1	1	338	35.9	5.87															1.94
FALSE	High	Master Protein	A0A1Q4P5K5	Alcohol dehydrogenase AdhP OS=Serratia marcescens OX=615 GN=BHU62_02715 PE=3 SV=1		0	FALSE	23.256	14	3	10	3	338	35.4	6.64															0					28.59
FALSE	High	Master Protein	A0A088ACS2	Aldedh domain-containing protein OS=Apis mellifera OX=7460 GN=Aldh PE=3 SV=1		0	FALSE	259	76	28	420	28	510	55.7	7.14	166.58	36.93	68.88	15.96	13.65	108.68	39.26	51.08	22.51	2.68	107.77	62.3	39.31	47.76		80.17	75.8	77.54	135.64		26	7	14	6	3	22	9	11	7	1	19	12	8	12
FALSE	High	Master Protein	A0A087ZNH4	Aldedh domain-containing protein OS=Apis mellifera OX=7460 GN=LOC409736 PE=4 SV=1		0	FALSE	119.412	46	17	103	17	520	56	8.03	46.54	9.9	19.68			14.59	13.92	20.73	4.29		47.16	33.49	9.66	24.32		4.55	10.42	10.64	26		10	2	5			3	3	4	2		11	7	3	5
FALSE	High	Master Protein	A0A088AVE3	Aldedh domain-containing protein OS=Apis mellifera OX=7460 GN=LOC411140 PE=3 SV=1		0	FALSE	23.056	9	3	5	3	527	56.6	8.1																			11.97
FALSE	High	Master Protein	A0A088AAD1	Aldedh domain-containing protein OS=Apis mellifera OX=7460 GN=Ssadh PE=4 SV=1		0	FALSE	207.904	58	27	377	27	503	55.6	8.4	135.6	67.63	104.48	12.39	11.75	55.94	88.62	104.28	64.54	12.01	113.54	79.35	75.78	61.9		38.05	36.4	41.8	23.88		22	14	19	6	5	11	15	16	15	4	16	14	13	16
FALSE	High	Master Protein	A0A088AID7	Aldedh domain-containing protein OS=Apis mellifera OX=7460 PE=3 SV=1		0	FALSE	54.264	28	9	26	8	487	52.9	5.8	9.59		2.49					2.68	0		15.93	10.11		7.81			5.83		8.27		3		1					2	1		6	4		3
FALSE	High	Master Protein	A0A088ANX1	Aldehyde dehydrogenase OS=Apis mellifera OX=7460 PE=3 SV=1		0	FALSE	49.184	21	9	75	9	551	62.3	7.33	22.87	10.46	15.37	2.1	6.8	8.92	16.34	7.32	4.05	13.53	7.99	5.68	9.18	2.19	5.83	0	2.75	3.22	2.8		7	5	6	2	3	4	4	4	2	4	3	2	5	2
FALSE	High	Master Protein	A0A093SUJ9	Aldehyde dehydrogenase OS=Pectobacterium carotovorum subsp. carotovorum OX=555 GN=KP17_07020 PE=3 SV=1		0	FALSE	4.295	4	2	2	1	479	51.8	5.77														1.92						0														1
FALSE	High	Master Protein	A0A0N7JPP4	Aldehyde dehydrogenase OS=Serratia marcescens OX=615 GN=AR325_14910 PE=3 SV=1		0	FALSE	26.909	17	6	10	6	506	55.2	5.76														4.91						24.01														1
FALSE	High	Master Protein	A0A093SLF0	Aldehyde-alcohol dehydrogenase OS=Pectobacterium carotovorum subsp. carotovorum OX=555 GN=KP17_17235 PE=3 SV=1		0	FALSE	51.069	13	8	18	2	891	96.6	6.95									5.68					5.08	12.42					27.01									2					2
FALSE	High	Master Protein	A0A221FQC5	Aldehyde-alcohol dehydrogenase OS=Serratia marcescens OX=615 GN=BVG93_10820 PE=3 SV=1		0	FALSE	77.126	22	13	27	7	890	96.2	6.93	2.28								5.68					7.06	11.09					53.34	1								2					3
FALSE	High	Master Protein	A0A2G4P227	Aldo/keto reductase OS=Serratia marcescens OX=615 GN=CS368_18290 PE=4 SV=1		0	FALSE	6.009	7	2	2	2	324	36.2	5.14																				5.27
FALSE	High	Master Protein	A0A087ZZ66	Aldo_ket_red domain-containing protein OS=Apis mellifera OX=7460 GN=LOC411202 PE=4 SV=1		0	FALSE	10.453	15	3	4	3	321	37.2	7.87	0										2.04	0									1										2	1
FALSE	High	Master Protein	A0A088AGI6	Aldo_ket_red domain-containing protein OS=Apis mellifera OX=7460 GN=LOC412163 PE=4 SV=1		0	FALSE	27.966	27	7	24	6	311	35.2	7.87			2.8			7.83			0		11.25	11.72		7.61		2.68			11.64				1			3			1		4	4		3
FALSE	High	Master Protein	A0A088AGI8	Aldo_ket_red domain-containing protein OS=Apis mellifera OX=7460 GN=LOC551968 PE=4 SV=1		0	FALSE	115.4	76	19	119	19	318	36.1	6.73	21.8	0	3.79	0		12.25				5.12	47.04	42.26	0	34.2		8.8	5.33	6.74	48.91	0	8	2	2	1		7				2	10	10	1	13
FALSE	High	Master Protein	A0A088AGI5	Aldo_ket_red domain-containing protein OS=Apis mellifera OX=7460 PE=4 SV=1		0	FALSE	106.94	64	17	148	16	318	36.4	7.09	46.9	9.08	0	0	4.21	26.24	4.97	1.92	6.96	7.94	76.06	50.57	16.29	12.67		33.27	16.69	7.63	41.3		13	2	1	1	2	8	2	2	4	4	14	11	5	5
FALSE	High	Master Protein	A0A1Q4NW42	Aldolase OS=Serratia marcescens OX=615 GN=BHU62_19415 PE=4 SV=1		0	FALSE	10.835	12	3	4	3	280	30.5	6.73																				9.61
FALSE	High	Master Protein	A0A088AEU8	Aldolase_II domain-containing protein OS=Apis mellifera OX=7460 GN=LOC409713 PE=4 SV=1		0	FALSE	319.668	31	33	499	33	1325	150.9	5.08	112.45	171.93	62.99	50.7	59.88	120.05	185.76	65.96	27.16	33.38	97.88	99	78.27	34.89	19.39	33.37	120.26	84.3	36.14	2.02	17	24	11	12	10	21	25	14	7	5	18	16	17	10
FALSE	High	Master Protein	A0A0G8BEF9	Alkanesulfonate monooxygenase OS=Serratia marcescens OX=615 GN=ssuD PE=3 SV=1		0	FALSE	4.467	4	1	1	1	382	41.8	6.48															2.36
FALSE	High	Master Protein	A0A093SCL2	Alkyl hydroperoxide reductase OS=Pectobacterium carotovorum subsp. carotovorum OX=555 GN=KP17_18020 PE=4 SV=1		0	FALSE	45.751	34	6	52	5	187	20.8	5.26	4.18			6.57	21.66	4.05			24.04		9.16			25.79	24.39				0	29.64	1			2	3	2			4		1			4
FALSE	High	Master Protein	A0A088A8P3	Alkylglycerone-phosphate synthase OS=Apis mellifera OX=7460 PE=3 SV=1		0	FALSE	3.968	3	1	1	1	562	63.3	8.09							4.31																				1
FALSE	High	Master Protein	P83563	Allergen Api m 6.03 / Api m 6.04 OS=Apis mellifera OX=7460 PE=1 SV=2		0	FALSE	15.572	36	4	10	4	92	9.8	9.69										12.51					0															4
FALSE	High	Master Protein	A0A1Q5W9M2	Alpha/beta hydrolase OS=Serratia marcescens OX=615 GN=A8A12_00250 PE=4 SV=1		0	FALSE	17.972	18	3	6	3	276	30.4	6.8																				14.79
FALSE	High	Master Protein	A0A087ZVF4	Alpha-1,4 glucan phosphorylase OS=Apis mellifera OX=7460 GN=GlyP PE=3 SV=1		0	FALSE	60.903	20	14	28	14	844	97.3	6.37										3.93	13.19	15.2				7.79	3.61	2	14.94											1	4	5
FALSE	High	Master Protein	A0A088ATP0	Alpha-carbonic anhydrase domain-containing protein OS=Apis mellifera OX=7460 GN=727237 PE=3 SV=1		0	FALSE	8.424	6	1	3	1	343	38.6	5.35	3.05										2.51	2.55									1										1	1
FALSE	High	Master Protein	A0A088A5W1	Alpha-carbonic anhydrase domain-containing protein OS=Apis mellifera OX=7460 GN=CAH1 PE=3 SV=1		0	FALSE	20.122	13	3	19	3	273	30.7	6.65	5.11					8.29		2			9.33	9.4	3.27			1.82	3.01	3.03	8.32		1					2		1			2	2	1
FALSE	High	Master Protein	A0A088A332	Alpha-galactosidase OS=Apis mellifera OX=7460 PE=3 SV=1		0	FALSE	8.669	6	2	2	2	388	44.6	5.3																1.68	3.08
FALSE	High	Master Protein	Q25BT8	Alpha-glucosidase OS=Apis mellifera OX=7460 GN=hbg1 PE=4 SV=1		0	FALSE	88.593	37	20	60	20	588	67.3	6.61			2.02		7.71	37.71			4.38				16.13	8.42	2.55		0			17.11			3		4	14			3				7	6
FALSE	High	Master Protein	Q25BT7	Alpha-glucosidase OS=Apis mellifera OX=7460 GN=hbg2 PE=4 SV=1		0	FALSE	44.051	22	9	34	9	580	66.5	6.28			2.2	0	3.76	16.64			6.58		4.7		11.83	1.99	0	30.58			0	2.55			1	1	1	5			3		1		3	1
FALSE	High	Master Protein	A0A0G3STP4	Alpha-ketoglutarate-dependent taurine dioxygenase OS=Serratia marcescens OX=615 GN=tauD PE=4 SV=1		0.002	FALSE	3.154	4	1	1	1	282	32.2	6.52															2.53
FALSE	High	Master Protein	A0A0F9WMK1	Alpha-l-fucosidase OS=Nosema ceranae OX=40302 GN=AAJ76_8700010241 PE=4 SV=1		0.002	FALSE	3.36	8	1	1	1	144	15.6	5.81															2.17
FALSE	High	Master Protein	A0A088APY3	Amidase domain-containing protein OS=Apis mellifera OX=7460 GN=LOC408742 PE=4 SV=1		0	FALSE	144.445	54	19	200	19	536	60.1	8.76	19.21	94.54	21.03	10	43.27	18.77	68.55	9.95	2.5	11.53	35.94	43.59	31.31	5.58	4.88	20.54	17.89	36.4	31.95	0	5	15	5	3	10	6	14	2	2	3	9	8	10	4
FALSE	High	Master Protein	A0A088A8Y7	Amidase domain-containing protein OS=Apis mellifera OX=7460 PE=4 SV=1		0	FALSE	42.506	21	8	25	8	540	60.9	7.93	2.61	3.13	7.93		2.17	0	5.88			6.73	5.91	3.31	4.54			2.12	10.08	5.73	3.94		1	1	2		1	1	2			2	2	1	1
FALSE	High	Master Protein	A0A088ALH3	Amidohydro-rel domain-containing protein OS=Apis mellifera OX=7460 PE=4 SV=1		0	FALSE	55.186	22	10	16	10	688	74.9	6.23					2.12					4.06	8.19	9.42				1.7	10.99	1.77	6.67						1					2	3	2
FALSE	High	Master Protein	A0A2G4P2S9	Amino acid ABC transporter ATP-binding protein OS=Serratia marcescens OX=615 GN=artP PE=4 SV=1		0	FALSE	18.086	12	2	5	2	241	26.7	7.91														2.65						12.81														1
FALSE	High	Master Protein	A0A1Y0LXD4	Amino acid ABC transporter permease OS=Enterococcus faecalis OX=1351 GN=A6B47_01590 PE=3 SV=1		0.008	FALSE	2.362	3	1	1	1	527	57.5	6.46			2.31																				1
FALSE	High	Master Protein	A0A0M4QKK4	Amino acid ABC transporter permease OS=Serratia marcescens OX=615 GN=yecS_3 PE=3 SV=1		0	FALSE	4.644	8	1	1	1	246	27.3	8.91																				2.71
FALSE	High	Master Protein	A0A0G8BDU3	Amino acid ABC transporter substrate-binding protein OS=Serratia marcescens OX=615 GN=BVG93_04190 PE=3 SV=1		0	FALSE	35.208	38	6	11	6	247	27	8.78									5.11					1.81	0					22.74									2					1
FALSE	High	Master Protein	A0A088A150	Amino acid transporter OS=Apis mellifera OX=7460 GN=LOC409919 PE=3 SV=1		0	FALSE	43.432	13	5	80	5	503	54.6	6.65	12.91	30.61	16.29	5.82	13.98	8.85	40.88	12.62	4.13	13.21	12.3	21.58	19.23	3.57	6.17	3.95	3.92	1.67	0		2	3	3	2	2	2	4	3	2	1	3	3	3	1
FALSE	High	Master Protein	A0A088A624	Amino acid transporter OS=Apis mellifera OX=7460 PE=3 SV=1		0	FALSE	60.355	21	8	69	8	486	52.9	6.57		3.66	11.24	3.79	8.8	5.4	11.53	23.55	27.49	31.97	3.21	8.54	6.71	11.33	8.26	4.16	5.14	8.83	3.54	10.24		1	5	2	3	2	2	4	4	5	1	2	2	4
FALSE	High	Master Protein	A0A221FKT4	Aminoacyl-histidine dipeptidase OS=Serratia marcescens OX=615 GN=BVG93_01250 PE=4 SV=1		0.002	FALSE	3.678	4	2	2	2	486	52.4	5.35																				3.92
FALSE	High	Master Protein	A0A087ZSE6	Aminomethyltransferase OS=Apis mellifera OX=7460 GN=LOC410550 PE=3 SV=1		0	FALSE	29.464	17	6	15	6	455	49.6	9.42	5.35		5.65			0					2.24	0		11.61					2.08		2		2			1					1	1		5
FALSE	High	Master Protein	A0A2G4QCP2	Aminopeptidase N OS=Serratia marcescens OX=615 GN=CS371_12130 PE=4 SV=1		0	FALSE	11.769	5	4	4	4	872	98.1	5.38														0						9.38														1
FALSE	High	Master Protein	A0A087ZUG8	Aminopeptidase OS=Apis mellifera OX=7460 GN=LOC412808 PE=3 SV=1		0	FALSE	268.245	46	34	275	33	982	112.4	7.15	52.61	10.92	39.58	76.17	5.05	87.09	14.44	2.41	22.18		79.26	12.36	80.1	3.14	7.82	13.96	10	6.17	131.91	15.46	17	5	11	21	3	22	5	1	12		17	4	19	1
FALSE	High	Master Protein	A0A087ZUB3	Aminopeptidase OS=Apis mellifera OX=7460 GN=LOC551180 PE=3 SV=1		0	FALSE	186.519	38	29	190	28	928	108	6.76	4.27		31.65	2.97	33.76	109.95			13.66		5.02		45.13	15.8	26.56	5.62		6.17	8.9	115.63	2		12	1	14	25			7		2		17	11
FALSE	High	Master Protein	A0A087ZTK0	Aminopeptidase OS=Apis mellifera OX=7460 GN=Psa PE=3 SV=1		0	FALSE	136.126	36	22	83	22	867	98.5	5.54	40.08					8.9		1.73			65.46	34.65	2.34			17.44	14.02	7.78	22.21		13					4		1			18	8	1
FALSE	High	Master Protein	A0A087ZWR8	Aminopeptidase OS=Apis mellifera OX=7460 PE=3 SV=1		0	FALSE	8.283	4	2	4	2	971	111.2	5.2							0						4.79														1						2
FALSE	High	Master Protein	A0A087ZNZ2	Aminotran_1_2 domain-containing protein OS=Apis mellifera OX=7460 GN=LOC409196 PE=4 SV=1		0	FALSE	240.108	63	30	486	30	543	60.8	8.32	131.78	52.68	56.99	7.43	7.83	83.06	43.47	77.06	20.17	10.29	147.5	85.78	66.05	62.97		111.9	53.89	54.66	143.62	0	24	14	13	3	5	21	11	19	8	5	25	19	14	17
FALSE	High	Master Protein	A0A087ZMX6	Aminotran_5 domain-containing protein OS=Apis mellifera OX=7460 GN=LOC410039 PE=3 SV=1		0	FALSE	41.922	27	9	24	9	448	49.9	8.24	5.81	3.3	2.06			4.56		2.93			0	3.99					12.26	2.99	0		2	1	1			4		1			2	4
FALSE	High	Master Protein	A0A088ADX3	Aminotran_5 domain-containing protein OS=Apis mellifera OX=7460 GN=LOC412670 PE=3 SV=1		0.002	FALSE	3.325	3	1	4	1	371	41.4	8.15						2.52					2.6						2.32		2.29							1					1
FALSE	High	Master Protein	A0A093VEP8	Aminotransferase OS=Pectobacterium carotovorum subsp. carotovorum OX=555 GN=KP17_03165 PE=3 SV=1		0	FALSE	6.691	7	3	8	1	396	43.1	5.35											1.85	3.64					1.94		4.15	4.85											1	1
FALSE	High	Master Protein	A0A221HBQ5	Aminotransferase OS=Serratia marcescens OX=615 GN=BVG84_14375 PE=4 SV=1		0	FALSE	17.754	14	5	7	5	404	45.1	6.11					0				0						0					10.46					1				1
FALSE	High	Master Protein	A0A1L6QU81	Aminotransferase OS=Serratia marcescens OX=615 GN=BVG97_05760 PE=3 SV=1		0	FALSE	11.892	8	3	8	1	396	43.2	6.06											1.85	3.64					1.94		4.15	6.16											1	1
FALSE	High	Master Protein	A0A088A2C1	AMP_N domain-containing protein OS=Apis mellifera OX=7460 PE=4 SV=1		0	FALSE	7.918	18	2	2	2	160	18.5	5.19	2.91										0										1										1
FALSE	High	Master Protein	A0A088A846	AMP-binding domain-containing protein OS=Apis mellifera OX=7460 GN=410988 PE=4 SV=1		0.006	FALSE	2.487	2	1	1	1	446	49.9	9.66										2.77																				1
FALSE	High	Master Protein	A0A088AJ72	AMP-binding domain-containing protein OS=Apis mellifera OX=7460 GN=bgm PE=4 SV=1		0	FALSE	47.53	17	9	29	9	687	76.9	7.36		19.31	4.6		2.24		1.61			3.97		1.77	1.88	0	0		5.8	2.17				6	3		2		2			2		1	1	1
FALSE	High	Master Protein	A0A087ZV52	AMP-binding domain-containing protein OS=Apis mellifera OX=7460 GN=LOC409515 PE=4 SV=1		0	FALSE	121.058	32	19	168	19	715	80.8	8.32	21.02	41.82	20.11	3.41	12.6	8.84	40.16	18.03	0	19.25	22.23	23.32	21.36	0	0	18.37	47.16	23	18.38		9	13	9	3	7	4	11	7	2	6	9	10	9	1
FALSE	High	Master Protein	A0A087ZYX1	AMPKBI domain-containing protein OS=Apis mellifera OX=7460 GN=alc PE=4 SV=1		0	FALSE	16.153	12	2	23	2	283	31.8	7.25	8.37	9.57	5		2.56	0	9.97		2.35		4.8	6.27	6.07	0		0					2	2	1		1	1	2		1		1	1	1	1
FALSE	High	Master Protein	Q4PKR8	Anarchy 1 OS=Apis mellifera OX=7460 PE=2 SV=1		0	FALSE	8.82	4	2	2	2	495	55.6	6.54												3.04					1.78															1
FALSE	High	Master Protein	A0A087ZRC1	Angiotensin-converting enzyme OS=Apis mellifera OX=7460 PE=3 SV=1		0	FALSE	20.173	14	6	8	6	621	72.6	5.97											3	14.62					2.55														1	5
FALSE	High	Master Protein	A0A2G4P5E8	Anhydro-N-acetylmuramic acid kinase OS=Serratia marcescens OX=615 GN=anmK PE=3 SV=1		0.004	FALSE	2.944	5	1	21	1	373	39.6	5.5	0	1.71	0		2.05	0	1.71	1.76	1.69	0	0		1.62		0						1	1	1		1	1	1	1	1	1	1		1
FALSE	High	Master Protein	A0A087ZTR6	Anion exchange protein OS=Apis mellifera OX=7460 GN=LOC409792 PE=3 SV=1		0	FALSE	65.231	13	12	26	12	1281	142.7	6.46	12.02	18.76					8.88	2.79		2.67	3.21	0				2.66	12.1	3.55			5	6					3	1		1	1	1
FALSE	High	Master Protein	A0A088APR9	ANK_REP_REGION domain-containing protein OS=Apis mellifera OX=7460 GN=LOC551350 PE=4 SV=1		0	FALSE	15.08	28	2	7	2	124	13.8	5.3						2.28						6.44					0		6.59							1						2
FALSE	High	Master Protein	A0A088AJG3	ANK_REP_REGION domain-containing protein OS=Apis mellifera OX=7460 GN=LOC551954 PE=4 SV=1		0	FALSE	4.279	19	2	3	2	226	24.8	5.9	2.12	0									2.01										1	1									1
FALSE	High	Master Protein	A0A088ANW7	ANK_REP_REGION domain-containing protein OS=Apis mellifera OX=7460 PE=3 SV=1		0	FALSE	29.506	18	8	15	8	628	71.5	6.11	7.3	2.2				4.03	4.2				2.78	0				2.44					3	2				3	2				2	1
FALSE	High	Master Protein	A0A088AVK8	ANK_REP_REGION domain-containing protein OS=Apis mellifera OX=7460 PE=4 SV=1		0.01	FALSE	2.198	4	1	3	1	273	29.2	6.74	0										1.65						0				1										1
FALSE	High	Master Protein	A0A088A1W4	Annexin OS=Apis mellifera OX=7460 GN=LOC409068 PE=3 SV=1		0	FALSE	70.884	27	13	80	13	508	56.5	5.55	19.08	13.4	6.22	2.17	6.31	7.5		0		4.04	18.08	16.99	12.98	4.36		8.41	13.18	11.85	19.18		7	4	3	2	4	4		1		2	6	5	5	2
FALSE	High	Master Protein	A0A088AJH1	Annexin OS=Apis mellifera OX=7460 GN=LOC409533 PE=3 SV=1		0	FALSE	296.715	77	26	444	25	323	35.9	4.74	173.2	26.84	19.25	17.77	19.32	102.2	9.36	16.72	9.04	44.37	178.66	143.02	55.09	21.32	1.98	158.1	147.29	29.33	105.89	2.65	20	6	7	5	5	19	3	6	2	9	21	20	14	6
FALSE	High	Master Protein	A0A087ZR92	Annexin OS=Apis mellifera OX=7460 PE=3 SV=1		0	FALSE	204.198	63	21	290	20	323	35.7	5.48	47.9	86.31	31.68	18.68	43.5	31.77	0	2.52	2.66	25.83	60.02	77.61	18.21	5.63	4.88	30.52	108.32	55.4	25.7	0	12	14	8	7	11	9	2	2	2	7	12	14	5	4
FALSE	High	Master Protein	Q8I6X7	Antennal-specific protein 3c OS=Apis mellifera OX=7460 GN=ASP3c PE=2 SV=1		0	FALSE	67.922	55	8	262	8	130	14.9	7.68	40.71	19.53	16.06	15.57	11.74	33.86	1.64	3.7	33.68	8.07	24.77	37.05	16.64	17.54	0	5.6	99.02	19.22	137.14		7	5	4	4	4	4	2	3	4	4	4	5	4	4
FALSE	High	Master Protein	A0A2G4QEH3	Anthranilate synthase component 1 OS=Serratia marcescens OX=615 GN=CS371_06180 PE=3 SV=1		0	FALSE	4.019	3	1	2	1	520	57.1	5.48																				2.24
FALSE	High	Master Protein	A0A1Q4P5X2	Antibiotic biosynthesis monooxygenase OS=Serratia marcescens OX=615 GN=BHU62_00180 PE=4 SV=1		0	FALSE	5.68	26	2	3	2	95	10.8	6.15					2.18										0					2.32					1
FALSE	High	Master Protein	A0A088AH86	AP complex subunit beta OS=Apis mellifera OX=7460 PE=3 SV=1		0	FALSE	70.839	25	16	52	16	918	101.3	5.27	13.08	15.26	1.89	1.92		8.76	9.89				16.06	25.65	5.46	0		2	5.45		1.87		4	5	2	1		4	5				6	6	2	1
FALSE	High	Master Protein	A0A088AG11	AP complex subunit sigma OS=Apis mellifera OX=7460 PE=3 SV=1		0.004	FALSE	2.721	8	1	5	1	111	13.3	8.98	2.27	1.85	2.08									2.3		1.81							1	1	1									1		1
FALSE	High	Master Protein	A0A088A893	AP_endonuc_2 domain-containing protein OS=Apis mellifera OX=7460 PE=4 SV=1		0	FALSE	12.284	14	2	2	2	156	18	6.38																			5
FALSE	High	Master Protein	A0A088ACY2	AP-1 complex subunit gamma OS=Apis mellifera OX=7460 PE=3 SV=1		0	FALSE	7.499	3	2	2	2	809	90.2	7.96											3.98			0																	1			1
FALSE	High	Master Protein	A0A088APJ2	AP-2 complex subunit alpha OS=Apis mellifera OX=7460 GN=alpha-Adaptin PE=3 SV=1		0	FALSE	35.482	12	9	28	9	937	104.9	7.21	4.89	12.02	2.63		3.08		3.47			5.42	2.2	4.22				1.97	11.54	2.17	3.94		2	3	1		1		1			2	1	2
FALSE	High	Master Protein	A0A088A8Q2	AP-3 complex subunit beta OS=Apis mellifera OX=7460 GN=LOC552064 PE=3 SV=1		0.002	FALSE	3.263	1	1	3	1	1049	117.6	6.32	0										1.94	0									1										1	1
FALSE	High	Master Protein	A0A088AFU6	ApaG domain-containing protein OS=Apis mellifera OX=7460 PE=4 SV=1		0.006	FALSE	2.573	3	1	2	1	313	36.3	8.9		2.32	1.83																			1	1
FALSE	High	Master Protein	P01500	Apamin OS=Apis mellifera OX=7460 PE=1 SV=2		0	FALSE	6.614	20	1	6	1	46	5.2	8.4										11.33																				1
FALSE	High	Master Protein	A0A088ANC5	APD-3-like protein; Apidermin 1-like protein; Apidermin 3-like protein OS=Apis mellifera OX=7460 GN=apd-3 PE=4 SV=1		0	FALSE	62.377	27	3	117	3	275	24.2	7.56	19.87	18.66	21.19	39.34	23.73	38.33	15.49	163.52	17	16.8	3.43	12.97	10.61	21.47	3.86	4.55	11.12	13.23	0	7.15	3	2	2	2	2	2	2	2	2	2	1	2	2	2
FALSE	High	Master Protein	B0LUE8	Apolipophorin-III-like protein OS=Apis mellifera OX=7460 GN=A4 PE=2 SV=1		0	FALSE	15.786	21	3	12	3	193	21.3	5.66				1.73		0			7.16					4.71		0	1.71		4.18					1		1			3					3
FALSE	High	Master Protein	B5APR7	Apyrase OS=Apis mellifera OX=7460 PE=2 SV=1		0	FALSE	18.644	6	2	23	2	567	63.4	6.43	3.08	2.86	2.46			2.39	8.49	2.02			11.44	15	2.98				8.09			2.98	1	1	1			2	2	1			2	2	1
FALSE	High	Master Protein	A0A1Q4P6B1	Arginine ABC transporter substrate-binding protein OS=Serratia marcescens OX=615 GN=BHU62_01140 PE=3 SV=1		0	FALSE	8.796	12	2	3	2	244	26.7	6.79																				8.65
FALSE	High	Master Protein	A0A088ARZ8	Arginine kinase OS=Apis mellifera OX=7460 PE=3 SV=1		0	FALSE	611.629	81	36	2117	36	383	43.4	6.55	554.56	208.15	193.48	85.05	80.81	326.78	113.66	122.73	84.77	143.81	532.34	461.29	281.8	173.56	30.9	595.24	850.8	240	748.84	28.14	30	23	23	18	17	28	22	21	18	20	30	30	26	22
FALSE	High	Master Protein	A0A221HAI2	Arginine N-succinyltransferase OS=Serratia marcescens OX=615 GN=astA PE=3 SV=1		0	FALSE	11.608	8	2	2	2	344	38.5	6.25																				4.36
FALSE	High	Master Protein	A0A1C3HKI8	Argininosuccinate lyase OS=Serratia marcescens OX=615 GN=argH PE=3 SV=1		0.009	FALSE	2.263	2	1	1	1	457	50	5.3																				2.24
FALSE	High	Master Protein	A0A093SN42	Argininosuccinate synthase OS=Pectobacterium carotovorum subsp. carotovorum OX=555 GN=argG PE=3 SV=1		0	FALSE	8.87	6	2	2	2	448	49.9	5.33														4.9																				2
FALSE	High	Master Protein	A0A0M5M048	Argininosuccinate synthase OS=Serratia marcescens OX=615 GN=argG PE=3 SV=1		0	FALSE	13.531	12	4	6	4	406	45	5.54																				11.02
FALSE	High	Master Protein	A0A088A113	ARID domain-containing protein OS=Apis mellifera OX=7460 GN=osa PE=4 SV=1		0	FALSE	6.024	1	1	1	1	2103	228.5	6.86		3.22																				1
FALSE	High	Master Protein	A0A088AM48	Arp2/3 complex 34 kDa subunit OS=Apis mellifera OX=7460 GN=Arc-p34 PE=3 SV=1		0	FALSE	13.189	13	4	17	4	306	35.8	7.68	4.45	5.63	2.66			2.41	1.77				2.26	5.01	4.31	0					2.52		2	2	1			2	2				1	2	2	1
FALSE	High	Master Protein	A0A087ZUT4	Arrestin_C domain-containing protein OS=Apis mellifera OX=7460 GN=409006 PE=4 SV=1		0	FALSE	5.056	3	1	3	1	492	54.2	5.62			2.69							2.81		2.71											1							1		1
FALSE	High	Master Protein	A0A088AH00	Arrestin_C domain-containing protein OS=Apis mellifera OX=7460 GN=ArrL2 PE=4 SV=1		0	FALSE	5.641	4	1	9	1	338	37.7	8.81			2.33		3.14		3.3		2.7	2.76		2.68	2.98	0	0								1		1		1		1	1		1	1	1
FALSE	High	Master Protein	A0A1B4XKK0	Asp23/Gls24 family envelope stress response protein OS=Enterococcus faecalis OX=1351 GN=CEQ17_02565 PE=4 SV=1		0.006	FALSE	2.628	10	1	1	1	186	20.5	4.83																				2.93
FALSE	High	Master Protein	A0A1C3HA90	Asparagine synthetase B [glutamine-hydrolyzing] OS=Serratia marcescens OX=615 GN=asnB PE=4 SV=1		0	FALSE	11.113	8	2	2	2	554	62.5	5.87									2.9											2.87									1
FALSE	High	Master Protein	A0A0A5LVI8	Asparagine--tRNA ligase OS=Serratia marcescens OX=615 GN=asnS PE=3 SV=1		0	FALSE	17.885	12	4	5	4	466	52.2	5.15									3.18						2.5					8.55									1
FALSE	High	Master Protein	A0A088A4B2	Aspartate aminotransferase OS=Apis mellifera OX=7460 GN=Got2 PE=4 SV=1		0	FALSE	302.627	66	27	534	27	429	48	9.22	165.38	147.6	90.32	5.98	22.22	95.67	118.96	123.12	9.46	31.34	124.21	152.15	84.96	18.54		71.52	121.91	109.17	105.05	2.07	20	20	15	3	6	17	16	18	4	8	21	23	17	9
FALSE	High	Master Protein	A0A088ASL4	Aspartate aminotransferase OS=Apis mellifera OX=7460 PE=4 SV=1		0	FALSE	176.653	70	18	288	17	365	41.5	7.24	53.54	90.95	52.68	9.4	26.46	40.69	40.13	27.55	14.04	47.41	65.73	155.53	66.65	19	0	4.28	60.21	2.21	96.39		10	14	11	6	6	9	8	6	5	11	14	18	13	8
FALSE	High	Master Protein	A0A093T8K9	Aspartate--tRNA ligase OS=Pectobacterium carotovorum subsp. carotovorum OX=555 GN=aspS PE=3 SV=1		0	FALSE	19.393	11	5	11	2	597	66.6	5.55					2.18					1.7				1.69	1.63					16.42					1					1				1
FALSE	High	Master Protein	A0A1Q5WAP0	Aspartate--tRNA ligase OS=Serratia marcescens OX=615 GN=aspS PE=3 SV=1		0	FALSE	15.319	8	4	10	1	594	66.4	5.27					2.18					1.7				1.69	1.63					13.99					1					1				1
FALSE	High	Master Protein	A0A1C3HES0	Aspartyl/Asparaginyl beta-hydroxylase OS=Serratia marcescens OX=615 GN=PWN146_02244 PE=4 SV=1		0.01	FALSE	2.146	4	1	1	1	253	29.3	9.28																				0
FALSE	High	Master Protein	A0A1L6QUP0	ATP phosphoribosyltransferase OS=Serratia marcescens OX=615 GN=hisG PE=3 SV=1		0	FALSE	5.075	5	1	2	1	299	33.3	5.63									2.81						1.8														1
FALSE	High	Master Protein	A0A080V1T5	ATP synthase epsilon chain OS=Serratia marcescens OX=615 GN=atpC PE=3 SV=1		0	FALSE	4.312	12	1	1	1	139	15.1	6.38														2.76																				1
FALSE	High	Master Protein	A0A093S5C6	ATP synthase gamma chain OS=Pectobacterium carotovorum subsp. carotovorum OX=555 GN=atpG PE=3 SV=1		0	FALSE	7.238	11	3	3	1	287	31.4	8.69									2.09						2.12					2.64									1
FALSE	High	Master Protein	A0A1Q4NYR4	ATP synthase gamma chain OS=Serratia marcescens OX=615 GN=atpG PE=3 SV=1		0	FALSE	14.63	16	4	5	2	287	31.5	8.68									2.09						2.12					8.95									1
FALSE	High	Master Protein	A0A343ITD7	ATP synthase subunit a OS=Apis mellifera syriaca OX=279977 PE=4 SV=1		0	FALSE	6.908	8	2	42	2	226	26.6	8.94	8.28	8.17	7.9	4.36	7.97	1.94	7.63		1.8	3.6	6.06	9.03	2.24	2.44	2.36						2	2	2	2	2	2	2		1	1	2	2	2	2
FALSE	High	Master Protein	A0A0G8B3R7	ATP synthase subunit a OS=Serratia marcescens OX=615 GN=atpB PE=3 SV=1		0	FALSE	5.918	7	1	1	1	259	28.7	6.89																				3.57
FALSE	High	Master Protein	A0A087ZQI5	ATP synthase subunit alpha OS=Apis mellifera OX=7460 GN=Atp5a1 PE=3 SV=1		0	FALSE	443.908	60	31	2423	30	547	59.5	8.9	424.7	358.6	274.14	257.91	277.17	333.6	381.9	330.79	242.57	256.06	258.75	284.35	264.04	152.55	112.07	342.49	1159.53	944.2	617.66	40.43	27	25	24	24	25	26	27	26	24	23	24	26	23	18
FALSE	High	Master Protein	C5CA76	ATP synthase subunit alpha OS=Micrococcus luteus (strain ATCC 4698 / DSM 20030 / JCM 1464 / NBRC 3333 / NCIMB 9278 / NCTC 2665 / VKM Ac-2230) OX=465515 GN=atpA PE=3 SV=1		0	FALSE	27.217	5	2	313	1	555	60.5	5.35	22.1	21.64	21.61	14.92	18.53	19.32	15.6	18.64	11.25	21.62	15.67	15.45	16	15.36	14.84	51.6	187.81	251.5	136.97	8.44	1	1	1	1	1	1	1	1	1	1	1	1	1	1
FALSE	High	Master Protein	A0A093SBP3	ATP synthase subunit alpha OS=Pectobacterium carotovorum subsp. carotovorum OX=555 GN=atpA PE=3 SV=1		0	FALSE	81.085	31	14	357	2	513	55.3	5.69	22.1	21.64	21.61	14.92	18.53	19.32	15.6	18.64	13.11	23.42	15.67	15.45	16	45.74	35.71	49.93	187.81	251.5	136.97	63.77	1	1	1	1	3	1	1	1	3	3	1	1	1	10
FALSE	High	Master Protein	A0A2G4QH48	ATP synthase subunit alpha OS=Serratia marcescens OX=615 GN=atpA PE=3 SV=1		0	FALSE	119.724	47	18	366	6	513	55.3	6.48	22.1	21.64	21.61	14.92	18.53	19.32	15.6	18.64	16.2	27.78	15.67	15.45	16	42.03	35.01	49.93	187.81	251.5	136.97	93.82	1	1	1	1	3	1	1	1	4	4	1	1	1	10
FALSE	High	Master Protein	A0A086FH14	ATP synthase subunit b OS=Serratia marcescens OX=615 GN=atpF PE=3 SV=1		0	FALSE	22.506	41	6	8	6	156	17.3	5.48														0	0					18.22														1
FALSE	High	Master Protein	A0A088AMB8	ATP synthase subunit beta OS=Apis mellifera OX=7460 GN=Atp5b PE=3 SV=1		0	FALSE	905.598	82	33	4632	33	516	55.1	5.41	863.15	653.28	520.44	526.6	515.41	728.23	767.51	656.81	486.19	558.54	522.57	570.81	591.24	331.22	151.01	853.82	2573.41	1823.06	1716.22	72.89	31	30	31	29	28	31	31	30	30	29	30	30	31	25
FALSE	High	Master Protein	A0A087ENJ2	ATP synthase subunit beta OS=Lactobacillus kunkeei OX=148814 GN=atpD PE=3 SV=1		0	FALSE	28.085	8	3	128	2	468	50.9	4.75	23.51	27.13	20.23	19.9	22.83	18.82	22.96	31.56	27.61	28.75	25.55	30.93	21.04	18.39	9.59						2	2	2	2	2	2	2	2	3	2	2	2	2	3
FALSE	High	Master Protein	A0A093SJJ8	ATP synthase subunit beta OS=Pectobacterium carotovorum subsp. carotovorum OX=555 GN=atpD PE=3 SV=1		0	FALSE	87.479	40	13	70	3	460	50.2	5				2.97	12.21				22.36	8.76				24.33	21.68					101.67				2	4				7	3				7
FALSE	High	Master Protein	A0A0M3UJK8	ATP synthase subunit beta OS=Serratia marcescens OX=615 GN=atpD PE=3 SV=1		0	FALSE	80.188	38	12	66	2	460	50.2	5.07				2.97	12.21				19.24	8.76				21.81	19.87					101.12				2	4				5	3				6
FALSE	High	Master Protein	A0A093TQ71	ATP synthase subunit c OS=Pectobacterium carotovorum subsp. carotovorum OX=555 GN=atpE PE=3 SV=1		0.002	FALSE	3.311	11	1	12	1	79	8.2	4.61					1.94				3.64					2.27	0					9.88					1				1					1
FALSE	High	Master Protein	A0A087ZS51	ATP synthase subunit d, mitochondrial OS=Apis mellifera OX=7460 GN=ATPsyn-d PE=3 SV=1		0	FALSE	226.007	79	18	836	18	174	20.3	5.12	159.48	157.85	134.95	108.18	112.54	137.21	140.36	91.21	97.41	83.12	122.2	124.9	114.58	55.69	16.17	102.08	225.15	150.82	129.73	17.1	14	14	14	13	14	15	16	14	13	11	14	14	12	11
FALSE	High	Master Protein	A0A0G8B4Q4	ATP synthase subunit delta OS=Serratia marcescens OX=615 GN=atpH PE=3 SV=1		0	FALSE	23.217	32	4	5	4	177	19.5	5.43																				15.03
FALSE	High	Master Protein	A0A088ACY7	ATP synthase subunit gamma OS=Apis mellifera OX=7460 GN=Atp5c1 PE=3 SV=1		0	FALSE	194.812	60	17	829	17	296	32.8	9.42	159.57	129.84	101.48	98.34	97.34	98.79	131.5	108.73	76.47	106.94	99.31	99.39	100.72	58.5	38.39	105.31	317.44	237.37	152.48	8.03	14	15	13	12	12	12	14	13	11	13	11	13	14	11
FALSE	High	Master Protein	A0A088A2G0	ATP synthase subunit OS=Apis mellifera OX=7460 PE=3 SV=1		0	FALSE	38.917	70	7	377	7	107	12.2	9.83	52.33	46.77	45.71	40.07	47.95	39.27	36.16	27.17	30.85	34.15	29.02	31.61	26.98	24.94	16.18	31.27	34.11	23.37	20.03		6	6	6	6	6	6	6	6	6	5	6	6	5	5
FALSE	High	Master Protein	A0A087ZY48	ATPase ASNA1 homolog OS=Apis mellifera OX=7460 GN=LOC409264 PE=3 SV=1		0	FALSE	23.047	22	6	14	6	339	38.3	5.29	5.88		1.97								0	5.27	2.74			1.75	1.69	1.69	1.79		2		2								1	2	1
FALSE	High	Master Protein	A0A088ARD2	ATP-citrate synthase OS=Apis mellifera OX=7460 GN=ATPCL PE=3 SV=1		0	FALSE	268.673	47	39	292	39	1086	120	7.74	87.93	26.15	18.92	1.95	8.25	47.29	57.34	26.66		37.16	102.88	86.12	62.56	52.09		37.08	46.34	14.53	37.71		26	10	8	1	4	15	17	10		12	27	26	18	18
FALSE	High	Master Protein	A0A087ZNI5	ATP-dependent (S)-NAD(P)H-hydrate dehydratase OS=Apis mellifera OX=7460 PE=3 SV=1		0	FALSE	50.494	28	7	21	7	350	38.4	9.28		16.8					3.16	2.53			6.07	19.2							4.09			3					1	1			1	5
FALSE	High	Master Protein	A0A093SM73	ATP-dependent 6-phosphofructokinase OS=Pectobacterium carotovorum subsp. carotovorum OX=555 GN=pfkA PE=3 SV=1		0	FALSE	7.547	8	2	5	1	320	34.9	5.6														2.89	3.76					4.7														1
FALSE	High	Master Protein	A0A084WZB2	ATP-dependent 6-phosphofructokinase OS=Serratia marcescens OX=615 GN=pfkA PE=3 SV=1		0	FALSE	4.482	6	2	4	1	320	35.1	5.6															2.13					7.02
FALSE	High	Master Protein	A0A0J5D3A5	ATP-dependent Clp protease ATP-binding subunit ClpA OS=Serratia marcescens OX=615 GN=clpA PE=3 SV=1		0.006	FALSE	2.605	1	1	2	1	759	84.2	6.25																				2.3
FALSE	High	Master Protein	A0A093SRU0	ATP-dependent Clp protease ATP-binding subunit ClpX OS=Pectobacterium carotovorum subsp. carotovorum OX=555 GN=clpX PE=3 SV=1		0	FALSE	7.382	8	3	3	3	424	46.4	5.6			2.07												0					1.67			1
FALSE	High	Master Protein	A0A087ZVI9	ATP-dependent Clp protease proteolytic subunit OS=Apis mellifera OX=7460 GN=LOC409011 PE=3 SV=1		0	FALSE	33.956	24	4	32	4	237	26.3	8.63	11.71	11.62	2.63			4.87	7.84	10.74			5.04	10.45	2.84			2.31	8.73	5.29	2.7		4	2	1			1	2	2			1	2	1
FALSE	High	Master Protein	A0A0G8B9R5	ATP-dependent Clp protease proteolytic subunit OS=Serratia marcescens OX=615 GN=clpP_1 PE=3 SV=1		0	FALSE	9.938	9	1	1	1	207	23.2	5.43																				4.69
FALSE	High	Master Protein	V5RI22	ATP-dependent Clp protease, ATPase subunit ClpB OS=Spiroplasma apis B31 OX=1276258 GN=clpB PE=3 SV=1		0	FALSE	10.515	4	2	3	1	715	80.5	5.96									2.28											6.03									1
FALSE	High	Master Protein	A0A093SEB8	ATP-dependent protease ATPase subunit HslU OS=Pectobacterium carotovorum subsp. carotovorum OX=555 GN=hslU PE=3 SV=1		0	FALSE	17.67	11	4	5	4	443	49.6	5.34														2.07						10.31														1
FALSE	High	Master Protein	A0A0M4S0A2	ATP-dependent protease subunit HslV OS=Serratia marcescens OX=615 GN=hslV PE=3 SV=1		0.002	FALSE	3.127	6	1	2	1	176	19.1	6.55																				5.26
FALSE	High	Master Protein	A0A093SEJ9	ATP-dependent RNA helicase RhlB OS=Pectobacterium carotovorum subsp. carotovorum OX=555 GN=rhlB PE=3 SV=1		0.002	FALSE	3.177	3	1	1	1	429	47.9	7.28																				1.99
FALSE	High	Master Protein	A0A093SFA0	ATP-dependent RNA helicase SrmB OS=Pectobacterium carotovorum subsp. carotovorum OX=555 GN=srmB PE=3 SV=1		0.002	FALSE	3.497	3	1	1	1	441	49.9	9.01																				3.27
FALSE	High	Master Protein	A0A0M4S196	ATP-dependent zinc metalloprotease FtsH OS=Serratia marcescens OX=615 GN=ftsH_1 PE=3 SV=1		0	FALSE	40.812	19	9	18	9	646	70.8	6.15														2.21						34.49														2
FALSE	High	Master Protein	A0A087ZZ68	ATP-grasp_2 domain-containing protein OS=Apis mellifera OX=7460 PE=4 SV=1		0	FALSE	27.243	22	5	19	5	322	36.1	5.66	2.43							1.66			7.05		1.67	1.9		5.25	2.62	4.65	10.96		2							1			3		1	1
FALSE	High	Master Protein	A0A088AHV3	ATP-synt_DE_N domain-containing protein OS=Apis mellifera OX=7460 GN=Atp5d PE=3 SV=1		0	FALSE	95.565	77	8	341	8	161	17.6	5.17	55.06	83.09	64.81	41.29	37.63	65.73	80.77	67.16	30.9	50.13	69.04	84.22	45.16	14.42		14.2	162.88	47.34	61.76		6	8	7	7	5	6	7	7	5	6	5	6	7	5
FALSE	High	Master Protein	A1YZD6	Autonomous glycyl radical cofactor OS=Serratia marcescens OX=615 GN=grcA PE=3 SV=1		0	FALSE	4.163	10	1	4	1	126	14.3	5.12					2.81				3.12						2.76					0					1				1
FALSE	High	Master Protein	A0A0N7JNS6	Autotransporter outer membrane beta-barrel domain-containing protein OS=Serratia marcescens OX=615 GN=AR325_01085 PE=4 SV=1		0	FALSE	44.892	11	6	8	1	1007	104.3	5.2																				29.51
FALSE	High	Master Protein	A0A221FWK4	Autotransporter outer membrane beta-barrel domain-containing protein OS=Serratia marcescens OX=615 GN=BVG93_22770 PE=4 SV=1		0	FALSE	41.933	11	6	8	0	1007	104.2	5.27																				28.76
FALSE	High	Master Protein	A0A221DWF1	Autotransporter outer membrane beta-barrel domain-containing protein OS=Serratia marcescens OX=615 GN=BVG97_21320 PE=4 SV=1		0	FALSE	58.057	16	8	15	2	1007	104.2	5.2																				62.78
FALSE	High	Master Protein	A0A2G5S2V4	Autotransporter outer membrane beta-barrel domain-containing protein OS=Serratia marcescens OX=615 GN=CS366_05475 PE=4 SV=1		0	FALSE	22.551	9	5	10	2	1030	107.1	5.26																				41.04
FALSE	High	Master Protein	A0A2G4NZ92	Autotransporter outer membrane beta-barrel domain-containing protein OS=Serratia marcescens OX=615 GN=CS368_12505 PE=4 SV=1		0	FALSE	21.603	9	5	10	1	1007	103.9	5.14																				35.98
FALSE	High	Master Protein	A0A087ZQ06	B3_4 domain-containing protein OS=Apis mellifera OX=7460 GN=LOC411407 PE=4 SV=1		0	FALSE	5.237	2	1	4	1	531	60.2	8.29	2.23		1.8								2.36			0							1		1								1			1
FALSE	High	Master Protein	A0A088AN03	B5 domain-containing protein OS=Apis mellifera OX=7460 GN=LOC551101 PE=4 SV=1		0.002	FALSE	3.368	2	1	2	1	590	67.5	6.29	2.2											2.3									1											1
FALSE	High	Master Protein	A0A088APR0	Bac_surface_Ag domain-containing protein OS=Apis mellifera OX=7460 GN=LOC413450 PE=4 SV=1		0	FALSE	97.495	39	15	172	15	483	54	9.09	34.56	34.94	33.27	32.01	45.27	21.61	47.69	22.31	17.39	20.5	24.22	17.35	22.27	12.13	9.71	7.6	2.7	11.72	7.74		8	8	9	9	10	7	9	7	6	4	5	6	8	4
FALSE	High	Master Protein	A0A084X6H7	Bacterial protein of uncharacterized function (DUF883) OS=Serratia marcescens OX=615 GN=AR325_15430 PE=4 SV=1		0	FALSE	12.833	51	2	2	2	82	8.4	7.25																				7.31
FALSE	High	Master Protein	A0A084X0H6	Bacterial protein of uncharacterized function (DUF883) OS=Serratia marcescens OX=615 GN=elaB_3 PE=4 SV=1		0	FALSE	27.758	52	3	6	3	102	11.3	7.42																				25.16
FALSE	High	Master Protein	A0A088AEB3	Battenin OS=Apis mellifera OX=7460 GN=cln3 PE=3 SV=1		0	FALSE	5.228	5	1	1	1	425	47.1	7.87													2.9																				1
FALSE	High	Master Protein	A0A088A3V9	Beta-galactosidase OS=Apis mellifera OX=7460 GN=LOC725756 PE=3 SV=1		0	FALSE	5.219	2	1	4	1	644	73	6.38						0					2.05	4.42														1					1	1
FALSE	High	Master Protein	A0A088AJN6	Beta-glucuronidase OS=Apis mellifera OX=7460 GN=LOC409814 PE=3 SV=1		0	FALSE	79.797	27	14	73	14	669	76.9	6.11	9.91	10.89	14.82	4.49	5.39	9.08	25.82	3.46	4.72	5.76	9.43	8.8	19.55		0	7.01	15.3	16.78	13.12		3	4	5	2	2	4	7	1	2	1	3	3	6
FALSE	High	Master Protein	A0A087ZUU5	Beta-hexosaminidase OS=Apis mellifera OX=7460 PE=3 SV=1		0	FALSE	63.219	26	10	41	10	541	61.3	6.99	8.53	10.1	7.31		2.85	7.53	3.4	3.3		3.29	14.91	15.19	4.06	8.6			2.48	2.23	7.72	2.31	4	4	2		1	3	1	1		1	4	5	1	5
FALSE	High	Master Protein	A0A221DLW7	Beta-N-acetylhexosaminidase OS=Serratia marcescens OX=615 GN=BVG97_03020 PE=4 SV=1		0	FALSE	5.661	1	1	2	1	885	98.6	6.71																				2.9
FALSE	High	Master Protein	A0A2G4QKV1	Bifunctional aspartokinase/homoserine dehydrogenase OS=Serratia marcescens OX=615 GN=CS370_22130 PE=3 SV=1		0.01	FALSE	2.207	2	1	1	1	819	88.5	5.77															0
FALSE	High	Master Protein	A0A1Q5WER8	Bifunctional polymyxin resistance protein ArnA OS=Serratia marcescens OX=615 GN=arnA PE=3 SV=1		0	FALSE	9.828	4	2	2	2	660	74.2	6.46										3.04				1.68																1				1
FALSE	High	Master Protein	A0A084WZQ1	Branched-chain-amino-acid aminotransferase OS=Serratia marcescens OX=615 GN=ilvE PE=3 SV=1		0.002	FALSE	2.979	4	1	1	1	308	33.8	6.38																				2.14
FALSE	High	Master Protein	A0A088A206	BRCT domain-containing protein OS=Apis mellifera OX=7460 GN=100576717 PE=4 SV=1		0	FALSE	9.823	2	2	4	2	1389	156.3	5.31		1.77															1.81	1.89	0			1
FALSE	High	Master Protein	A0A088ANI4	BRO1 domain-containing protein OS=Apis mellifera OX=7460 GN=ALiX PE=4 SV=1		0	FALSE	93.38	29	20	69	20	816	91.6	5.77	22.46	10.38	0		0	2.62	3.09	2.24	1.68	0	22.76	10.71	2.67	2.21		17.59	17.22	7.31	11		7	4	1		1	2	2	1	2	1	11	4	1	1
FALSE	High	Master Protein	A0A088ABD2	BTB domain-containing protein OS=Apis mellifera OX=7460 PE=4 SV=1		0	FALSE	7.029	6	2	11	2	429	48.7	9.17	2.58	5.89			2.66	2.46	2.62	2.59			3	2.64		3.07			1.97				1	1			1	1	1	1			1	1		1
FALSE	High	Master Protein	A0A088AWA1	C2 domain-containing protein OS=Apis mellifera OX=7460 GN=LOC724498 PE=4 SV=1		0	FALSE	17.486	13	5	8	5	409	46	9.61				4.88					3.45					2.11			0							3					2					1
FALSE	High	Master Protein	H9K909	C2 domain-containing protein OS=Apis mellifera OX=7460 GN=Syt20 PE=4 SV=1		0	FALSE	4.105	6	2	2	2	444	50.5	9.28		0					1.96															1					1
FALSE	High	Master Protein	A0A087ZTJ1	C2H2-type domain-containing protein OS=Apis mellifera OX=7460 GN=LOC408565 PE=4 SV=1		0	FALSE	21.413	6	4	10	4	761	85.7	6.71		6.42	1.86				2.08					2.07					3.68					2	1				1					3
FALSE	High	Master Protein	A0A088AAZ4	C2H2-type domain-containing protein OS=Apis mellifera OX=7460 GN=LOC412545 PE=4 SV=1		0.01	FALSE	2.181	4	1	1	1	420	50.3	6.58	0																				1
FALSE	High	Master Protein	A0A087ZQ49	CAAX prenyl protease OS=Apis mellifera OX=7460 GN=LOC551466 PE=3 SV=1		0	FALSE	24.808	21	8	21	8	442	52.1	7.77	2.22	8.89			2.13		9.32				2.16		6.31			0	4.92	4.27	2.18		2	3			1		3				1		2
FALSE	High	Master Protein	A0A088AAI1	Calcium load-activated calcium channel OS=Apis mellifera OX=7460 GN=LOC552501 PE=3 SV=1		0	FALSE	9.451	8	1	28	1	183	21.1	9.6	7.45	8.97	11.93	6.72	7.94	7.4	8.99	8.4	6.87	8.85	8.36	8.37	4.45	2.66	3.52						1	1	1	1	1	1	1	1	1	1	1	1	1	1
FALSE	High	Master Protein	A0A088ACZ9	Calcium-transporting ATPase OS=Apis mellifera OX=7460 GN=LOC410371 PE=3 SV=1		0	FALSE	545.919	50	51	1394	51	1002	110	5.64	225.58	219.61	167.51	202.43	222.42	200.63	227.81	220.11	142.24	488.28	140.1	181.15	228.17	85.11	89.15	139.87	189.71	129.71	93.55	30.85	36	34	33	34	35	34	37	36	31	47	28	32	35	25
FALSE	High	Master Protein	A0A087ZVD3	Calcium-transporting ATPase OS=Apis mellifera OX=7460 GN=LOC724440 PE=3 SV=1		0.002	FALSE	3.492	2	1	1	1	944	104.5	6.58											2.08																				1
FALSE	High	Master Protein	A0A087ZYD1	Calcium-transporting ATPase OS=Apis mellifera OX=7460 PE=3 SV=1		0	FALSE	271.345	37	34	364	34	1080	119.2	8.24	69.21	72.52	69.92	49.46	53.44	25.15	105.26	51.59	42.55	46.08	45.4	53.56	77.28	11.79	17.2	31.06	93.77	61.74	22.93	2.35	18	17	19	12	15	11	23	14	14	12	13	13	19	4
FALSE	High	Master Protein	A0A088ADK9	Calmodulin kinase II OS=Apis mellifera OX=7460 PE=4 SV=1		0	FALSE	6.664	4	1	1	1	576	64.3	7.68										5.05																				1
FALSE	High	Master Protein	A0A088AF78	Calponin OS=Apis mellifera OX=7460 GN=LOC408532 PE=3 SV=1		0	FALSE	60.078	66	9	88	9	169	19.1	8.4	26.46	21.2	6.01	11.49	5.35	29.33	3.47	3.39	8.16		21.78	21.95		6.7	4.97	5.69	17.71	13.96	21.47		5	5	2	4	2	6	1	1	3		5	6		3
FALSE	High	Master Protein	A0A087ZYU9	Calponin-homology (CH) domain-containing protein OS=Apis mellifera OX=7460 PE=4 SV=1		0	FALSE	14.326	18	2	7	2	184	21.6	8.92	7.04	4.2	2.02		2.07					2.41											2	1	1		1					1
FALSE	High	Master Protein	A0A087ZYV0	Calponin-homology (CH) domain-containing protein OS=Apis mellifera OX=7460 PE=4 SV=1		0	FALSE	103.138	19	20	88	20	1316	152.5	6.77	23.46	26.47	3.76	1.61	2.43	2.6	21.75	3.79	2.61	6.86	21.66	14.39	12.2		0	11.29	30.37	12.68	4.87		8	9	2	1	2	3	9	2	1	3	7	5	4
FALSE	High	Master Protein	A0A087ZZA9	Calponin-homology (CH) domain-containing protein OS=Apis mellifera OX=7460 PE=4 SV=1		0	FALSE	13.65	20	3	22	2	158	18.2	9.99	2.59	2.94	2.15	2.27	2.87		2.93		2.59	2.61	5.43	5.38	2.81	5.65		5.13	1.79	2.73	5.82	1.98	1	1	1	1	1		1		1	1	1	2	1	1
FALSE	High	Master Protein	A0A088AIY0	Calponin-homology (CH) domain-containing protein OS=Apis mellifera OX=7460 PE=4 SV=1		0	FALSE	18.442	2	4	18	4	1514	172.3	7.97	4.11	3.23	3.14	3.27	2.11	5.83	6.37	4.19			6.3	4.68	3.7	0				0			1	1	1	1	1	2	2	1			2	1	1	1
FALSE	High	Master Protein	A0A087ZP00	Calreticulin OS=Apis mellifera OX=7460 GN=Crc PE=3 SV=1		0	FALSE	164.617	62	19	194	19	403	47.1	4.6	60.18	10.47	27.05		0	48.12	3.51	17.6		18.32	98.66	71.39	11.44	2.91		31.68	51.98	38.35	30.63		9	4	7		1	9	1	3		5	15	11	2	2
FALSE	High	Master Protein	Q6ZXJ1	cAMP-dependent protein kinase type II regulatory chain OS=Apis mellifera carnica OX=88217 GN=pkar2 PE=2 SV=1		0	FALSE	106.281	49	14	93	14	383	43.8	5	33.84	2.45	7.02	4.16	4.92	33.83	13.21	9.48	2.01	13.8	39.95	31.91	10.27	1.94		6.47	25.8	4.63	10.95		8	1	3	2	2	9	4	4	2	4	10	5	3	1
FALSE	High	Master Protein	A0A088ACZ0	CAP-Gly domain-containing protein OS=Apis mellifera OX=7460 GN=LOC726065 PE=4 SV=1		0	FALSE	4.096	1	1	1	1	864	95.5	6.05							2.77																				1
FALSE	High	Master Protein	A0A088A001	CAP-Gly domain-containing protein OS=Apis mellifera OX=7460 GN=LOC726139 PE=4 SV=1		0	FALSE	4.431	9	2	3	2	244	28.2	5.52											0	1.8					0														1	1
FALSE	High	Master Protein	A0A088AEZ5	CAP-Gly domain-containing protein OS=Apis mellifera OX=7460 PE=4 SV=1		0	FALSE	5.244	1	1	3	1	1266	142.1	6.01	6.02	3.01																			1	1
FALSE	High	Master Protein	A0A088AUR2	Caprin-1_dimer domain-containing protein OS=Apis mellifera OX=7460 GN=LOC409086 PE=4 SV=1		0	FALSE	7.877	4	2	3	2	668	74.7	5.74		2.67									3.25					2.68						1									1
FALSE	High	Master Protein	Q76LA5	Carboxylic ester hydrolase OS=Apis mellifera OX=7460 GN=est PE=2 SV=1		0	FALSE	5.045	2	1	1	1	567	63.9	6.55														2.35																				1
FALSE	High	Master Protein	A0A087ZXF6	Carboxylic ester hydrolase OS=Apis mellifera OX=7460 GN=LOC406105 PE=3 SV=1		0	FALSE	10.948	6	3	3	3	527	59.6	5.81										9.03																				3
FALSE	High	Master Protein	A0A088AKG2	Carboxylic ester hydrolase OS=Apis mellifera OX=7460 GN=LOC408395 PE=3 SV=1		0	FALSE	8.771	6	3	5	3	582	65.6	8.16										4.04								3.38												2
FALSE	High	Master Protein	A0A088A7H8	Carboxylic ester hydrolase OS=Apis mellifera OX=7460 GN=LOC409171 PE=3 SV=1		0	FALSE	189.464	54	23	279	23	538	61.2	6.71	70.79	29.47	16.3	1.92	9.89	39.15	10.89	4.53	4.2	22.88	117.8	93.1	8.05	4.76		55.4	64.32	70.77	53.49		12	7	6	2	4	12	4	1	3	7	19	18	4	4
FALSE	High	Master Protein	A0A088A9C3	Carboxylic ester hydrolase OS=Apis mellifera OX=7460 GN=LOC726134 PE=3 SV=1		0	FALSE	16.155	10	4	8	4	527	58.7	7.46								2.95	7.29					8.36														1	3					4
FALSE	High	Master Protein	A0A087ZN44	Carboxypeptidase OS=Apis mellifera OX=7460 PE=3 SV=1		0	FALSE	63.655	28	9	111	1	409	46.8	8.85	23.7	24.36	8.36	14.16	9.96	14.31	19.68	7.21	6.12	21.76	16.93	12.63	23.97	11.98	4.57	8.57	2.3	6.25	10.02		7	6	3	6	5	5	7	2	2	6	4	4	8	6
FALSE	High	Master Protein	A0A088A7X0	Carn_acyltransf domain-containing protein OS=Apis mellifera OX=7460 PE=3 SV=1		0	FALSE	101.568	39	20	74	20	662	76.8	8.72	18.27	13.78	14.72	4.68	6.46		12.88	6.99		11.78	20.12	19.41	12.68	0	0	4.44	11.83	4.22	2.22		8	5	5	3	3		5	3		5	7	6	4	1
FALSE	High	Master Protein	A0A088AP68	Carrier domain-containing protein OS=Apis mellifera OX=7460 GN=LOC412815 PE=4 SV=1		0	FALSE	263.572	25	44	201	44	2388	264.3	6.52	39.57	33.15	9.71		6.1	24.04	8.07	1.76		33.97	113.37	50.96	30.4	14.78	0	12.47	42.23	2.37	28.11		14	11	3		4	10	4	3		10	31	15	8	7
FALSE	High	Master Protein	A0A088ACC2	Casein kinase II subunit beta OS=Apis mellifera OX=7460 GN=CkIIbeta PE=3 SV=1		0	FALSE	31.919	30	5	31	5	227	26.2	6.09	12.03	10.18	1.91	2.04	2.2		6.64	2.56	2.55	0	10.83	7.07	4.35	0	2.26			0			3	3	2	2	1		2	1	1	1	3	3	2	1
FALSE	High	Master Protein	A0A221FJW8	Catabolite repressor/activator OS=Serratia marcescens OX=615 GN=BVG93_00320 PE=4 SV=1		0	FALSE	6.513	4	1	1	1	334	37.9	7.59																				3.7
FALSE	High	Master Protein	A0A087ZRK9	Catalase OS=Apis mellifera OX=7460 PE=3 SV=1		0	FALSE	205.689	65	22	377	22	489	55.3	8.28	113.09	105.45	102.91	12.86	44.14	110.39	73.86	68.05	23.39	14.42	87.14	114.34	58.03	9.81	7.57	5.14	46.8	13.8	12.92	8.53	17	18	19	8	12	17	12	14	11	4	13	16	12	6
FALSE	High	Master Protein	D7RJ66	Catalase OS=Serratia marcescens OX=615 PE=3 SV=1		0	FALSE	8.114	3	1	1	1	478	54.8	6.54																				4.22
FALSE	High	Master Protein	A0A088ALT2	Cation-transporting ATPase OS=Apis mellifera OX=7460 GN=LOC412741 PE=3 SV=1		0.006	FALSE	2.571	2	1	1	1	1164	130.7	7.99											2.1																				1
FALSE	High	Master Protein	O83009	CBP21 OS=Serratia marcescens OX=615 GN=cbp PE=1 SV=1		0	FALSE	36.238	34	4	12	1	197	21.6	8.18																				38.34
FALSE	High	Master Protein	A0A0F9YN99	Cdc48-like aaa atpase OS=Nosema ceranae OX=40302 GN=AAJ76_1040006841 PE=3 SV=1		0	FALSE	20.103	4	2	9	1	708	78.6	5.72	3.28	2.17									6.87	5.49				0					1	1									1	2
FALSE	High	Master Protein	A0A087ZPQ1	CDP-diacylglycerol--inositol 3-phosphatidyltransferase OS=Apis mellifera OX=7460 GN=LOC411408 PE=3 SV=1		0	FALSE	4.271	5	1	1	1	217	24.9	8																			2.12
FALSE	High	Master Protein	A0A1Q4NWZ7	Cell division ATP-binding protein FtsE OS=Serratia marcescens OX=615 GN=BHU62_17270 PE=4 SV=1		0	FALSE	4.264	6	1	1	1	223	24.5	9.74																				3.07
FALSE	High	Master Protein	A0A221HG68	Cell division protein FtsX OS=Serratia marcescens OX=615 GN=BVG84_22655 PE=3 SV=1		0	FALSE	4.566	3	1	1	1	317	34.6	8.94																				2.77
FALSE	High	Master Protein	A0A080V639	Cell division protein FtsZ OS=Serratia marcescens OX=615 GN=ftsZ PE=3 SV=1		0	FALSE	27.202	19	5	10	5	384	40.4	4.82									2.93					2.41	6.44					17.01									1					1
FALSE	High	Master Protein	D3XL64	CG8192-PA-like protein (Fragment) OS=Apis mellifera OX=7460 PE=2 SV=1		0.001	FALSE	3.807	4	1	1	1	316	35.7	7.17								3.07																				1
FALSE	High	Master Protein	A0A088AVK1	cGMP-dependent protein kinase OS=Apis mellifera OX=7460 GN=100576901 PE=3 SV=1		0	FALSE	14.456	7	4	12	4	723	81.7	8.78			0			0		1.97	2.34		0		1.71	4.81									2			1		2	1		1		2	3
FALSE	High	Master Protein	A0A093S4S8	Chaperone protein ClpB OS=Pectobacterium carotovorum subsp. carotovorum OX=555 GN=clpB PE=3 SV=1		0	FALSE	56.622	19	10	23	2	858	95.5	5.64			2.44		5.07				5.08					31.13	2.94					9.04			1		1				1					8
FALSE	High	Master Protein	A0A1Q5W004	Chaperone protein ClpB OS=Serratia marcescens OX=615 GN=clpB PE=3 SV=1		0	FALSE	76.043	23	13	28	5	857	95.3	5.86			2.44		5.07				5.08					31.9	2.94					24.02			1		1				1					8
FALSE	High	Master Protein	V5T846	Chaperone protein DnaK OS=Bifidobacterium sp. Hma3N OX=1293831 GN=dnaK PE=2 SV=1		0	FALSE	5.887	4	2	11	1	632	67.4	4.88	2.12	2.51	2.13			2.22	2.25			2.57	5.01	5.05		2.28							1	1	1			1	1			1	2	2		1
FALSE	High	Master Protein	A0A2G9R3D5	Chaperone protein DnaK OS=Enterococcus faecalis OX=1351 GN=dnaK PE=2 SV=1		0	FALSE	17.005	8	4	4	4	609	65.6	4.73														4.97						5.72														2
FALSE	High	Master Protein	A0A093S5W9	Chaperone protein DnaK OS=Pectobacterium carotovorum subsp. carotovorum OX=555 GN=dnaK PE=2 SV=1		0	FALSE	105.878	27	10	42	3	635	68.9	5	2.35							3.61				3.86		14.09	0	8.56	11.95	4.19	28.14	57.03	1							1				1		4
FALSE	High	Master Protein	A0A1Q4P2Y3	Chaperone protein DnaK OS=Serratia marcescens OX=615 GN=dnaK PE=2 SV=1		0	FALSE	142.344	42	18	61	11	637	69	4.97					2.1			3.61				3.86		24.72	4.32	8.56	11.95	4.19	28.14	90.54					2			1				1		5
FALSE	High	Master Protein	A0A0P0QBK3	Chaperone protein HtpG OS=Serratia marcescens OX=615 GN=htpG PE=3 SV=1		0	FALSE	24.464	10	4	6	4	621	70.5	5.15														2.66	2.15					15.8														1
FALSE	High	Master Protein	A0A1Q4P335	Chaperone SurA OS=Serratia marcescens OX=615 GN=surA PE=3 SV=1		0	FALSE	9.991	6	2	2	1	433	47.5	7.61																				5.93
FALSE	High	Master Protein	A0A1Q5W0E4	Chaperone SurA OS=Serratia marcescens OX=615 GN=surA PE=3 SV=1		0	FALSE	8.176	5	2	2	1	433	47.6	7.61																				6.72
FALSE	High	Master Protein	A0A088A013	CHCH domain-containing protein OS=Apis mellifera OX=7460 GN=LOC726337 PE=4 SV=1		0.002	FALSE	2.962	10	1	2	1	156	17.2	4.96						2.16						2.68														1						1
FALSE	High	Master Protein	Q1HEB9	Chitinase A OS=Serratia marcescens OX=615 GN=chiA PE=3 SV=1		0	FALSE	11.26	7	3	3	3	563	61	7.08																				5.44
FALSE	High	Master Protein	Q0GFB9	Chitinase B OS=Serratia marcescens OX=615 GN=chiB PE=3 SV=1		0	FALSE	16.612	7	3	4	3	497	55.6	6.74																				12.83
FALSE	High	Master Protein	Q700B8	Chitinase C1 OS=Serratia marcescens OX=615 GN=chiC1 PE=1 SV=1		0	FALSE	10.224	7	2	3	2	480	51.7	5.77																				8.04
FALSE	High	Master Protein	R9WW03	Chitin-binding protein (Fragment) OS=Serratia marcescens OX=615 PE=4 SV=1		0	FALSE	37.624	49	4	10	1	170	18.7	7.42																				32.78
FALSE	High	Master Protein	A0A088AQQ4	Chitin-binding type-2 domain-containing protein OS=Apis mellifera OX=7460 GN=724199 PE=4 SV=1		0	FALSE	36.217	39	3	21	3	201	23	5.11			3.56		5.14	0							10.1		0		4.63			22.45			1		1	1							2
FALSE	High	Master Protein	A0A088APL1	Chitin-binding type-2 domain-containing protein OS=Apis mellifera OX=7460 GN=Cht5 PE=4 SV=1		0	FALSE	206	49	29	185	29	605	69	6.19			2.53		14.14	137.95							141.77		107.23		3.87			78.26			1		5	25							24
FALSE	High	Master Protein	A0A088A611	Chitin-binding type-2 domain-containing protein OS=Apis mellifera OX=7460 GN=LOC413705 PE=3 SV=1		0	FALSE	278.098	55	23	568	23	508	56.1	6.95	21.71		147.14		122.92	258.71			14.43	2.96	10		238.54	25.31	366.8	1.65	34.37	3.04	10.04	233.23	7		18		17	20			6	1	3		18	10
FALSE	High	Master Protein	A0A088AQI9	Chitin-binding type-2 domain-containing protein OS=Apis mellifera OX=7460 GN=LOC725725 PE=4 SV=1		0	FALSE	45.376	48	3	104	3	96	10.3	4.59	10.7		0	3.81	26.12	35.38			36.64		14.41		23.53	26.08	12.45		12.35			75.38	2		1	1	3	3			3		2		3	3
FALSE	High	Master Protein	A0A087ZS42	Chitin-binding type-2 domain-containing protein OS=Apis mellifera OX=7460 GN=LOC727129 PE=4 SV=1		0.004	FALSE	2.801	9	1	2	1	124	14.1	6								2.58							0													1
FALSE	High	Master Protein	A0A088A1P6	Chitin-binding type-2 domain-containing protein OS=Apis mellifera OX=7460 GN=serp PE=4 SV=1		0	FALSE	3.968	3	1	1	1	532	60.6	5.08								2.8																				1
FALSE	High	Master Protein	A0A088A1P7	Chitin-binding type-2 domain-containing protein OS=Apis mellifera OX=7460 GN=verm PE=4 SV=1		0.008	FALSE	2.381	2	1	1	1	549	62.2	5.14								2.24																				1
FALSE	High	Master Protein	A0A088ANX6	Chitin-binding type-2 domain-containing protein OS=Apis mellifera OX=7460 PE=4 SV=1		0	FALSE	13.649	5	5	6	5	958	105.9	5.05				3.6			1.71	3.04									0							3			1	1
FALSE	High	Master Protein	A0A087ZN59	CHK domain-containing protein OS=Apis mellifera OX=7460 GN=LOC408421 PE=4 SV=1		0	FALSE	120.944	55	22	256	22	401	46.5	7.75	19.01	18.08	54.02	0	7.59	21.07	14.18	53.73	50.21	27.14	44.57	25.56	19.53	68	14.81	20.18	21.76	31.97	12.46	2.65	7	5	14	1	5	6	6	14	15	9	10	10	10	17
FALSE	High	Master Protein	A0A087ZPX5	CHK domain-containing protein OS=Apis mellifera OX=7460 GN=LOC724536 PE=4 SV=1		0	FALSE	64.335	35	12	40	12	410	48	5.68			1.63			29.66					0		21.27		3.94		0			3.53			1			10					1		8
FALSE	High	Master Protein	A0A088AS57	CHK domain-containing protein OS=Apis mellifera OX=7460 GN=LOC725439 PE=4 SV=1		0	FALSE	20.889	16	5	6	5	417	48.3	6.29						2.3				2.08	3.11								0							1				1	1
FALSE	High	Master Protein	A0A088AES4	CHK domain-containing protein OS=Apis mellifera OX=7460 GN=LOC726965 PE=4 SV=1		0	FALSE	36.97	24	9	13	9	455	52	5.53								0						22.17														1						8
FALSE	High	Master Protein	A0A088ARW7	CHK domain-containing protein OS=Apis mellifera OX=7460 PE=4 SV=1		0	FALSE	19.558	25	6	8	6	263	30.6	5.15			6.93						0					9.4					0				2						1					4
FALSE	High	Master Protein	A0A088AM85	Chloride channel protein OS=Apis mellifera OX=7460 GN=LOC408467 PE=3 SV=1		0	FALSE	7.395	2	1	1	1	998	111.4	8.19											2.22																				1
FALSE	High	Master Protein	A0A088A776	Chloride channel protein OS=Apis mellifera OX=7460 PE=3 SV=1		0.009	FALSE	2.292	3	1	1	1	865	96.1	7.47							2.23																				1
FALSE	High	Master Protein	A0A088A5A4	Chromo domain-containing protein OS=Apis mellifera OX=7460 GN=Chro PE=4 SV=1		0	FALSE	13.066	3	2	4	2	1076	115.1	5.6											2.87						3.46	3.05													2
FALSE	High	Master Protein	A0A2G4PFT1	Chromosome partition protein MukB OS=Serratia marcescens OX=615 GN=mukB PE=3 SV=1		0.004	FALSE	2.829	1	1	1	1	1482	169.3	5.38																				0
FALSE	High	Master Protein	P56682	Chymotrypsin inhibitor OS=Apis mellifera OX=7460 PE=1 SV=1		0	FALSE	15.791	75	3	38	3	56	6	4.73	0	0	2.18	4.33	0	4.78	2.56	2.11	2.83	1.6	0	1.61	2.4	2.54		0	0	2.1		1.69	1	1	2	2	1	2	2	2	1	2	2	2	2	2
FALSE	High	Master Protein	A0A087ZTW4	CID domain-containing protein OS=Apis mellifera OX=7460 GN=LOC412928 PE=4 SV=1		0.01	FALSE	2.228	7	1	1	1	338	38.3	8.28													0																				1
FALSE	High	Master Protein	A0A088AKI2	Citrate synthase OS=Apis mellifera OX=7460 GN=LOC410059 PE=3 SV=1		0	FALSE	384.668	62	27	1601	27	462	51.9	9	327.63	205.01	188.41	24.11	75.84	155.28	176.73	189.85	53.91	70.28	270.12	200.84	145.04	102.37	2.74	284.32	1057.84	871.08	329.35	4.97	24	21	20	8	14	20	22	22	11	13	21	21	19	15
FALSE	High	Master Protein	A0A093SP22	Citrate synthase OS=Pectobacterium carotovorum subsp. carotovorum OX=555 GN=gltA PE=3 SV=1		0	FALSE	71.528	20	7	72	2	428	48.1	6.57					31.66				24.65		6.96			28.87	27.91			2.28		53.97					5				5		2			7
FALSE	High	Master Protein	A0A0P0QCH6	Citrate synthase OS=Serratia marcescens OX=615 GN=AR325_09565 PE=3 SV=1		0	FALSE	8.653	7	2	2	2	387	42.5	6.84																				6.28
FALSE	High	Master Protein	A0A084WVY8	Citrate synthase OS=Serratia marcescens OX=615 GN=gltA PE=3 SV=1		0	FALSE	109.492	49	15	70	10	430	48.4	6.77					23.26				27.66		0			32.92	29.42					91.27					4				4		1			6
FALSE	High	Master Protein	A0A1Q5VZC9	Class II fructose-bisphosphate aldolase OS=Serratia marcescens OX=615 GN=A8A12_20100 PE=3 SV=1		0	FALSE	42.884	20	5	38	2	359	39	5.88	4.42				3.98	3.44			10.3		3.41			12.86	6.89					70.06	1				1	1			2		1			3
FALSE	High	Master Protein	A0A088AFV6	Clathrin heavy chain OS=Apis mellifera OX=7460 GN=LOC550716 PE=3 SV=1		0	FALSE	347.578	40	52	387	52	1678	192	5.94	86.14	112.15	61.36	3.98	22.75	26.82	100.78	28.52	8.43	29.9	113.05	102.31	84.63	16.74	20.09	25.7	84.41	13.78	37.69		22	25	16	2	10	10	21	13	3	10	31	25	22	10
FALSE	High	Master Protein	A0A087ZRM7	Clathrin light chain OS=Apis mellifera OX=7460 GN=Clc PE=3 SV=1		0	FALSE	15.608	18	4	13	4	209	23.5	4.79	0	0									0	0				0	6.41	3.76	0		1	2									1	2
FALSE	High	Master Protein	A0A088A0J5	Cleavage and polyadenylation specificity factor subunit 5 OS=Apis mellifera OX=7460 GN=LOC552140 PE=3 SV=1		0	FALSE	35.257	39	6	14	6	228	26.1	8.85		8.89	0				2.2							0		1.83	2.97	0	3.56			4	1				1							1
FALSE	High	Master Protein	A0A221HAS5	ClpV1 family T6SS ATPase OS=Serratia marcescens OX=615 GN=BVG84_12490 PE=4 SV=1		0.01	FALSE	2.223	1	1	1	1	884	96.8	5.44																				2.79
FALSE	High	Master Protein	A0A087ZNX2	CN hydrolase domain-containing protein OS=Apis mellifera OX=7460 GN=LOC409250 PE=4 SV=1		0	FALSE	16.234	15	4	7	4	383	43.4	5.92			6.47					3.28	3.53					10.14									2					1	1					3
FALSE	High	Master Protein	A0A088AAA2	CN hydrolase domain-containing protein OS=Apis mellifera OX=7460 GN=LOC413631 PE=4 SV=1		0.01	FALSE	2.199	3	1	1	1	516	59.1	8.54														1.66																				1
FALSE	High	Master Protein	A0A088A886	CN hydrolase domain-containing protein OS=Apis mellifera OX=7460 GN=LOC413852 PE=4 SV=1		0	FALSE	6.731	7	2	7	2	304	34.6	8.02	4.94					1.98		1.83			5.01					0					1					1		1			1
FALSE	High	Master Protein	A0A088A404	CN hydrolase domain-containing protein OS=Apis mellifera OX=7460 PE=4 SV=1		0	FALSE	4.94	5	1	4	1	277	31.4	6.54											2.9	2.05							0												1	1
FALSE	High	Master Protein	A0A088ALI4	Coatomer subunit alpha OS=Apis mellifera OX=7460 GN=alphaCop PE=4 SV=1		0	FALSE	44.584	12	9	18	9	1214	137.9	7.36	7.13	2.48									15.03	5.72		0		0	5.96		6.17		3	1									5	2		1
FALSE	High	Master Protein	A0A088A977	Coatomer subunit beta OS=Apis mellifera OX=7460 GN=betaCop PE=4 SV=1		0	FALSE	45.817	14	9	22	9	949	104.7	6.07	4.31	3.95	3.09			3.01					10.02	2.71	5.27	5.19	2.11	0	7.34		5.34		1	2	1			1					3	1	2	3
FALSE	High	Master Protein	A0A087ZY82	Coatomer subunit beta' OS=Apis mellifera OX=7460 PE=3 SV=1		0	FALSE	19.384	6	4	13	4	899	101.3	5.96	0	4.39									0	4.55	2.47	0			5.88	2.02	3.69		1	1									1	2	1	1
FALSE	High	Master Protein	A0A088AGY8	Coatomer subunit delta OS=Apis mellifera OX=7460 GN=deltaCOP PE=3 SV=1		0	FALSE	27.562	17	6	17	6	515	57.8	5.62	5.36	2.72	1.92			1.84	2.48				11.52	5.7	2.73		1.75	0	1.87				2	1	1			1	1				4	2	1
FALSE	High	Master Protein	A0A088A207	Coatomer subunit epsilon OS=Apis mellifera OX=7460 PE=3 SV=1		0	FALSE	34.726	29	6	26	6	300	34.7	5.55	4.93	5.11	2.11			0					5.31	7.93	2.35	0		0	2.45	5.32	5.45		2	3	2			1					2	3	2	1
FALSE	High	Master Protein	A0A088AII7	Coatomer subunit gamma OS=Apis mellifera OX=7460 GN=gammaCop PE=3 SV=1		0	FALSE	74.556	20	12	50	12	876	96.4	5.58	15.84	14.69	5.24		0	3.2	4.03	7.05		2.42	22.43	4.35	10.45	4.08	5.67	3.99	2.19				5	5	3		1	1	2	3		1	7	2	3	2
FALSE	High	Master Protein	A0A0A5M259	Co-chaperone YbbN OS=Serratia marcescens OX=615 GN=ybbN PE=4 SV=1		0	FALSE	6.417	6	1	1	1	284	31.5	4.79																				3.85
FALSE	High	Master Protein	A0A088AQJ1	Coiled-coil_56 domain-containing protein OS=Apis mellifera OX=7460 PE=4 SV=1		0.004	FALSE	2.945	7	1	4	1	118	13.9	9.63								1.92	1.99						1.6				0									1	1
FALSE	High	Master Protein	A0A093SQ08	Cold-shock protein OS=Pectobacterium carotovorum subsp. carotovorum OX=555 GN=KP17_06375 PE=4 SV=1		0	FALSE	10.511	32	2	19	2	69	7.4	7.25			2.34	1.99	4.38	2.08			4.66					9.76	4.33					13.97			1	1	1	1			2					2
FALSE	High	Master Protein	A0A086FC80	Cold-shock protein OS=Serratia marcescens OX=615 GN=A8A12_02415 PE=4 SV=1		0	FALSE	21.149	42	2	28	2	69	7.4	7.24	2.35		2.59			4.33			5.65					5.09	7.51		6.19			49.75	1		1			1			2					1
FALSE	High	Master Protein	A0A088A3U7	Collagen IV NC1 domain-containing protein OS=Apis mellifera OX=7460 GN=LOC408551 PE=4 SV=1		0	FALSE	139.123	7	11	578	11	1833	183.2	6.98	67.01	78.91	98.8	90.4	97.27	35.24	79.34	86.12	64.28	82.49	53.1	58.78	70.14	84.69	53.24	16.98	76.5	90.47	18.46	35.07	8	9	9	9	8	5	9	9	8	9	6	9	8	10
FALSE	High	Master Protein	A0A088A3X0	Collagen IV NC1 domain-containing protein OS=Apis mellifera OX=7460 GN=LOC408552 PE=4 SV=1		0	FALSE	254.779	11	14	870	14	1929	190.9	7.09	173.57	193.67	166.37	210.56	194.84	66.28	200.18	162.84	105.94	155.8	107.16	126.18	129.92	139.46	99.5	65.2	245.08	203.75	64.94	32.53	14	13	9	10	8	8	12	11	12	8	10	11	12	9
FALSE	High	Master Protein	A0A088A6D6	Complex1_30kDa domain-containing protein OS=Apis mellifera OX=7460 GN=Ndufs3 PE=3 SV=1		0	FALSE	168.058	55	13	438	13	261	30.5	6.06	130.54	104.74	82.49	47.76	70.05	39.9	105.19	72.27	39.42	72.83	74.82	66.67	82.35	38.09	29.64	36.98	57.18	57.48	12.79	4.57	11	13	12	11	12	9	10	10	9	9	9	9	10	7
FALSE	High	Master Protein	A0A087ZNK1	Complex1_49kDa domain-containing protein OS=Apis mellifera OX=7460 GN=Ndufs2 PE=3 SV=1		0	FALSE	193.215	59	21	457	21	480	55.4	6.76	131.5	107.98	88.95	70.72	87.17	77.89	113.55	92.94	56.25	81.66	70.97	74.11	65.18	38.6	23.31	33.67	49.21	46.41	8.64	7.14	14	14	12	13	14	14	17	14	13	12	11	12	14	7
FALSE	High	Master Protein	A0A1Q5W4W3	Condensation protein OS=Serratia marcescens OX=615 GN=A8A12_15280 PE=4 SV=1		0.007	FALSE	2.427	1	1	1	1	969	105.8	4.98																				2.46
FALSE	High	Master Protein	A0A1Q5VYZ5	Copper homeostasis/adhesion lipoprotein NlpE OS=Serratia marcescens OX=615 GN=A8A12_19265 PE=4 SV=1		0	FALSE	7.065	14	2	3	2	227	24.8	6.07																				5.05
FALSE	High	Master Protein	A0A088ADK7	Coronin OS=Apis mellifera OX=7460 GN=LOC409316 PE=3 SV=1		0	FALSE	5.659	5	2	3	2	540	61.1	8.92		1.69					0										0					1					1
FALSE	High	Master Protein	A0A087ZSK9	Coronin OS=Apis mellifera OX=7460 GN=LOC412080 PE=3 SV=1		0	FALSE	19.889	14	6	9	6	494	54.8	6.54	3.03	2.8									2.16	9.34					4.7				1	1									1	3
FALSE	High	Master Protein	A0A088AJN1	Corrinoid adenosyltransferase OS=Apis mellifera OX=7460 GN=LOC552180 PE=3 SV=1		0	FALSE	31.696	36	5	24	5	226	25.5	7.87	15.89	3.54	5.47			3.8	0	4.2			6.09	11.45				2.46	2.48	4.75	2.47		3	2	2			1	1	2			2	2
FALSE	High	Master Protein	A0A088AD70	Costars domain-containing protein OS=Apis mellifera OX=7460 GN=LOC410370 PE=4 SV=1		0	FALSE	25.272	32	5	8	5	168	19.3	7.87			3.96					14.03									6.03						1					4
FALSE	High	Master Protein	A0A087ZR60	COX assembly mitochondrial protein OS=Apis mellifera OX=7460 GN=LOC552802 PE=3 SV=1		0	FALSE	6.847	22	2	6	2	123	14.3	9.06		0					0	2.35			0							0	0			1					1	1			1
FALSE	High	Master Protein	A0A088A2Z3	COX assembly mitochondrial protein OS=Apis mellifera OX=7460 GN=Ndufs5 PE=3 SV=1		0	FALSE	39.186	36	4	59	4	106	12.6	6.16	15.74	12.51	10.07	7.62	10.36	10.34	12.49	9.23	0	16.71	11.17	17.25	11.99	3.11	5.19	2.87	10.05	4.12	2.63	2.99	3	2	2	1	2	3	3	2	1	3	2	3	2	1
FALSE	High	Master Protein	A0A088AI62	COX6C domain-containing protein OS=Apis mellifera OX=7460 GN=Cox6c PE=4 SV=1		0	FALSE	31.551	80	6	159	6	75	8.8	9.16	32.62	23.47	18.94	17.95	11.34	14.37	16.34	12.97	13.23	11.89	11.8	8.71	5.81	6.51	0	3.74	14.52	7.5	10.33		6	5	4	4	3	4	4	4	4	4	4	3	4	3
FALSE	High	Master Protein	A0A087ZZR8	CPSF_A domain-containing protein OS=Apis mellifera OX=7460 PE=4 SV=1		0	FALSE	4.312	3	2	2	2	1138	126.1	5.39												0																				2
FALSE	High	Master Protein	A0A088A0Z8	CPSF_A domain-containing protein OS=Apis mellifera OX=7460 PE=4 SV=1		0	FALSE	5.667	1	1	1	1	1271	141.5	5.48												3.54																				1
FALSE	High	Master Protein	A0A088A1C5	CRAL-TRIO domain-containing protein OS=Apis mellifera OX=7460 GN=408361 PE=4 SV=1		0	FALSE	21.635	22	6	18	6	306	35.6	8.51			5.38	1.65		1.78			9.16	1.62	0		10.11				0		0				2	1		1			4	1	1		4
FALSE	High	Master Protein	A0A088A1P3	CRAL-TRIO domain-containing protein OS=Apis mellifera OX=7460 GN=727007 PE=4 SV=1		0	FALSE	10.961	8	2	2	2	317	37.1	7.93													2.51						2.32														1
FALSE	High	Master Protein	A0A088ADH8	CRAL-TRIO domain-containing protein OS=Apis mellifera OX=7460 GN=LOC409740 PE=4 SV=1		0	FALSE	41.637	32	8	24	8	310	36.2	8.59		12.61					7.59						2.35	2.87	1.95	1.82	7.85	9.13				5					4						1	1
FALSE	High	Master Protein	A0A088A1P2	CRAL-TRIO domain-containing protein OS=Apis mellifera OX=7460 GN=LOC552447 PE=4 SV=1		0	FALSE	10.431	11	3	3	3	288	34.1	8.62					2.72													3.13	0						1
FALSE	High	Master Protein	A0A087ZQ01	CRAL-TRIO domain-containing protein OS=Apis mellifera OX=7460 PE=4 SV=1		0	FALSE	8.756	11	2	3	2	313	36	7.87		3.45								2.37	2.22											1								1	1
FALSE	High	Master Protein	A0A088AC27	CRAL-TRIO domain-containing protein OS=Apis mellifera OX=7460 PE=4 SV=1		0	FALSE	31.477	32	7	30	7	279	32.4	6.9	12.15	4.88	2.01	7.99	2.03	4				3.18	11.12	10.74			2.27	1.74	7.7				3	2	1	3	1	2				1	3	4
FALSE	High	Master Protein	B2BZC0	Crp OS=Serratia marcescens OX=615 GN=crp PE=4 SV=1		0	FALSE	44.136	44	8	26	8	210	23.5	8.25					2.68				6.13					15.28	4.49					38.15					1				1					4
FALSE	High	Master Protein	A0A088ARS8	CS domain-containing protein OS=Apis mellifera OX=7460 PE=4 SV=1		0.004	FALSE	2.759	5	1	10	1	176	20.1	4.46	2.05		1.73			3.54			1.65	2.08	3.95	4.13									1		1			1			1	1	1	1
FALSE	High	Master Protein	A0A088AWB1	CS domain-containing protein OS=Apis mellifera OX=7460 PE=4 SV=1		0	FALSE	5.099	13	2	4	2	159	18.4	7.33	0										1.78	1.77				0					1										1	1
FALSE	High	Master Protein	A0A088ARR5	CSD_1 domain-containing protein OS=Apis mellifera OX=7460 GN=yps PE=4 SV=1		0	FALSE	28.479	14	4	20	4	279	30.2	9.95	6.5	7.7				8.76	3.06	5.74			6.16	7.28					5.76	1.62	4.01		2	2				2	1	2			2	3
FALSE	High	Master Protein	A0A093S8M2	CTP synthase OS=Pectobacterium carotovorum subsp. carotovorum OX=555 GN=pyrG PE=3 SV=1		0	FALSE	7.779	6	3	4	3	545	60.2	6.14									2.19						0					3									1
FALSE	High	Master Protein	A0A088AKE3	C-type lectin domain-containing protein OS=Apis mellifera OX=7460 GN=100578121 PE=4 SV=1		0	FALSE	12.189	11	3	15	3	315	37.2	9.91	0		4.31	7.44	5.81		2.13	0	6.87				0		2.7						1		1	3	2		1	1	2				1
FALSE	High	Master Protein	A0A087ZXS4	C-type lectin domain-containing protein OS=Apis mellifera OX=7460 GN=CTL11 PE=4 SV=1		0	FALSE	39.24	37	7	62	6	219	25.3	7.36	1.96	0	7.89	9.59	9.56		3.05	3.23	11.63	8.3	0	2.61	3.09	21.96	15.66	1.64	5.38	3.63			1	1	2	3	2		1	1	3	2	1	1	1	6
FALSE	High	Master Protein	A0A087ZNY6	C-type lectin domain-containing protein OS=Apis mellifera OX=7460 GN=CTL5 PE=4 SV=1		0	FALSE	151.964	71	11	471	10	217	25	8.32	56.27	72.62	103.73	115.48	93.49	11	82.85	69.68	86.85	83.12	26.09	43.18	48.98	99.66	80.41	17.73	46.18	48.84	10.02	29.67	8	9	9	10	9	4	10	9	10	9	7	7	10	10
FALSE	High	Master Protein	A0A088AM42	C-type lectin domain-containing protein OS=Apis mellifera OX=7460 PE=4 SV=1		0	FALSE	85.034	44	7	251	7	231	26.8	7.36	38.54	30.73	29.77	47.39	52.41	11.13	42.87	33.41	45.27	57.41	21.78	48.73	28.68	83.1	28.96	10.46	15.07	24.53	0	16.72	7	7	7	7	7	5	7	6	6	6	5	6	6	7
FALSE	High	Master Protein	A0A088AHY5	CUB domain-containing protein OS=Apis mellifera OX=7460 GN=LOC551372 PE=4 SV=1		0.002	FALSE	3.702	2	1	21	1	372	41.4	5.68	1.86	0		1.78	0	3.5	1.87	0	1.71		1.65	1.7	1.69	1.84	0						1	1		1	1	1	1	1	1		1	1	1	1
FALSE	High	Master Protein	A0A087ZSA2	CULLIN_2 domain-containing protein OS=Apis mellifera OX=7460 GN=LOC410565 PE=3 SV=1		0	FALSE	3.988	2	1	1	1	777	89.5	8.4																	0
FALSE	High	Master Protein	A0A088A6G8	CYCLIN domain-containing protein OS=Apis mellifera OX=7460 GN=LOC412342 PE=3 SV=1		0	FALSE	18.402	14	3	14	3	271	31.2	5.99	4.31	3.08				2.41	5.46				5.18		0			3.96	3	2.58	1.92		2	1				1	2				2		1
FALSE	High	Master Protein	A0A1L6QNN0	Cysteine desulfurase IscS OS=Serratia marcescens OX=615 GN=iscS PE=3 SV=1		0	FALSE	7.715	8	2	2	2	404	45	6.25															2.61					2.46
FALSE	High	Master Protein	A0A093SE41	Cysteine synthase OS=Pectobacterium carotovorum subsp. carotovorum OX=555 GN=KP17_11610 PE=3 SV=1		0	FALSE	22.753	19	4	14	2	322	34.6	6.4					5.93	3.19			11.84					3.33	10.29					6.14					2	1			3					1
FALSE	High	Master Protein	A0A2G4QW89	Cysteine synthase OS=Serratia marcescens OX=615 GN=cysK PE=3 SV=1		0	FALSE	27.438	23	6	13	4	322	34.2	5.45					3.28	3.19			5.71					3.33	6.46					18.58					1	1			1					1
FALSE	High	Master Protein	A0A1Q5W5Q0	Cysteine--tRNA ligase OS=Serratia marcescens OX=615 GN=cysS PE=3 SV=1		0.002	FALSE	3.647	2	1	1	1	461	52.2	5.36																				2.17
FALSE	High	Master Protein	A0A0P0QG09	Cystine ABC transporter substrate-binding protein OS=Serratia marcescens OX=615 GN=AR325_17445 PE=3 SV=1		0	FALSE	24.054	23	5	8	5	266	29.1	9.04																				22.43
FALSE	High	Master Protein	A0A347ZMU3	Cytochrome b OS=Apis mellifera OX=7460 GN=Cytb PE=3 SV=1		0	FALSE	21.373	18	5	92	1	383	45.2	9.29	18.98	14.53	13.14	11.76	18.72	7.31	8.67	4.84	7.82	7.92	6.37	6.21	8.35	8.02	8.8	7.39	4.27	0			4	5	4	5	4	3	4	1	2	3	3	2	3	3
FALSE	High	Master Protein	A0A0B5HAV3	Cytochrome b OS=Apis mellifera syriaca OX=279977 GN=CYTB PE=3 SV=1		0	FALSE	21.384	18	5	76	1	383	45.2	9.29	16.82	10.5	11.26	11.76	16.69	7.31	7	4.84	7.82	7.92	4.53	8.1	6.46	8.02	8.8	7.39	4.27	0			3	4	3	4	3	3	3	1	2	2	2	3	2	3
FALSE	High	Master Protein	A0A088AV27	Cytochrome b5 heme-binding domain-containing protein OS=Apis mellifera OX=7460 GN=LOC413164 PE=3 SV=1		0	FALSE	59.009	49	9	90	9	198	22.1	5.08	10.84	32.19	21.7	10.99	12.79	10.29	27.74	19.83	6.85	19.18	12.44	20.89	13.69	7.11	7.34	8.19	18.68	10.5	12.6		2	7	3	1	2	3	6	3	1	2	2	4	4	2
FALSE	High	Master Protein	A0A088A5G3	Cytochrome b5 heme-binding domain-containing protein OS=Apis mellifera OX=7460 GN=LOC413486 PE=3 SV=1		0	FALSE	11.114	55	3	26	3	138	15.8	4.7	3.25	9.45	6.17	6.26	6.42	5.73	10.41	6.25	5.99	7.45	3.23		3.34		6.86			0			1	2	1	1	1	1	2	1	1	1	1		1
FALSE	High	Master Protein	A0A087ZUT7	Cytochrome b5 heme-binding domain-containing protein OS=Apis mellifera OX=7460 GN=LOC726850 PE=3 SV=1		0	FALSE	7.999	13	1	2	1	135	15.3	4.7																	3.14		2.14
FALSE	High	Master Protein	A0A087ZUT8	Cytochrome b5 heme-binding domain-containing protein OS=Apis mellifera OX=7460 GN=LOC726860 PE=3 SV=1		0	FALSE	40.289	51	4	129	4	130	14.5	5.29	30.23	37.14	28.64	15.28	10.95	23.14	28.15	19.54	16.21	9.34	8.46	11.48	24.98	4.68	1.8	8.15	12.62	11.77	24.13	5.23	3	3	3	2	2	3	3	3	3	2	3	3	2	2
FALSE	High	Master Protein	A0A088AJP5	Cytochrome b5 heme-binding domain-containing protein OS=Apis mellifera OX=7460 PE=4 SV=1		0	FALSE	13.487	9	3	3	3	427	50.1	7.74										5.72									2.52											2
FALSE	High	Master Protein	A0A088AFT4	Cytochrome b-c1 complex subunit 6 OS=Apis mellifera OX=7460 GN=LOC726316 PE=3 SV=1		0	FALSE	41.808	44	2	168	2	87	10.2	6.99	28.07	28.35	28.4	5.38	23.49	17.98	40.19	27.35	23.64	31.3	15.38	19.36	24.81	0		0	18.52	6.38	0		2	2	2	2	2	2	2	2	2	2	2	2	2	1
FALSE	High	Master Protein	A0A088ASD9	Cytochrome b-c1 complex subunit 7 OS=Apis mellifera OX=7460 GN=LOC551757 PE=3 SV=1		0	FALSE	139.996	66	11	563	11	110	13.5	5.92	109.88	104.43	103.64	83.6	85.39	95.18	132.23	76.31	78.67	83.5	106.27	108.91	111.01	54.94	43.33	90.31	90.99	88.13	19.96	26.86	10	10	11	10	8	9	11	11	9	10	8	9	8	8
FALSE	High	Master Protein	A0A088AI48	Cytochrome b-c1 complex subunit Rieske, mitochondrial OS=Apis mellifera OX=7460 PE=4 SV=1		0	FALSE	105.18	59	14	423	14	246	26.7	9.13	102.02	89.4	67.61	75.13	66.5	62.57	82.09	49.32	42.84	56.61	65.14	72.4	68.73	39.07	20.9	20.39	33.78	21.8	17.89	2.22	12	11	10	9	10	9	11	11	9	9	9	9	9	8
FALSE	High	Master Protein	A0A0G8BBT5	Cytochrome bd-I ubiquinol oxidase subunit I OS=Serratia marcescens OX=615 GN=AR325_08470 PE=4 SV=1		0	FALSE	4.368	3	2	3	2	522	57.9	7.12																				6.84
FALSE	High	Master Protein	A0A087ZSK5	Cytochrome c heme lyase OS=Apis mellifera OX=7460 GN=LOC408968 PE=3 SV=1		0	FALSE	4.625	8	1	6	1	276	32.2	6.25	0	2.69	2.12		2.03		2.4			0											1	1	1		1		1			1
FALSE	High	Master Protein	P00038	Cytochrome c OS=Apis mellifera OX=7460 GN=cytC PE=1 SV=2		0	FALSE	68.349	53	7	217	7	108	11.9	9.47	44.99	32.13	22.54	1.96	4.36	42.45	29.55	47.09	4.92	8.68	43.68	69.49	16.88	4.47		6.82	65.1	28.21	13.54	5.24	7	7	7	1	2	7	7	7	2	3	7	7	5	3
FALSE	High	Master Protein	A0A0B5HAU2	Cytochrome c oxidase subunit 1 OS=Apis mellifera syriaca OX=279977 GN=COX1 PE=3 SV=1		0	FALSE	22.185	7	2	76	2	520	59.1	8.15	26.02	18.61	17.54	16.29	15.41	4.39	9.24	6.81	9	16.45		1.86				1.78	4.23	4.18	3.41	5.49	1	1	1	1	1	1	1	1	1	1		1
FALSE	High	Master Protein	P20375	Cytochrome c oxidase subunit 2 OS=Apis mellifera ligustica OX=7469 GN=COII PE=3 SV=1		0	FALSE	61.756	28	5	298	5	225	26.6	6.37	48.98	47.53	43.41	34.73	48.35	40.85	48.19	30.69	38.08	29.94	45.78	37.66	53.15	27.09	21.8	40.29	163.72	80.31	80.39	14.23	4	4	4	4	4	4	5	3	4	3	3	3	4	4
FALSE	High	Master Protein	A0A0S2LT44	Cytochrome c oxidase subunit 3 OS=Apis mellifera OX=7460 GN=COX3 PE=3 SV=1		0	FALSE	4.219	7	1	1	1	259	31	7.3												2.93																				1
FALSE	High	Master Protein	A0A087ZUZ0	Cytochrome c oxidase subunit OS=Apis mellifera OX=7460 GN=Cox6b1 PE=3 SV=1		0	FALSE	72.811	84	6	330	6	92	10.9	7.78	56.96	55.9	42.93	30.21	36.22	49.09	45.69	38.09	26.13	29.14	59.01	56.65	25.52	14.4		2.22	90.21	27.72	6.72	2.81	5	4	4	4	3	6	4	5	3	3	5	5	4	3
FALSE	High	Master Protein	A0A084WXS7	Cytochrome D ubiquinol oxidase subunit III OS=Serratia marcescens OX=615 GN=yhcB PE=4 SV=1		0	FALSE	8.676	29	3	3	3	133	15.3	5.59															0					6.01
FALSE	High	Master Protein	A0A093SIU6	Cytochrome o ubiquinol oxidase subunit I OS=Pectobacterium carotovorum subsp. carotovorum OX=555 GN=KP17_12765 PE=3 SV=1		0.009	FALSE	2.278	2	1	3	1	663	74	7.69														3.95	0																			1
FALSE	High	Master Protein	Q9NIM0	Cytochrome P450 (Fragment) OS=Trichogramma cacaeciae OX=1667566 GN=CYP4G12 PE=4 SV=1		0	FALSE	13.389	43	3	12	1	127	14.5	5.47						8.48				4.13									12.6							3				1
FALSE	High	Master Protein	Q309A5	Cytochrome P450 monooxygenase OS=Apis mellifera OX=7460 GN=CYP6AS5 PE=2 SV=1		0	FALSE	141.576	52	24	191	3	499	57.9	8.38	8.75	104.57	114.98	15.62	2.43	7.49	26.28	43.85	15.97	19.31	14.8	40.38	65.4	19.08	0	2.41	17.79	19.28	4.26		3	18	22	5	1	2	8	12	4	5	5	10	14	8
FALSE	High	Master Protein	A0A088AEK4	Cytochrome P450 monooxygenase OS=Apis mellifera OX=7460 PE=4 SV=1		0	FALSE	133.7	49	21	191	1	491	57.1	8.56	8.75	107.66	110.59	15.62	2.43	7.49	25.67	39.72	15.97	19.31	16.62	44.41	63.78	16.49	0	2.41	17.79	19.28	4.26		3	16	20	5	1	2	8	11	4	5	6	10	13	8
FALSE	High	Master Protein	F1DPP0	Cytochrome P450 OS=Apis mellifera OX=7460 PE=2 SV=1		0	FALSE	12.681	3	1	2	1	514	59.2	8.59																	7.36
FALSE	High	Master Protein	A0A221H5L4	Cytochrome ubiquinol oxidase subunit I OS=Serratia marcescens OX=615 GN=BVG84_01750 PE=3 SV=1		0.002	FALSE	3.177	2	1	1	1	663	74.4	7.93																				2.35
FALSE	High	Master Protein	A0A2G4QWM6	Cytoskeleton protein RodZ OS=Serratia marcescens OX=615 GN=rodZ PE=3 SV=1		0	FALSE	5.267	4	1	1	1	324	34.4	8.37																				2.53
FALSE	High	Master Protein	A0A088ADG9	CYTOSOL_AP domain-containing protein OS=Apis mellifera OX=7460 PE=4 SV=1		0	FALSE	173.797	58	17	186	17	457	49.3	6.98	74.15	16.44	17.62	5.17	3.12	36.17	32.67	15.76	6.79	27.78	75.97	54.08	27.13	53.49		48.1	55.92	46.79	39.09		12	4	4	2	1	8	7	3	2	5	13	10	6	11
FALSE	High	Master Protein	A0A088AR65	Cytosolic Fe-S cluster assembly factor NUBP2 homolog OS=Apis mellifera OX=7460 GN=LOC410516 PE=3 SV=1		0	FALSE	28.085	35	6	14	6	260	28	6.13	5.31	4.16					2.1				12.93	5.35	4.26	3.89					0		1	1					1				5	2	2	1
FALSE	High	Master Protein	A0A093SDA6	D-3-phosphoglycerate dehydrogenase OS=Pectobacterium carotovorum subsp. carotovorum OX=555 GN=KP17_17480 PE=3 SV=1		0	FALSE	6.046	6	2	3	1	410	44.2	6.42															2.25					5.15
FALSE	High	Master Protein	A0A221DUV0	D-3-phosphoglycerate dehydrogenase OS=Serratia marcescens OX=615 GN=BVG97_17880 PE=3 SV=1		0	FALSE	5.964	7	2	3	1	412	44.2	6.32															2.25					3
FALSE	High	Master Protein	A0A088ANE4	DAGKc domain-containing protein OS=Apis mellifera OX=7460 GN=727071 PE=4 SV=1		0	FALSE	8.681	5	2	3	2	432	49.3	8.29	2.22						2.25				0										1						1				1
FALSE	High	Master Protein	A0A088AGY9	DALR_1 domain-containing protein OS=Apis mellifera OX=7460 PE=3 SV=1		0.001	FALSE	3.903	2	1	1	1	508	59.2	8.65	1.73																				1
FALSE	High	Master Protein	A0A087ZYZ6	DAO domain-containing protein OS=Apis mellifera OX=7460 GN=LOC410999 PE=4 SV=1		0	FALSE	56.373	29	11	95	11	454	50.7	9.14	22.03	22.34	18.28	4.84	12.54	8.19	15.54	9.36	5.01	6.05	20.62	21.43	16.97		0	4.35	4.76	2.18	0		6	6	5	3	4	3	6	4	2	2	7	6	6
FALSE	High	Master Protein	A0A087ZUJ8	DAO domain-containing protein OS=Apis mellifera OX=7460 PE=4 SV=1		0	FALSE	8.186	7	2	4	2	420	46.9	6.14	0					0	2.64						0								1					1	1						1
FALSE	High	Master Protein	B9UKF1	Defensin OS=Apis cerana cerana OX=94128 GN=Def PE=2 SV=1		0	FALSE	4.344	27	2	3	2	95	10.7	7.24				0		0														1.94				1		1
FALSE	High	Master Protein	A0A088A822	Delta-1-pyrroline-5-carboxylate synthase OS=Apis mellifera OX=7460 GN=LOC412948 PE=3 SV=1		0	FALSE	307.097	48	31	247	31	784	85	7.81			179.39					271.91	89.44		0		0	104.5	2.58			10.34	33.89	0			27					31	21		2		1	23
FALSE	High	Master Protein	A0A088ACF3	Delta-aminolevulinic acid dehydratase OS=Apis mellifera OX=7460 GN=Pbgs PE=3 SV=1		0	FALSE	16.75	11	3	11	3	336	37	8.53			1.62			2.43		2.56		2.46	5.93	2.66					3.13	2.52	4.7				1			1		1		1	2	1
FALSE	High	Master Protein	A0A221HH78	Delta-aminolevulinic acid dehydratase OS=Serratia marcescens OX=615 GN=BVG84_22820 PE=3 SV=1		0.002	FALSE	3.229	4	1	1	1	340	37.7	5.59																				3.31
FALSE	High	Master Protein	A0A088AQM2	Deltameth_res domain-containing protein OS=Apis mellifera OX=7460 GN=LOC551381 PE=4 SV=1		0	FALSE	57.662	62	3	279	3	94	10.5	9.76	43.39	36.03	40.57	34.8	33.21	35.91	37.73	31.78	34.66	28.36	34.07	37.66	43.29	36.66	20.4	13.94	186.21	76.44	34.88		2	2	2	2	2	2	2	2	2	2	2	2	2	2
FALSE	High	Master Protein	A0A088A8J8	Deoxyhypusine hydroxylase OS=Apis mellifera OX=7460 GN=LOC410763 PE=3 SV=1		0	FALSE	4.435	3	1	7	1	303	34.2	5.11	1.72					0					0	2	0								1					1					1	1	1
FALSE	High	Master Protein	A0A0U8TLS0	Deoxyribose-phosphate aldolase OS=Serratia marcescens OX=615 GN=deoC PE=3 SV=1		0.006	FALSE	2.552	5	1	1	1	259	27.6	6.14																				0
FALSE	High	Master Protein	A0A087ZR38	DEP domain-containing protein OS=Apis mellifera OX=7460 GN=Trp1 PE=4 SV=1		0	FALSE	8.152	4	1	2	1	364	42.6	8.56													2.48						2.59														1
FALSE	High	Master Protein	A0A088A2G9	Dephospho-CoA kinase OS=Apis mellifera OX=7460 PE=3 SV=1		0	FALSE	10.711	13	2	7	2	236	27.2	9.26		2.07					4.91					0	3.14									1					1					1	2
FALSE	High	Master Protein	A0A088A6M4	Derlin OS=Apis mellifera OX=7460 GN=727262 PE=3 SV=1		0	FALSE	4.017	4	1	3	1	250	29.2	8.18							2.98				3.07		0														1				1		1
FALSE	High	Master Protein	A0A0G3SMT5	Di-/tripeptide transporter OS=Serratia marcescens OX=615 GN=dtpT PE=3 SV=1		0	FALSE	4.582	3	1	1	1	517	55.8	9.5																				2.94
FALSE	High	Master Protein	A0A088AI75	Diacylglycerol kinase OS=Apis mellifera OX=7460 GN=rdgA PE=3 SV=1		0	FALSE	23.725	5	4	6	4	1358	149.8	7.05		5.49					6.55										3.42	2.52				2					2
FALSE	High	Master Protein	A0A221DQ30	Diaminobutyrate--2-oxoglutarate transaminase OS=Serratia marcescens OX=615 GN=BVG97_09305 PE=3 SV=1		0.004	FALSE	2.758	3	1	1	1	460	49.5	6.89																				1.75
FALSE	High	Master Protein	A0A088APL2	Dihydrolipoamide acetyltransferase component of pyruvate dehydrogenase complex OS=Apis mellifera OX=7460 GN=LOC551631 PE=3 SV=1		0	FALSE	162.1	46	20	297	20	622	66.9	6.74	75.05	34.71	61.14	28.94	46.03	63	73.55	72.64	31.9	38.45	45.18	70.18	54.75	45.67	8.73	18.32	45.96	39.19	23.35		13	11	12	8	11	15	14	15	9	9	12	15	11	9
FALSE	High	Master Protein	A0A088AII9	Dihydrolipoyl dehydrogenase OS=Apis mellifera OX=7460 GN=LOC551039 PE=3 SV=1		0	FALSE	254.382	57	19	514	19	507	54.5	7.64	115.68	108.97	99.79	2.7	31.6	115.73	98.59	112.21	48.37	29	94.54	134.81	59.57	19.17	0	32.57	159.37	118.38	103.21		10	12	13	2	7	15	11	13	10	6	14	14	9	6
FALSE	High	Master Protein	A0A093SLA1	Dihydrolipoyl dehydrogenase OS=Pectobacterium carotovorum subsp. carotovorum OX=555 GN=KP17_07805 PE=3 SV=1		0	FALSE	53.662	25	9	41	1	474	50.5	6.23					2.51				13.96					18.29	7.76					41.14					3				4					6
FALSE	High	Master Protein	A0A2G4PMH8	Dihydrolipoyl dehydrogenase OS=Serratia marcescens OX=615 GN=lpdA PE=3 SV=1		0	FALSE	85.996	35	12	62	4	475	50.7	5.94				3.08	14.26				26.84					31.34	26.63					60.16				1	5				5					8
FALSE	High	Master Protein	A0A221FL88	Dihydrolipoyllysine-residue succinyltransferase component of 2-oxoglutarate dehydrogenase complex OS=Serratia marcescens OX=615 GN=BVG93_02960 PE=3 SV=1		0	FALSE	35.814	26	8	23	8	404	43.7	5.57			0		4.15				3.79					5.35	4.18					30.4			1		1				1					2
FALSE	High	Master Protein	A0A088AF14	Dihydroorotate dehydrogenase (quinone), mitochondrial OS=Apis mellifera OX=7460 GN=100577081 PE=3 SV=1		0	FALSE	11.166	8	3	9	3	392	43.4	9.22	0	0	0			0	1.67					1.95					2.44	2.11	1.79		1	1	1			1	1					1
FALSE	High	Master Protein	A0A2H4MD19	Dihydropteridine reductase (Fragment) OS=Apis mellifera OX=7460 GN=DHPR PE=2 SV=1		0	FALSE	45.344	50	8	42	1	230	24.9	8.76	7.1	6.07		2.09		11.55	2.43	2.56	1.64	6.37	11.31	25.84	2.46	2.08		3.76	2.06		2.21		3	1		1		3	1	1	1	2	3	7	1	1
FALSE	High	Master Protein	A0A0P0QHL2	Dihydroxyacetone kinase OS=Serratia marcescens OX=615 GN=AR325_20990 PE=4 SV=1		0	FALSE	11.903	10	2	2	2	333	35.1	5.67																				7.3
FALSE	High	Master Protein	A0A1Q4NU97	Dihydroxy-acid dehydratase OS=Serratia marcescens OX=615 GN=ilvD PE=3 SV=1		0	FALSE	12.799	7	3	5	3	616	65.7	5.96																				13.01
FALSE	High	Master Protein	A0A087ZQA2	Dipeptidase OS=Apis mellifera OX=7460 PE=3 SV=1		0	FALSE	30.119	12	4	13	4	418	47	7.24			5.44					21.56	0					7.97									1					4	1					3
FALSE	High	Master Protein	A0A1Q4NX88	Dipeptide ABC transporter ATP-binding protein OS=Serratia marcescens OX=615 GN=BHU62_17650 PE=3 SV=1		0.01	FALSE	2.169	4	1	1	1	326	35.8	7.47																				2.11
FALSE	High	Master Protein	A0A088ARC7	DJ-1_PfpI domain-containing protein OS=Apis mellifera OX=7460 PE=4 SV=1		0	FALSE	59.618	61	9	35	9	186	20.2	6.57	3.17	3.3				5.62		1.62		7.85	17.87	40.35	3.82				2.68		7.33		1	2				2		1		3	5	7	1
FALSE	High	Master Protein	Q936C3	DNA gyrase B subunit (Fragment) OS=Serratia entomophila OX=42906 GN=gyrB PE=4 SV=1		0	FALSE	7.401	8	2	2	1	323	36.1	7.24																				5.83
FALSE	High	Master Protein	O54355	DNA gyrase subunit A OS=Serratia marcescens OX=615 GN=gyrA PE=3 SV=1		0	FALSE	14.819	5	3	4	3	880	97.4	5.12																				11.12
FALSE	High	Master Protein	A0A221DX14	DNA gyrase subunit B OS=Serratia marcescens OX=615 GN=gyrB PE=3 SV=1		0	FALSE	12.813	7	4	4	3	804	89.9	6.16									0											8.6									1
FALSE	High	Master Protein	A0A0U8MXS2	DNA polymerase I OS=Serratia marcescens OX=615 GN=polA PE=3 SV=1		0	FALSE	6.549	2	1	1	1	933	102.3	5.26																				3.05
FALSE	High	Master Protein	A0A0G8BDP4	DNA protection during starvation protein OS=Serratia marcescens OX=615 GN=dps PE=3 SV=1		0	FALSE	51.005	57	7	24	7	167	18.8	6.04									3.68					7.49	5.67					62.53									1					1
FALSE	High	Master Protein	A0A0P0QFC4	DNA starvation/stationary phase protection protein OS=Serratia marcescens OX=615 GN=AR325_16360 PE=3 SV=1		0	FALSE	55.961	72	8	22	8	163	18.3	6.1					3.04										14.87					41.69					1
FALSE	High	Master Protein	A0A0P0QFE8	DNA topoisomerase 1 OS=Serratia marcescens OX=615 GN=topA PE=3 SV=1		0	FALSE	4.571	2	1	1	1	865	97.3	8.15																				2.37
FALSE	High	Master Protein	A0A088AGM4	DNA topoisomerase 2 OS=Apis mellifera OX=7460 PE=3 SV=1		0	FALSE	5.399	1	1	4	1	1440	164.3	8.78							2.15				2.17	2.61		0													1				1	1		1
FALSE	High	Master Protein	A0A088AAI8	DNA-(apurinic or apyrimidinic site) lyase OS=Apis mellifera OX=7460 GN=Rrp1 PE=3 SV=1		0.001	FALSE	3.832	5	1	1	1	336	38.7	9.09												0																				1
FALSE	High	Master Protein	P52681	DNA-binding protein HU-beta OS=Serratia marcescens OX=615 GN=hupB PE=3 SV=1		0	FALSE	6.57	16	1	22	1	90	9.3	10.27				2.82	3.63				6.48					2.11	2.23					55.27				1	1				1					1
FALSE	High	Master Protein	A0A1B4XNU0	DNA-binding protein OS=Enterococcus faecalis OX=1351 GN=A6B47_06885 PE=3 SV=1		0	FALSE	39.345	68	5	17	5	91	9.7	9.76								5.44					2.39	8.42	8.3					28.1								1					1	3
FALSE	High	Master Protein	A0A093TNL4	DNA-binding protein OS=Pectobacterium carotovorum subsp. carotovorum OX=555 GN=KP17_19060 PE=3 SV=1		0	FALSE	41.003	63	6	34	2	90	9.5	9.58	14.6			2.03		2.35			11.58		0			28.45	12.16					22.68	3			1		1			4		1			4
FALSE	High	Master Protein	A0A080UVZ0	DNA-binding protein OS=Serratia marcescens OX=615 GN=hns PE=3 SV=1		0	FALSE	56.216	34	5	24	5	135	15.4	5.47					2.05				4.99					8.17	4.41					49.02					1				2					2
FALSE	High	Master Protein	A0A086FC00	DNA-binding protein OS=Serratia marcescens OX=615 GN=hupA PE=3 SV=1		0	FALSE	30.034	63	5	22	1	90	9.5	9.58	2.79			2.03					10.92					16.01	9.05					25.89	1			1					3					3
FALSE	High	Master Protein	A0A221HGA1	DNA-binding response regulator OS=Serratia marcescens OX=615 GN=BVG84_21095 PE=4 SV=1		0.002	FALSE	3.413	6	1	1	1	232	26.3	5.67					0																				1
FALSE	High	Master Protein	A0A221HH74	DNA-binding response regulator OS=Serratia marcescens OX=615 GN=BVG84_24795 PE=4 SV=1		0	FALSE	13.335	17	3	4	3	238	27.2	5.68														4.12						7.48														1
FALSE	High	Master Protein	A0A080UX61	DNA-binding response regulator OS=Serratia marcescens OX=615 GN=ompR_2 PE=4 SV=1		0	FALSE	15.278	27	4	5	4	239	27.3	6.58														2.71	0					7.34														1
FALSE	High	Master Protein	A0A084WZE4	DNA-binding transcriptional regulator OxyR OS=Serratia marcescens OX=615 GN=oxyR_1 PE=4 SV=1		0	FALSE	8.48	6	1	1	1	305	34.3	6.38																				4.23
FALSE	High	Master Protein	A0A084WVH6	DNA-directed RNA polymerase subunit alpha OS=Serratia marcescens OX=615 GN=rpoA PE=3 SV=1		0	FALSE	77.854	51	13	74	13	329	36.4	5.06	0		0		2.92				14.94					26.65	24.69					86.74	1		1		3				7					10
FALSE	High	Master Protein	A0A093SJQ8	DNA-directed RNA polymerase subunit beta OS=Pectobacterium carotovorum subsp. carotovorum OX=555 GN=rpoB PE=3 SV=1		0	FALSE	72.086	17	16	39	1	1342	150.5	5.33									11.34					10.41	7.35					63.92									5					5
FALSE	High	Master Protein	A0A221HGE2	DNA-directed RNA polymerase subunit beta OS=Serratia marcescens OX=615 GN=rpoB PE=3 SV=1		0	FALSE	104.936	24	22	47	7	1342	150.5	5.22									11.34					7.64	4.65					94.14									5					4
FALSE	High	Master Protein	A0A1Q4NUD5	DNA-directed RNA polymerase subunit beta' OS=Serratia marcescens OX=615 GN=rpoC PE=3 SV=1		0	FALSE	101.77	18	21	53	21	1407	154.8	6.52					5.71				4.93	7.12				22.08	31.6					72.55					2				4	1				8
FALSE	High	Master Protein	A0A080V3I7	DNA-directed RNA polymerase subunit omega OS=Serratia marcescens OX=615 GN=rpoZ PE=3 SV=1		0.002	FALSE	3.181	10	1	2	1	91	10.2	4.92																				4.57
FALSE	High	Master Protein	A7VK89	DnaJ (Fragment) OS=Serratia marcescens OX=615 GN=dnaJ PE=4 SV=1		0.002	FALSE	2.976	5	1	1	1	239	25.6	8.19																				2.26
FALSE	High	Master Protein	A0A087ZYS0	Dolichol-phosphate mannosyltransferase subunit 1 OS=Apis mellifera OX=7460 GN=LOC409115 PE=3 SV=1		0	FALSE	17.566	18	3	13	3	253	29	8.4	6.74	6.9	6.58		3.29	4.45	4.37						7.44						2.6		2	2	2		1	2	1						2
FALSE	High	Master Protein	A0A087ZSQ6	Dolichyl-diphosphooligosaccharide--protein glycosyltransferase 48 kDa subunit OS=Apis mellifera OX=7460 GN=LOC552051 PE=3 SV=1		0	FALSE	76.791	32	9	78	9	434	48.4	5.55	24.04	17.8	21.64	7.66	12.56	21.93	21	6.27	10.82	3.27	18.79	13.04	24.12	2.67	10.07	3.84	7.09		9.09		6	4	4	3	4	5	3	2	3	1	4	2	4	1
FALSE	High	Master Protein	A0A087ZUX6	Dolichyl-diphosphooligosaccharide--protein glycosyltransferase subunit 1 OS=Apis mellifera OX=7460 PE=3 SV=1		0	FALSE	104.748	36	16	177	16	566	65.5	7.34	31.43	25.66	29.36	13.45	17.04	27.31	29.71	21.24	12.07	18.39	27.15	36.65	46.06	2.21	23.26	7.08	24.94	20.11	30.77		7	8	9	5	7	9	8	7	4	3	9	11	11	2
FALSE	High	Master Protein	A0A088A702	Dolichyl-diphosphooligosaccharide--protein glycosyltransferase subunit 2 OS=Apis mellifera OX=7460 PE=3 SV=1		0	FALSE	40.367	11	6	51	6	651	73.3	8.92	9.43	17.74	9.48	5.42	5.83	5.26	10.52	1.98	5.18	6.76	11.32	9.09	9.36		3.18	0	2.19	2.77	8.9		3	3	5	2	2	2	3	2	2	2	2	4	2
FALSE	High	Master Protein	A0A088AW39	Dolichyl-diphosphooligosaccharide--protein glycosyltransferase subunit DAD1 OS=Apis mellifera OX=7460 GN=LOC727568 PE=3 SV=1		0	FALSE	11.561	15	2	9	2	111	12.6	8.62																0	2.19	0	4.61
FALSE	High	Master Protein	A0A087ZUP5	DPPIV_N domain-containing protein OS=Apis mellifera OX=7460 PE=4 SV=1		0.002	FALSE	3.215	9	1	3	1	231	25.8	6.18									0				2.82	0															1				1	1
FALSE	High	Master Protein	A0A088A9P7	DRIM domain-containing protein OS=Apis mellifera OX=7460 PE=4 SV=1		0	FALSE	47.438	5	9	20	9	3057	355.9	8.48										45.59																				9
FALSE	High	Master Protein	A0A221DNP8	D-serine/D-alanine/glycine transporter OS=Serratia marcescens OX=615 GN=BVG97_06040 PE=4 SV=1		0	FALSE	11.255	3	1	3	1	466	51.1	8.91																				7.87
FALSE	High	Master Protein	A0A0G8B5M4	DUF1161 domain-containing protein OS=Serratia marcescens OX=615 GN=BVG93_08720 PE=4 SV=1		0	FALSE	4.275	26	1	1	1	99	10.3	4.88																				0
FALSE	High	Master Protein	A0A088A6Q4	DUF1279 domain-containing protein OS=Apis mellifera OX=7460 GN=LOC725167 PE=4 SV=1		0	FALSE	11.275	7	2	34	2	353	39.7	9.58	8.35	8.62	5.42	3.96	7.52	2.69	5.11	5.14	4.76	5.32	2.66	5.09	5.67	4.45	2.19	0					2	2	1	1	2	1	1	1	1	1	1	2	2	2
FALSE	High	Master Protein	A0A1L6QU74	DUF1338 domain-containing protein OS=Serratia marcescens OX=615 GN=BVG97_05685 PE=4 SV=1		0	FALSE	8.253	3	1	2	1	468	52.8	6.14																				5.26
FALSE	High	Master Protein	A0A0G3SHD9	DUF1480 domain-containing protein OS=Serratia marcescens OX=615 GN=AR325_13480 PE=4 SV=1		0	FALSE	8.336	22	1	1	1	79	8.8	5.71																				4.47
FALSE	High	Master Protein	A0A088A7I9	DUF1681 domain-containing protein OS=Apis mellifera OX=7460 GN=LOC409531 PE=4 SV=1		0	FALSE	8.859	12	2	3	2	243	27.3	8.51											3.37					0	3.82														1
FALSE	High	Master Protein	A0A088AMG1	DUF1713 domain-containing protein OS=Apis mellifera OX=7460 GN=107965473 PE=4 SV=1		0	FALSE	5.75	9	2	5	2	233	27.6	10.13					2.3	0											2.06	2.23	2.03						1	1
FALSE	High	Master Protein	A0A088A078	DUF1794 domain-containing protein OS=Apis mellifera OX=7460 GN=107964437 PE=4 SV=1		0	FALSE	10.813	14	2	7	2	169	19.7	8.73								0			3.05	3.8					1.72	0										1			2	1
FALSE	High	Master Protein	A0A088A055	DUF1907 domain-containing protein OS=Apis mellifera OX=7460 GN=LOC411385 PE=4 SV=1		0	FALSE	12.997	15	3	7	3	319	35.4	6.57			2.61								6.63	5.62		2.61					2.54				1								2	2		1
FALSE	High	Master Protein	A0A088ATH0	DUF2236 domain-containing protein OS=Apis mellifera OX=7460 GN=LOC408641 PE=4 SV=1		0	FALSE	12.88	7	2	5	2	339	40.1	9.2		2.45															6.12		1.88			1
FALSE	High	Master Protein	A0A0P0Q8D5	DUF3313 domain-containing protein OS=Serratia marcescens OX=615 GN=AR325_01480 PE=4 SV=1		0	FALSE	6.482	7	1	2	1	223	24.3	9.01																				4.5
FALSE	High	Master Protein	A0A088AA70	DUF3421 domain-containing protein OS=Apis mellifera OX=7460 PE=4 SV=1		0	FALSE	9.237	21	2	3	2	125	13.9	8.18						3.27									2.33											1
FALSE	High	Master Protein	A0A088ANF4	DUF3421 domain-containing protein OS=Apis mellifera OX=7460 PE=4 SV=1		0	FALSE	5.164	17	2	5	2	132	14.4	5.81			3.19					2.75	2.1				0		2.9								1					1	1				1
FALSE	High	Master Protein	A0A088AH64	DUF3456 domain-containing protein OS=Apis mellifera OX=7460 PE=4 SV=1		0.002	FALSE	3.623	10	1	1	1	200	23	4.82												2.33																				1
FALSE	High	Master Protein	A0A088AIL3	DUF3677 domain-containing protein OS=Apis mellifera OX=7460 PE=4 SV=1		0.008	FALSE	2.413	0	1	2	1	2049	231.5	6.55																				2.06
FALSE	High	Master Protein	A0A221H6V3	DUF4214 domain-containing protein OS=Serratia marcescens OX=615 GN=BVG84_04510 PE=4 SV=1		0	FALSE	25.039	7	5	10	3	882	89.5	4.75																				31.31
FALSE	High	Master Protein	A0A088AFW1	DUF4794 domain-containing protein OS=Apis mellifera OX=7460 GN=100576540 PE=4 SV=1		0	FALSE	5.171	6	2	3	2	296	32.4	4.78			0														2.78						1
FALSE	High	Master Protein	A0A088ABN7	DUF862 domain-containing protein OS=Apis mellifera OX=7460 GN=LOC409784 PE=4 SV=1		0	FALSE	12.045	4	2	2	2	558	63.5	5.29																	6.26
FALSE	High	Master Protein	A0A087ZVH4	DUF89 domain-containing protein OS=Apis mellifera OX=7460 GN=PANK4 PE=4 SV=1		0	FALSE	7.883	2	1	3	1	784	88.5	7.02			3.61						3.31					3.61									1						1					1
FALSE	High	Master Protein	A0A088A6F7	DUF953 domain-containing protein OS=Apis mellifera OX=7460 GN=cl PE=4 SV=1		0	FALSE	5.504	14	1	1	1	126	14.6	5.55											3.4																				1
FALSE	High	Master Protein	A0A088A1V1	Dynamin-type G domain-containing protein OS=Apis mellifera OX=7460 GN=410263 PE=3 SV=1		0	FALSE	21.983	8	6	12	6	766	87.7	7.03	4.15	0	2.01	0				2.23			2.37	0	2.37				2.65				3	1	1	1				2			1	1	1
FALSE	High	Master Protein	A0A088AMM2	Dynamin-type G domain-containing protein OS=Apis mellifera OX=7460 GN=opa1-like PE=3 SV=1		0	FALSE	73.834	22	15	44	15	976	113.6	8.47	17.01	24.57	4.05		3.23	2.01	12.2	8.86				2.58	2.08			7.76	17.86	7.89	0		7	6	2		1	1	5	3				1	1
FALSE	High	Master Protein	A0A087ZRS3	Dynamin-type G domain-containing protein OS=Apis mellifera OX=7460 PE=3 SV=1		0	FALSE	115.523	26	18	183	18	868	97.9	4.44	24.42	25.16	44.05	8.34	37.09	23.21	21.32	40.87	18.21	84.4	31.98	34.16	28.32	7.46	0	6.85	27.06	15.7	2.3		6	6	10	3	9	7	7	10	7	15	9	9	8	2
FALSE	High	Master Protein	A0A087ZYC6	Dynein light chain OS=Apis mellifera OX=7460 GN=DLC-D PE=3 SV=1		0	FALSE	30.05	51	4	49	4	89	10.4	7.37	1.63	8.64	3.2	0	6.01	11.92	1.64	1.77		4.32	12.34	13.58	3.88		2.19		11.41	3.38	6.52	0	1	3	1	1	2	4	1	1		2	3	3	1
FALSE	High	Master Protein	A0A088ADJ6	Dynein light chain roadblock OS=Apis mellifera OX=7460 GN=robl PE=3 SV=1		0	FALSE	5.135	12	1	2	1	97	10.8	6.55																	2.76	2.61
FALSE	High	Master Protein	A0A088A8B6	Dynein light intermediate chain OS=Apis mellifera OX=7460 GN=Dlic PE=3 SV=1		0	FALSE	23.476	14	4	7	4	480	53.4	5.81	3.75	3.55	4.24				4.61				5.87					1.61					1	1	1				1				2
FALSE	High	Master Protein	A0A088AKW6	DZF domain-containing protein OS=Apis mellifera OX=7460 GN=Zn72D PE=4 SV=1		0	FALSE	80.433	14	10	48	10	997	108.1	9.04	9.43	10.99	3.08				4.3			2.3	11.46	9.06				2.79	19.05	11.94	10.06		5	3	2				2			1	4	5
FALSE	High	Master Protein	A0A088A2N6	E3 ubiquitin-protein ligase OS=Apis mellifera OX=7460 GN=Nedd4 PE=4 SV=1		0	FALSE	4.345	1	1	2	1	840	96.5	5.41	0	0																			1	1
FALSE	High	Master Protein	A0A093S541	Efflux pump membrane transporter OS=Pectobacterium carotovorum subsp. carotovorum OX=555 GN=KP17_19680 PE=3 SV=1		0.007	FALSE	2.46	1	1	1	1	1042	112.4	5.52																				2.26
FALSE	High	Master Protein	A0A2G4QAD1	Efflux pump membrane transporter OS=Serratia marcescens OX=615 GN=CS371_17095 PE=3 SV=1		0	FALSE	22.98	6	4	5	4	1048	112.9	6.09																				17.49
FALSE	High	Master Protein	A0A088AUN3	EF-hand domain-containing protein OS=Apis mellifera OX=7460 GN=LOC552747 PE=4 SV=1		0	FALSE	28.343	17	6	6	6	526	59.8	4.5											5.06	3.45						0	2.41												3	1
FALSE	High	Master Protein	A0A088AAX0	EF-hand domain-containing protein OS=Apis mellifera OX=7460 GN=Manf PE=4 SV=1		0	FALSE	4.842	11	2	3	2	175	20.1	7.52						0						0							1.92							1						1
FALSE	High	Master Protein	A0A087ZRZ9	EF-hand domain-containing protein OS=Apis mellifera OX=7460 PE=4 SV=1		0	FALSE	6.478	24	3	9	3	126	15	9.33				0		0					5.91		1.76						0					1		1					2		1
FALSE	High	Master Protein	A0A088AA85	eIF2B_5 domain-containing protein OS=Apis mellifera OX=7460 PE=4 SV=1		0	FALSE	21.645	26	7	11	7	335	38.3	7.64							0	2.32	0	0	3.06			0	0		2.98		0								1	1	1	2	1			1
FALSE	High	Master Protein	A0A0B4J2M5	Electron transfer flavoprotein-ubiquinone oxidoreductase OS=Apis mellifera OX=7460 GN=Etfdh PE=4 SV=1		0	FALSE	71.034	34	15	77	15	606	67	7.53	23.52	8.79	20.03	4.98	9.48	13.24	21.63	18.84	18.76	2.29	21.29	12.27	1.79			2.71	2	0	2		8	3	6	3	3	6	6	7	6	1	8	5	1
FALSE	High	Master Protein	A0A087ZS68	ELFV_dehydrog domain-containing protein OS=Apis mellifera OX=7460 GN=Gdh PE=3 SV=1		0	FALSE	344.962	67	31	755	31	553	61.6	8.09	104.06	170.38	154.11	49.01	21.54	257.26	114.33	118.9	97.09	85.24	163.34	153.17	70.73	61.11	0	69.38	119.45	104.15	132.2	0	21	26	27	13	7	27	22	25	23	19	25	27	16	18
FALSE	High	Master Protein	A0SU68	Elongation factor 1-alpha (Fragment) OS=Apis mellifera OX=7460 GN=EF-1a-F2 PE=4 SV=1		0	FALSE	170.827	56	10	597	1	172	19	6.79	149.62	119.33	122.62	76.61	72.12	90.01	78.67	75.9	73.57	84.45	139.16	111.5	79.6	104.02	43.43	111.59	93.7	47.88	150.35	10.56	8	8	9	8	8	8	7	8	8	8	9	7	8	8
FALSE	High	Master Protein	A0A087ZRE3	Elongation factor 1-alpha OS=Apis mellifera OX=7460 GN=EF1a-F2 PE=3 SV=1		0	FALSE	288.869	55	19	1089	2	461	50.3	9.03	260.3	203.42	163.37	112.37	105.9	150.39	128.78	112.44	118.23	109.55	246.82	207.72	142.93	153.79	88.75	193.94	344.39	190.13	360.96	105.27	15	15	14	14	15	14	14	14	14	14	16	14	14	15
FALSE	High	Master Protein	P19039	Elongation factor 1-alpha OS=Apis mellifera OX=7460 PE=3 SV=1		0	FALSE	151.643	54	16	598	5	461	50.5	9.09	113.49	91.62	70.35	54.74	63.98	74.34	52.3	56.94	47.07	76.22	114.45	92.73	67.43	67.57	46.54	32.23	51.95	35.13	104.99	99.11	11	11	10	10	11	10	10	10	8	12	13	10	10	12
FALSE	High	Master Protein	A0A1B4XKR1	Elongation factor G OS=Enterococcus faecalis OX=1351 GN=fusA PE=3 SV=1		0.001	FALSE	3.775	3	1	1	1	693	76.6	4.89														2.68																				1
FALSE	High	Master Protein	C5CC67	Elongation factor G OS=Micrococcus luteus (strain ATCC 4698 / DSM 20030 / JCM 1464 / NBRC 3333 / NCIMB 9278 / NCTC 2665 / VKM Ac-2230) OX=465515 GN=fusA PE=3 SV=1		0	FALSE	7.94	3	2	3	1	704	77.5	5.02														5.75	2.02																			2
FALSE	High	Master Protein	A0A093SUC9	Elongation factor G OS=Pectobacterium carotovorum subsp. carotovorum OX=555 GN=fusA PE=3 SV=1		0	FALSE	130.697	42	21	97	4	704	77.4	5.3	12.81			3.8	11.22	4.21			29.81	3.21	2.49			61.36	50.81					87.33	3			2	4	2			9	1	1			16
FALSE	High	Master Protein	A0A0G8B4Q3	Elongation factor G OS=Serratia marcescens OX=615 GN=fusA PE=3 SV=1		0	FALSE	189.427	57	28	130	11	704	77.5	5.3	8.84			3.8	20.61	4.21			35.23	3.21	2.49			57.84	75.62		2.13			162.09	2			2	5	2			10	1	1			14
FALSE	High	Master Protein	A0A087ZTR9	Elongation factor G, mitochondrial OS=Apis mellifera OX=7460 GN=LOC411351 PE=3 SV=1		0	FALSE	10.835	3	2	8	2	744	84.5	7.11	7.13							2.42					2.38				2.34	2.37	2.31		2							1					1
FALSE	High	Master Protein	A0A080UYV2	Elongation factor P OS=Serratia marcescens OX=615 GN=efp PE=3 SV=1		0	FALSE	6.943	6	1	9	1	188	20.7	5.27					4.99				5.65		1.95			6.54	5.1										1				1		1			1
FALSE	High	Master Protein	A0A1Q5VYZ2	Elongation factor Ts OS=Serratia marcescens OX=615 GN=tsf PE=3 SV=1		0	FALSE	41.76	43	10	23	10	283	30.4	5.21									6.96					4.71	2.19					29.29									3					4
FALSE	High	Master Protein	A0A088A1L8	Elongation factor Ts, mitochondrial OS=Apis mellifera OX=7460 GN=LOC408352 PE=3 SV=1		0	FALSE	47.655	45	9	46	9	302	34	6.71	17.82	4.81	4.76	1.76		4.52	5.51	5.09		3.02	17.17	9.51	8.35			5.78	8.94	1.68	2.62		4	3	1	1		2	2	2		1	6	3	3
FALSE	High	Master Protein	D1MWN8	Elongation factor Tu (Fragment) OS=Pectobacterium carotovorum subsp. carotovorum OX=555 GN=tuf PE=4 SV=1		0	FALSE	139.729	57	12	256	3	257	28.7	4.89	21.85		7.35	12.74	46.22	20.69			41.2	16.37	7.93			95.39	82.61		3.8	5.77		427.45	4		3	2	9	5			5	3	1			11
FALSE	High	Master Protein	A0A087ZW54	Elongation factor Tu OS=Apis mellifera OX=7460 GN=LOC408328 PE=3 SV=1		0	FALSE	381.548	75	31	1279	29	469	52.4	7.96	269.95	239.91	222.66	168.21	140.41	120.37	249.06	201.5	150.44	117.19	217.67	173.41	217.71	139.65	43.05	114.09	204.07	134.54	126.1	27.99	27	25	24	23	18	19	25	25	24	19	23	20	23	19
FALSE	High	Master Protein	A0A1B4XKS5	Elongation factor Tu OS=Enterococcus faecalis OX=1351 GN=tuf PE=3 SV=1		0	FALSE	49.073	24	7	74	6	395	43.4	4.83	8.24		14.73	5.75	20.67	14.28		3.16	41.63	7.44	12.53			48.55	28.08		0			25.87	1		1	1	1	1		1	4	1	1			5
FALSE	High	Master Protein	V5T6M5	Elongation factor Tu OS=Lactobacillus mellis OX=1218508 GN=tuf PE=3 SV=1		0	FALSE	97.837	53	13	115	9	417	46.2	4.97	14.09	12.9	32.98	8.13	10.92	7.89	8.4	40.55	20.93	9.09	6.52	8.75	6.47	18.6	18.2	4.26	4.73	15.78	4.55	22.67	3	2	4	1	3	1	2	10	2	1	1	1	1	4
FALSE	High	Master Protein	A0A0J5CD52	Elongation factor Tu OS=Serratia marcescens OX=615 GN=tuf PE=3 SV=1		0	FALSE	248.048	70	21	444	1	394	43.2	5.31	41.53		22.09	20.85	90.79	37.7		3.16	120.45	29.91	27.05			147.15	172.26		3.8	1.95		634.52	9		4	5	13	7		1	10	6	4			14
FALSE	High	Master Protein	A0A1C3HJY9	Elongation factor Tu OS=Serratia marcescens OX=615 GN=tufA_1 PE=3 SV=1		0	FALSE	255.887	76	21	445	1	394	43.2	5.26	41.53		22.09	20.85	90.79	37.7		3.16	120.45	29.91	27.05			147.15	172.26		3.8	1.95		635.9	9		4	5	13	7		1	10	6	4			14
FALSE	High	Master Protein	V5RJB0	Elongation factor Tu OS=Spiroplasma apis B31 OX=1276258 GN=tufA PE=3 SV=1		0	FALSE	45.732	13	4	128	2	395	43	5.31	16.75	8.83	28.69	13.88	27.9	22.17	6.36	7.78	47.46	22.38	19.05	8.75	6.47	35.76	35.51		4.73	8.21	4.55	20.82	2	1	3	2	3	2	1	2	3	3	2	1	1	2
FALSE	High	Master Protein	A0A088AIA2	Elongation of very long chain fatty acids protein OS=Apis mellifera OX=7460 GN=LOC413789 PE=3 SV=1		0	FALSE	16.417	4	1	18	1	331	38.9	9.11		6.75	6.78		3.36		7.3	1.88				2.26	6.38			3.02	10.64	5.59				1	1		1		1	1				1	1
FALSE	High	Master Protein	A0A088AIA5	Elongation of very long chain fatty acids protein OS=Apis mellifera OX=7460 PE=3 SV=1		0	FALSE	6.32	6	1	1	1	214	25.3	9.45																			3.05
FALSE	High	Master Protein	A0A088AG65	EMC1_C domain-containing protein OS=Apis mellifera OX=7460 PE=4 SV=1		0	FALSE	31.502	11	8	22	8	947	106.2	8.44	4.54	2.02	2.26	3.7	2.01	2.19	2.17	2.41	1.73		2.07	4.34	5.64	0			2.7		2.31		3	2	1	2	1	1	2	1	1		1	2	2	1
FALSE	High	Master Protein	A0A0U6WSL6	Enamine/imine deaminase OS=Serratia marcescens OX=615 GN=ridA PE=4 SV=1		0	FALSE	9.613	17	2	4	2	128	13.5	5.03																				10.84
FALSE	High	Master Protein	A0A2G4QS37	Endonuclease 8 OS=Serratia marcescens OX=615 GN=nei PE=3 SV=1		0.006	FALSE	2.597	4	1	1	1	263	29.9	8.72									3.12																				1
FALSE	High	Master Protein	A0A088AST9	Enolase OS=Apis mellifera OX=7460 PE=4 SV=1		0	FALSE	206.293	61	16	434	16	366	39.8	7.05	125.62	38.95	17.91	14.2	3.01	94.21	32.03	45.76	11.42	45.04	135.3	157.78	47.01	72.13		71.45	89.62	39.93	166.75		14	10	6	6	3	13	9	10	4	13	15	14	8	10
FALSE	High	Master Protein	A0A1B4XPT3	Enolase OS=Enterococcus faecalis OX=1351 GN=eno PE=3 SV=1		0	FALSE	40.3	28	7	10	5	432	46.5	4.68														23.56	1.79																			6
FALSE	High	Master Protein	V5T7F0	Enolase OS=Lactobacillus mellis OX=1218508 GN=eno2 PE=3 SV=1		0	FALSE	18.307	8	2	3	1	431	46.7	4.94								4.45						4.7														1						1
FALSE	High	Master Protein	A0A093SNW0	Enolase OS=Pectobacterium carotovorum subsp. carotovorum OX=555 GN=eno PE=3 SV=1		0	FALSE	64.964	26	8	73	2	431	45.2	5.3	16.08		1.99		7.71	17.3			29.14		11.19			39.19	33.99					55.32	4		1		3	5			7		4			6
FALSE	High	Master Protein	A0A086FND6	Enolase OS=Serratia marcescens OX=615 GN=eno PE=3 SV=1		0	FALSE	78.656	36	10	99	4	431	45.4	5.38	13.72		1.99		8.12	18.73			28.53	0	16.42			44.8	37.3					88.02	4		1		3	5			7	1	6			7
FALSE	High	Master Protein	A0A093STM5	Enoyl-[acyl-carrier-protein] reductase [NADH] OS=Pectobacterium carotovorum subsp. carotovorum OX=555 GN=KP17_02455 PE=3 SV=1		0.002	FALSE	3.424	5	1	1	1	262	27.9	5.44									2.64																				1
FALSE	High	Master Protein	A0A0U6C7J1	Enterobactin outer-membrane receptor OS=Serratia marcescens OX=615 GN=fepA PE=3 SV=1		0	FALSE	55.814	12	6	14	1	758	82.6	6.64															3.26					42.11
FALSE	High	Master Protein	A0A087ZYC9	ENTH domain-containing protein OS=Apis mellifera OX=7460 GN=lap PE=4 SV=1		0	FALSE	8.958	3	2	8	2	890	93.6	7.91	2.12	4.22	0				0			3.42	2.53	3.36									1	2	1				1			1	1	1
FALSE	High	Master Protein	A0A088AQL3	ENTH domain-containing protein OS=Apis mellifera OX=7460 GN=lqfR PE=4 SV=1		0	FALSE	15.465	3	3	14	3	1443	165.4	5.53	4	2.46	1.87			4.22			2.43		5.12	2.63	2.48	2.15			2.6				2	1	1			2			1		2	1	1	1
FALSE	High	Master Protein	A0A088ATX9	ENTH domain-containing protein OS=Apis mellifera OX=7460 PE=4 SV=1		0	FALSE	4.129	2	1	7	1	569	62.4	5.52	0	1.78					0				2.2	3.99	1.94								1	1					1				1	1	1
FALSE	High	Master Protein	A0A0F6KM83	Envelope stress response membrane protein PspB OS=Serratia marcescens OX=615 GN=pspB PE=4 SV=1		0	FALSE	14.206	40	2	2	2	75	8.9	6.52																				6.99
FALSE	High	Master Protein	A0A088AKI9	Epimerase domain-containing protein OS=Apis mellifera OX=7460 GN=Gmer PE=3 SV=1		0	FALSE	24.383	15	4	17	4	322	36.8	7.05	8.03					2.46	2.22				3.56	3.19	2.88	2.83		4.82	3.84		4.94		4					1	1				2	1	1	2
FALSE	High	Master Protein	A0A088ANF9	Epimerase domain-containing protein OS=Apis mellifera OX=7460 GN=LOC412149 PE=4 SV=1		0	FALSE	5.227	4	1	1	1	372	41.6	6.15											3.14																				1
FALSE	High	Master Protein	A0A087ZQU6	Epimerase domain-containing protein OS=Apis mellifera OX=7460 PE=4 SV=1		0	FALSE	170.266	56	21	412	21	398	45.9	8.85	120.68	100.22	70.91	43.51	64.41	55.56	99.11	74.27	38.76	63.27	59.77	67.25	58.25	31.31	20.5	18.31	43.14	22.47	5.71	8.37	19	12	9	9	10	12	17	13	7	10	12	13	9	10
FALSE	High	Master Protein	A0A087ZVE8	Epoxide hydrolase OS=Apis mellifera OX=7460 GN=LOC406152 PE=3 SV=1		0	FALSE	72.97	34	11	197	11	456	52	8.35	31.39	51.76	31.64	8.48	25.03	25.2	17.67	33.94	12.65	54.63	40.81	30.52	17.14	21.07	6.12	8.67	23.99	20	11.84		9	10	8	2	7	7	4	8	3	10	8	4	4	6
FALSE	High	Master Protein	A0A088A8F3	ER membrane protein complex subunit 3 OS=Apis mellifera OX=7460 GN=LOC551505 PE=3 SV=1		0.009	FALSE	2.249	3	1	4	1	252	28.6	8.34	1.88	3.72											0								1	1											1
FALSE	High	Master Protein	A0A088A8C3	ER membrane protein complex subunit 4 OS=Apis mellifera OX=7460 GN=LOC412349 PE=3 SV=1		0	FALSE	15.267	19	2	10	2	175	19.5	9.44		5.74	7.26	4.07	6.5		7.53				5.34		2.56									1	2	1	2		2				1		1
FALSE	High	Master Protein	A0A087ZZH5	eRF1_1 domain-containing protein OS=Apis mellifera OX=7460 PE=4 SV=1		0	FALSE	11.056	11	3	6	3	264	29.5	5.72	3.37					0				3.92	7.22										1					1				1	3
FALSE	High	Master Protein	A0A0P0QGZ7	Erythritol/L-threitol dehydrogenase OS=Serratia marcescens OX=615 GN=AR325_19130 PE=3 SV=1		0	FALSE	11.165	15	4	5	4	355	39	5.3					0															9.1					1
FALSE	High	Master Protein	A0A221HCG8	Erythritol/L-threitol dehydrogenase OS=Serratia marcescens OX=615 GN=BVG84_15305 PE=3 SV=1		0	FALSE	23.911	19	6	11	6	370	40.3	5.73															0					25.2
FALSE	High	Master Protein	A0A088A7F1	ETF domain-containing protein OS=Apis mellifera OX=7460 GN=LOC410308 PE=4 SV=1		0	FALSE	105.847	61	13	146	13	253	27.6	6.93	55.64	13.63	8.9	2.91	3.26	17.02	18.5	25.39	1.74		28.15	31.41	8.51	12.03		33.53	31.18	26.68	43.15		11	7	3	2	1	6	6	8	1		7	7	3	4
FALSE	High	Master Protein	A0A088A872	ETF domain-containing protein OS=Apis mellifera OX=7460 GN=LOC551710 PE=4 SV=1		0	FALSE	131.659	61	16	168	16	333	35.4	8.32	64.18	40.76	21.19	5.33	2.86	29.11	36.97	37.99	11.96	3.96	40.72	33.66	37.76	31.25	1.88	27.09	25.64	20.36	37.69		12	8	5	2	1	6	7	9	4	1	8	8	8	9
FALSE	High	Master Protein	A0A0G3SLE5	Ethanolamine utilization protein OS=Serratia marcescens OX=615 GN=ERS381490_04481 PE=4 SV=1		0	FALSE	4.231	14	1	1	1	121	13.2	4.81																				2.52
FALSE	High	Master Protein	A0A088AFA9	ETS domain-containing protein OS=Apis mellifera OX=7460 PE=3 SV=1		0	FALSE	155.319	21	21	146	21	1075	121.7	6.67	58.73	8.12			1.75	27.59	7.97	2.35			69.48	68.63	14.62	4.43	0	45.4	34.97	15.01	21.46		12	3			1	9	3	1			15	16	5	2
FALSE	High	Master Protein	A0A088A560	Eukaryotic translation initiation factor 3 subunit A OS=Apis mellifera OX=7460 GN=eIF3-S10 PE=3 SV=1		0	FALSE	66.042	20	15	34	15	1098	129.8	8.84	7.95	3.84	1.88			2.06	16.3				12.87	10.63	8.03		1.68	0	1.92	1.74	4.49		5	1	2			1	5				5	3	3
FALSE	High	Master Protein	A0A088AC80	Eukaryotic translation initiation factor 3 subunit B OS=Apis mellifera OX=7460 GN=eIF3-S9 PE=3 SV=1		0	FALSE	59.235	23	12	58	12	702	81.5	5.55	11.87	14.68	2.15	0	2.54	9.13	23.28	2.88		2.22	25.06	18.34	12.78	2.73	1.8	0	4.91	2.3			3	5	1	1	1	3	6	1		1	8	5	3	1
FALSE	High	Master Protein	A0A087ZST3	Eukaryotic translation initiation factor 3 subunit C OS=Apis mellifera OX=7460 GN=eIF3-S8 PE=3 SV=1		0	FALSE	42.059	12	9	25	9	892	104.3	5.83	6.69	5.06	2.06			1.75	7.26				6.99	5.4	2.38			0	4.17	0	0		3	3	1			1	2				3	2	1
FALSE	High	Master Protein	A0A088AEQ4	Eukaryotic translation initiation factor 3 subunit D OS=Apis mellifera OX=7460 GN=eIF-3p66 PE=3 SV=1		0	FALSE	17.294	10	4	14	4	562	64.6	5.86	2.3	2.58									8.31	10.12			2.8		5.7	1.85	3.56		1	1									3	3
FALSE	High	Master Protein	A0A088AQJ3	Eukaryotic translation initiation factor 3 subunit E OS=Apis mellifera OX=7460 GN=LOC551242 PE=3 SV=1		0	FALSE	29.045	18	7	25	7	440	51.6	6.07	5.36	10.24	9.82		0		8.3			2.07	4.84	2.36	2.05				1.95	2.85	6.97		2	2	2		1		3			1	2	1	1
FALSE	High	Master Protein	A0A088A223	Eukaryotic translation initiation factor 3 subunit F OS=Apis mellifera OX=7460 GN=LOC413145 PE=3 SV=1		0	FALSE	60.599	42	8	35	8	285	31.4	5.74	11.82	9.78			2.34	9.25	11.67				16.96	12.38	3.18	2.72		6.43	2.71	2.26	5.35		3	3			1	3	4				5	5	2	1
FALSE	High	Master Protein	A0A088AKE0	Eukaryotic translation initiation factor 3 subunit G OS=Apis mellifera OX=7460 GN=LOC408386 PE=3 SV=1		0	FALSE	7.154	9	1	3	1	285	31.8	8.06	2.11										3.52	3.36									1										1	1
FALSE	High	Master Protein	A0A088A4N3	Eukaryotic translation initiation factor 3 subunit H OS=Apis mellifera OX=7460 PE=3 SV=1		0	FALSE	21.019	19	5	11	5	313	36.2	5.87	3.51	2.9				2.23					9.08	3.54					5.21		1.72		1	1				1					3	1
FALSE	High	Master Protein	A0A088A549	Eukaryotic translation initiation factor 3 subunit I OS=Apis mellifera OX=7460 GN=Trip1 PE=3 SV=1		0	FALSE	28.32	14	4	21	4	326	36.6	6.8	2.56	2.22				2.04	2.35	0		0	8.43	2.73	4.46				4.1	3.26	4.74		1	1				2	2	1		1	3	2	2
FALSE	High	Master Protein	A0A088A861	Eukaryotic translation initiation factor 3 subunit J OS=Apis mellifera OX=7460 GN=Adam PE=3 SV=1		0	FALSE	10.947	14	3	6	3	236	27.4	4.96			0								2.5	7.08							1.96				1								1	3
FALSE	High	Master Protein	A0A088ATI4	Eukaryotic translation initiation factor 3 subunit K OS=Apis mellifera OX=7460 GN=LOC551960 PE=3 SV=1		0	FALSE	20.453	18	3	23	3	216	24.8	5.82	0	3.39					5.74				4.01	3.79	1.68			2.14	2.65	2.64	2.02		1	2					2				2	2	2
FALSE	High	Master Protein	A0A088AQX2	Eukaryotic translation initiation factor 3 subunit L OS=Apis mellifera OX=7460 GN=LOC552056 PE=3 SV=1		0	FALSE	37.851	24	9	22	9	538	63.4	6.33	4.63	5.24	0								4.48	1.98	2.56	2.55	0	0	5.56	0	3.82		2	2	1								2	2	3	1
FALSE	High	Master Protein	A0A088A9L4	Eukaryotic translation initiation factor 3 subunit M OS=Apis mellifera OX=7460 GN=Tango7 PE=3 SV=1		0	FALSE	30.401	24	6	21	6	391	44.4	5.59	6.81	11.16	3.76		0	2.78	7.86			2.72		4.54				2.33	4.33	3.28	4.34		1	2	1		1	1	1			1		2
FALSE	High	Master Protein	A0A088ALS2	Eukaryotic translation initiation factor 5A OS=Apis mellifera OX=7460 GN=LOC552572 PE=3 SV=1		0	FALSE	49.507	44	6	47	6	160	17.6	5.4	17.63	11.54	3.39	3.01		17.72		2.6		3.76	28.04	10.38	5.59	2.68		8.75	2.93		13.92		3	3	1	1		4		1		1	4	2	1	2
FALSE	High	Master Protein	A0A221H962	EvpB family type VI secretion protein OS=Serratia marcescens OX=615 GN=BVG84_09410 PE=4 SV=1		0	FALSE	4.375	3	2	2	1	515	57.9	5.14														1.65						2														1
FALSE	High	Master Protein	A0A0M4RK01	EvpB family type VI secretion protein OS=Serratia marcescens OX=615 GN=BVG84_12425 PE=4 SV=1		0	FALSE	31.313	19	7	12	6	501	56.6	5.17																				31.4
FALSE	High	Master Protein	A0A0G8BED5	EvpB family type VI secretion protein OS=Serratia marcescens OX=615 GN=BVG93_12965 PE=4 SV=1		0	FALSE	15.47	9	4	5	4	508	57.7	6.04																				14.28
FALSE	High	Master Protein	Q59933	Extracellular lipase OS=Serratia marcescens OX=615 GN=lipA PE=1 SV=1		0	FALSE	67.156	28	12	21	1	613	64.8	4.73																				64.98
FALSE	High	Master Protein	A0A088AI93	FA_desaturase domain-containing protein OS=Apis mellifera OX=7460 GN=LOC551527 PE=3 SV=1		0.002	FALSE	3.394	3	1	1	1	368	44	8.92																			0
FALSE	High	Master Protein	A0A088ASN0	FAA_hydrolase domain-containing protein OS=Apis mellifera OX=7460 PE=4 SV=1		0	FALSE	89.327	74	12	192	12	249	27.5	5.34	61.53	21.19	25.56	2.17	2.85	41.37	28.08	27.26	6.48	4.93	42.83	45.99	23.01	11.81		42.83	36.22	49.45	28.23		10	4	6	1	1	8	7	9	2	2	7	8	5	3
FALSE	High	Master Protein	A0A088AE74	FABP domain-containing protein OS=Apis mellifera OX=7460 GN=Fabp PE=3 SV=1		0	FALSE	26.647	32	4	10	1	133	15.2	8.37											1.98	2.21					2.96	3.21	14.49												1	1
FALSE	High	Master Protein	A9ZSY2	Facilitated trehalose transporter Tret1 OS=Apis mellifera ligustica OX=7469 GN=Tret1 PE=1 SV=1		0	FALSE	28.926	10	4	26	3	502	55.5	8.68		2.41	5.96	0	3.52		10.32	6.21	11.83	3.55	3.77	3.75	3.72	9.5				3.25	5.26			1	2	1	1		2	3	3	1	1	1	1	2
FALSE	High	Master Protein	A0A088A627	F-actin-capping protein subunit alpha OS=Apis mellifera OX=7460 GN=LOC552486 PE=3 SV=1		0	FALSE	54.086	43	8	24	8	288	32.8	5.55	4.31	7.1	1.62			4		4.18			9.17	11.64				1.68	4.82	6.56	5.63		1	3	1			2		1			3	3
FALSE	High	Master Protein	A0A088ALS0	F-actin-capping protein subunit beta OS=Apis mellifera OX=7460 GN=LOC409581 PE=3 SV=1		0	FALSE	51.027	48	9	33	9	273	30.8	5.72	3.96	16.65	5.84	2.91	2.34	5.83	3.62	6.07	7.59	6.47	3.02	10.37				2.99	10.16	9.1			1	5	2	1	1	2	1	2	3	3	1	3
FALSE	High	Master Protein	A0A087ZYD0	FAD-binding PCMH-type domain-containing protein OS=Apis mellifera OX=7460 PE=4 SV=1		0	FALSE	29.341	5	4	19	4	1257	140.8	7.3	6.15	5.99	5.52		2.54						17.06	12.83									2	2	1		1						4	3
FALSE	High	Master Protein	A0A088A7Z4	FAD-binding PCMH-type domain-containing protein OS=Apis mellifera OX=7460 PE=4 SV=1		0	FALSE	88.54	51	13	72	13	470	52.3	7.96	62.82	9.41	13.81			4.11	26.85	14.21			19.6	25.14	4.5	2		5.03	2.08	14.47			10	3	4			2	8	4			6	8	1	2
FALSE	High	Master Protein	A0A2I1L1Z1	FAD-dependent oxidoreductase OS=Enterococcus faecalis OX=1351 GN=CYJ51_03755 PE=4 SV=1		0	FALSE	13.294	6	3	3	3	447	49.5	4.93														8.26																				3
FALSE	High	Master Protein	A0A088A0W2	FAS1 domain-containing protein OS=Apis mellifera OX=7460 PE=4 SV=1		0	FALSE	9.994	5	1	1	1	290	32.5	7.34																	3.03
FALSE	High	Master Protein	A0A088AG10	FAST_2 domain-containing protein OS=Apis mellifera OX=7460 PE=4 SV=1		0	FALSE	23.793	13	6	22	6	525	61.1	9.06	9.53	4.77	1.98			0	7.69	1.67			1.89	0	2.3	1.8		0	4.24	2.74			4	2	2			1	3	1			1	1	2	1
FALSE	High	Master Protein	Q76LA4	Fatty acid binding protein OS=Apis mellifera OX=7460 GN=FABP PE=2 SV=1		0	FALSE	27.982	32	4	10	1	132	15	6.74											1.98	2.21					2.96	3.21	14.64												1	1
FALSE	High	Master Protein	A0A0P0Q9J6	Fatty acid oxidation complex subunit alpha OS=Serratia marcescens OX=615 GN=fadB PE=3 SV=1		0	FALSE	105.773	32	16	42	16	729	78.9	6.58									4.03					6.22	1.71					118.29									2					2
FALSE	High	Master Protein	A0A2G4P9X7	Fatty acid oxidation complex subunit alpha OS=Serratia marcescens OX=615 GN=fadJ PE=3 SV=1		0	FALSE	34.162	16	8	9	8	721	77.9	8.94																				24.68
FALSE	High	Master Protein	A0A088AU73	Fatty acyl-CoA reductase OS=Apis mellifera OX=7460 GN=100576414 PE=3 SV=1		0	FALSE	30.841	15	6	9	6	509	58.9	9.03						7.57													2.44							5
FALSE	High	Master Protein	D9MWM7	Fatty acyl-CoA reductase OS=Apis mellifera OX=7460 GN=FAR1 PE=2 SV=1		0	FALSE	198.021	64	22	312	22	516	59.1	8.29	34.78	165.63	94.54	6.4	24.83	7.68	38.33	46.63	8.64	47.43	18.26	45.85	40.08	16.91	1.93	16.19	62.28	23.66	9.32	0	9	22	18	3	9	3	9	11	3	12	4	13	9	5
FALSE	High	Master Protein	D9MX52	Fatty acyl-CoA reductase OS=Apis mellifera OX=7460 GN=LOC411983 PE=2 SV=1		0	FALSE	88.725	37	17	73	17	541	62	8.18	9.39	34.94	20.9	0	0	2.15	4.11	3.01		4.24	14		27.3			7.2	9.24	7.52	26.32		3	12	7	1	1	1	1	1		2	5		8
FALSE	High	Master Protein	A0A088AD05	Fatty acyl-CoA reductase OS=Apis mellifera OX=7460 PE=3 SV=1		0	FALSE	66.199	40	12	95	12	382	44	9.52	14.73	20.81	10.74	0	10.59	2.34	10.93		0	10.67	2.55	14.97	9.28	2.08	0	4.18	20.93	8.95	7.44		6	7	6	3	6	3	5		1	3	4	6	4	1
FALSE	High	Master Protein	A0A088AD07	Fatty acyl-CoA reductase OS=Apis mellifera OX=7460 PE=3 SV=1		0	FALSE	21.703	11	4	19	4	516	59.8	8.02		23.13	6.57		2.6		7.59	3.49		2.71		5.97	6.67				2.44					4	2		1		2	1		1		2	2
FALSE	High	Master Protein	A0A1C3HMJ0	Fe(3+)-pyochelin receptor OS=Serratia marcescens OX=615 GN=fptA PE=3 SV=1		0	FALSE	16.536	6	3	3	3	712	78.4	6.89																				9.22
FALSE	High	Master Protein	A0A0A5L752	Fe/S biogenesis protein NfuA OS=Serratia marcescens OX=615 GN=nfuA PE=3 SV=1		0	FALSE	5.396	6	1	2	1	191	21.2	4.68																				6.29
FALSE	High	Master Protein	A0A088AHC4	Fe-ADH domain-containing protein OS=Apis mellifera OX=7460 PE=4 SV=1		0	FALSE	22.78	29	4	22	2	149	16.6	9.25	8.3	2.93	5.61								2.14			5.42		4.3	6.15	5.49	13.96		3	1	2								1			2
FALSE	High	Master Protein	A0A088AHC5	Fe-ADH domain-containing protein OS=Apis mellifera OX=7460 PE=4 SV=1		0	FALSE	48.142	42	8	38	7	178	19.7	7.61	16.92	2.65	2.63	2.23		2.56	1.67	3.3	2.3		10.08	2.44	2.48	2.45		2.37	10.86		19.63		5	2	2	1		1	1	2	1		3	1	1	1
FALSE	High	Master Protein	A0A088AHC6	Fe-ADH domain-containing protein OS=Apis mellifera OX=7460 PE=4 SV=1		0	FALSE	29.418	12	4	43	1	431	47.5	7.65	12.87	7.71	8.06	2.23		2.56	2.79	5.2	2.3		12.54	5.36	2.48	8.77		4.79	8.12	2.72	13.99		3	3	3	1		1	1	1	1		2	2	1	3
FALSE	High	Master Protein	A0A087ZW75	FERM domain-containing protein OS=Apis mellifera OX=7460 PE=4 SV=1		0	FALSE	14.915	2	2	13	2	1366	156.5	8.84	2.5	2.25	2.4				5.14	0			0	0	0			0					1	1	1				2	1			1	1	2
FALSE	High	Master Protein	A0A087ZZ33	FERM domain-containing protein OS=Apis mellifera OX=7460 PE=4 SV=1		0	FALSE	99.758	26	17	111	17	921	104.9	8.28	11.1	28.64	13.73	8.54	11.57	5.84	30.48	7.79	2.16	13.64	25.39	19.7	22.55	7.46	1.9	2.43	34.98	19	18.11		3	8	5	3	5	2	8	5	1	5	9	6	7	3
FALSE	High	Master Protein	A0A088A9A9	FERM domain-containing protein OS=Apis mellifera OX=7460 PE=4 SV=1		0	FALSE	205.616	47	29	346	29	632	74.6	6.28	25.97	39.83	47.56	27.54	29.01	73.42	7.26	22.49	32	42.14	52.53	80.6	36.36	50.26	17.17	24.81	47.99	39.91	45.69	3.9	8	15	11	10	9	18	2	8	10	10	17	20	16	16
FALSE	High	Master Protein	A0A088AEI6	FERM domain-containing protein OS=Apis mellifera OX=7460 PE=4 SV=1		0	FALSE	523.365	51	69	483	69	2042	217.9	5.81	106.32	147.23	36.86	34.82	37.82	26.63	158.74	27.28	48.63	2.76	81.86	98.04	83.02	9.63	15.47	38.02	167.23	79.53	46.73		28	38	16	19	16	13	37	13	20	1	27	29	24	6
FALSE	High	Master Protein	A0A084WVC3	Ferric uptake regulation protein OS=Serratia marcescens OX=615 GN=fur PE=3 SV=1		0	FALSE	17.934	27	3	8	3	148	16.9	6.3														3.09						23.67														1
FALSE	High	Master Protein	A0A087ZXW2	Ferritin OS=Apis mellifera OX=7460 PE=3 SV=1		0	FALSE	6.644	16	2	3	2	132	15.1	6.52												2.32							1.84													2
FALSE	High	Master Protein	A0A087ZU01	Ferrochelatase OS=Apis mellifera OX=7460 GN=ferrochelatase PE=3 SV=1		0	FALSE	101.452	50	16	202	16	397	45.5	8.48	50.76	52.64	53.1	18.62	19.74	7.31	51.81	33.16	12.4	26.46	35.24	28.82	33.84	14.72	7.26	1.9	21.07	21.56	10		11	10	8	6	5	5	8	7	5	5	8	7	8	6
FALSE	High	Master Protein	A0A0P0QK59	Ferrous iron transporter B OS=Serratia marcescens OX=615 GN=AR325_18370 PE=4 SV=1		0	FALSE	28.248	24	3	18	3	179	18.3	4.75									0											56.76									1
FALSE	High	Master Protein	A0A1L6QLH9	Ferroxidase OS=Serratia marcescens OX=615 GN=BVG97_20390 PE=3 SV=1		0	FALSE	13.808	27	3	3	3	159	18.5	4.94														5.13						2.9														2
FALSE	High	Master Protein	A0A088AFN0	Fe-S_biosyn domain-containing protein OS=Apis mellifera OX=7460 GN=LOC724467 PE=4 SV=1		0.006	FALSE	2.483	8	1	1	1	157	17.6	6.55											2.57																				1
FALSE	High	Master Protein	A0A088A280	FHA domain-containing protein OS=Apis mellifera OX=7460 GN=LOC413046 PE=4 SV=1		0.001	FALSE	3.828	3	2	26	2	795	91.4	4.97	0						0	0										0	0		1						1	1
FALSE	High	Master Protein	A0A087ZYL7	Fibrillar collagen NC1 domain-containing protein OS=Apis mellifera OX=7460 GN=LOC410038 PE=4 SV=1		0	FALSE	12.616	2	3	37	3	1501	148.2	8.62	7.46	2.33	7.39	4.63	7.07		7.61	7.04	11.39	3.82		2.42	4.43	9.69	6.65	2.35					2	1	2	1	2		2	2	3	1		1	1	3
FALSE	High	Master Protein	A0A088AKC6	Fibrillar collagen NC1 domain-containing protein OS=Apis mellifera OX=7460 PE=4 SV=1		0	FALSE	4.228	1	1	1	1	1755	178.4	5.33	0																				1
FALSE	High	Master Protein	A0A0P0Q8C6	Fimbria A protein OS=Serratia marcescens OX=615 GN=AR325_00820 PE=4 SV=1		0	FALSE	41.311	56	5	25	5	176	18.2	5.16				14.73						23.75					12.05					35.37				3						4
FALSE	High	Master Protein	A0A0P0QCG8	Fimbria A protein OS=Serratia marcescens OX=615 GN=AR325_10405 PE=4 SV=1		0	FALSE	4.599	7	1	1	1	173	17.6	6.04																				2.66
FALSE	High	Master Protein	A0A0G8B247	Fimbrial protein OS=Serratia marcescens OX=615 GN=BVG93_05670 PE=4 SV=1		0	FALSE	43.236	52	5	27	3	194	19.6	6.64									13.34						5.01					64.43									5
FALSE	High	Master Protein	A0A088AJJ1	Flavodoxin-like domain-containing protein OS=Apis mellifera OX=7460 PE=4 SV=1		0	FALSE	20.116	33	4	8	4	190	21.2	4.78	2.11	7.61															9.85	2.77			1	3
FALSE	High	Master Protein	A0A088ASE8	Flavokinase domain-containing protein OS=Apis mellifera OX=7460 GN=LOC552134 PE=4 SV=1		0	FALSE	24.252	44	5	21	5	147	16.9	8.05	9.91	2.7	2.24			8.38	6.94				4.89	7.53		5.07		1.99	6.49	4.75			3	1	1			3	2				2	2		2
FALSE	High	Master Protein	A0A088A5Z9	FMN hydroxy acid dehydrogenase domain-containing protein OS=Apis mellifera OX=7460 GN=LOC552771 PE=3 SV=1		0	FALSE	58.723	38	13	38	13	367	40.5	8.81	0		13.64	0				20.46	7.6					27.16		0		2.33	4.78		1		6	1				9	4					8
FALSE	High	Master Protein	A0A0U7WGK5	FMN-dependent NADH-azoreductase OS=Serratia marcescens OX=615 GN=azoR_1 PE=3 SV=1		0.008	FALSE	2.38	4	1	4	1	201	21.7	4.86					3.99				1.81						1.79										1				1
FALSE	High	Master Protein	A0A080V3M7	Formate acetyltransferase OS=Serratia marcescens OX=615 GN=pflB PE=4 SV=1		0	FALSE	63.614	21	12	31	6	760	85.2	5.94	2.22					1.8			11.49					4.69	9.94					52.57	1					1			3					1
FALSE	High	Master Protein	A0A0F6KNI3	Formyltetrahydrofolate deformylase OS=Serratia marcescens OX=615 GN=purU PE=3 SV=1		0	FALSE	4.244	5	1	1	1	282	32.2	6.96																				2.23
FALSE	High	Master Protein	A0A2G4QV57	Fructosamine kinase family protein OS=Serratia marcescens OX=615 GN=CS370_08070 PE=4 SV=1		0	FALSE	6.565	8	2	2	2	289	32.9	5.07																				3.96
FALSE	High	Master Protein	A0A1Q4P2F3	Fructose-1,6-bisphosphatase class 1 OS=Serratia marcescens OX=615 GN=fbp PE=3 SV=1		0	FALSE	10.647	5	1	2	1	334	36.7	6.01																				5.56
FALSE	High	Master Protein	V5T897	Fructose-1,6-bisphosphate aldolase OS=Lactobacillus kimbladii OX=1218506 GN=fba PE=4 SV=1		0.001	FALSE	3.802	3	1	2	1	304	32.9	5.12			2.24												1.83								1
FALSE	High	Master Protein	A0A1C3HHJ9	Fructose-bisphosphate aldolase class 1 OS=Serratia marcescens OX=615 GN=fbaB PE=4 SV=1		0	FALSE	80.263	53	13	34	13	349	38.2	7.24														5.07	1.94					90.83														3
FALSE	High	Master Protein	A0A087ZPQ8	Fructose-bisphosphate aldolase OS=Apis mellifera OX=7460 PE=3 SV=1		0	FALSE	341.645	78	25	732	25	387	41.7	8.12	191.86	80.66	79.17	62.39	50.37	131.39	76.12	62.78	70.8	85.33	241	312.42	82.91	107.11	25.6	142.92	222.38	68.41	187.48	1.61	20	11	10	11	9	16	12	12	12	12	20	23	13	16
FALSE	High	Master Protein	A0A093UQU9	Fructose-bisphosphate aldolase OS=Pectobacterium carotovorum subsp. carotovorum OX=555 GN=KP17_18225 PE=3 SV=1		0	FALSE	38.379	13	4	42	1	358	39	6	4.42				3.98	3.44			9.5		3.41			15.22	10.35					69.06	1				1	1			2		1			3
FALSE	High	Master Protein	A0A088ADU2	Fucosidase_C domain-containing protein OS=Apis mellifera OX=7460 GN=Fuca PE=3 SV=1		0	FALSE	11.873	8	4	22	4	471	55.7	6.47	2.17	4.43	2.11			4.07	2.15	0			4.58	6.54				6.73	4.17	3.67	2.18		1	1	1			2	1	1			1	2
FALSE	High	Master Protein	A0A0P0QEG0	Fumarate hydratase class II OS=Serratia marcescens OX=615 GN=fumC PE=3 SV=1		0	FALSE	31.569	20	5	13	2	465	50	6.52	4.06								3.51		2.19	4.4		4.21		2.88	4.04			16.8	1								1		1	1		2
FALSE	High	Master Protein	A0A1Q4NUT5	Fumarate hydratase class II OS=Serratia marcescens OX=615 GN=fumC PE=3 SV=1		0	FALSE	17.673	14	4	4	2	465	50	6.61														4.05						8.14														2
FALSE	High	Master Protein	A0A087ZN22	Fumarylacetoacetase OS=Apis mellifera OX=7460 PE=3 SV=1		0	FALSE	23.859	20	4	4	4	374	41.6	6.19												14.21																				4
FALSE	High	Master Protein	A0A088A1V8	FYVE-type domain-containing protein OS=Apis mellifera OX=7460 GN=Sara PE=4 SV=1		0	FALSE	5.398	1	1	2	1	1435	161.2	5.06		2.55										2.41										1										1
FALSE	High	Master Protein	A0A088A8E6	G protein gamma domain-containing protein OS=Apis mellifera OX=7460 PE=4 SV=1		0.002	FALSE	3.379	0	1	18	1	2056	238.8	8.15	1.81	5.22	3.42	1.92	3.23	1.49	3.52	0		1.79		0				0					1	1	1	1	1	1	1	1		1		1
FALSE	High	Master Protein	A0A088A7S9	Gal_mutarotas_2 domain-containing protein OS=Apis mellifera OX=7460 GN=LOC551205 PE=3 SV=1		0	FALSE	20.955	9	6	14	6	925	106.8	6.27	0	0	2.48			0		2.1			5.26	4.56	2.41					1.82			1	1	2			1		1			3	3	1
FALSE	High	Master Protein	A0A087ZZX4	Galectin OS=Apis mellifera OX=7460 GN=galectin1 PE=4 SV=1		0	FALSE	26.662	13	5	26	5	482	49.8	5.2	8.97	5.16				3.53	5.66	0			17.7	20.09	5.21	9.03			2.18	1.9	2.54		1	1				2	2	1			4	3	2	1
FALSE	High	Master Protein	A0A087ZZN6	GB1/RHD3-type G domain-containing protein OS=Apis mellifera OX=7460 GN=atl PE=4 SV=1		0	FALSE	97.141	29	13	89	13	633	72.3	8.6	6.6	24.22	6.85	0	1.77	3.94	17.41	9.72	0	16.9	17.76	18.04	19.19	0		2.95	9.55	3.71	12.04		4	5	5	1	1	1	4	3	1	5	4	7	4	1
FALSE	High	Master Protein	K0FDG6	GB12811-like protein (Fragment) OS=Apis mellifera OX=7460 PE=2 SV=1		0	FALSE	15.066	36	2	452	2	149	14.7	4.88	13.67	24.69	38.33	20.37	59.82	4.94	10.56	11.45	12.7	227.64	7.53	16.23	15.09	83.12	10.48	21.68	104.76	178.54	12.77	57.42	1	1	1	1	1	1	1	1	1	1	1	1	1	2
FALSE	High	Master Protein	A0A084X227	General stress protein 17o OS=Serratia marcescens OX=615 GN=ohrB PE=4 SV=1		0	FALSE	9.304	23	3	4	3	141	14.6	6.55																				9.85
FALSE	High	Master Protein	H9K9P8	GFO_IDH_MocA domain-containing protein OS=Apis mellifera OX=7460 GN=LOC412231 PE=4 SV=1		0	FALSE	80.161	50	11	60	11	331	36.9	6.52	9.98		0	0		8.85			0		29.51	25.09	0	36.21		2.3	2.84		20.79		2		1	1		3			1		7	6	1	10
FALSE	High	Master Protein	A0A088AA33	GGACT domain-containing protein OS=Apis mellifera OX=7460 PE=4 SV=1		0	FALSE	64.488	78	10	80	10	172	20.1	6.39	33.41	10.85	9.72	0	0	6.27	1.81	8.31	0	0	21.27	19.94	0	0		4.82	6.08	2.71	6.63		8	4	4	1	1	4	3	3	1	2	9	7	1	1
FALSE	High	Master Protein	A0A088A2A8	Gln-synt_C domain-containing protein OS=Apis mellifera OX=7460 GN=GlnS PE=3 SV=1		0	FALSE	119.532	54	15	215	15	405	45.3	8.09	55.93	39.51	37.39	1.73	19.97	30.9	26.15	27.75		24.43	68.02	59.46	35.54	16.34	1.96	47.52	24.77	43.98	26.5		9	5	9	1	6	7	4	8		8	9	10	7	5
FALSE	High	Master Protein	Q14SN0	Globin 1 OS=Apis mellifera OX=7460 GN=glob1 PE=2 SV=1		0	FALSE	162.65	86	15	249	15	171	19.5	8.59	32.12	68.45	21.52	21.49	30.63	52.53	55.64	10.7	27.54	12.69	62.56	57.11	46.41	45.44	24.26	45.4	49.18	54.48	45.51		5	11	4	3	6	8	9	3	6	2	9	9	9	8
FALSE	High	Master Protein	A0A0G8B1R1	Glucans biosynthesis protein G OS=Serratia marcescens OX=615 GN=mdoG PE=3 SV=1		0	FALSE	5.793	3	1	1	1	500	56.4	7.65																				3.91
FALSE	High	Master Protein	A0A1Y0LYY9	Glucosamine-6-phosphate deaminase OS=Enterococcus faecalis OX=1351 GN=nagB PE=3 SV=1		0	FALSE	7.988	26	2	2	2	233	25.3	4.89																				6.54
FALSE	High	Master Protein	A0A0U5WKE6	Glucosamine-6-phosphate deaminase OS=Serratia marcescens OX=615 GN=nagB PE=3 SV=1		0.004	FALSE	2.926	4	1	2	1	266	29.6	7.11															0					0
FALSE	High	Master Protein	A0A087ZPX4	Glucosamine-6-phosphate isomerase OS=Apis mellifera OX=7460 GN=Oscillin PE=3 SV=1		0	FALSE	6.312	4	1	3	1	279	31.7	6.46											2.72	3.32					2.92														1	1
FALSE	High	Master Protein	A0A0B4J2M6	Glucose-6-phosphate 1-dehydrogenase OS=Apis mellifera OX=7460 GN=LOC725325 PE=3 SV=1		0	FALSE	29.746	14	6	12	6	518	60.2	6.81		2.64				0				1.72	0	3.95	0					1.64	2.22	2.29		2				2				1	1	2	1
FALSE	High	Master Protein	A0A0G8BG45	Glucose-6-phosphate 1-dehydrogenase OS=Serratia marcescens OX=615 GN=zwf PE=3 SV=1		0	FALSE	21.01	12	5	10	5	491	55.8	6.49														2.37	0					16.59														1
FALSE	High	Master Protein	A0A087ZS11	Glucose-6-phosphate 1-epimerase OS=Apis mellifera OX=7460 GN=LOC727456 PE=3 SV=1		0	FALSE	9.908	15	2	2	2	278	31.9	7.5			2.71							0													1							1
FALSE	High	Master Protein	A0A087ZPV4	Glucose-6-phosphate isomerase OS=Apis mellifera OX=7460 GN=LOC551154 PE=3 SV=1		0	FALSE	121.694	51	20	71	20	557	62.9	7.91	2.33	5.12	2.35			4.82			2.31	5.19	31.78	95.13	2.75	7.09		2.03	12.66	4.51	5.25	4.21	1	2	1			2			2	2	9	18	1	3
FALSE	High	Master Protein	A0A1Q4P0Z8	Glucose-6-phosphate isomerase OS=Serratia marcescens OX=615 GN=pgi PE=3 SV=1		0	FALSE	29.417	13	5	15	1	548	61.2	6.54	1.94				0									5.77	0			2.02		17.04	1				1									3
FALSE	High	Master Protein	A0A2G4QIW2	Glucose-6-phosphate isomerase OS=Serratia marcescens OX=615 GN=pgi PE=3 SV=1		0	FALSE	28.756	13	5	16	1	548	61.2	6.33	1.94				0									5.77	0			2.02		22.02	1				1									3
FALSE	High	Master Protein	A0A086FHN3	Glucose-specific phosphotransferase enzyme IIA component OS=Serratia marcescens OX=615 GN=crr PE=4 SV=1		0	FALSE	41.085	51	6	18	1	169	18.3	4.98									2.23					5.84	0					40.01									1					2
FALSE	High	Master Protein	A0A088APM4	Glucosylceramidase OS=Apis mellifera OX=7460 GN=LOC409708 PE=3 SV=1		0	FALSE	12.775	7	4	8	4	522	59.3	5.57			2.1			0				4.64		0	1.7				2.33			2.39			1			1				2		1	1
FALSE	High	Master Protein	A0A088AH78	GLUE N-terminal domain-containing protein OS=Apis mellifera OX=7460 GN=Vps36 PE=4 SV=1		0	FALSE	5.759	4	1	1	1	402	45.9	5.97												2.14																				1
FALSE	High	Master Protein	A0A093S653	Glutamate dehydrogenase OS=Pectobacterium carotovorum subsp. carotovorum OX=555 GN=KP17_18415 PE=3 SV=1		0	FALSE	28.835	17	5	10	2	447	48.1	6.55					2.48									6.93	0					16.92					1									3
FALSE	High	Master Protein	A0A0P0QEX1	Glutamate dehydrogenase OS=Serratia marcescens OX=615 GN=AR325_15185 PE=3 SV=1		0	FALSE	29.579	25	8	10	8	424	46.3	6.32																				26.21
FALSE	High	Master Protein	A0A1C3HKD9	Glutamate dehydrogenase OS=Serratia marcescens OX=615 GN=gdhA_2 PE=3 SV=1		0	FALSE	30.937	22	7	14	4	447	48.6	6.76					2.48									5.19	1.61					26.79					1									2
FALSE	High	Master Protein	A0A2G4PPS3	Glutamate synthase small subunit OS=Serratia marcescens OX=615 GN=CS366_03495 PE=4 SV=1		0.002	FALSE	3.452	3	1	1	1	472	51.7	5.41																				2.4
FALSE	High	Master Protein	A0A0G3SJK2	Glutamate/aspartate ABC transporter substrate-binding protein OS=Serratia marcescens OX=615 GN=gltI PE=4 SV=1		0	FALSE	66.945	36	8	20	8	298	33.2	8.72									5.94					3.54	2.28					48.06									2					1
FALSE	High	Master Protein	A0A0G3SQS9	Glutamate-1-semialdehyde 2,1-aminomutase OS=Serratia marcescens OX=615 GN=hemL PE=3 SV=1		0	FALSE	5.69	6	2	2	2	429	45.9	5.25															2.28					2.06
FALSE	High	Master Protein	A0A0M3UJ30	Glutamate--tRNA ligase OS=Serratia marcescens OX=615 GN=gltX PE=3 SV=1		0	FALSE	8.32	3	1	2	1	471	53.5	5.71																				5.93
FALSE	High	Master Protein	A0A086FMU0	Glutamine ABC transporter ATP-binding protein OS=Serratia marcescens OX=615 GN=glnQ PE=4 SV=1		0	FALSE	4.024	6	1	1	1	240	26.6	6.87																				2.5
FALSE	High	Master Protein	A0A088A349	Glutamine amidotransferase type-1 domain-containing protein OS=Apis mellifera OX=7460 PE=3 SV=1		0.001	FALSE	3.774	1	1	1	1	1323	147.7	6.4																			2.09
FALSE	High	Master Protein	A0A088A6Y8	Glutamine amidotransferase type-2 domain-containing protein OS=Apis mellifera OX=7460 PE=4 SV=1		0	FALSE	111.563	15	20	51	20	1909	211.9	7.34	22.5	0	2.26				0			2.11	35.53	21.35	2.07	0		1.88	5.56	4.6	15.89		7	1	1				1			1	14	8	1	1
FALSE	High	Master Protein	A0A0M4S0F9	Glutamine synthetase OS=Serratia marcescens OX=615 GN=glnA PE=3 SV=1		0	FALSE	25.328	16	5	14	5	469	51.8	5.4					7.85				8.79						10.03					13.48					3				2
FALSE	High	Master Protein	A0A093SBI3	Glutamine--fructose-6-phosphate aminotransferase [isomerizing] OS=Pectobacterium carotovorum subsp. carotovorum OX=555 GN=glmS PE=3 SV=1		0	FALSE	4.771	2	1	2	1	610	67	5.85																				6.12
FALSE	High	Master Protein	A0A221HFI1	Glutamine--fructose-6-phosphate aminotransferase [isomerizing] OS=Serratia marcescens OX=615 GN=glmS PE=3 SV=1		0	FALSE	4.867	2	1	3	1	609	66.6	5.69														5.27						2.37														1
FALSE	High	Master Protein	A0A0U5WSI4	Glutamine--tRNA ligase OS=Serratia marcescens OX=615 GN=glnS PE=3 SV=1		0.002	FALSE	3.115	2	1	2	1	554	63.3	5.9																				4.2
FALSE	High	Master Protein	A0A088AC76	Glutamyl-tRNA(Gln) amidotransferase subunit A, mitochondrial OS=Apis mellifera OX=7460 GN=gatA PE=3 SV=1		0	FALSE	13.31	7	2	4	2	518	57.8	7.21							2.92				4.46	3.1															1				2	1
FALSE	High	Master Protein	A0A0P0QFZ7	Glutaredoxin 2 OS=Serratia marcescens OX=615 GN=AR325_16895 PE=4 SV=1		0.001	FALSE	3.89	5	1	1	1	215	24.1	5.2																				3.11
FALSE	High	Master Protein	A0A087ZS80	Glutaredoxin domain-containing protein OS=Apis mellifera OX=7460 GN=Grx1 PE=4 SV=1		0	FALSE	20.934	37	3	11	3	98	10.9	6.52	1.71					3.21					3.03	3.57				0	1.84		7.32		1					1					1	1
FALSE	High	Master Protein	A0A088A6K7	Glutaredoxin domain-containing protein OS=Apis mellifera OX=7460 GN=LOC551916 PE=4 SV=1		0	FALSE	24.067	28	4	7	4	192	21.9	4.37												2.16					2.02	9.16	0													1
FALSE	High	Master Protein	A0A088A226	Glutaredoxin OS=Apis mellifera OX=7460 GN=Grx2 PE=3 SV=1		0	FALSE	58.022	32	5	36	5	133	15	7.99	16.36	3.42	3.35			3.55	7.78	9.78			3.02	4.49	2.19	0		6.84	21.89	18.16	5.41		3	1	1			1	2	2			2	2	1	1
FALSE	High	Master Protein	A0A0F6KRM0	Glutaredoxin OS=Serratia marcescens OX=615 GN=grxD PE=3 SV=1		0	FALSE	6.445	11	1	6	1	115	13	4.84														4.73	2.25					6.28														1
FALSE	High	Master Protein	A0A2G4QMR6	Glutathione ABC transporter substrate-binding protein GsiB OS=Serratia marcescens OX=615 GN=CS370_18005 PE=4 SV=1		0	FALSE	9.874	5	2	2	2	511	56.2	8.76																				6
FALSE	High	Master Protein	Q7YXM2	Glutathione peroxidase OS=Apis mellifera ligustica OX=7469 GN=Gtpx-1 PE=2 SV=1		0	FALSE	81.403	73	12	168	12	168	19.1	7.78	45.47	25.27	12.53	9.36	4.03	24.7	0	2.49	7.67	7.77	47.6	44.75	16.55	20.57	5.39	26.43	7.99	10.72	20.22	2.13	10	8	6	4	3	9	1	2	4	4	9	9	4	8
FALSE	High	Master Protein	A0A088AB47	Glutathione peroxidase OS=Apis mellifera OX=7460 GN=Gtpx2 PE=3 SV=1		0	FALSE	27.45	36	5	21	5	201	23.1	5.91	7.75			0	1.62	2.15					2.36	1.81	2.19	4.46			3.14	7.29	3.64		3			1	2	1					1	1	2	2
FALSE	High	Master Protein	A0A086FK22	Glutathione reductase OS=Serratia marcescens OX=615 GN=gor PE=3 SV=1		0	FALSE	10.863	10	2	2	2	450	48.5	6.38																				7.12
FALSE	High	Master Protein	A0A0P0QE58	Glutathione S-transferase OS=Serratia marcescens OX=615 GN=AR325_14130 PE=3 SV=1		0	FALSE	5.303	7	1	2	1	201	22.3	8.13																				5.88
FALSE	High	Master Protein	C3VMN1	Glutathione S-transferase S1 OS=Apis mellifera OX=7460 GN=GstS1 PE=2 SV=1		0	FALSE	58.479	51	10	115	10	204	23.7	8.81	16.67	14.92	14.88	6.86	9.61	28.24	3.35	5.82	7.81	7.17	23.47	12.57	12.91	29.04	10.36	8.83	11.28	25.37	0		4	3	4	4	4	8	1	2	3	2	5	3	3	5
FALSE	High	Master Protein	A0A2G4PMQ4	Glutathione synthetase OS=Serratia marcescens OX=615 GN=gshB PE=3 SV=1		0	FALSE	8.215	10	2	2	2	316	35.3	6.07																				6.37
FALSE	High	Master Protein	A0A1C3HJD8	Glutathionyl-hydroquinone reductase YqjG OS=Serratia marcescens OX=615 GN=yqjG PE=4 SV=1		0	FALSE	5.526	4	1	1	1	328	37.4	6.52																				3.05
FALSE	High	Master Protein	V5T6H1	Glyceraldehyde 3-phosphate dehydrogenase OS=Lactobacillus helsingborgensis OX=1218494 GN=gap PE=3 SV=1		0	FALSE	135.258	72	17	139	16	338	36.3	6.05	10.99	0	134.24	0	24.58			31.43	38.72	9.63	14.85			2.71	45.97			17.25		103.7	3	1	15	1	6			5	7	2	3			1
FALSE	High	Master Protein	A0A1X9PQQ0	Glyceraldehyde-3-phosphate dehydrogenase (Fragment) OS=Pectobacterium carotovorum subsp. carotovorum OX=555 GN=gapA PE=3 SV=1		0	FALSE	33.828	33	8	104	6	270	28.6	6.09	15.91	2.22	8.25	7.66	16.43	13.8	4.52	4.41	14.9	4.51	12.98	8.65	2.16	21.7	12.74	2.24	7.9	3.9	5.95	81.85	4	1	2	4	5	4	1	1	3	1	2	1	1	7
FALSE	High	Master Protein	R0MC05	Glyceraldehyde-3-phosphate dehydrogenase 2 OS=Nosema bombycis (strain CQ1 / CVCC 102059) OX=578461 GN=G3P2 PE=4 SV=1		0	FALSE	6.489	7	1	7	1	203	22.6	8.38																0	2.11		10.12
FALSE	High	Master Protein	A0A088AHC8	Glyceraldehyde-3-phosphate dehydrogenase OS=Apis mellifera OX=7460 GN=Gapdh PE=2 SV=1		0	FALSE	187.716	64	15	598	13	333	35.9	8.02	79.9	107.1	101.19	29.04	74.61	89.91	71.08	60.64	48.45	115.54	169.11	217.74	114.33	74.2	7.98	40.71	266.27	52.62	149.68		10	14	12	8	12	10	9	10	8	12	15	14	12	10
FALSE	High	Master Protein	V5T859	Glyceraldehyde-3-phosphate dehydrogenase OS=Bifidobacterium sp. Bin2N OX=1293822 PE=3 SV=1		0	FALSE	17.857	19	5	11	4	351	37.6	5.58	0	0	14.83		1.93					2.07	1.95										1	1	5		1					1	1
FALSE	High	Master Protein	A0A1B4XPT7	Glyceraldehyde-3-phosphate dehydrogenase OS=Enterococcus faecalis OX=1351 GN=gap PE=3 SV=1		0	FALSE	4.602	5	1	1	1	333	35.7	5.16														3.47																				1
FALSE	High	Master Protein	V5T887	Glyceraldehyde-3-phosphate dehydrogenase OS=Lactobacillus apinorum OX=1218495 GN=gap-3 PE=3 SV=1		0	FALSE	7.424	6	2	19	1	337	36.4	5.25	2.7	0	9.39		4.29			2.74	5.2	2.07	1.95				2.5			7.09		2.94	2	1	2		2			1	1	1	1
FALSE	High	Master Protein	V5T8V9	Glyceraldehyde-3-phosphate dehydrogenase OS=Lactobacillus mellis OX=1218508 GN=gap PE=3 SV=1		0	FALSE	12.548	13	3	5	3	339	36.1	5.87								13.6																				3
FALSE	High	Master Protein	A0A0P0QFJ0	Glyceraldehyde-3-phosphate dehydrogenase OS=Serratia marcescens OX=615 GN=AR325_16545 PE=3 SV=1		0	FALSE	71.898	59	13	146	11	331	35.5	6.81	13.78	2.22	7.32	6.18	33.31	16.71	4.52	4.41	20.96	8.32	16.22	13.63	4.72	20.93	39.48	2.24	24.39	14.71	12.9	95.88	3	1	2	4	6	4	1	1	6	3	4	2	2	6
FALSE	High	Master Protein	A0A093SEB4	Glycerol kinase OS=Pectobacterium carotovorum subsp. carotovorum OX=555 GN=glpK PE=3 SV=1		0	FALSE	10.963	9	3	10	1	503	55.7	5.95	0				1.97				2.26					4.06	2.11					0	1				2				1					2
FALSE	High	Master Protein	A0A1Q5WGW9	Glycerol kinase OS=Serratia marcescens OX=615 GN=glpK PE=3 SV=1		0	FALSE	13.504	11	4	11	2	502	55.7	6.14	0				1.97				2.26					4.06	2.11					5.13	1				2				1					2
FALSE	High	Master Protein	O61368	Glycerol-3-phosphate dehydrogenase [NAD(+)] OS=Apis mellifera OX=7460 GN=Gpdh PE=3 SV=1		0	FALSE	208.194	80	23	373	23	363	40.1	7.06	42.03	138.7	71.06	8.92	54.47	52.6	24.58	33.03	8.06	41.03	83.14	128.15	73.17	38.92	5.29	42.57	56.18	33.35	51.46		9	21	15	3	14	13	7	9	3	9	13	17	15	11
FALSE	High	Master Protein	A0A087ZRH2	Glycerol-3-phosphate dehydrogenase [NAD(+)] OS=Apis mellifera OX=7460 PE=3 SV=1		0	FALSE	44.182	36	8	15	8	285	31.2	5.57	4.18	3.32									2.11	20.14				2.22	3.86		1.63		1	1									1	5
FALSE	High	Master Protein	A0A087ZSL0	Glycerol-3-phosphate dehydrogenase OS=Apis mellifera OX=7460 PE=3 SV=1		0	FALSE	288.81	56	35	704	35	753	84.2	6.81	149.47	136.65	132.51	89.31	120.06	111.74	147.76	129.88	107.85	172.04	95.67	83.06	107.73	68.62	56.47	36.69	59.08	69.46	31.43	3.65	24	23	22	19	21	20	23	26	21	31	18	19	20	15
FALSE	High	Master Protein	A0A1Q5VY71	Glycerol-3-phosphate dehydrogenase OS=Serratia marcescens OX=615 GN=A8A12_18730 PE=3 SV=1		0	FALSE	4.077	4	2	2	2	502	56.4	7.25														1.97						2.55														1
FALSE	High	Master Protein	A0A0P0QI77	Glycine betaine ABC transporter substrate-binding protein OS=Serratia marcescens OX=615 GN=AR325_22210 PE=4 SV=1		0	FALSE	14.379	14	3	3	3	334	36.3	6.73																				10.72
FALSE	High	Master Protein	A0A1Q4NXN7	Glycine dehydrogenase (decarboxylating) OS=Serratia marcescens OX=615 GN=gcvP PE=3 SV=1		0	FALSE	14.064	5	5	6	5	959	104.5	6.18																				14.04
FALSE	High	Master Protein	A0A086FGK8	Glycine zipper 2TM domain-containing protein OS=Serratia marcescens OX=615 GN=slyB PE=4 SV=1		0	FALSE	31.107	29	3	10	3	154	15.4	9.44															5.43					23.63
FALSE	High	Master Protein	A0A0P0QEB1	Glycine/betaine ABC transporter ATP-binding protein OS=Serratia marcescens OX=615 GN=AR325_14410 PE=4 SV=1		0	FALSE	4.002	3	1	1	1	379	42.4	6.23																				2.42
FALSE	High	Master Protein	A0A0U7Y9I8	Glycine--tRNA ligase alpha subunit OS=Serratia marcescens OX=615 GN=glyQ PE=3 SV=1		0	FALSE	4.848	4	1	1	1	305	34.8	5.11																				2.64
FALSE	High	Master Protein	A0A093V7X3	Glycine--tRNA ligase beta subunit OS=Pectobacterium carotovorum subsp. carotovorum OX=555 GN=glyS PE=3 SV=1		0.001	FALSE	3.81	2	1	2	1	689	76.1	5.63														2.47	0																			1
FALSE	High	Master Protein	A0A221HFQ0	Glycine--tRNA ligase beta subunit OS=Serratia marcescens OX=615 GN=glyS PE=3 SV=1		0	FALSE	5.076	2	1	1	1	689	75.8	5.71																				2.98
FALSE	High	Master Protein	A0A087ZUC1	Glyco_18 domain-containing protein OS=Apis mellifera OX=7460 GN=100577156 PE=4 SV=1		0	FALSE	173.603	55	17	349	17	390	43.8	6.27	61.3		53.95	6.38	52.59	99.47		26.96	101.62	8.04	129.47		78.33	84.34	50.75	13.41		11.3	13.03	43.71	12		11	2	13	13		7	14	3	15		11	14
FALSE	High	Master Protein	A0A088AMK2	Glyco_18 domain-containing protein OS=Apis mellifera OX=7460 PE=4 SV=1		0	FALSE	132.2	50	14	404	14	449	50.1	8.44	116.64	114.46	43.18	30.75	15.19	66.05	57.23	29.02	25.47	8.35	58.89	87.32	49.86	24.36	8.49	49.04	85.82	32.73	29.11		13	14	11	9	5	11	11	7	8	3	12	14	11	7
FALSE	High	Master Protein	A0A088A3B7	Glyco_transf_20 domain-containing protein OS=Apis mellifera OX=7460 PE=4 SV=1		0	FALSE	117.14	33	20	148	20	771	87.2	6.62	7.3	20.71	48.18	0	0	2.97	5.19	63.54	34.71	4.14	41.77	7.69	14.51	75.11	6.59	2.95	13.5	16.67	27.35		3	7	13	1	1	2	3	16	10	1	12	2	5	15
FALSE	High	Master Protein	A0A2G4QNN1	Glyoxylate carboligase OS=Serratia marcescens OX=615 GN=gcl PE=3 SV=1		0	FALSE	18.827	8	3	4	3	593	64.7	6.37																				12.57
FALSE	High	Master Protein	A0A088AJV1	GMC_OxRdtase_N domain-containing protein OS=Apis mellifera OX=7460 GN=LOC410744 PE=3 SV=1		0.001	FALSE	3.821	2	1	1	1	625	69.2	9.36				2.12																				1
FALSE	High	Master Protein	A0A087ZUE7	GMC_OxRdtase_N domain-containing protein OS=Apis mellifera OX=7460 PE=4 SV=1		0	FALSE	38.552	13	7	20	7	623	68.6	6.14				27.31						27.62														7						6
FALSE	High	Master Protein	A0A087ZVX2	GMC_OxRdtase_N domain-containing protein OS=Apis mellifera OX=7460 PE=4 SV=1		0	FALSE	11.812	6	2	2	2	650	73	6.25													5.32																				2
FALSE	High	Master Protein	A0A087ZPR9	GMP reductase OS=Apis mellifera OX=7460 GN=LOC552316 PE=3 SV=1		0	FALSE	9.757	8	2	10	2	349	37.9	7.39						2.39		1.73	1.68	2.48	1.99	3.85	2.72							2.06						1		1	1	1	1	1	1
FALSE	High	Master Protein	A0A087ZP87	GOLD domain-containing protein OS=Apis mellifera OX=7460 GN=102655603 PE=3 SV=1		0.002	FALSE	3.562	6	1	1	1	202	23.3	6.52															3.05
FALSE	High	Master Protein	A0A088AGB1	GOLD domain-containing protein OS=Apis mellifera OX=7460 GN=LOC412554 PE=3 SV=1		0	FALSE	24.889	19	3	13	3	215	25.3	7.01	5.8	3.4	2.52			3.06	3.39			4.24	5.05		3.32		3.15	0	3.7	3.47	0		1	1	1			1	1			1	1		1
FALSE	High	Master Protein	A0A088ANQ5	GOLD domain-containing protein OS=Apis mellifera OX=7460 GN=LOC552602 PE=3 SV=1		0	FALSE	21.238	30	5	36	5	205	23.4	5.62	7.54	13.51	6.24	7.1	4.67	4.99	1.99	1.96		2.76	5.38	2.73	2.77		2.4	2.24	5.09	7.68	9.96		3	5	3	3	2	2	1	1		1	2	1	1
FALSE	High	Master Protein	A0A087ZNT8	GOLD domain-containing protein OS=Apis mellifera OX=7460 PE=3 SV=1		0	FALSE	35.484	16	4	56	4	202	23.4	7.33	11.47	8.18	15.79	6.62	7.66	11.56	14.98	11.01	3.37	12.15	11.5	12.84	14		3.58	7.36	5.31	3.21	6.39		2	2	2	1	1	2	2	1	1	1	2	2	2
FALSE	High	Master Protein	A0A087ZRV7	Gp_dh_N domain-containing protein OS=Apis mellifera OX=7460 PE=3 SV=1		0	FALSE	4.056	4	1	2	1	323	34.5	5.27			2.28											2.68									1											1
FALSE	High	Master Protein	A0A088AL45	GPI-anchor transamidase OS=Apis mellifera OX=7460 PE=3 SV=1		0	FALSE	4.401	6	1	1	1	336	38.7	7.52		2.7																				1
FALSE	High	Master Protein	A0A088AHI6	GP-PDE domain-containing protein OS=Apis mellifera OX=7460 PE=4 SV=1		0	FALSE	25.272	20	4	11	4	273	32.2	8.35	2.5	3.9	3.3			2.89	3.4			3.29	3.8		4.17					2.86	4.9		1	1	1			1	1			1	1		1
FALSE	High	Master Protein	A0A088AP70	GRAM domain-containing protein OS=Apis mellifera OX=7460 GN=LOC410012 PE=4 SV=1		0	FALSE	5.153	4	1	1	1	295	32.6	7.08																			2.89
FALSE	High	Master Protein	A0A088AGJ6	GrpE protein homolog OS=Apis mellifera OX=7460 PE=3 SV=1		0	FALSE	37.775	25	5	42	5	232	26.4	8.1	6.64	2.94	2.95		2.02	11.01			0		10.84	17.6	2.72	7.38		4.7	12.72	7.54	5.07		3	1	1		1	3			1		3	5	1	2
FALSE	High	Master Protein	A0A088A654	GST C-terminal domain-containing protein OS=Apis mellifera OX=7460 GN=100577000 PE=4 SV=1		0	FALSE	7.899	15	2	3	2	171	20.1	5.21		3.01				2.93											0					1				1
FALSE	High	Master Protein	A0A088ADT5	GST N-terminal domain-containing protein OS=Apis mellifera OX=7460 GN=GstU1 PE=4 SV=1		0	FALSE	13.801	21	1	12	1	67	7.7	4.83	4.26	3.89				2.48	4.41				10.88	3.49	3.82			3.79	6.99				1	1				1	1				1	1	1
FALSE	High	Master Protein	A0A088AI98	GST N-terminal domain-containing protein OS=Apis mellifera OX=7460 PE=3 SV=1		0	FALSE	11.297	15	3	8	3	218	25.2	6.86	0					0					2.11	3.29	2.81								1					1					2	2	1
FALSE	High	Master Protein	A0A093SBL2	GTP cyclohydrolase 1 OS=Pectobacterium carotovorum subsp. carotovorum OX=555 GN=folE PE=3 SV=1		0	FALSE	9.719	15	2	2	2	220	24.6	8.05																				6.47
FALSE	High	Master Protein	A0A0B4J2L9	GTP:AMP phosphotransferase, mitochondrial OS=Apis mellifera OX=7460 GN=Adk3 PE=3 SV=1		0	FALSE	10.641	22	4	7	4	224	25.1	9.48	0					0					2.32			0		0	2.44				1					1					2			1
FALSE	High	Master Protein	A0A087ZWI7	GTP-binding nuclear protein OS=Apis mellifera OX=7460 GN=ran PE=3 SV=1		0	FALSE	66.245	61	9	123	9	215	24.6	7.42	42.3	24.55	20.75	21.48	14.38	14.22	24.54	18.6	15.28	13.99	10.16	12.35	11.44	18.19	5.34	13.58	8.06	5.85	9.47	3.66	8	6	5	5	4	5	5	4	3	3	3	3	3	4
FALSE	High	Master Protein	A0A0P0QEC8	GTP-binding protein OS=Serratia marcescens OX=615 GN=AR325_14320 PE=4 SV=1		0	FALSE	4.01	3	1	1	1	510	55.2	5.16																				3.18
FALSE	High	Master Protein	A0A1Q4NWL3	GTP-binding protein TypA OS=Serratia marcescens OX=615 GN=BHU62_18130 PE=4 SV=1		0	FALSE	16.407	8	4	4	4	607	67.1	5.41															2.42					7.64
FALSE	High	Master Protein	A0A088A648	Guanylate kinase-like domain-containing protein OS=Apis mellifera OX=7460 GN=LOC552023 PE=4 SV=1		0	FALSE	6.144	7	1	1	1	208	23.8	8.12																			1.85
FALSE	High	Master Protein	A0A087ZRE7	H/ACA ribonucleoprotein complex subunit OS=Apis mellifera OX=7460 GN=LOC413686 PE=3 SV=1		0	FALSE	15.946	18	3	13	3	201	21	11.02	1.68					1.67	4.41		2.05		1.74	2.76	1.87			2		5.42	2.5		1					1	2		1		2	1	1
FALSE	High	Master Protein	A0A088A802	H15 domain-containing protein OS=Apis mellifera OX=7460 PE=3 SV=1		0	FALSE	44.115	22	7	43	7	295	32.9	10.33	10.22	8.16	6.62	4.74		2.09	12.94				1.66	6.84	0	4.02		2	5.06	10.59	13.79		4	4	3	2		1	6				1	3	1	2
FALSE	High	Master Protein	A0A088A4Q4	HABP4_PAI-RBP1 domain-containing protein OS=Apis mellifera OX=7460 GN=LOC409410 PE=4 SV=1		0	FALSE	25.472	11	4	17	4	414	46.9	8.87		5.72				3.25	5.43				5.5	3.84					10.4	5.1	2.9			2				2	2				2	1
FALSE	High	Master Protein	H9KUJ6	HATPase_c domain-containing protein OS=Apis mellifera OX=7460 GN=LOC412150 PE=3 SV=1		0	FALSE	249.737	49	35	391	33	798	92.1	5.07	100.32	71.6	55.69	10.33	20.68	55.53	86.29	37.2	4.69	17.11	109.7	104.14	51.91	33.5	15.71	36.18	88.59	68.16	47.4	5.81	25	19	16	6	9	20	21	12	2	4	26	22	17	12
FALSE	High	Master Protein	A0A087ZQD3	HATPase_c domain-containing protein OS=Apis mellifera OX=7460 PE=3 SV=1		0	FALSE	399.594	61	41	556	28	724	83.4	5.05	109.78	71.54	54.82	13.26	28.87	51.04	63.87	49.97	25.36	80.05	146.03	183.57	88.6	56.87	31.08	59.91	161.85	51.36	94.14	18.14	23	16	16	8	8	15	17	14	9	18	21	32	21	16
FALSE	High	Master Protein	A0A088A2L4	HATPase_c domain-containing protein OS=Apis mellifera OX=7460 PE=3 SV=1		0	FALSE	197.161	46	29	259	18	755	87.1	5.2	66.64	25.04	21.96	6.18	8.81	23.69	20.29	18.82	11.28	21.37	78.66	68.92	35.79	33.05	15.17	20.92	37.21	25.21	49.06	12.32	17	6	7	2	2	8	5	5	4	5	18	19	10	11
FALSE	High	Master Protein	S5FZ36	Heat shock protein 70 OS=Nosema antheraeae OX=332525 PE=3 SV=1		0.01	FALSE	2.187	1	1	5	1	645	72.6	8.62			0						2.1								0	0	0				1						1
FALSE	High	Master Protein	A0A0S1MMB1	Heat shock protein 70-2 OS=Antheraea pernyi OX=7119 PE=2 SV=1		0	FALSE	78.228	14	7	114	2	634	70.1	5.74	12.47	12.83	8.11	0	2.87	17.65	20.63	13.8	2.8	1.61	25.74	13.98	15.23	2.82		20.34	37.77	19.19	45.51	19.04	4	2	2	1	1	3	3	4	1	1	4	4	4	1
FALSE	High	Master Protein	A0A088A7J2	Helicase C-terminal domain-containing protein OS=Apis mellifera OX=7460 PE=4 SV=1		0	FALSE	6.472	23	2	5	1	106	12.4	9.92	4.73										0		1.69						0		2										1		1
FALSE	High	Master Protein	A0A0U5YFJ5	Heme/hemopexin utilization protein C OS=Serratia marcescens OX=615 GN=hxuC_1 PE=3 SV=1		0	FALSE	15.5	7	4	6	4	693	75.2	5.44																				15.99
FALSE	High	Master Protein	A0A0A5LSM3	Hemolysin-coregulated protein (Uncharacterized) OS=Serratia marcescens OX=615 GN=hcp1_1 PE=4 SV=1		0	FALSE	25.069	33	3	6	3	160	16.8	6.52																				17.66
FALSE	High	Master Protein	A0A0A5TBI5	Hemolysin-coregulated protein (Uncharacterized) OS=Serratia marcescens OX=615 GN=hcp1_2 PE=4 SV=1		0	FALSE	15.772	41	5	14	5	174	19.2	5.63				0	3.62										4.1					5.46				1	1
FALSE	High	Master Protein	A0A088AR59	Hepatocyte growth factor-regulated tyrosine kinase substrate OS=Apis mellifera OX=7460 GN=Hrs PE=4 SV=1		0.002	FALSE	3.398	1	1	3	1	822	91.1	8.12						1.78										2.38			2.13							1
FALSE	High	Master Protein	A0A088AQM3	HIG1 domain-containing protein OS=Apis mellifera OX=7460 GN=102656599 PE=4 SV=1		0	FALSE	5.866	11	1	25	1	106	11.9	9.36	6.49	6.6	6.47	5.87	8.35	3.28	3.29		5.2	3.17	3.29	6.21	3.33	6.1	3.06	5.1					1	1	1	1	1	1	1		1	1	1	1	1	1
FALSE	High	Master Protein	B6UV78	High-molecular-weight protein 1 (Fragment) OS=Enterococcus faecalis OX=1351 PE=4 SV=1		0.006	FALSE	2.546	4	1	1	1	264	29.3	6.65																				2.77
FALSE	High	Master Protein	A0A093SPA4	Histidine ABC transporter substrate-binding protein HisJ OS=Pectobacterium carotovorum subsp. carotovorum OX=555 GN=KP17_09215 PE=3 SV=1		0	FALSE	12.839	12	2	3	1	259	28	5.45																				9.49
FALSE	High	Master Protein	A0A0N7JQ18	Histidine ABC transporter substrate-binding protein HisJ OS=Serratia marcescens OX=615 GN=AR325_20205 PE=3 SV=1		0	FALSE	18.434	20	4	6	3	260	28.2	8.25																				18.11
FALSE	High	Master Protein	A0A2G4P1H1	Histidine ammonia-lyase OS=Serratia marcescens OX=615 GN=hutH PE=3 SV=1		0	FALSE	4.325	2	1	1	1	511	54.6	6																				2.57
FALSE	High	Master Protein	A0A221FT77	Histidine--tRNA ligase OS=Serratia marcescens OX=615 GN=hisS PE=3 SV=1		0	FALSE	10.551	6	2	2	2	424	47.1	5.47																				6.5
FALSE	High	Master Protein	A0A0G3SNK7	Histidinol-phosphate aminotransferase OS=Serratia marcescens OX=615 GN=hisC PE=3 SV=1		0	FALSE	5.908	6	2	2	2	362	39.8	5.38																				5.31
FALSE	High	Master Protein	A0A088A803	Histone H2A OS=Apis mellifera OX=7460 GN=726468 PE=3 SV=1		0	FALSE	106.018	60	5	596	3	124	13.4	10.73	63.17	65.5	60.45	58.48	38.3	54.21	76.29	63.2	52.64	63.57	43.49	45.6	58.17	21.36	22.28	32.11	175.22	156.88	151.94	18.54	4	4	5	5	5	4	4	4	4	5	4	4	4	3
FALSE	High	Master Protein	A0A087ZWQ7	Histone H2A OS=Apis mellifera OX=7460 GN=His2Av PE=3 SV=1		0	FALSE	48.836	54	5	368	3	128	13.4	10.58	19.2	25.79	23.73	19.27	17.71	21.38	27.94	24.6	21.37	24.58	17.5	19.01	21.06	8.26	11.59	17.57	62.15	60.96	62.44	5.91	2	3	2	2	3	3	3	3	3	2	2	2	3	2
FALSE	High	Master Protein	A0A088A824	Histone H2B OS=Apis mellifera OX=7460 GN=725344 PE=3 SV=1		0	FALSE	74.229	37	6	731	4	123	13.7	10.39	65.73	60.89	59.61	38.97	70.05	49.27	72.76	60.58	57.22	61.52	56.56	58.39	66.3	32.77	41.99	56.01	213.35	187.8	193.79	11.58	5	5	4	5	5	4	5	5	5	4	4	4	5	4
FALSE	High	Master Protein	A0A088A805	Histone H2B OS=Apis mellifera OX=7460 GN=726487 PE=3 SV=1		0	FALSE	36.555	28	3	435	1	126	14	10.32	44.09	49.41	38.76	27.11	55.48	27.34	43.08	35.05	34.62	45.72	40.71	45.34	53.08	17.07	23.37	5.37	11.36	13.26	6.71	5.02	3	2	2	2	2	2	2	2	2	2	2	2	2	2
FALSE	High	Master Protein	A0A088A825	Histone H2B OS=Apis mellifera OX=7460 GN=LOC725238 PE=3 SV=1		0	FALSE	117.991	34	11	295	11	224	23.6	10.49	74.42	68.35	57.12	45.87	25.6	47.03	68.52	55.03	38.99	32.19	34.99	49.29	50.33	33.68	19.35	24.02	43.12	60.61	44.93	8.46	8	5	4	4	3	5	8	5	5	4	3	6	5	4
FALSE	High	Master Protein	H9K244	Histone H3 OS=Apis mellifera OX=7460 GN=LOC726542 PE=3 SV=1		0	FALSE	76.7	49	6	371	1	136	15.4	11.27	68.67	80.14	72.59	45.94	54.34	29.64	44.02	40.53	34.65	62.73	15.62	20.27	21.42	7.76	15.77	8.16	48.25	81.4	39.87		5	6	6	6	5	5	6	6	5	6	3	5	6	4
FALSE	High	Master Protein	H9K759	Histone H3 OS=Apis mellifera OX=7460 GN=LOC726692 PE=3 SV=1		0	FALSE	50.02	49	6	331	1	136	15.3	11.27	54.91	74.78	50.62	41.78	40.32	27.77	38.67	44.89	26.82	54.97	15.62	20.27	21.42	7.76	15.77	8.16	31.1	58.09	27.54		5	6	6	6	5	5	6	6	5	6	3	5	5	4
FALSE	High	Master Protein	H9KL77	Histone H4 OS=Apis mellifera OX=7460 GN=724757 PE=3 SV=1		0	FALSE	134.483	53	9	1019	9	103	11.4	11.36	103.81	114.7	119.86	85.93	127.11	98.35	111.14	95.36	98.97	92.84	90.97	96.85	108.41	48.94	70.06	70.87	326.65	411.29	328.25	23.22	8	8	8	8	8	8	8	8	8	7	7	8	7	5
FALSE	High	Master Protein	A0A088ANV4	HIT domain-containing protein OS=Apis mellifera OX=7460 GN=LOC552803 PE=4 SV=1		0	FALSE	4.894	8	1	1	1	142	16.8	8.73																	2.56
FALSE	High	Master Protein	A0A088AA27	HIT domain-containing protein OS=Apis mellifera OX=7460 PE=4 SV=1		0	FALSE	45.187	40	3	48	3	126	14	7.59	16.88	10.02	7.43	3.27	4.25	15.87		6.89	3.88	8.51	27.35	29.86	4.86	11.09		5.99	6.91		14.24		2	2	1	1	1	2		2	1	1	2	3	1	2
FALSE	High	Master Protein	A0A088AV07	HMA domain-containing protein OS=Apis mellifera OX=7460 GN=LOC725138 PE=4 SV=1		0	FALSE	5.306	24	1	9	1	72	8	6.54	1.96					0					0	3.47	1.85	0							1					1					1	1	1	1
FALSE	High	Master Protein	A0A0B4J2N3	HTH cro/C1-type domain-containing protein OS=Apis mellifera OX=7460 GN=mbf1 PE=4 SV=1		0.01	FALSE	2.163	7	1	1	1	147	16.3	10.2												1.88																				1
FALSE	High	Master Protein	A0A087ZV67	HTH La-type RNA-binding domain-containing protein OS=Apis mellifera OX=7460 GN=LOC411476 PE=4 SV=1		0	FALSE	6.672	3	1	1	1	662	71.3	6.99											2.52																				1
FALSE	High	Master Protein	A0A2G5RXK7	HTH-type transcriptional regulator CysB OS=Serratia marcescens OX=615 GN=CS367_04480 PE=4 SV=1		0.002	FALSE	3.377	4	1	1	1	324	36	7.34																				2.6
FALSE	High	Master Protein	I1VC83	Hyaluronidase OS=Apis mellifera carnica OX=88217 PE=2 SV=1		0	FALSE	4.39	5	1	1	1	381	44.1	8.68										2.73																				1
FALSE	High	Master Protein	A0A221FN22	Hydroxyproline-2-epimerase OS=Serratia marcescens OX=615 GN=BVG93_05840 PE=3 SV=1		0	FALSE	8.887	12	2	2	2	315	34.3	6.14																				5.33
FALSE	High	Master Protein	A0A1Q4P515	Hydroxypyruvate isomerase OS=Serratia marcescens OX=615 GN=BHU62_04170 PE=3 SV=1		0	FALSE	8.15	9	2	2	2	259	29.6	5.25																				6.58
FALSE	High	Master Protein	Q10416	Hymenoptaecin OS=Apis mellifera OX=7460 PE=2 SV=1		0	FALSE	5.677	23	2	2	2	129	14.5	9.42						5.59																				2
FALSE	High	Master Protein	A0A088AEI7	I/LWEQ domain-containing protein OS=Apis mellifera OX=7460 PE=4 SV=1		0	FALSE	98.422	39	13	89	13	490	53.3	6.4	24.29	30.2	7.23	0	3.15	2.74	25.55	5.35	4.39		13.84	12.68	23.73	0		9.91	27.43	10.73	5.16		7	7	4	1	3	1	7	3	3		6	6	8	1
FALSE	High	Master Protein	A0A096XH51	Icarapin variant 1 (Fragment) OS=Apis mellifera carnica OX=88217 GN=icarapin PE=2 SV=1		0	FALSE	36.872	30	6	30	6	204	22.7	4.56	5.63	3.25		3.04		2.97	8.64	3.78	3.39	2.15	5.58	18.29				4.49	12.88	7.28	2.56		2	1		1		1	3	1	1	1	2	5
FALSE	High	Master Protein	A0A087ZP77	IF3_N domain-containing protein OS=Apis mellifera OX=7460 PE=4 SV=1		0	FALSE	10.637	9	2	9	2	227	26.8	9.61	2.68	4.85	2.69				2.62	2.59			0		0						1.7		1	1	1				1	1			1		1
FALSE	High	Master Protein	A0A1C3HBG6	Imidazole glycerol phosphate synthase subunit HisF OS=Serratia marcescens OX=615 GN=hisF PE=3 SV=1		0	FALSE	5.039	6	1	1	1	258	28.5	5.03																				3.18
FALSE	High	Master Protein	A0A088A291	Importin N-terminal domain-containing protein OS=Apis mellifera OX=7460 GN=Cas PE=4 SV=1		0	FALSE	5.023	4	2	2	2	967	110.2	5.9	2.41												0								1												1
FALSE	High	Master Protein	A0A087ZMS1	Importin N-terminal domain-containing protein OS=Apis mellifera OX=7460 GN=emb PE=4 SV=1		0	FALSE	46.433	12	9	37	9	1062	122.3	5.6	15.79	1.95	7.57			1.72	4.81	1.98			7.64	7.43	13.12			3.91	5.19	5.46	2.13		5	1	3			1	1	1			4	4	4
FALSE	High	Master Protein	A0A088A9P3	Importin N-terminal domain-containing protein OS=Apis mellifera OX=7460 GN=LOC412817 PE=4 SV=1		0	FALSE	18.391	8	6	13	6	1080	121.4	4.84	0	0	0							0		5.21	0		1.72						2	2	1							1		4	2
FALSE	High	Master Protein	A0A088AF88	Importin N-terminal domain-containing protein OS=Apis mellifera OX=7460 GN=Ranbp16 PE=4 SV=1		0.004	FALSE	2.686	1	1	1	1	1100	125.3	6.34																			0
FALSE	High	Master Protein	A0A087ZMX9	Importin N-terminal domain-containing protein OS=Apis mellifera OX=7460 PE=4 SV=1		0	FALSE	53.535	15	9	37	9	890	98.8	4.86	8.92	4.34	0			0	13.39			8.39	8.18	13.26	10.12	2.14			8.1		3.49		3	2	2			1	5			3	4	4	3	1
FALSE	High	Master Protein	A0A088ABZ7	Importin N-terminal domain-containing protein OS=Apis mellifera OX=7460 PE=4 SV=1		0	FALSE	18.217	7	5	9	5	1029	117.8	5.03	2.81										3.38	4.6	2.64				2.62				1										1	4	1
FALSE	High	Master Protein	A0A088AFX0	Importin N-terminal domain-containing protein OS=Apis mellifera OX=7460 PE=4 SV=1		0	FALSE	4.58	1	1	5	1	1011	115.7	5.34							2.47				4.24	2.25	2.45														1				1	1	1
FALSE	High	Master Protein	A0A088ADV7	Importin subunit alpha OS=Apis mellifera OX=7460 GN=Kap-alpha1 PE=3 SV=1		0	FALSE	24.099	11	5	11	5	530	58.7	5.34							2.09				8.58	5.09	0	0		0	2.13		0								1				3	2	1	1
FALSE	High	Master Protein	A0A088ANJ0	Importin subunit alpha OS=Apis mellifera OX=7460 GN=Kap-alpha3 PE=3 SV=1		0	FALSE	39.517	21	5	18	5	516	57.3	5.17	10.14	2.82					2.15	0			10.56	6.29	3.3			1.95	4.28	6.84	2.19		3	1					1	1			3	2	1
FALSE	High	Master Protein	A0A0G3SR90	Inhibitor of vertebrate lysozyme OS=Serratia marcescens OX=615 GN=ivy PE=4 SV=1		0.004	FALSE	2.712	7	1	1	1	152	17	9.06																				2.33
FALSE	High	Master Protein	A0A088A2D3	Innexin OS=Apis mellifera OX=7460 GN=inx PE=3 SV=1		0	FALSE	11.971	21	2	13	2	149	17	6.65	2.18	5.68	5.4	6.86	6.72	1.73					2.45		2.08					4.08			1	2	2	2	2	1					1		1
FALSE	High	Master Protein	A0A088A2D4	Innexin OS=Apis mellifera OX=7460 GN=inx PE=3 SV=1		0	FALSE	10.397	9	2	8	2	256	30.1	8.72		3.01		5.24	2.87		2.59										2.88	3.27	2.53			1		1	1		1
FALSE	High	Master Protein	A0A088A2C9	Innexin OS=Apis mellifera OX=7460 GN=inx2 PE=3 SV=1		0	FALSE	56.397	23	6	137	6	358	41.5	6.84	18.74	22.85	25.36	21.6	24.59	23.44	23.65	12.78	12.28	14.37	18.59	24.24	20.1	13.13	16.07	14.55	18.61	12.7	4.29	4.94	4	4	5	5	5	4	4	4	4	3	4	4	4	4
FALSE	High	Master Protein	A0A088AID2	Innexin OS=Apis mellifera OX=7460 GN=inx3 PE=3 SV=1		0	FALSE	34.073	31	8	79	8	396	44.6	7.68	7.89	10.74	9.45	13.82	11.54	10.12	7.01	2.58	9.46	8.46	8.71	2.95	7.17	11.55	4.76	11.86	13.06	9.31	8.37	5.58	2	5	4	6	3	3	3	2	4	2	3	2	3	4
FALSE	High	Master Protein	A0A086FJ86	Inorganic pyrophosphatase OS=Serratia marcescens OX=615 GN=ppa PE=3 SV=1		0	FALSE	4.272	11	2	2	2	176	19.6	5.27																				4.65
FALSE	High	Master Protein	A0A088AHY9	Inos-1-P_synth domain-containing protein OS=Apis mellifera OX=7460 GN=Inos PE=4 SV=1		0.01	FALSE	2.148	2	1	1	1	513	57.2	7.71												0																				1
FALSE	High	Master Protein	A0A088A653	Inosine-5'-monophosphate dehydrogenase OS=Apis mellifera OX=7460 GN=ras PE=3 SV=1		0	FALSE	7.814	4	2	4	2	523	56.6	8.15		0					0											2.36	1.88			1					1
FALSE	High	Master Protein	A0A0M4QVZ6	Inosine-5'-monophosphate dehydrogenase OS=Serratia marcescens OX=615 GN=guaB PE=3 SV=1		0.006	FALSE	2.631	2	1	1	1	487	51.4	6.35																				2.48
FALSE	High	Master Protein	A0A088AVE7	Inositol-1-monophosphatase OS=Apis mellifera OX=7460 GN=726463 PE=3 SV=1		0	FALSE	29.016	29	7	23	7	276	30.8	6.43								11.03	17.04		2.86			20.26														3	6		2			6
FALSE	High	Master Protein	A0A088A4S7	Inositol-1-monophosphatase OS=Apis mellifera OX=7460 GN=LOC409693 PE=3 SV=1		0	FALSE	12.094	15	3	3	3	272	29.8	5.82												5.89					1.93															2
FALSE	High	Master Protein	A0A221HCK8	Inositol-1-monophosphatase OS=Serratia marcescens OX=615 GN=BVG84_16040 PE=3 SV=1		0	FALSE	4.01	10	2	2	2	267	29.3	8.15															0					2.04
FALSE	High	Master Protein	P23302	Integration host factor subunit alpha OS=Serratia marcescens OX=615 GN=ihfA PE=3 SV=2		0	FALSE	11.535	31	3	7	3	99	11.2	9.63														2.7						17.28														1
FALSE	High	Master Protein	A0A088AEN2	Integrin alpha-PS2 OS=Apis mellifera OX=7460 PE=3 SV=1		0	FALSE	142.971	24	26	183	26	1525	172.2	5.86	24.18	40.33	39.56	35.89	46.41	11.88	47.21	20.55	14.85	19.94	15.87	15.4	35.87	7.15	10.12	8.89	46.37	30.1	2.73		7	11	9	11	13	6	10	6	5	6	6	4	9	2
FALSE	High	Master Protein	A0A088A788	Integrin beta OS=Apis mellifera OX=7460 PE=3 SV=1		0	FALSE	117.465	30	18	170	18	761	84.9	5.49	22.75	35.01	28.5	23.53	32.25	15	37.42	16.32	19.57	35.35	16.88	25.86	21.9	13.86	11.76	4.9	15.27	17.76	11.18		7	10	8	7	10	4	11	6	6	11	5	9	6	6
FALSE	High	Master Protein	A0A088ACX9	Integrin_alpha2 domain-containing protein OS=Apis mellifera OX=7460 GN=mew PE=3 SV=1		0	FALSE	16.816	4	4	12	4	1101	123.7	6.18		2.3	4.48	0			4.9	2.78		2.18		0	4.54									1	2	1			2	2		1		1	2
FALSE	High	Master Protein	A0A088A2J5	Ion_trans_2 domain-containing protein OS=Apis mellifera OX=7460 PE=4 SV=1		0	FALSE	5.831	2	2	2	2	1490	165.4	6.74							1.7																				2
FALSE	High	Master Protein	A0A0P0QK73	Iron ABC transporter substrate-binding protein OS=Serratia marcescens OX=615 GN=AR325_23320 PE=4 SV=1		0	FALSE	13.559	9	2	2	2	362	39.4	6.35																				6.45
FALSE	High	Master Protein	A0A1C3HGF3	Iron complex transport system substrate-binding protein OS=Serratia marcescens OX=615 GN=PWN146_02790 PE=4 SV=1		0	FALSE	4.145	3	1	2	1	317	34.1	9.41														2.28	1.99																			1
FALSE	High	Master Protein	A0A1Q5WCF9	Iron-binding protein OS=Serratia marcescens OX=615 GN=A8A12_05775 PE=3 SV=1		0	FALSE	16.412	8	2	6	2	314	34.8	8.66																				18.67
FALSE	High	Master Protein	A0A0P0QCL9	Iron-sulfur cluster carrier protein OS=Serratia marcescens OX=615 GN=AR325_10090 PE=3 SV=1		0.004	FALSE	2.873	3	1	1	1	370	39.7	6.23																				2.39
FALSE	High	Master Protein	A0A088AKC5	Iso_dh domain-containing protein OS=Apis mellifera OX=7460 GN=LOC410396 PE=4 SV=1		0	FALSE	172.62	54	15	338	15	384	42.4	8.97	114.6	59.55	67.16	13.61	18.99	83.93	81.18	83.51	36.27	43.72	86.1	85.43	80.28	63.38		44.75	46.77	27.06	11.73		13	11	11	5	4	14	11	10	9	6	11	11	8	11
FALSE	High	Master Protein	A0A088AA38	Isochorismatase domain-containing protein OS=Apis mellifera OX=7460 GN=LOC410420 PE=4 SV=1		0	FALSE	59.053	44	8	142	8	203	22.4	8.35	31.11	14.39	12.63	8.15		11.3	18.91	15.14	7.87	2.86	35.1	25.03	9.95	23.29		15.05	28.14	17.66	26.86		7	4	3	2		4	6	5	2	1	6	7	4	5
FALSE	High	Master Protein	A0A1Q4NV04	Isochorismatase OS=Serratia marcescens OX=615 GN=BHU62_21335 PE=4 SV=1		0	FALSE	25.127	25	5	6	5	286	32.4	4.88																				18.83
FALSE	High	Master Protein	A5JMV8	Isocitrate dehydrogenase (Fragment) OS=Pectobacterium carotovorum subsp. carotovorum OX=555 GN=icdA PE=4 SV=1		0	FALSE	38.34	50	7	18	1	159	17.8	5.14					1.83									4.06	1.68					32.22					1									2
FALSE	High	Master Protein	A0A088AAU7	Isocitrate dehydrogenase [NAD] subunit, mitochondrial OS=Apis mellifera OX=7460 GN=LOC409292 PE=3 SV=1		0	FALSE	198.951	56	20	609	20	358	39.1	7.59	168.16	86.8	85.25	15.38	30.39	71.67	80.12	96.59	34.31	52.27	105.26	106.18	73.77	72.46		99.42	151.15	71.52	66.9		20	16	15	8	9	15	16	16	13	10	15	16	16	14
FALSE	High	Master Protein	A0A088ABZ1	Isocitrate dehydrogenase [NAD] subunit, mitochondrial OS=Apis mellifera OX=7460 GN=LOC552128 PE=3 SV=1		0	FALSE	112.943	48	13	282	13	374	40.9	8.7	96.19	66.86	48.12	6.68	8.21	32.81	62.49	54.31	12.18	26.38	52.39	67.09	36.02	21.47		20.12	47.32	19.96	15.43		12	11	11	2	3	8	11	12	5	6	9	10	10	8
FALSE	High	Master Protein	A0A088A1Z9	Isocitrate dehydrogenase [NADP] OS=Apis mellifera OX=7460 PE=3 SV=1		0	FALSE	129.27	53	21	249	21	409	46.6	7.3	55.29	29.27	37.87	8.7	23.84	34.92	9.7	40.8	20.4	29.43	42.98	54.63	30.74	42.12		19.17	29.76	26.36	29.37		15	8	9	4	9	9	3	10	7	8	10	10	7	12
FALSE	High	Master Protein	A0A093SSK5	Isocitrate dehydrogenase [NADP] OS=Pectobacterium carotovorum subsp. carotovorum OX=555 GN=KP17_00210 PE=4 SV=1		0	FALSE	47.64	30	11	45	2	417	45.9	5.2					13.91				10.21	6.08				19.81	11.62			2.71		45.03					4				3	1				6
FALSE	High	Master Protein	A0A2G4QGA9	Isocitrate dehydrogenase [NADP] OS=Serratia marcescens OX=615 GN=CS371_09695 PE=4 SV=1		0	FALSE	98.757	52	18	142	10	417	45.7	5.78	2.31			2.58	31.13	0			21.5	9.01	9.86			33.11	28.64			2.71		222.52	1			1	7	2			4	2	2			6
FALSE	High	Master Protein	A0A1C3HJX5	Isocitrate dehydrogenase kinase/phosphatase OS=Serratia marcescens OX=615 GN=aceK PE=3 SV=1		0.009	FALSE	2.294	2	1	1	1	595	68.8	7.14																				2.8
FALSE	High	Master Protein	A0A093UR78	Isocitrate lyase OS=Pectobacterium carotovorum subsp. carotovorum OX=555 GN=KP17_17710 PE=4 SV=1		0	FALSE	25.376	14	4	14	2	435	48	5.5									4.57					10.55						18.35									2					2
FALSE	High	Master Protein	V5YVA2	Isocitrate lyase OS=Serratia marcescens OX=615 GN=aceA PE=4 SV=1		0	FALSE	99.847	53	15	42	13	442	48.1	5.59									5.28					4.76						124.47									2					2
FALSE	High	Master Protein	A0A1C3H8J5	Isoleucine--tRNA ligase OS=Serratia marcescens OX=615 GN=ileS PE=3 SV=1		0	FALSE	12.402	5	4	6	4	938	104.4	5.94																				13.21
FALSE	High	Master Protein	A0A088AJ48	J domain-containing protein OS=Apis mellifera OX=7460 GN=100577992 PE=3 SV=1		0	FALSE	3.986	4	1	1	1	251	29.6	7.74																		1.73
FALSE	High	Master Protein	A0A087ZRF8	J domain-containing protein OS=Apis mellifera OX=7460 GN=LOC408863 PE=4 SV=1		0	FALSE	44.386	47	6	10	6	176	19.9	6.21	6.51					2.32					4.83								8.77		2					1					2
FALSE	High	Master Protein	A0A087ZSR8	J domain-containing protein OS=Apis mellifera OX=7460 GN=LOC408966 PE=4 SV=1		0	FALSE	41.6	23	4	32	4	290	32.6	9.47	7.5	10.4	7.15	0	4.9	7.3	13.35	6.04	6.13		4.02	4.75	7.14			0	10.17	2.88			1	2	1	1	1	1	2	1	1		1	1	2
FALSE	High	Master Protein	A0A087ZY83	J domain-containing protein OS=Apis mellifera OX=7460 GN=LOC409991 PE=4 SV=1		0	FALSE	21.688	10	5	25	5	561	64	8.06	10.69	5.47	5.17	4.24	6.31	2.49	5.45	2.65	2.4				2.73		0	0	6.69	5.43			3	2	1	2	2	1	2	1	1				1
FALSE	High	Master Protein	A0A088A635	J domain-containing protein OS=Apis mellifera OX=7460 GN=LOC411071 PE=4 SV=1		0	FALSE	74.334	53	15	158	15	354	39.1	9.13	34.85	41.77	15.57	1.81	10.96	24.13	22.69	9.5	4.75	10.71	36.41	30.18	24.21	19.65	11.46	9.64	10.63	9.19	8.02		10	11	6	1	4	10	9	3	4	5	12	9	7	7
FALSE	High	Master Protein	A0A088ABA4	J domain-containing protein OS=Apis mellifera OX=7460 GN=LOC412505 PE=4 SV=1		0	FALSE	16.422	8	4	6	4	761	88.2	6.52	2.12	2.13	4.79														3.21	1.61			1	1	2
FALSE	High	Master Protein	A0A088AEP5	J domain-containing protein OS=Apis mellifera OX=7460 PE=4 SV=1		0	FALSE	13.609	6	1	9	1	223	24.4	5.11	3.38						3				3.05		2.76			1.75	6.78	3.2	2.75		1						1				1		1
FALSE	High	Master Protein	A0A088AJE9	J domain-containing protein OS=Apis mellifera OX=7460 PE=4 SV=1		0	FALSE	38.894	24	5	18	5	358	40.4	5.85		4.34						2.5			2.21	2.67				1.94	6.19	12.06	9.61			2						1			2	1
FALSE	High	Master Protein	A0A088AUA1	KA1 domain-containing protein OS=Apis mellifera OX=7460 PE=4 SV=1		0	FALSE	10.329	13	1	3	1	135	15.2	8.94																	4.03	3.02	0
FALSE	High	Master Protein	A0A087ZMR7	KASH domain-containing protein OS=Apis mellifera OX=7460 PE=4 SV=1		0	FALSE	34.893	2	9	13	9	7454	850.8	4.86	0	4.9					2.38	2.7			2.23						3.16	3.92			1	4					3	1			1
FALSE	High	Master Protein	A0A088AEW6	Kazal-like domain-containing protein OS=Apis mellifera OX=7460 GN=102656354 PE=4 SV=1		0	FALSE	6.399	18	1	1	1	119	12.4	8.54										5.31																				1
FALSE	High	Master Protein	A0A0G8B3P1	Ketol-acid reductoisomerase (NADP(+)) OS=Serratia marcescens OX=615 GN=ilvC PE=3 SV=1		0	FALSE	39.316	29	11	28	1	491	53.7	5.43					2.95				3.95					4.49						57.92					1				2					3
FALSE	High	Master Protein	A0A0P0Q8L0	Ketol-acid reductoisomerase (NADP(+)) OS=Serratia marcescens OX=615 GN=ilvC PE=3 SV=1		0	FALSE	38.966	29	11	27	1	491	53.7	5.43					2.95				3.95					4.49						54.85					1				2					3
FALSE	High	Master Protein	A0A088AGZ4	KH domain-containing protein OS=Apis mellifera OX=7460 GN=408710 PE=4 SV=1		0	FALSE	51.388	27	9	47	9	397	45.3	8.84	5.51	17.1	2.39	4.13	1.96	2.52	17.93	2.42	1.92	2.17	5.06	2.21	7.18	2.33		0	2.61	0	0		3	5	2	1	1	1	6	2	1	1	1	3	2	1
FALSE	High	Master Protein	A0A088AJJ4	KH domain-containing protein OS=Apis mellifera OX=7460 GN=LOC551376 PE=4 SV=1		0.002	FALSE	3.09	3	1	1	1	349	40.6	6.89											1.62																				1
FALSE	High	Master Protein	A0A087ZVJ6	KH domain-containing protein OS=Apis mellifera OX=7460 PE=4 SV=1		0	FALSE	9.422	13	1	6	1	143	15.3	7.99	4.67			2.15			5.1		3.55			2.59	2.89								1			1			1		1			1	1
FALSE	High	Master Protein	A0A087ZVJ7	KH domain-containing protein OS=Apis mellifera OX=7460 PE=4 SV=1		0	FALSE	23.641	23	4	19	4	303	30	9.01	2.22	0				0	0	0		0	3.29	0					4.13		2.09		2	1				1	1	1		1	2	1
FALSE	High	Master Protein	A0A088ADI9	KH domain-containing protein OS=Apis mellifera OX=7460 PE=4 SV=1		0	FALSE	12.864	13	4	5	4	321	35.1	7.23											5.65					1.74	2.34														2
FALSE	High	Master Protein	A0A088AV85	KH type-2 domain-containing protein OS=Apis mellifera OX=7460 GN=RpS3 PE=4 SV=1		0	FALSE	129	68	15	321	15	242	26.8	9.66	69.6	65.27	47.29	26.34	30	41.95	52.75	33.42	13.43	21.27	65	40.62	56.75	25.58	28.02	38.62	59.47	54.97	57.96	2.82	15	14	13	11	9	12	13	9	6	6	13	10	12	8
FALSE	High	Master Protein	A0A1Q5WEL1	Kinase inhibitor OS=Serratia marcescens OX=615 GN=A8A12_09850 PE=4 SV=1		0	FALSE	4.636	13	1	1	1	160	16.9	5.63																				3.77
FALSE	High	Master Protein	A0A088A7G3	Kinesin-like protein OS=Apis mellifera OX=7460 PE=3 SV=1		0	FALSE	132.63	30	22	90	22	969	110.3	6.18	31.31	7.85		0	1.73	4.58	21.08	5.68		2.54	34.23	26.96	19.49	4		11.89	20.76	14.78	7.2		11	3		1	1	2	6	2		1	9	8	6	2
FALSE	High	Master Protein	A0A088AV41	KOW domain-containing protein OS=Apis mellifera OX=7460 GN=mRpL24 PE=3 SV=1		0	FALSE	14.59	14	3	24	3	253	30.1	9.79	4.06	4.17	3.87	2.13	6.21		7.73	5.68	2.08	0	5.26	5.79	3.98	1.73		1.78					1	1	1	1	2		2	2	1	1	2	2	2	1
FALSE	High	Master Protein	A0A088AEV2	KOW domain-containing protein OS=Apis mellifera OX=7460 GN=RpL26 PE=4 SV=1		0	FALSE	29.804	32	6	101	6	148	17.4	10.86	14.91	13.23	7.77	6.19	9.31	9.64	17.47	4.43	4.31	9.57	13.47	3.03	10.98	3.76	5.81	4.24	3.01	2.8	5.55		4	5	3	4	4	4	6	4	4	3	4	2	4	3
FALSE	High	Master Protein	A0A088AVX5	L51_S25_CI-B8 domain-containing protein OS=Apis mellifera OX=7460 GN=LOC727049 PE=4 SV=1		0	FALSE	39.569	63	6	158	6	94	11	9.45	23.46	19.7	15.53	10.87	12.9	15.71	25.46	21.14	11.91	11.47	25.47	31.19	26.32	12.8	12.55	8.67	12.04	9.64	1.92	4.67	5	6	5	5	4	6	5	6	6	5	6	6	6	6
FALSE	High	Master Protein	A0A088AGJ0	L51_S25_CI-B8 domain-containing protein OS=Apis mellifera OX=7460 GN=mRpL43 PE=4 SV=1		0	FALSE	10.527	16	2	26	2	191	22.5	8.73	8.75	8.01	5.39	0	2.19	3.56	5.06	3.68	2.06	0	4.63	4.7	2.25	1.8	0						2	2	2	1	2	1	1	1	1	1	1	1	1	1
FALSE	High	Master Protein	A0A087ZV44	L51_S25_CI-B8 domain-containing protein OS=Apis mellifera OX=7460 GN=mRpS25 PE=4 SV=1		0	FALSE	22.41	28	4	21	4	169	19.5	9	2.54	3.95					10.59		0	2.25	8.87		6.53	0	0		7.11	2.78			1	1					3		1	1	3		2	1
FALSE	High	Master Protein	A0A088A1D9	Lactamase_B domain-containing protein OS=Apis mellifera OX=7460 GN=LOC408355 PE=4 SV=1		0.01	FALSE	2.216	3	1	1	1	293	33.4	8.73											2.1																				1
FALSE	High	Master Protein	A0A088AAM8	Lactamase_B domain-containing protein OS=Apis mellifera OX=7460 GN=LOC410023 PE=4 SV=1		0	FALSE	56.316	35	8	42	8	276	31	7.34	31.39	5.87	9.94				13.42	3.37			4.97	32	2.28	2.39			3.03	2.12			7	2	3				3	1			2	6	1	1
FALSE	High	Master Protein	A0A087ZZF5	Lactamase_B domain-containing protein OS=Apis mellifera OX=7460 PE=3 SV=1		0	FALSE	26.536	26	5	11	5	298	34.1	7.27		1.65									6.07	6.67					7.91					1									3	4
FALSE	High	Master Protein	A0A088ALN9	Lactoylglutathione lyase OS=Apis mellifera OX=7460 PE=3 SV=1		0	FALSE	18.089	21	3	13	3	183	21.1	5.64	2.82	0				2.96					6.17	3.01	2.91						6.26		1	1				1					2	2	1
FALSE	High	Master Protein	A0A088AFH0	LAM_G_DOMAIN domain-containing protein OS=Apis mellifera OX=7460 PE=4 SV=1		0	FALSE	13.299	4	4	6	4	1428	159.6	4.82											1.65	0				0	7.43														1	1
FALSE	High	Master Protein	A0A088ALQ6	Laminin N-terminal domain-containing protein OS=Apis mellifera OX=7460 PE=4 SV=1		0	FALSE	7.355	18	1	9	1	117	12.9	5.08		4.08	4.38	3.45	3.56		2.88	7.41				9.06										1	1	1	1		1	1				1
FALSE	High	Master Protein	A0A093S7T4	L-arabinose isomerase OS=Pectobacterium carotovorum subsp. carotovorum OX=555 GN=araA PE=3 SV=1		0.009	FALSE	2.238	2	1	2	1	501	55.9	6.01																				5.01
FALSE	High	Master Protein	A0A093SLZ4	L-arabinose transporter permease OS=Pectobacterium carotovorum subsp. carotovorum OX=555 GN=araH PE=3 SV=1		0.004	FALSE	2.712	4	1	1	1	328	34.2	9.1																				3.06
FALSE	High	Master Protein	A0A093USC3	L-arabinose-binding periplasmic protein OS=Pectobacterium carotovorum subsp. carotovorum OX=555 GN=KP17_16650 PE=3 SV=1		0	FALSE	9.871	11	3	4	3	327	35.3	7.42																				11.67
FALSE	High	Master Protein	A0A1Q5WG17	Large-conductance mechanosensitive channel OS=Serratia marcescens OX=615 GN=mscL PE=3 SV=1		0	FALSE	29.7	13	3	7	3	138	15.2	7.25																				27.22
FALSE	High	Master Protein	A0A2G4QM96	L-asparaginase 2 OS=Serratia marcescens OX=615 GN=CS370_17165 PE=3 SV=1		0	FALSE	8.119	5	1	1	1	348	36.7	6.25																				2.24
FALSE	High	Master Protein	A0A088A0L8	LEM domain-containing protein OS=Apis mellifera OX=7460 PE=4 SV=1		0	FALSE	78.008	26	15	61	15	788	89.3	8.32	12.49	16.72	1.89	0	1.84	10.13	21.07	7.89	7.03		10.92	5.05	10.63	2.45	1.74	0	8.71	8.86	0		5	7	2	1	2	3	7	3	3		3	2	2	1
FALSE	High	Master Protein	A0A088AAR0	Letm1 RBD domain-containing protein OS=Apis mellifera OX=7460 GN=LOC727277 PE=4 SV=1		0.001	FALSE	3.94	4	1	6	1	346	41.6	9.98	1.74		1.68	0	1.97		2.14		0												1		1	1	1		1		1
FALSE	High	Master Protein	A0A087ZUY2	Leucine carboxyl methyltransferase 1 OS=Apis mellifera OX=7460 GN=LOC409320 PE=3 SV=1		0	FALSE	5.465	5	1	2	1	316	36.2	5.57	2.73													2.23							1													1
FALSE	High	Master Protein	A0A093T9S3	Leucine-responsive transcriptional regulator OS=Pectobacterium carotovorum subsp. carotovorum OX=555 GN=KP17_03475 PE=4 SV=1		0	FALSE	29.106	48	7	17	7	164	18.9	8.78									2.22					12.82	0					18.3									1					5
FALSE	High	Master Protein	A0A221FL24	Leucine--tRNA ligase OS=Serratia marcescens OX=615 GN=leuS PE=3 SV=1		0	FALSE	13.017	4	3	4	3	860	97.1	5.22																				11.45
FALSE	High	Master Protein	A0A087ZZ69	Ligase_CoA domain-containing protein OS=Apis mellifera OX=7460 PE=4 SV=1		0	FALSE	7.004	18	2	7	2	118	12.6	8.69								1.83			2.18		2.11	2.18		1.71		2.19	2.16									1			1		1	1
FALSE	High	Master Protein	A0A088A8B0	LIM domain-containing protein OS=Apis mellifera OX=7460 GN=LOC551547 PE=4 SV=1		0	FALSE	5.666	5	2	13	2	342	39.5	7.93		0	0		0		2.13		0	0	0		0						0			1	1		1		1		1	1	1		1
FALSE	High	Master Protein	A0A088ATA8	LIM zinc-binding domain-containing protein OS=Apis mellifera OX=7460 PE=4 SV=1		0.006	FALSE	2.665	16	1	3	1	55	6.5	8.57					1.89					1.67									0						1					1
FALSE	High	Master Protein	A0A0U5U220	Lipase 2 OS=Serratia marcescens OX=615 GN=lip2_1 PE=4 SV=1		0	FALSE	5.052	7	2	2	2	291	32	5.72																				5.1
FALSE	High	Master Protein	A0A087ZXA8	Lipase domain-containing protein OS=Apis mellifera OX=7460 PE=3 SV=1		0	FALSE	72.618	43	10	79	10	312	34.6	8.38					4.63	29.88				3.62			49.53	11.17	29.03					71.48					2	8				2			8	4
FALSE	High	Master Protein	A0A088AQK3	Lipase domain-containing protein OS=Apis mellifera OX=7460 PE=3 SV=1		0.002	FALSE	3.315	5	1	1	1	359	39.9	6.6															2.94
FALSE	High	Master Protein	A0A088AN52	Lipase maturation factor OS=Apis mellifera OX=7460 GN=LOC724741 PE=3 SV=1		0	FALSE	35.659	12	5	46	5	648	75.6	9.26	11.65	19.53	16.06	3.78	10.5	8.14	18.81	6.06	0	5.7	8.99	8.78	18.94	3.34	0	0			0		2	4	4	1	3	3	4	2	1	2	2	2	3	1
FALSE	High	Master Protein	A0A087ZSH4	Lipase OS=Apis mellifera OX=7460 PE=3 SV=1		0	FALSE	67.92	31	12	46	12	406	46.5	6.96			11.01		3.24	29.96							2.69		23.14					27.32			3		2	6							2
FALSE	High	Master Protein	A0A088A7F6	Lipase OS=Apis mellifera OX=7460 PE=3 SV=1		0.002	FALSE	3.085	2	1	3	1	435	50.6	9.36							2.35	2.05		2.54																	1	1		1
FALSE	High	Master Protein	Q59932	Lipase OS=Serratia marcescens OX=615 GN=lipA PE=4 SV=1		0	FALSE	66.919	28	12	21	1	613	64.9	4.78																				64.33
FALSE	High	Master Protein	A0A088A4U1	Lipase_3 domain-containing protein OS=Apis mellifera OX=7460 GN=LOC726798 PE=4 SV=1		0	FALSE	29.277	10	5	29	5	669	76.7	9.07		9.47	0		1.61		12.19			4.1	0	0	12.39	0								2	1		1		4			1	1	1	2	1
FALSE	High	Master Protein	A0A088A4R2	Lipocln_cytosolic_FA-bd_dom domain-containing protein OS=Apis mellifera OX=7460 PE=3 SV=1		0	FALSE	22.445	14	3	22	3	296	33.2	7.53	3.35		5.77	2.29	4.99	6		3.28	3.37		3.42	3.07	3.5	5.08		1.6	3		2.14	5.04	1		1	1	1	1		1	2		1	1	1	1
FALSE	High	Master Protein	A0A088AHA7	Lipocln_cytosolic_FA-bd_dom domain-containing protein OS=Apis mellifera OX=7460 PE=3 SV=1		0	FALSE	16.069	39	5	10	5	174	19.6	5.63						4.42							1.34		10.37					4.32						2							1
FALSE	High	Master Protein	A0A088AHA6	Lipocln_cytosolic_FA-bd_dom domain-containing protein OS=Apis mellifera OX=7460 PE=4 SV=1		0	FALSE	5.063	7	2	2	2	284	31.5	5.67															2.24					2.27
FALSE	High	Master Protein	A0A088AJD2	Lipophorin receptor OS=Apis mellifera OX=7460 PE=4 SV=1		0	FALSE	27.418	7	4	4	4	613	68.5	5.52																			7.45
FALSE	High	Master Protein	A0A0A5NPU5	Lipoprotein OS=Serratia marcescens OX=615 GN=BHU62_01115 PE=4 SV=1		0.002	FALSE	2.963	6	1	1	1	180	19.3	6.55																				2.38
FALSE	High	Master Protein	A0A1Q4NWB8	Lipoprotein OS=Serratia marcescens OX=615 GN=BHU62_19175 PE=3 SV=1		0	FALSE	17.241	17	3	7	2	271	29.4	5.57														2.85	2.85					18.23														1
FALSE	High	Master Protein	A0A2G4P377	Lipoprotein OS=Serratia marcescens OX=615 GN=CS368_20200 PE=3 SV=1		0.006	FALSE	2.478	6	1	1	1	270	29.4	6.16															1.65
FALSE	High	Master Protein	A0A0M4RI22	Lipoprotein OS=Serratia marcescens OX=615 GN=metQ_1 PE=3 SV=1		0	FALSE	7.744	10	2	4	1	271	29.3	6.01						1.64								2.78						6.42						1								1
FALSE	High	Master Protein	A0A087ZZR9	Lipoyl-binding domain-containing protein OS=Apis mellifera OX=7460 GN=LOC409155 PE=4 SV=1		0	FALSE	165.225	33	16	534	16	514	55.6	9.11	141.32	119.84	99.79	64.34	67.05	122.99	119.65	92.59	76.81	78.79	119.5	117.73	89.81	65.91	32.19	48.42	132.47	90.65	36.77	5.39	12	9	9	9	6	11	11	9	10	8	9	9	8	9
FALSE	High	Master Protein	A0A087ZZD5	LisH domain-containing protein OS=Apis mellifera OX=7460 GN=LOC552605 PE=4 SV=1		0.002	FALSE	3.657	1	1	1	1	1112	124.9	5.19												1.83																				1
FALSE	High	Master Protein	A0A088A9S3	L-lactate dehydrogenase OS=Apis mellifera OX=7460 PE=3 SV=1		0	FALSE	36.091	23	7	27	7	463	51.6	9.17			16.58	1.7	2.95	13.8		7.95		3.72			4.47				8.05	2.25	2.75				5	1	1	4		3		1			1
FALSE	High	Master Protein	A0A1B4XKW7	L-lactate dehydrogenase OS=Enterococcus faecalis OX=1351 GN=ldh PE=3 SV=1		0	FALSE	4.938	4	1	1	1	327	35.5	4.89																				3.21
FALSE	High	Master Protein	A0A093V7T9	L-lactate dehydrogenase OS=Pectobacterium carotovorum subsp. carotovorum OX=555 GN=lldD PE=3 SV=1		0.004	FALSE	2.862	4	1	2	1	386	41.7	7.65									2.17																				1
FALSE	High	Master Protein	A0A0G8B3X1	L-lactate dehydrogenase OS=Serratia marcescens OX=615 GN=lldD PE=3 SV=1		0	FALSE	4.564	4	1	1	1	379	40.8	7.59														2.63																				1
FALSE	High	Master Protein	A0A088AHG4	LNS2 domain-containing protein OS=Apis mellifera OX=7460 GN=LOC410201 PE=4 SV=1		0.002	FALSE	3.711	2	1	1	1	1093	124.4	5.41							2.29																				1
FALSE	High	Master Protein	A0A1Q4NW66	LOG family protein OS=Serratia marcescens OX=615 GN=BHU62_18935 PE=4 SV=1		0	FALSE	7.825	3	1	2	1	454	50.8	6.37																				7.36
FALSE	High	Master Protein	A0A088A462	Lon protease homolog, mitochondrial OS=Apis mellifera OX=7460 GN=LOC409459 PE=3 SV=1		0	FALSE	245.613	48	36	351	36	1012	114.7	8.4	115.79	72.76	56.03	15.71	13.5	22.98	104.98	62.98	18.72	17.64	58.15	61.04	53.39	35.04	7.26	43.06	38.9	45.95	20.34		25	17	13	8	6	8	23	15	7	6	16	16	16	12
FALSE	High	Master Protein	A0A2G4QAG3	Lon protease OS=Serratia marcescens OX=615 GN=lon PE=2 SV=1		0	FALSE	27.649	12	8	15	8	784	87.3	6.3									2.41					7.75	1.71					22.6									1					3
FALSE	High	Master Protein	A0A0M4QTX2	Long-chain acyl-CoA thioesterase FadM OS=Serratia marcescens OX=615 GN=fadM PE=4 SV=1		0.004	FALSE	2.824	7	1	1	1	137	15.7	5.86																				2.72
FALSE	High	Master Protein	A0A2G4QCT4	Long-chain fatty acid transporter FadL OS=Serratia marcescens OX=615 GN=CS371_10850 PE=4 SV=1		0	FALSE	31.399	19	5	9	5	440	47.7	5.69																				36.01
FALSE	High	Master Protein	A0A2G4QQB0	Long-chain-fatty-acid--CoA ligase FadD OS=Serratia marcescens OX=615 GN=CS370_13675 PE=4 SV=1		0	FALSE	8.878	6	2	2	2	562	62.6	7.81																				5.47
FALSE	High	Master Protein	A0A2G4QNQ2	LPS-assembly lipoprotein LptE OS=Serratia marcescens OX=615 GN=lptE PE=3 SV=1		0	FALSE	8.721	16	2	2	2	186	20.5	7.44																				5.29
FALSE	High	Master Protein	A0A0P0QA74	LPS-assembly protein LptD OS=Serratia marcescens OX=615 GN=lptD PE=3 SV=1		0	FALSE	6.785	2	1	1	1	786	89.3	5.44																				3.17
FALSE	High	Master Protein	A0A088AI22	LRRCT domain-containing protein OS=Apis mellifera OX=7460 PE=4 SV=1		0	FALSE	18.073	8	4	21	4	691	76	5.05	10.75	4.44				4.71	5.12	2.16			4.85	0	1.81				5.08	0	1.62		3	2				2	2	1			2	1	1
FALSE	High	Master Protein	A0A088AUQ4	LsmAD domain-containing protein OS=Apis mellifera OX=7460 PE=4 SV=1		0	FALSE	5.661	1	1	1	1	960	106.2	9.32																	2.32
FALSE	High	Master Protein	A0A2G4QRB6	L-sorbosone dehydrogenase OS=Serratia marcescens OX=615 GN=CS370_15290 PE=4 SV=1		0	FALSE	11.078	11	4	5	4	433	46.2	6.04																				12.98
FALSE	High	Master Protein	A0A1Q5WH50	L-threonine 3-dehydrogenase OS=Serratia marcescens OX=615 GN=tdh PE=3 SV=1		0	FALSE	4.448	4	1	1	1	341	37.2	6.33																				2.66
FALSE	High	Master Protein	A0A088AEZ9	L-type lectin-like domain-containing protein OS=Apis mellifera OX=7460 GN=Lman2 PE=4 SV=1		0	FALSE	31.464	20	4	5	4	324	37.1	6.73		4.76												1.99				5.02	3.57			1												1
FALSE	High	Master Protein	A0A088AEI5	L-type lectin-like domain-containing protein OS=Apis mellifera OX=7460 GN=LOC550798 PE=4 SV=1		0	FALSE	84.304	39	12	79	12	504	57.8	6.38	10.7	15.09	9.94	8.49	12.08	5.86	27.44	6.62		5.04	26.21	22.82	21.2		10.91	7.15	7.58	2.29	10.95		3	5	4	2	4	3	7	2		3	8	7	7
FALSE	High	Master Protein	A0A088AHQ9	Lyase_1 domain-containing protein OS=Apis mellifera OX=7460 PE=3 SV=1		0	FALSE	190.007	57	18	330	17	439	47.7	7.77	135	73.2	46.66	4.78	20.08	46.19	66.11	66.11	20.68	24.73	118.53	85.32	43.03	18.96		80.61	58.21	55.49	17.11		17	12	6	2	6	11	13	11	6	7	11	13	9	7
FALSE	High	Master Protein	R4TRB9	LYS1 (Fragment) OS=Apis mellifera OX=7460 GN=lys1 PE=3 SV=1		0.006	FALSE	2.493	7	1	4	1	156	17.8	8.4					0	0														2.1					1	1
FALSE	High	Master Protein	A0A088ACI9	Lysine--tRNA ligase OS=Apis mellifera OX=7460 GN=Aats-lys PE=3 SV=1		0	FALSE	5.753	3	2	3	2	587	67.6	6.51	0	0									3.15										1	1									1
FALSE	High	Master Protein	A0A0M3S982	Lysine--tRNA ligase OS=Serratia marcescens OX=615 GN=lysS PE=3 SV=1		0	FALSE	6.456	5	2	3	2	505	57.3	5.16																				7.37
FALSE	High	Master Protein	A0A0G8BF19	LysM domain/BON superfamily protein OS=Serratia marcescens OX=615 GN=ygaU PE=4 SV=1		0	FALSE	47.243	50	6	14	6	148	15.9	5.36																				46.86
FALSE	High	Master Protein	A0A088A601	LysM domain-containing protein OS=Apis mellifera OX=7460 PE=4 SV=1		0	FALSE	10.179	3	2	3	2	1255	140.3	5.4	2.77																	2.1	0		1
FALSE	High	Master Protein	A0A088ADA3	M16C_associated domain-containing protein OS=Apis mellifera OX=7460 GN=PITRM1 PE=4 SV=1		0	FALSE	149.839	44	29	81	29	1033	119.5	6.77	57.46	0	3.61			0	0	5.35		0	36.38	29.48				10.19	17.49	14.2	3.93		16	2	3			2	3	4		1	11	10
FALSE	High	Master Protein	A0A087ZSU7	M20_dimer domain-containing protein OS=Apis mellifera OX=7460 GN=LOC408969 PE=4 SV=1		0	FALSE	31.715	24	6	10	6	401	45.3	5.44											10.85	18.34		1.82																	3	4		2
FALSE	High	Master Protein	A0A088ADU9	M20_dimer domain-containing protein OS=Apis mellifera OX=7460 GN=LOC412393 PE=4 SV=1		0	FALSE	151.777	57	19	147	19	481	54.2	6.43	55.56					42.3				28.83	80.17	41.09		12.14		48.7	27.36	16.06	37.4		13					12				11	17	13		6
FALSE	High	Master Protein	A0A088AU96	Macro domain-containing protein OS=Apis mellifera OX=7460 GN=LOC408589 PE=4 SV=1		0	FALSE	61.799	50	8	45	8	270	30.4	8.75	12.04	2.88		0		5.06					19.13	13.02		0		2.6	20.67	8.91	7.36		5	2		1		2					4	4		1
FALSE	High	Master Protein	A0A088AT64	Macro domain-containing protein OS=Apis mellifera OX=7460 PE=4 SV=1		0.002	FALSE	3.33	2	1	1	1	490	55.9	6.8		2.94																				1
FALSE	High	Master Protein	A0A087ZQU1	MADS-box domain-containing protein OS=Apis mellifera OX=7460 GN=Mef2 PE=4 SV=1		0.002	FALSE	3.659	3	1	1	1	482	51.2	7.8																	0
FALSE	High	Master Protein	Q47819	Major cold-shock protein (Fragment) OS=Enterococcus faecalis OX=1351 GN=cspA PE=4 SV=1		0	FALSE	6.643	58	2	2	2	45	5	4.35														3.24																				2
FALSE	High	Master Protein	B3GM12	Major royal jelly protein 9 OS=Apis mellifera OX=7460 GN=MRJP9 PE=2 SV=1		0.002	FALSE	3.366	3	1	1	1	422	48.5	8.53													2.11																				1
FALSE	High	Master Protein	U5J977	Malate dehydrogenase (Fragment) OS=Pectobacterium carotovorum subsp. carotovorum OX=555 GN=mdh PE=3 SV=1		0	FALSE	49.679	47	7	57	1	146	15.2	7.14	4.91			2.31	2.4	17.66			15.08		8.62			16.84	17.53					88.93	2			1	1	3			4		3			4
FALSE	High	Master Protein	A0A087ZUK9	Malate dehydrogenase OS=Apis mellifera OX=7460 GN=LOC408950 PE=3 SV=1		0	FALSE	285.992	78	24	1091	24	338	35.8	9.29	244.73	164.18	201.8	47.65	55.08	221.99	158.49	236.26	55.93	110.25	265.44	286.59	135.45	80.39	2.31	110.98	418.91	348.38	167.4		21	20	20	14	15	23	20	22	16	16	21	22	18	16
FALSE	High	Master Protein	A0A087ZYQ1	Malate dehydrogenase OS=Apis mellifera OX=7460 GN=LOC411014 PE=3 SV=1		0	FALSE	130.203	56	16	137	16	333	36.1	6.71	30.84	26.9	15.71	15.99	6.45	32.18	13.44	12.55	16.83	15.79	58.31	88.99	11.89	9.88		16.11	30.47	11.53	15.85		5	5	3	4	1	8	3	3	3	3	9	15	3	3
FALSE	High	Master Protein	A0A086FJ79	Malate dehydrogenase OS=Serratia marcescens OX=615 GN=mdh PE=3 SV=1		0	FALSE	125.451	73	18	149	12	312	32.6	6.57	23.34			4.08	24.19	29.01			45.24		24.11			39.58	38.39					152.12	5			1	6	6			9		5			6
FALSE	High	Master Protein	A0A1Q5W6A1	Malate synthase OS=Serratia marcescens OX=615 GN=A8A12_11690 PE=3 SV=1		0	FALSE	48.728	16	7	18	1	532	60.3	5.88														2.15						50.34														1
FALSE	High	Master Protein	V5YUA6	Malate synthase OS=Serratia marcescens OX=615 GN=aceB PE=3 SV=1		0	FALSE	33.135	14	7	17	1	539	61.1	5.88														2.15						40.58														1
FALSE	High	Master Protein	A0A088AES7	Malic enzyme OS=Apis mellifera OX=7460 GN=Mdh PE=3 SV=1		0	FALSE	57.452	28	11	18	11	625	69.7	7.64			2.93			7.05				5.09	4.96	22.17					0	2.74	3.85				1			3				4	1	5
FALSE	High	Master Protein	A0A088ATR6	Malic enzyme OS=Apis mellifera OX=7460 PE=3 SV=1		0	FALSE	96.841	37	16	61	16	632	70.7	7.11	32.77	4.73								2.98	37.73	38.41		2.18		3.8	17.99		1.82		11	2								1	11	12		3
FALSE	High	Master Protein	A0A093SDE5	Malic enzyme OS=Pectobacterium carotovorum subsp. carotovorum OX=555 GN=KP17_11755 PE=4 SV=1		0	FALSE	9.461	4	2	2	1	759	82.1	5.34																				6.45
FALSE	High	Master Protein	A0A1Q4NZ49	Malic enzyme OS=Serratia marcescens OX=615 GN=BHU62_12995 PE=4 SV=1		0	FALSE	18.568	8	4	5	3	759	82.4	5.44																				15.26
FALSE	High	Master Protein	A0A1X3BZT3	Manganese ABC transporter substrate-binding protein OS=Enterococcus faecalis OX=1351 GN=A6B47_09270 PE=3 SV=1		0.006	FALSE	2.568	3	1	1	1	308	34.8	5.52														2.17																				1
FALSE	High	Master Protein	Q6R6H8	Mannose sensitive type I fimbriae major structural subunit OS=Serratia marcescens OX=615 GN=safA PE=4 SV=1		0	FALSE	22.474	20	3	9	1	232	23.8	7.72									5.28						2.25					21.7									2
FALSE	High	Master Protein	A0A1Q5WDQ7	Mannose-1-phosphate guanylyltransferase/mannose-6-phosphate isomerase OS=Serratia marcescens OX=615 GN=A8A12_08340 PE=3 SV=1		0.006	FALSE	2.597	2	1	2	1	474	52.9	5.68																				4.02
FALSE	High	Master Protein	A0A087ZXG9	MARVEL domain-containing protein OS=Apis mellifera OX=7460 GN=100577682 PE=4 SV=1		0	FALSE	4.945	8	1	5	1	168	19.2	9.17		3.76	3.28	2.97	4.02									2.83								1	1	1	1									1
FALSE	High	Master Protein	A0A087ZPM2	Mast cell degranulating peptide OS=Apis mellifera OX=7460 GN=Mcdp PE=4 SV=1		0	FALSE	11.038	20	2	66	2	50	5.8	9.77				0	1.79	0	0		0	23.4	0	0	0		0									1	1	1	1		1	2	1	1	1
FALSE	High	Master Protein	A0A088AFE8	Matrin-type domain-containing protein OS=Apis mellifera OX=7460 GN=SF3A3 PE=4 SV=1		0	FALSE	8.452	4	1	10	1	501	58.3	5.41	2.14	4.93	0		0		2.28	0		2.07											1	1	1		1		1	1		1
FALSE	High	Master Protein	A0A088A676	Maxi-like antifreeze protein OS=Apis mellifera OX=7460 GN=102654146 PE=2 SV=1		0	FALSE	186.544	73	14	80	14	364	37	6.64			0	4.55		30.54	0	277.36		2.5	0		0										1	2		8	1	14		2	1		1
FALSE	High	Master Protein	A0A088AW52	MCU domain-containing protein OS=Apis mellifera OX=7460 PE=4 SV=1		0	FALSE	20.544	18	4	19	4	339	39.2	7.01			3.13	2.27	5.07	2.39	8.42	2.74	2.46	5.24		0	9.55										1	1	2	1	2	1	1	1		1	2
FALSE	High	Master Protein	P01501	Melittin OS=Apis mellifera OX=7460 GN=MELT PE=1 SV=1		0	FALSE	95.164	23	3	419	3	70	7.6	4.72	9.89	7.1		37.91	40.23	19.53	20.99		27.02	670.11	82.61	11.93	118.84	21.59	79.91		15.55		3.79		1	1		2	2	2	2		2	3	2	2	2	2
FALSE	High	Master Protein	P0DPR9	Melittin-N OS=Apis cerana OX=7461 GN=MELT PE=1 SV=1		0	FALSE	26.726	21	2	32	2	70	7.6	4.72	4.43			7.97		17.73			24.73					15.42					13.01		1			2		2			2					2
FALSE	High	Master Protein	A0A1L6QKF3	Membrane protein insertase YidC OS=Serratia marcescens OX=615 GN=yidC PE=3 SV=1		0.001	FALSE	3.889	2	1	1	1	545	61.1	7.99																				2.46
FALSE	High	Master Protein	A0A093VDD5	Membrane protein OS=Pectobacterium carotovorum subsp. carotovorum OX=555 GN=KP17_00765 PE=3 SV=1		0	FALSE	41.926	18	8	100	4	366	39	8.53	10.2			2.18	12.15	11.02		1.71	20.69	3.84	12.03			48.46	26.27		16.07	19.26		54.45	3			2	3	3		1	4	2	2			7
FALSE	High	Master Protein	A0A093VEE9	Membrane protein OS=Pectobacterium carotovorum subsp. carotovorum OX=555 GN=KP17_02700 PE=4 SV=1		0.009	FALSE	2.311	6	1	3	1	155	15.5	9.72									2.34					2.17						2.48									1					1
FALSE	High	Master Protein	A0A088AII8	Methionine aminopeptidase 2 OS=Apis mellifera OX=7460 GN=Metap2 PE=3 SV=1		0	FALSE	9.071	7	3	5	3	474	52.5	5.99		2.23								2.25	2.19	0						2.29				1								1	1	1
FALSE	High	Master Protein	A0A088AK91	Methionine aminopeptidase OS=Apis mellifera OX=7460 GN=LOC410385 PE=3 SV=1		0	FALSE	6.909	3	1	1	1	377	42.3	7.2											2.79																				1
FALSE	High	Master Protein	A0A1Q4NW74	Methionine aminopeptidase OS=Serratia marcescens OX=615 GN=map PE=3 SV=1		0	FALSE	6.196	9	2	2	2	264	29.3	5.8																				4.69
FALSE	High	Master Protein	A0A093SW78	Methionine--tRNA ligase OS=Pectobacterium carotovorum subsp. carotovorum OX=555 GN=metG PE=3 SV=1		0	FALSE	15.045	7	4	14	2	676	75.7	5.72	5.34	1.86	3.69	0		1.92			1.76											12.73	1	1	1	1		1			1
FALSE	High	Master Protein	A0A0G3SNN4	Methionine--tRNA ligase OS=Serratia marcescens OX=615 GN=metG PE=3 SV=1		0	FALSE	18.736	6	3	5	1	675	75.7	5.64																				14.67
FALSE	High	Master Protein	A0A0P0QCU8	Methyl-galactoside ABC transporter substrate-binding protein OS=Serratia marcescens OX=615 GN=AR325_10035 PE=4 SV=1		0.002	FALSE	3.104	4	1	1	1	330	35.7	6.6																				2.71
FALSE	High	Master Protein	A0A1Q5VY88	Methylmalonate-semialdehyde dehydrogenase (Acylating) OS=Serratia marcescens OX=615 GN=A8A12_18835 PE=4 SV=1		0	FALSE	13.177	11	3	3	3	501	53.6	6.42																				12.46
FALSE	High	Master Protein	A0A0U6TCD9	Methylmalonate-semialdehyde dehydrogenase [acylating] OS=Serratia marcescens OX=615 GN=mmsA_1 PE=4 SV=1		0.004	FALSE	2.764	2	1	1	1	500	53.4	6.42																				2.16
FALSE	High	Master Protein	A0A087ZPE3	MFS domain-containing protein OS=Apis mellifera OX=7460 GN=102653922 PE=4 SV=1		0	FALSE	9.539	3	1	1	1	568	63.1	7.27																			3.65
FALSE	High	Master Protein	A0A087ZX92	MFS domain-containing protein OS=Apis mellifera OX=7460 GN=107965219 PE=4 SV=1		0	FALSE	9.936	7	2	2	2	480	54.1	7.05								5.96																				2
FALSE	High	Master Protein	A0A087ZS22	MFS domain-containing protein OS=Apis mellifera OX=7460 GN=LOC408478 PE=3 SV=1		0	FALSE	10.371	5	3	6	3	545	60.7	9.22						0							1.64			1.91	3.29	3.73								1							1
FALSE	High	Master Protein	A0A088ART6	MFS domain-containing protein OS=Apis mellifera OX=7460 GN=LOC409424 PE=3 SV=1		0	FALSE	5.991	3	1	2	1	487	53.3	9.09																0		2.65
FALSE	High	Master Protein	A0A087ZS87	MFS domain-containing protein OS=Apis mellifera OX=7460 GN=LOC410566 PE=4 SV=1		0.001	FALSE	3.936	2	1	1	1	498	55.7	7.83													0																				1
FALSE	High	Master Protein	A0A088A6U6	MFS domain-containing protein OS=Apis mellifera OX=7460 GN=LOC410920 PE=4 SV=1		0	FALSE	8.668	6	2	2	2	508	56.2	8.21						3.17							2.56													1							1
FALSE	High	Master Protein	A0A088A3V4	MFS domain-containing protein OS=Apis mellifera OX=7460 GN=LOC412056 PE=4 SV=1		0.007	FALSE	2.428	1	1	2	1	543	60.6	8.44			0					0															1					1
FALSE	High	Master Protein	A0A088ABY6	MFS domain-containing protein OS=Apis mellifera OX=7460 GN=LOC413575 PE=3 SV=1		0	FALSE	21.002	11	3	12	3	538	58.4	6.55	2.58					7.41	3.1	1.85					2.4		0		2.88	8.88		2.13	1					2	1	1					1
FALSE	High	Master Protein	A0A087ZQS9	MFS domain-containing protein OS=Apis mellifera OX=7460 GN=LOC413739 PE=4 SV=1		0.002	FALSE	3.116	2	1	2	1	546	60.6	7.68								0	0																			1	1
FALSE	High	Master Protein	A0A088A8N0	MFS domain-containing protein OS=Apis mellifera OX=7460 GN=LOC724874 PE=3 SV=1		0	FALSE	137.52	37	12	236	12	514	57.9	8.72	32.21		49.4		37.01	134.45			6	15.93			121.21	5.94	65.83	4.11	10.74	4.09		129.4	6		8		5	7			4	6			9	2
FALSE	High	Master Protein	A0A087ZWI3	MFS domain-containing protein OS=Apis mellifera OX=7460 GN=Picot PE=4 SV=1		0	FALSE	5.595	3	2	3	2	525	58	7.28						2.6							4.01													1							2
FALSE	High	Master Protein	A0A087ZQD7	MFS domain-containing protein OS=Apis mellifera OX=7460 PE=3 SV=1		0	FALSE	5.075	1	1	4	1	784	87.1	7.34			2.09						0				1.8	0									1						1				1	1
FALSE	High	Master Protein	A0A087ZYT1	MFS domain-containing protein OS=Apis mellifera OX=7460 PE=3 SV=1		0	FALSE	11.755	5	2	9	2	460	50.9	7.88			7.11					0	4.25					0									2					1	1					1
FALSE	High	Master Protein	A0A087ZQT0	MFS domain-containing protein OS=Apis mellifera OX=7460 PE=4 SV=1		0	FALSE	19.998	13	3	24	3	355	39.8	5.34			14.12		0			13.4	13.83					15.61	2.34			1.71		5.98			2		1			2	2					3
FALSE	High	Master Protein	A0A088A3S5	MFS domain-containing protein OS=Apis mellifera OX=7460 PE=4 SV=1		0.002	FALSE	3.229	2	1	2	1	538	60.8	7.99		0					2.57															1					1
FALSE	High	Master Protein	A0A088A5U8	MFS domain-containing protein OS=Apis mellifera OX=7460 PE=4 SV=1		0	FALSE	25.387	14	5	11	5	798	86.5	5.78	3.25	2.98				2.54	5.47	0					3.02				3.65	2.21			1	2				1	2	1					1
FALSE	High	Master Protein	A0A088AMH1	MFS domain-containing protein OS=Apis mellifera OX=7460 PE=4 SV=1		0.004	FALSE	2.745	2	1	1	1	671	72.7	6.48							0																				1
FALSE	High	Master Protein	A0A088A4M6	MFS_1_like domain-containing protein OS=Apis mellifera OX=7460 GN=LOC410041 PE=4 SV=1		0	FALSE	14.653	6	3	10	3	710	79.3	6.83	2.26	2.87	3.01		2.31		3.71			0	0		2.52				2.17	2.05			1	1	1		1		1			1	1		1
FALSE	High	Master Protein	A0A088A0U4	MGS domain-containing protein OS=Apis mellifera OX=7460 GN=LOC412467 PE=3 SV=1		0	FALSE	43.159	22	10	16	10	593	65.7	8.19	7.53										12.08		1.82			5.66	3.46		1.61		3										4		1
FALSE	High	Master Protein	A0A088A9E6	MHD domain-containing protein OS=Apis mellifera OX=7460 GN=AP-50 PE=3 SV=1		0	FALSE	18.711	14	4	8	4	442	49.9	9.45	7.12	1.83	3.87				4.67						4.42	0							2	1	1				1						1	1
FALSE	High	Master Protein	A0A088A2H6	MHD domain-containing protein OS=Apis mellifera OX=7460 GN=LOC552520 PE=3 SV=1		0.006	FALSE	2.618	2	1	1	1	417	47.2	7.2											0																				1
FALSE	High	Master Protein	A0A088AG05	MICOS complex subunit MIC13 OS=Apis mellifera OX=7460 GN=725253 PE=3 SV=1		0	FALSE	37.055	61	4	101	4	114	12.9	9.28	18.2	33.06	20.23	21.71	18.63	13.34	22.97	20.7	11.96	8.13	11.37	10.79	15.9	11.13	5.49	3.05	1.93				3	3	3	3	3	3	3	3	3	3	2	3	3	3
FALSE	High	Master Protein	A0A088ASI2	MICOS complex subunit MIC60 OS=Apis mellifera OX=7460 GN=LOC408548 PE=3 SV=1		0	FALSE	290.237	54	34	603	34	752	86.1	7.78	126.97	111.79	90.56	64.5	89.25	70.24	131.45	90.33	66.92	64.22	89.9	99.38	108.89	47.74	42.85	77.44	137	137.11	39.02	12.39	28	20	24	20	19	17	26	20	18	15	19	20	21	14
FALSE	High	Master Protein	A0A088A8C1	MICOS complex subunit OS=Apis mellifera OX=7460 GN=LOC552009 PE=4 SV=1		0	FALSE	103.917	64	13	318	13	245	27.5	8.38	78.15	69.75	65.29	55.77	62.51	58.92	70.56	59.65	35.46	29.19	61.91	46.85	46.59	32.22	24.33	40.53	50.94	22.75	13.35	1.95	9	9	9	9	10	9	10	11	8	7	9	7	8	6
FALSE	High	Master Protein	A0A088AIN2	Microtubule-associated protein OS=Apis mellifera OX=7460 PE=4 SV=1		0	FALSE	13.693	13	3	4	3	290	31.2	9.95		0					2.44				5.59											1					1				2
FALSE	High	Master Protein	A0A088A145	MIF4G domain-containing protein OS=Apis mellifera OX=7460 GN=Cbp80 PE=4 SV=1		0.002	FALSE	3.647	2	1	1	1	794	92.9	6.6	0																				1
FALSE	High	Master Protein	A0A088A4V0	Mitochondrial fission 1 protein OS=Apis mellifera OX=7460 GN=LOC551255 PE=3 SV=1		0	FALSE	26.068	51	6	37	6	150	17.1	7.84	10.97	4.78	4.86	7.55	2.37	2.77	8.92	9.31	7.81		3.01	9.5	8.7	6.66	2.28	0					5	2	2	2	2	1	3	3	3		1	3	3	2
FALSE	High	Master Protein	A0A088A218	Mitochondrial import inner membrane translocase subunit TIM44 OS=Apis mellifera OX=7460 GN=LOC412409 PE=3 SV=1		0	FALSE	55.787	34	12	65	12	456	52.2	8.44	19.01	6.94	16.21	6.64	4.84	7.38	7.36	10.79	4.47	3.1	13.52	9.02	6.64	5.82	0	1.95	9.45	9.92	4.17		4	2	5	3	3	2	1	3	2	1	4	2	1	3
FALSE	High	Master Protein	A0A088AJ70	Mitochondrial import inner membrane translocase subunit TIM50 OS=Apis mellifera OX=7460 GN=LOC408569 PE=3 SV=1		0	FALSE	40.545	33	9	63	9	387	45.5	6.81	5.12	7.44	8.61	1.94	8.98	7.59	9.04	4.17	7.76	4.58	6.67	2.99	10.62	5.14	0	4.41	10.79	7.08	3.77	2.68	2	2	3	4	4	4	4	3	4	2	3	1	4	3
FALSE	High	Master Protein	A0A088AN56	Mitochondrial pyruvate carrier OS=Apis mellifera OX=7460 GN=LOC411677 PE=3 SV=1		0	FALSE	24.943	47	2	14	2	103	12.1	9.8	6.18	3.38	5.61	6.9	2.13				5.73	9.7											2	1	1	2	1				2	1
FALSE	High	Master Protein	A0A088A1R9	Mitochondrial Rho GTPase OS=Apis mellifera OX=7460 PE=3 SV=1		0	FALSE	13.531	6	3	5	3	650	74.3	6.68							2.79					2.82					2.42										2					2
FALSE	High	Master Protein	A0A087ZVK5	ML domain-containing protein OS=Apis mellifera OX=7460 GN=LOC551922 PE=4 SV=1		0.002	FALSE	3.55	8	1	4	1	152	17	6.73						2.15					2.17	2.45		0												1					1	1		1
FALSE	High	Master Protein	A0A087ZTA5	ML domain-containing protein OS=Apis mellifera OX=7460 GN=LOC724386 PE=4 SV=1		0	FALSE	67.96	34	3	79	3	148	16.1	7.62	7.27		4.94	2.05	2.64	21.6		5.07	20.38	4.41	62.49		2.87	53.98	11.72	6.3	2.92	3.05	5.24	18.73	2		2	1	1	3		2	3	2	3		1	3
FALSE	High	Master Protein	A0A088A045	ML domain-containing protein OS=Apis mellifera OX=7460 PE=4 SV=1		0	FALSE	31.808	47	5	49	5	154	16.8	6.51	18.36	7.1			0	12.95			3.86		2.21	6.51		4	0	2.81	0	0	2.05		5	1			1	3			2		2	3		2
FALSE	High	Master Protein	A0A221HD07	Molecular chaperone OS=Serratia marcescens OX=615 GN=BVG84_16805 PE=3 SV=1		0	FALSE	10.64	14	2	6	2	176	19.5	9.44																				14.02
FALSE	High	Master Protein	A0A1Q5W437	Molecular chaperone OsmY OS=Serratia marcescens OX=615 GN=A8A12_13755 PE=4 SV=1		0	FALSE	12.087	14	2	4	2	204	21.2	8.21																				13.37
FALSE	High	Master Protein	A0A088ASG4	Molybdopterin molybdenumtransferase OS=Apis mellifera OX=7460 PE=3 SV=1		0	FALSE	7.838	6	3	5	3	510	55.8	8.28	0										0	2.02									1										2	2
FALSE	High	Master Protein	A0A087ZUN0	MOSC domain-containing protein OS=Apis mellifera OX=7460 GN=100577026 PE=4 SV=1		0	FALSE	98.582	44	17	189	17	415	47.6	5.88	61.76	54.39	22.48	32.31	26.91	22.21	64.15	19.46	12.3		40.14	27.01	28.87	1.72	2.17	4.98	7.73	2.42			13	12	5	9	8	6	14	5	4		9	9	6	2
FALSE	High	Master Protein	A0A088AV56	MOSC domain-containing protein OS=Apis mellifera OX=7460 GN=LOC724919 PE=4 SV=1		0	FALSE	67.396	41	11	100	11	343	38.8	9.19	7.68	5.32	16.96	9.32	4.57	1.87	9.65	32.06	33.52		6.61	4.53	13.03	14.91	4.38	3.83	5.67	10.89	3.79	16.06	4	3	7	3	2	2	4	8	9		4	3	5	5
FALSE	High	Master Protein	A0A088AGS6	MPN domain-containing protein OS=Apis mellifera OX=7460 GN=LOC408413 PE=4 SV=1		0	FALSE	70.371	42	8	54	8	320	36.4	6.48	9.49	14.98	11.87		3.68	16.39	16.38	11.16	3.27	13.82	17.7	22.17	15.24	2.73	2.54	2.44	13.94	8.03	6.14		2	3	3		1	3	3	2	1	1	3	2	2	1
FALSE	High	Master Protein	A0A088A3I1	MPN domain-containing protein OS=Apis mellifera OX=7460 GN=LOC551620 PE=4 SV=1		0	FALSE	14.819	3	4	13	4	2374	277	8.88	0	0	0		0		2.45	0		2.15		4.32	2.45								1	1	1		1		2	1		1		2	2
FALSE	High	Master Protein	A0A088ATF1	MPN domain-containing protein OS=Apis mellifera OX=7460 GN=LOC552372 PE=4 SV=1		0	FALSE	6.752	12	2	6	2	207	23.5	6.15	2.77	2.7	2.75			2.8	2.1										2.9				1	1	1			1	1
FALSE	High	Master Protein	A0A087ZR05	MPN domain-containing protein OS=Apis mellifera OX=7460 GN=Rpn11 PE=4 SV=1		0	FALSE	45.949	50	9	50	9	311	34.6	6.29	13.22	4.22	3.75			10.85	12.98	4.39			16.07	10.68	9.87	2.61		5.01	6.98	0	0		5	2	1			6	5	3			6	3	4	1
FALSE	High	Master Protein	A0A088A8N1	MRP-S23 domain-containing protein OS=Apis mellifera OX=7460 PE=4 SV=1		0	FALSE	11.756	27	3	13	3	144	17.2	9.22	7.17	8.96	2.27			4.14	3.89				4.14	3.93	3.55				1.7		0		2	2	1			1	1				1	1	1
FALSE	High	Master Protein	A0A088A3M3	MRP-S28 domain-containing protein OS=Apis mellifera OX=7460 GN=mRpS35 PE=4 SV=1		0	FALSE	13.638	11	3	27	3	323	37.8	9.32	10.35	4.5	2.54	0	4.8	2.06	8.38	6.37	2.34		5.01	7.87	5.54				2.41	0			3	2	1	1	2	1	2	1	1		1	2	2
FALSE	High	Master Protein	A0A087ZQD5	MSP domain-containing protein OS=Apis mellifera OX=7460 GN=Vapa PE=4 SV=1		0	FALSE	86.022	44	8	206	8	249	28.1	7.84	32.11	35.18	16.26	13.22	8.83	15.64	44.28	10.92	7.63	4.85	26.95	31.08	33.52	0	2.2	11.62	40.4	30.15	19.1		7	7	4	6	4	5	8	5	3	2	8	6	7	2
FALSE	High	Master Protein	Q7WSD6	Multidrug efflux pump SdeX OS=Serratia marcescens OX=615 GN=sdeX PE=3 SV=1		0	FALSE	7.097	7	2	3	2	393	41.9	9.14															2.81					6.4
FALSE	High	Master Protein	A0A088A1I8	Multifunctional fusion protein OS=Apis mellifera OX=7460 GN=LOC551113 PE=3 SV=1		0	FALSE	276.996	63	36	701	36	567	63.5	8.32	214.58	72.57	79.02	8.22	20.57	56.55	123.55	73.28	11.88	18.53	140.7	152.14	67.25	40.13		107.08	152.72	128.92	59.23	2.42	31	18	17	4	9	16	26	21	6	7	23	26	19	16
FALSE	High	Master Protein	A0A0U5MCW9	Multiple antibiotic resistance protein marA OS=Serratia marcescens OX=615 GN=marA_1 PE=4 SV=1		0.01	FALSE	2.139	7	1	11	1	320	35.6	8.73	0	2.52	0		0	0	0						0								1	1	1		1	1	1						1
FALSE	High	Master Protein	A0A093RDD7	Murein lipoprotein OS=Pectobacterium carotovorum subsp. carotovorum OX=555 GN=KP17_02980 PE=4 SV=1		0	FALSE	28.187	33	2	59	1	78	8.4	9.31	6.79	3.72	7.54	8.89	20.07	6.95			9.6	7.34	6.44			20.54	17.67	2.38		10.5	8.04	57.53	1	1	1	1	2	1			2	1	1			2
FALSE	High	Master Protein	A0A080UXV1	Murein-lipoprotein OS=Serratia marcescens OX=615 GN=lpp PE=4 SV=1		0	FALSE	38.64	33	2	84	1	78	8.3	8.84	15.73	3.72	7.54	15.82	22.1	18.27			13.28	7.34	13.23			31.74	21.91	2.38		10.5	8.23	64.31	2	1	1	2	2	2			2	1	2			2
FALSE	High	Master Protein	A0A088AJT3	Myb_DNA-bind_5 domain-containing protein OS=Apis mellifera OX=7460 PE=4 SV=1		0	FALSE	55.113	8	2	47	2	439	50.8	8.29	13.68	17.18				34.84	7.41	16.92			43.18	21.85					26.92	2.62	6.16		1	2				2	1	2			2	2
FALSE	High	Master Protein	A0A088AGS8	Myosin motor domain-containing protein OS=Apis mellifera OX=7460 PE=3 SV=1		0	FALSE	6.807	1	1	1	1	1582	183.1	8.69		2.61																				1
FALSE	High	Master Protein	A0A088AJE3	Myosin motor domain-containing protein OS=Apis mellifera OX=7460 PE=3 SV=1		0	FALSE	2547.29	62	159	9807	159	1967	226.4	5.55	1180.46	1559.38	1734.16	1581.35	1555.06	1148.28	1780.87	1969.43	1415.24	2912.6	933.82	1350.51	1532.93	600.91	989.32	772.91	2844.59	2761.2	1632.1	449.17	120	128	134	133	121	117	136	144	126	152	104	124	130	93
FALSE	High	Master Protein	A0A087ZW19	Myosin_tail_1 domain-containing protein OS=Apis mellifera OX=7460 PE=4 SV=1		0	FALSE	541.773	62	41	1651	41	541	63.5	5.36	227.35	247.23	256.32	203.36	196.95	309.84	283.39	328.39	158.07	530.67	190.5	233.41	198.55	150.94	134.89	244.95	445.17	549.45	165.45	57.86	30	31	34	28	27	34	30	36	25	40	26	27	27	27
FALSE	High	Master Protein	A0A087ZW20	Myosin_tail_1 domain-containing protein OS=Apis mellifera OX=7460 PE=4 SV=1		0	FALSE	398.841	36	27	964	27	639	74.5	7.23	135.18	160.65	179.13	155.68	142.9	215.96	187.66	217.56	136.45	244.98	135.6	122.33	114.94	109.57	84.01	236.63	296.74	381.43	158	30.92	17	19	19	18	18	21	19	21	17	23	17	17	15	17
FALSE	High	Master Protein	A0A088AVZ2	Myosin_tail_1 domain-containing protein OS=Apis mellifera OX=7460 PE=4 SV=1		0	FALSE	6.976	2	2	7	1	942	107.9	5.3	0	3.48					1.88					1.77	1.21				2.52				1	1					1					1	1
FALSE	High	Master Protein	A0A088ABQ1	Myosin-VI_CBD domain-containing protein OS=Apis mellifera OX=7460 PE=4 SV=1		0	FALSE	6.359	6	1	16	1	201	23.6	9.28	4.77	2.38	0	0		0	6.65	0				0	2.13								1	1	1	1		1	1	1				1	1
FALSE	High	Master Protein	A0A221FKH1	Na(+)-translocating NADH-quinone reductase subunit A OS=Serratia marcescens OX=615 GN=nqrA PE=3 SV=1		0	FALSE	4.633	3	1	1	1	449	48.3	6.39																				3.31
FALSE	High	Master Protein	A0A1C3H953	Na(+)-translocating NADH-quinone reductase subunit C OS=Serratia marcescens OX=615 GN=nqrC PE=3 SV=1		0.002	FALSE	3.13	5	1	1	1	264	28.4	6.38																				2.67
FALSE	High	Master Protein	A0A1Q4P4A9	Na(+)-translocating NADH-quinone reductase subunit F OS=Serratia marcescens OX=615 GN=nqrF PE=3 SV=1		0.004	FALSE	2.783	3	1	1	1	407	45.3	5.01														1.79																				1
FALSE	High	Master Protein	A0A088ATG2	Na_H_Exchanger domain-containing protein OS=Apis mellifera OX=7460 PE=4 SV=1		0	FALSE	84.169	23	9	65	9	496	53.8	7.09	15.22		11.65	18.61		15.25			15.5		17.79		9.93			12.56	2.67		52.26		4		3	4		5			4		4		3
FALSE	High	Master Protein	A0A088AUC4	NAC-A/B domain-containing protein OS=Apis mellifera OX=7460 GN=LOC551157 PE=4 SV=1		0	FALSE	47.172	38	6	51	6	214	22.7	4.81	11.91	14.19	3.37		3.09	8.59	11.46	3.16		9.08	18.69	20.18	11.59		2.62		5.63	6.13	4.94		4	4	1		1	3	3	2		3	6	6	4
FALSE	High	Master Protein	A0A0B4J2M4	N-acetylglucosamine-6-phosphate deacetylase OS=Apis mellifera OX=7460 PE=3 SV=1		0	FALSE	10.031	4	1	1	1	405	44.5	7.69												4.01																				1
FALSE	High	Master Protein	A0A088AAB4	N-acetyltransferase domain-containing protein OS=Apis mellifera OX=7460 GN=LOC724486 PE=4 SV=1		0.009	FALSE	2.248	5	1	1	1	168	19.5	8.5																			0
FALSE	High	Master Protein	A0A093STA8	NAD(P) transhydrogenase subunit alpha OS=Pectobacterium carotovorum subsp. carotovorum OX=555 GN=pntA PE=3 SV=1		0	FALSE	5.329	3	1	1	1	509	54.5	5.83									2.36																				1
FALSE	High	Master Protein	A0A0U6GD80	NAD(P) transhydrogenase subunit beta OS=Serratia marcescens OX=615 GN=pntB PE=3 SV=1		0	FALSE	6.505	6	2	2	2	464	49	5.66									0						2.97														1
FALSE	High	Master Protein	A0A088A0I0	NAD(P)-bd_dom domain-containing protein OS=Apis mellifera OX=7460 GN=LOC412445 PE=4 SV=1		0	FALSE	48.787	49	7	39	7	201	22.2	8.25	7.24	3.73	7.85	3.39	3.7	12.25	4.98	4.2	3.69	7.04	25.89	14.04	11.59	17.79	2.29	0	3.06	3.77	5.09		2	1	2	1	1	2	1	1	1	2	4	3	2	4
FALSE	High	Master Protein	A0A088A9V8	NAD(P)-bd_dom domain-containing protein OS=Apis mellifera OX=7460 PE=3 SV=1		0	FALSE	14.091	12	3	3	3	356	40.3	6.86											3.96	2.09							0												1	1
FALSE	High	Master Protein	A0A0A5LSR2	NAD(P)H dehydrogenase (quinone) OS=Serratia marcescens OX=615 GN=wrbA_2 PE=3 SV=1		0	FALSE	8.16	10	2	5	2	199	21.1	7.21																				12.25
FALSE	High	Master Protein	A0A088ADJ5	NAD(P)H-hydrate epimerase OS=Apis mellifera OX=7460 GN=LOC727471 PE=3 SV=1		0	FALSE	8.716	12	2	2	2	234	26.5	7.33												6.08																				2
FALSE	High	Master Protein	A0A087ZRH1	NAD_Gly3P_dh_N domain-containing protein OS=Apis mellifera OX=7460 PE=4 SV=1		0	FALSE	4.551	17	1	3	1	78	8.8	9.16											3.1	3.96				0															1	1
FALSE	High	Master Protein	A0A1Q4P6R7	NAD-dependent malic enzyme OS=Serratia marcescens OX=615 GN=maeA PE=3 SV=1		0.006	FALSE	2.539	3	1	1	1	565	62.7	5.38																				2.57
FALSE	High	Master Protein	A0A0P0QBJ5	NAD-dependent phenylacetaldehyde dehydrogenase OS=Serratia marcescens OX=615 GN=AR325_06960 PE=3 SV=1		0	FALSE	26.157	17	5	5	5	499	53.5	6.09																				15.27
FALSE	High	Master Protein	A0A221FPZ8	NAD-dependent succinate-semialdehyde dehydrogenase OS=Serratia marcescens OX=615 GN=BVG93_09700 PE=4 SV=1		0	FALSE	11.721	10	3	3	3	477	50.7	6.48																				6.83
FALSE	High	Master Protein	A0A087ZP22	NADH dehydrogenase [ubiquinone] 1 alpha subcomplex subunit 10, mitochondrial OS=Apis mellifera OX=7460 GN=Ndufa10 PE=3 SV=1		0	FALSE	171.381	67	25	418	25	415	49.2	7.11	78.17	68.26	73.2	45.07	65.02	35.43	74.3	63.9	27.14	42.96	59.82	57.53	34.93	26.53	9.34	39.92	45.57	37.9	11.27	4.8	19	18	18	13	17	13	17	17	13	15	16	19	13	11
FALSE	High	Master Protein	A0A087ZQU2	NADH dehydrogenase [ubiquinone] 1 alpha subcomplex subunit 8 OS=Apis mellifera OX=7460 GN=Ndufa8 PE=3 SV=1		0	FALSE	59.642	56	8	164	8	174	20.2	8.05	26.76	27.03	14.79	11.27	14.52	14.54	38.34	19.51	15.55	22.39	24.84	22.82	14.5	2.65	7.67	11.25	26.12	15.79	2.2		7	6	4	6	6	6	6	6	5	6	4	5	5	2
FALSE	High	Master Protein	A0A088A1P8	NADH dehydrogenase [ubiquinone] flavoprotein 1, mitochondrial OS=Apis mellifera OX=7460 PE=3 SV=1		0	FALSE	213.406	72	23	486	23	469	51.5	8.34	149.18	129.1	97.54	77.36	91.91	58.3	126.4	80.83	41.07	50.54	110.73	108.2	73.52	37.5	36.26	55.66	36.59	30.77	19.13	3.14	17	19	17	17	16	12	16	14	12	11	16	17	12	9
FALSE	High	Master Protein	V5T7I1	NADH dehydrogenase FAD-containing subunit OS=Lactobacillus mellis OX=1218508 GN=JG29_15760 PE=4 SV=1		0	FALSE	4.462	12	2	2	2	395	43.1	7.02								4.96																				2
FALSE	High	Master Protein	A0A343TB61	NADH dehydrogenase subunit 2 OS=Apis mellifera capensis OX=293692 GN=ND2 PE=4 SV=1		0	FALSE	5.047	3	1	2	1	333	40.9	9.58	4.45																				1
FALSE	High	Master Protein	A0A1X9WE15	NADH dehydrogenase subunit 6 OS=Apis mellifera meda OX=346612 GN=ND6 PE=4 SV=1		0.002	FALSE	3.133	7	1	2	1	167	20	9.76		2.13			0																	1			1
FALSE	High	Master Protein	A0A088AB11	NADH-cytochrome b5 reductase OS=Apis mellifera OX=7460 GN=LOC413189 PE=3 SV=1		0	FALSE	150.953	52	17	377	17	308	34.6	8.9	80.59	93.42	63.64	53.93	62.49	39	93.96	59.59	37.78	70.27	60.06	67.64	62.67	27.2	34.23	18.62	57.39	45.98	24.19	10.43	14	13	10	10	9	9	12	7	8	10	9	8	12	7
FALSE	High	Master Protein	A0A093SPC2	NADH-quinone oxidoreductase subunit C/D OS=Pectobacterium carotovorum subsp. carotovorum OX=555 GN=nuoC PE=3 SV=1		0	FALSE	4.614	2	1	1	1	599	68.9	6.21																				3.16
FALSE	High	Master Protein	A0A060B9T4	NADH-ubiquinone oxidoreductase chain 1 OS=Apis mellifera scutellata OX=212527 GN=ND1 PE=3 SV=1		0	FALSE	10.431	5	1	22	1	305	36.7	6.54	5.73	4.46	2.13		2.1		0				2.72	7.21	4.85	4.14							1	1	1		1		1				1	1	1	1
FALSE	High	Master Protein	A0A0B5HAU7	NADH-ubiquinone oxidoreductase chain 3 OS=Apis mellifera syriaca OX=279977 GN=ND3 PE=3 SV=1		0	FALSE	11.243	11	1	49	1	117	14	8.1	11.29	8.55	5.91	6.77	8.28	7.76	10.49	6.51	7.54	2.89	8.08	7.65	8.1	5.57	4.99	2.08	5.08				1	1	1	1	1	1	1	1	1	1	1	1	1	1
FALSE	High	Master Protein	A0A0U1XI60	NADH-ubiquinone oxidoreductase chain 4 OS=Apis mellifera intermissa OX=346610 GN=ND4 PE=3 SV=1		0	FALSE	9.301	6	2	2	2	445	52.7	8.94		4.1															1.74					1
FALSE	High	Master Protein	A0A221DQA5	NADP-dependent 3-hydroxy acid dehydrogenase OS=Serratia marcescens OX=615 GN=BVG97_08700 PE=3 SV=1		0	FALSE	7.483	7	1	1	1	249	27	6.3																				3.86
FALSE	High	Master Protein	A0A088AJJ2	NADPH--cytochrome P450 reductase OS=Apis mellifera OX=7460 PE=4 SV=1		0	FALSE	87.828	39	16	150	16	523	60.3	7.05	16.6	44.18	31.48	1.74	2.12	7.36	29.89	23	7.01	16.05	18.83	14.39	22.95	3	1.67	6.64	22.32	22.69	19.69		7	14	11	2	1	3	8	8	2	4	6	2	8	1
FALSE	High	Master Protein	A0A1Q5W6Y3	NADPH-dependent 7-cyano-7-deazaguanine reductase OS=Serratia marcescens OX=615 GN=queF PE=3 SV=1		0	FALSE	7.548	4	1	4	1	279	31.6	5.88																				0
FALSE	High	Master Protein	V5T6Q6	NADPH-dependent FMN reductase OS=Lactobacillus kimbladii OX=1218506 GN=JF75_02910 PE=4 SV=1		0	FALSE	60.327	77	9	45	9	182	20	5.15	3.16		36.51		3.8			2.07	10.45						15.2			19.3		14.69	1		7		1			1	3
FALSE	High	Master Protein	A0A088AD09	Ncstrn_small domain-containing protein OS=Apis mellifera OX=7460 GN=nct PE=4 SV=1		0	FALSE	4.783	3	1	9	1	642	72.1	6.04	2.56	2.21	0		0	0	2.03					2.23									1	1	1		1	1	1					1
FALSE	High	Master Protein	A0A087ZNN1	Neutral ceramidase OS=Apis mellifera OX=7460 PE=3 SV=1		0	FALSE	13.431	9	2	2	2	349	38.6	7.58						3.84			2.39																	1			1
FALSE	High	Master Protein	A0A087ZNN2	Neutral ceramidase OS=Apis mellifera OX=7460 PE=3 SV=1		0	FALSE	33.55	28	6	17	6	359	40.2	5.9			1.92	4.36	1.75	19.85	2.47		3.18				2.09	2.18									2	2	1	5	1		1				1	2
FALSE	High	Master Protein	A0A088A2E5	Nfu_N domain-containing protein OS=Apis mellifera OX=7460 GN=LOC412366 PE=4 SV=1		0	FALSE	9.432	11	2	12	2	275	31.2	5.44	4.86	2.29				2.58					5.02	5.42				2.2	2.02				2	1				2					2	2
FALSE	High	Master Protein	A0A087ZYD4	Nicalin OS=Apis mellifera OX=7460 GN=Ncln PE=3 SV=1		0	FALSE	6.325	4	2	2	2	555	62	6.65												2.27					2.01															1
FALSE	High	Master Protein	A0A177IA45	Nicotinamide riboside transporter PnuC OS=Serratia marcescens OX=615 GN=BVG97_03315 PE=4 SV=1		0	FALSE	4.378	5	1	1	1	241	27.2	6.04																				2.45
FALSE	High	Master Protein	A0A0G8BC51	Nif3-like dinuclear metal center hexameric protein OS=Serratia marcescens OX=615 GN=BVG93_02890 PE=4 SV=1		0	FALSE	4.175	6	1	1	1	247	26.9	6.52																				3.23
FALSE	High	Master Protein	A0A087ZZA0	Nipped-B protein OS=Apis mellifera OX=7460 PE=3 SV=1		0	FALSE	4.291	1	1	5	1	2007	227.6	6.96	0						1.94				0		2.13								1						1				1		1
FALSE	High	Master Protein	A0A2G4QJD9	Nitrite reductase large subunit OS=Serratia marcescens OX=615 GN=CS368_11870 PE=3 SV=1		0.009	FALSE	2.239	1	1	4	1	849	93.1	6.65	1.41	0						0											0		1	1						1
FALSE	High	Master Protein	A0A0F6KVY3	Nitrogen regulatory protein P-II OS=Serratia marcescens OX=615 GN=glnB PE=3 SV=1		0.002	FALSE	3.121	7	1	2	1	112	12.5	5.15									1.66					1.7															1					1
FALSE	High	Master Protein	A0A087ZWA0	Non-specific serine/threonine protein kinase OS=Apis mellifera OX=7460 GN=Akt1 PE=4 SV=1		0	FALSE	10.62	7	2	3	2	544	60.8	6.55							2.33							0			2.96										1							1
FALSE	High	Master Protein	A0A087ZXD9	Non-specific serine/threonine protein kinase OS=Apis mellifera OX=7460 GN=SNF1A PE=4 SV=1		0	FALSE	15.114	9	3	4	3	515	58.5	8.4							2.96									2.17		3.31	0								1
FALSE	High	Master Protein	A0A087ZZZ5	Nop domain-containing protein OS=Apis mellifera OX=7460 GN=LOC413935 PE=4 SV=1		0	FALSE	41.504	16	7	41	7	578	65.2	8.13	10.58	9.58	2.94	1.69	3.63	1.99	13.58	4.85			6.77	6.8	6.79		1.62		3.36	1.76	1.61		2	3	2	1	2	1	4	2			3	2	4
FALSE	High	Master Protein	A0A088AQN0	Nop domain-containing protein OS=Apis mellifera OX=7460 PE=4 SV=1		0	FALSE	27.192	20	7	18	7	468	52.1	9.36	4	3.04	0	2.1	2.09		5.72				5.02	0	0				2.32		1.76		2	1	2	1	2		3				3	1	1
FALSE	High	Master Protein	A0A088ACB7	NRF domain-containing protein OS=Apis mellifera OX=7460 GN=LOC411564 PE=4 SV=1		0.009	FALSE	2.259	2	1	1	1	711	82.4	8.19		0																				1
FALSE	High	Master Protein	A0A088A092	NRF domain-containing protein OS=Apis mellifera OX=7460 PE=4 SV=1		0	FALSE	16.19	9	4	5	4	637	73.3	8.85		6.86					5.28															3					2
FALSE	High	Master Protein	A0A088A0Q7	Nsp1_C domain-containing protein OS=Apis mellifera OX=7460 PE=4 SV=1		0	FALSE	9.958	8	3	4	3	464	48.8	4.87		1.88										2.09					2.75		1.96			1										1
FALSE	High	Master Protein	A0A1Q5WAL0	N-succinylarginine dihydrolase OS=Serratia marcescens OX=615 GN=astB PE=3 SV=1		0	FALSE	5.958	4	1	1	1	446	49.5	6.67																				3.75
FALSE	High	Master Protein	A0A0P0QK29	N-succinylglutamate 5-semialdehyde dehydrogenase OS=Serratia marcescens OX=615 GN=astD PE=3 SV=1		0.006	FALSE	2.618	2	1	1	1	490	52.2	7.01																				2.53
FALSE	High	Master Protein	A0A088AA24	Nt_Gln_amidase domain-containing protein OS=Apis mellifera OX=7460 GN=725501 PE=4 SV=1		0	FALSE	4.286	5	1	1	1	223	25.9	6.74										3.27																				1
FALSE	High	Master Protein	A0A088ACJ3	NTF2 domain-containing protein OS=Apis mellifera OX=7460 GN=LOC409406 PE=4 SV=1		0	FALSE	18.639	17	1	23	1	130	14.9	5.78	3.91	7.21	5.41	5.83	3.25	3.35	2.88	3	3.26	4.1	8.08	12.21	3.3	6.68							1	1	1	1	1	1	1	1	1	1	1	1	1	1
FALSE	High	Master Protein	A0A087ZXL9	NTP_transferase domain-containing protein OS=Apis mellifera OX=7460 GN=LOC413435 PE=4 SV=1		0	FALSE	15.26	11	4	24	4	420	46.3	8.22	4.14	6.19	3.76	1.88	1.74	1.86	1.93	1.94	1.91		4.03	1.98	1.75	0		0		4.51	2.23		1	2	1	1	1	1	1	1	1		1	1	1	2
FALSE	High	Master Protein	A0A088A202	NTP_transferase domain-containing protein OS=Apis mellifera OX=7460 PE=4 SV=1		0	FALSE	23.057	15	5	15	5	359	39.8	6.2	2.83				2.49						6.45	3.73	2.91			4.3	0	5.41	7.06		1				1						2	1	1
FALSE	High	Master Protein	A0A088A7R5	Nuclear pore complex protein OS=Apis mellifera OX=7460 GN=Nup107 PE=3 SV=1		0	FALSE	4.755	3	2	2	2	918	106.9	5.71											0						0														1
FALSE	High	Master Protein	A0A088A1B8	Nuclear pore protein OS=Apis mellifera OX=7460 GN=LOC410343 PE=3 SV=1		0	FALSE	43.47	17	9	25	9	824	93.8	6.1		4.91	9.33		5.28		2.21	0			2.88	5.6	17.89		2.01		5.32					2	4		2		1	1			2	2	6
FALSE	High	Master Protein	A0A0G8B9E0	Nucleoid-associated protein A8A12_17490 OS=Serratia marcescens OX=615 GN=ybaB PE=3 SV=1		0	FALSE	4.101	12	1	1	1	109	12	5.07																				2.94
FALSE	High	Master Protein	A0A088A7S0	Nucleoplasmin domain-containing protein OS=Apis mellifera OX=7460 GN=102655896 PE=4 SV=1		0	FALSE	20.327	32	3	28	3	171	18.8	4.75	2.74	12.28	2.87			5.33	2.77	2.69		2.88	11.03	11.35	2.9	1.68		2.71	5.28	5.21	3.06		1	3	1			1	1	1		2	2	2	1	1
FALSE	High	Master Protein	A0A087ZYB2	Nucleoporin NUP53 OS=Apis mellifera OX=7460 PE=3 SV=1		0	FALSE	7.002	7	1	1	1	318	34.4	8.54																	3.7
FALSE	High	Master Protein	A0A088ATV8	Nucleoside diphosphate kinase OS=Apis mellifera OX=7460 PE=3 SV=1		0	FALSE	76.19	72	11	136	11	154	17.6	7.33	24.05	21.92	11.56	6.28	6.75	22.37	25.62	22.38	2.47	19.51	36.73	39.09	11.57	6.35		0	24.79	8.88	10.87		6	6	3	3	3	7	7	7	3	6	9	8	4	3
FALSE	High	Master Protein	A0A084X081	Nucleoside diphosphate kinase OS=Serratia marcescens OX=615 GN=ndk PE=3 SV=1		0	FALSE	18.759	28	2	2	2	141	15.6	5.3																				8.59
FALSE	High	Master Protein	A0A221H9M2	Nucleoside triphosphatase NudI OS=Serratia marcescens OX=615 GN=nudI PE=3 SV=1		0.002	FALSE	3.06	13	1	1	1	141	16.3	5.07																				2.18
FALSE	High	Master Protein	A0A0P0QDZ3	Nucleoside-specific channel-forming protein Tsx OS=Serratia marcescens OX=615 GN=AR325_13345 PE=4 SV=1		0	FALSE	4.187	4	1	1	1	293	33.4	5.77																				2.93
FALSE	High	Master Protein	A0A1B4XLR7	Nucleotide-binding protein A6B47_03330 OS=Enterococcus faecalis OX=1351 GN=A6B47_03330 PE=3 SV=1		0.004	FALSE	2.766	3	1	15	1	295	33.9	5.4			4.13	3.96	6.4			4	1.9	8.08					1.67								1	1	1			1	1	1
FALSE	High	Master Protein	A0A087ZW82	Nudix hydrolase domain-containing protein OS=Apis mellifera OX=7460 GN=102655411 PE=4 SV=1		0.009	FALSE	2.252	6	1	1	1	246	28.5	9.11												0																				1
FALSE	High	Master Protein	A0A088A6N0	Nudix hydrolase domain-containing protein OS=Apis mellifera OX=7460 GN=mRpL46 PE=4 SV=1		0	FALSE	24.48	16	5	27	5	269	31.1	8.59	4.54	10.32	0		1.8		10.85	2.96		2.82		2.2	2.19								3	4	1		1		4	1		2		2	1
FALSE	High	Master Protein	A0A088AEE0	O-acyltransferase OS=Apis mellifera OX=7460 GN=LOC552313 PE=3 SV=1		0	FALSE	3.965	2	1	7	1	531	62.5	8.91		1.91			0		1.75				3.74	2.21	1.67									1			1		1				1	1	1
FALSE	High	Master Protein	A0A088ASQ1	Obg-like ATPase 1 OS=Apis mellifera OX=7460 GN=LOC413266 PE=3 SV=1		0	FALSE	38.596	24	8	28	8	397	44.6	7.78	10.48		2.94	2.4	0	6.6	3.23			4.46	7.41	1.65	3.33	1.93	0	1.65	1.68	5.07	1.76		2		1	1	1	2	1			1	4	1	1	3
FALSE	High	Master Protein	A0A087ZSV5	OBG-type G domain-containing protein OS=Apis mellifera OX=7460 GN=LOC411280 PE=4 SV=1		0	FALSE	11.102	8	2	10	2	367	41	8.87	2.45					0			0		5.32			1.87	0	1.65	2.93	2.16			1					1			1		2			1
FALSE	High	Master Protein	Q1W633	OBP21 OS=Apis mellifera OX=7460 GN=Obp21 PE=2 SV=1		0	FALSE	5.042	10	1	1	1	135	15.2	4.82																			1.69
FALSE	High	Master Protein	A0A088A3J5	OCIA domain-containing protein OS=Apis mellifera OX=7460 GN=asrij PE=4 SV=1		0	FALSE	45.926	49	8	68	8	233	27.2	5.12	17.22	15.52	10.48	8.23	12	5.04	15.26	11.57	5.04	8.42	5.38	2.73	10.04		0	1.84	9.95	7.86	2.73		4	2	2	2	2	2	3	3	1	2	2	2	2
FALSE	High	Master Protein	Q8WRW6	Odorant binding protein ASP4 OS=Apis mellifera OX=7460 PE=2 SV=1		0.002	FALSE	3.124	15	1	1	1	136	15.3	4.64										3.16																				1
FALSE	High	Master Protein	A0A1Q4NZL4	Oligopeptidase A OS=Serratia marcescens OX=615 GN=BHU62_12235 PE=3 SV=1		0	FALSE	8.128	4	2	2	2	680	76.3	5.14																				5.69
FALSE	High	Master Protein	A0A1Q4NTT5	Oligopeptide ABC transporter substrate-binding protein OppA OS=Serratia marcescens OX=615 GN=BHU62_23330 PE=4 SV=1		0	FALSE	28.9	19	8	14	8	545	61.4	7.06																				33.32
FALSE	High	Master Protein	A0A221DQU9	Oligopeptide ABC transporter substrate-binding protein OppA OS=Serratia marcescens OX=615 GN=BVG97_10275 PE=4 SV=1		0	FALSE	4.887	2	1	1	1	544	60.5	8.9																				3.14
FALSE	High	Master Protein	A0A088AW16	Oligosaccharyltransferase complex subunit OS=Apis mellifera OX=7460 PE=3 SV=1		0	FALSE	7.734	11	1	17	1	110	13	9.23	4.98	2.8	3.09	2.33		2.55	3.09		3.02	2.91	4.39	2.8	6.26	1.91	2.14	0					1	1	1	1		1	1		1	1	1	1	1	1
FALSE	High	Master Protein	V5YU02	OM lipoprotein OS=Serratia marcescens OX=615 GN=yraP PE=4 SV=1		0	FALSE	6.042	7	1	1	1	191	20	8.97																				3.49
FALSE	High	Master Protein	A0A0B4J2P4	OMPdecase domain-containing protein OS=Apis mellifera OX=7460 PE=3 SV=1		0.002	FALSE	3.431	4	1	2	1	468	52.2	8.63	0										0										1										1
FALSE	High	Master Protein	Q5J664	OmpX OS=Serratia marcescens OX=615 GN=ompX PE=4 SV=1		0	FALSE	22.955	28	4	12	4	172	18.3	7.91					7.65										7.66					20.49					2
FALSE	High	Master Protein	A0A088AFG9	Ornithine aminotransferase OS=Apis mellifera OX=7460 GN=Oat PE=3 SV=1		0	FALSE	94.706	50	15	55	15	425	47.3	8.29			12.3					30.36	33.8					81.3									4					9	11					15
FALSE	High	Master Protein	A0A0G3SVE7	Outer membrane protein assembly factor BamA OS=Serratia marcescens OX=615 GN=yaeT PE=3 SV=1		0	FALSE	40.124	13	10	14	10	808	89.6	6.54															2.08					32.72
FALSE	High	Master Protein	A0A221DTL7	Outer membrane protein assembly factor BamB OS=Serratia marcescens OX=615 GN=bamB PE=3 SV=1		0	FALSE	9.702	7	2	2	2	393	42.1	5.07																				5.99
FALSE	High	Master Protein	Q5J5B8	Outer membrane protein assembly factor BamC OS=Serratia marcescens OX=615 GN=nlpbsm PE=3 SV=1		0	FALSE	16.201	13	2	2	2	350	38	5.92																				7.75
FALSE	High	Master Protein	A0A1C3H919	Outer membrane protein assembly factor BamD OS=Serratia marcescens OX=615 GN=bamD PE=3 SV=1		0	FALSE	11.48	21	3	3	3	243	27.4	7.42																				5.89
FALSE	High	Master Protein	A0A1Q4NXB3	Outer membrane protein assembly factor BamE OS=Serratia marcescens OX=615 GN=bamE PE=3 SV=1		0	FALSE	5.696	18	1	1	1	112	12.4	8.47																				4.94
FALSE	High	Master Protein	A0A0P0QF51	Outer membrane protein OmpW OS=Serratia marcescens OX=615 GN=AR325_16195 PE=4 SV=1		0.001	FALSE	3.806	11	1	1	1	214	23.8	6.02															2.15
FALSE	High	Master Protein	A0A221FU00	Oxidative stress defense protein OS=Serratia marcescens OX=615 GN=BVG93_17750 PE=4 SV=1		0	FALSE	17.068	11	2	3	2	243	26.6	6.83																				9.93
FALSE	High	Master Protein	A0A088A9V1	Oxidored_q6 domain-containing protein OS=Apis mellifera OX=7460 GN=Ndufs7 PE=3 SV=1		0	FALSE	99.673	50	10	229	10	223	24.9	9.31	32.75	41.56	27.15	18.49	25.85	22.47	48.81	36.12	24.48	32.16	32.12	28.09	34.23	7.89	14.93	25.43	28.76	27.28	16.01	5.53	8	7	8	5	6	6	8	9	7	7	6	6	7	2
FALSE	High	Master Protein	A0A221DQ62	Oxidoreductase OS=Serratia marcescens OX=615 GN=BVG97_09110 PE=4 SV=1		0	FALSE	5.778	3	1	1	1	355	38.3	6.23																				3.03
FALSE	High	Master Protein	A0A2G4QPH1	Oxygen-dependent choline dehydrogenase OS=Serratia marcescens OX=615 GN=betA PE=3 SV=1		0	FALSE	6.231	4	1	1	1	555	61.4	6.49																				2.39
FALSE	High	Master Protein	A0A088A6G0	Oxysterol-binding protein OS=Apis mellifera OX=7460 PE=3 SV=1		0	FALSE	20.561	7	6	18	6	1034	116.3	7.4	2.29	10.11	2.21		0		4.84				1.65	0	0				0				2	4	1		1		2				1	1	1
FALSE	High	Master Protein	A0A088AUS5	Oxysterol-binding protein OS=Apis mellifera OX=7460 PE=3 SV=1		0.002	FALSE	3.052	1	1	2	1	708	80.6	6.61		2.31												1.82								1												1
FALSE	High	Master Protein	A0A088A0Y3	PA2c domain-containing protein OS=Apis mellifera OX=7460 GN=PLA2-2.4 PE=3 SV=1		0.002	FALSE	3.617	8	1	1	1	261	29.8	6.6														2.31																				1
FALSE	High	Master Protein	A0A088A4R3	PA2c domain-containing protein OS=Apis mellifera OX=7460 PE=3 SV=1		0	FALSE	31.598	43	8	28	8	230	25.6	7.5	7.15	4.94	0				2.6		0		10.99	9.49	2.69	2.01			4.86				4	3	1				2		1		5	5	1	1
FALSE	High	Master Protein	A0A088ATI3	PABS domain-containing protein OS=Apis mellifera OX=7460 GN=LOC410080 PE=4 SV=1		0	FALSE	50.63	30	9	21	9	366	41.2	5.07	8.77		2.11			2.18				2.78	3.4	3.33		5.35				3.36	14.37		3		1			1				1	1	2		3
FALSE	High	Master Protein	A0A088AEL4	PABS domain-containing protein OS=Apis mellifera OX=7460 GN=SpdS PE=3 SV=1		0	FALSE	14.827	12	3	5	3	293	32.6	6.16																			6.53
FALSE	High	Master Protein	A0A088AVY2	PALP domain-containing protein OS=Apis mellifera OX=7460 GN=Cbs PE=4 SV=1		0.004	FALSE	2.936	4	1	2	1	447	49.6	6.77											2.02	0																			1	1
FALSE	High	Master Protein	A0A2G4Q7I0	Pantothenate synthetase OS=Serratia marcescens OX=615 GN=panC PE=3 SV=1		0.002	FALSE	3.658	4	1	1	1	284	31.6	5.97														2.3																				1
FALSE	High	Master Protein	A0A088AL15	ParB domain-containing protein OS=Apis mellifera OX=7460 PE=3 SV=1		0	FALSE	10.06	5	1	22	1	426	47.3	9.2	4.18	6.69	1.85	0		0	6.88	0	0		0	0	3.91								1	1	1	1		1	1	1	1		1	1	1
FALSE	High	Master Protein	A0A088AST3	PCI domain-containing protein OS=Apis mellifera OX=7460 GN=LOC408397 PE=4 SV=1		0	FALSE	75.414	44	13	43	13	423	47.4	6.48	7.98	16.44	3.03			4.97	9.39			5.39	23.84	17.34	2.6	3.22	0	0	9.45		7.26		3	6	1			3	4			2	9	4	3	1
FALSE	High	Master Protein	A0A088AJ83	PCI domain-containing protein OS=Apis mellifera OX=7460 GN=LOC409062 PE=4 SV=1		0.01	FALSE	2.169	2	1	4	1	444	51.5	5.82	0				0						0	0									1				1						1	1
FALSE	High	Master Protein	A0A088AUX6	PCI domain-containing protein OS=Apis mellifera OX=7460 GN=LOC552319 PE=4 SV=1		0	FALSE	30.695	21	7	26	7	389	45.6	6.01	2.14	10.57				2.04	5.63				11.18	10.21				1.8	4.6	0	1.98		2	3				2	2				4	3
FALSE	High	Master Protein	A0A087ZZE8	PCI domain-containing protein OS=Apis mellifera OX=7460 GN=PCID2 PE=4 SV=1		0.002	FALSE	3.36	3	1	2	1	393	45.5	8.47			0								2.03												1								1
FALSE	High	Master Protein	A0A088A0Z2	PCI domain-containing protein OS=Apis mellifera OX=7460 GN=Rpn12 PE=4 SV=1		0	FALSE	17.006	21	3	9	3	266	30.4	5.07		4.32				6.42					4.67	5.12	4.83			2.1	3.24	3.69				1				2					1	1	1
FALSE	High	Master Protein	A0A088ASB8	PCI domain-containing protein OS=Apis mellifera OX=7460 GN=Rpn3 PE=4 SV=1		0	FALSE	59.29	29	12	47	12	495	56.9	8.28	9.84	5.4				7.1	11			7.37	11.49	20.46	6.59			8.78	11.31	4.65			5	4				4	5			3	4	6	4
FALSE	High	Master Protein	A0A088AD16	PCI domain-containing protein OS=Apis mellifera OX=7460 PE=4 SV=1		0	FALSE	50.441	25	8	62	8	373	42.3	6.71	9.14	9.48	2.04		2.47	11.29	10.42	0		2.26	17.9	14.8	8.87	5.14	2.07	12.44	6.78	6.13	12.22		3	4	2		1	5	5	1		1	6	5	3	2
FALSE	High	Master Protein	A0A088AD77	PCI domain-containing protein OS=Apis mellifera OX=7460 PE=4 SV=1		0	FALSE	8.456	7	2	9	2	411	47.2	5.54	2.57				2.29		2.8			4.74	2.76		2.91			0			0		1				1		1			1	1		1
FALSE	High	Master Protein	A0A088AM61	PCI domain-containing protein OS=Apis mellifera OX=7460 PE=4 SV=1		0	FALSE	52.487	29	9	87	9	455	52.2	6.98	27.77	16.01	12.99		3.37	15.2	19.72	5.48		2	28.4	21.41	11.9	2.84	2.77	2.05	4.04	7.56	0		6	5	5		1	6	7	4		1	7	5	6	1
FALSE	High	Master Protein	A0A088AP80	PCI domain-containing protein OS=Apis mellifera OX=7460 PE=4 SV=1		0.002	FALSE	3.036	4	1	1	1	477	54.4	7.01																0
FALSE	High	Master Protein	A0A087ZT54	PDE4_UCR domain-containing protein OS=Apis mellifera OX=7460 PE=4 SV=1		0	FALSE	5.191	6	1	1	1	177	18.9	8.32																			0
FALSE	High	Master Protein	A0A087ZXR8	PDZ domain-containing protein OS=Apis mellifera OX=7460 GN=100578519 PE=4 SV=1		0	FALSE	8.993	2	2	6	2	1116	126.5	5.86		2.28	1.92				1.89						2.3				3.03	2.41				1	1				1						1
FALSE	High	Master Protein	A0A088AUT1	PDZ domain-containing protein OS=Apis mellifera OX=7460 GN=LOC413207 PE=4 SV=1		0	FALSE	51.514	33	6	38	6	260	28.5	6.11	3.61	5.75				17.46			4.28	2.53	19.76	13.28		2.71		4.38	12.8	10.1	18.55		1	2				3			1	1	4	3		1
FALSE	High	Master Protein	A0A088A899	PDZ domain-containing protein OS=Apis mellifera OX=7460 PE=4 SV=1		0.002	FALSE	3.634	8	1	2	1	145	16.1	10.18																0			0
FALSE	High	Master Protein	A0A088AHV6	PDZ domain-containing protein OS=Apis mellifera OX=7460 PE=4 SV=1		0	FALSE	16.712	22	3	14	3	168	18.8	9.44	2.2	3.29				1.97	3.09		1.69				2.93			0	8.4	1.89	1.79		1	1				1	2		1				2
FALSE	High	Master Protein	A0A221FUM9	Penicillin-binding protein activator LpoA OS=Serratia marcescens OX=615 GN=lpoA PE=3 SV=1		0.008	FALSE	2.343	2	1	1	1	676	72.2	8.75																				3.16
FALSE	High	Master Protein	A0A087ZY53	Peptidase A1 domain-containing protein OS=Apis mellifera OX=7460 GN=cathD PE=3 SV=1		0	FALSE	119.816	56	14	260	14	385	42.2	6.32	55.71	52.06	45.43	27.95	67.92	24.61	63.93	43.25	45.07	15.26	39.46	49.5	49.7	33.06	13.33	18.71	25.89	6.34	13.11	10.02	9	9	8	8	11	8	10	8	8	4	9	8	8	9
FALSE	High	Master Protein	A0A221HCK0	Peptidase B OS=Serratia marcescens OX=615 GN=pepB PE=3 SV=1		0	FALSE	13.433	9	3	4	3	431	46.5	5.78																				12.4
FALSE	High	Master Protein	A0A1B4XQQ7	Peptidase M20 OS=Enterococcus faecalis OX=1351 GN=A6B47_10715 PE=4 SV=1		0	FALSE	4.421	3	1	1	1	436	48.3	4.89																				2.97
FALSE	High	Master Protein	A0A221DTK4	Peptidase M4 family protein OS=Serratia marcescens OX=615 GN=BVG97_15710 PE=4 SV=1		0	FALSE	8.967	10	2	3	2	341	37.6	6.61																				8.34
FALSE	High	Master Protein	A0A088ALY6	Peptidase S1 domain-containing protein OS=Apis mellifera OX=7460 GN=100576326 PE=3 SV=1		0	FALSE	35.79	18	6	43	6	417	45.9	5.71	2.01	10.24	12.73	1.85	19.23				1.88	4.64	2.11	2.25	12.61	2.11	0		5.45		0		1	3	4	4	4				1	2	1	2	5	2
FALSE	High	Master Protein	A0A088A9M1	Peptidase S1 domain-containing protein OS=Apis mellifera OX=7460 GN=SP22 PE=3 SV=1		0	FALSE	8.581	8	2	5	2	259	28	8.81				2.22					1.73					7.3										1					1					2
FALSE	High	Master Protein	A0A088ADM5	Peptidase S1 domain-containing protein OS=Apis mellifera OX=7460 GN=SP3 PE=3 SV=1		0	FALSE	28.091	25	6	24	6	353	39.5	6.81	5.71	18.78		1.78	2.04	2.64	3.17		4.5		0	0	0								3	4		2	1	2	2		2		1	1	1
FALSE	High	Master Protein	A0A088AGZ8	Peptidase S1 domain-containing protein OS=Apis mellifera OX=7460 GN=SP36 PE=3 SV=1		0	FALSE	62.677	38	7	79	7	263	28.1	7.68	3.05		11.95	2.47	2.1	40.65			9.94	21.06	8.83		9.95	34.89	1.93	6.61				17.19	1		5	3	2	6			3	5	3		3	6
FALSE	High	Master Protein	A0A087ZVC3	Peptidase S1 domain-containing protein OS=Apis mellifera OX=7460 GN=SPH54 PE=4 SV=1		0	FALSE	6.04	1	2	3	2	2733	301.1	4.48			0																0				1
FALSE	High	Master Protein	A0A087ZN39	Peptidase S1 domain-containing protein OS=Apis mellifera OX=7460 PE=3 SV=1		0	FALSE	23.334	19	3	5	3	268	28.6	8.57														3.66						13.39														1
FALSE	High	Master Protein	A0A087ZN40	Peptidase S1 domain-containing protein OS=Apis mellifera OX=7460 PE=3 SV=1		0	FALSE	54.331	35	7	80	7	276	29.4	8.75	6.14		16.27	4.7	0	47.5		3.21	27.25	21.62	5.53		20.86	26.8	0	11.03	2.39		1.68	14.38	2		5	2	1	7		2	6	5	2		5	6
FALSE	High	Master Protein	A0A087ZRJ1	Peptidase S1 domain-containing protein OS=Apis mellifera OX=7460 PE=3 SV=1		0	FALSE	12.699	17	3	9	3	302	33.8	7.37	0	2.1			3.76					0			0	2.85							1	1			2					1			1	2
FALSE	High	Master Protein	A0A088A359	Peptidase S1 domain-containing protein OS=Apis mellifera OX=7460 PE=3 SV=1		0	FALSE	11.867	8	3	5	3	391	43.7	5.39													1.98	8.79																			1	3
FALSE	High	Master Protein	A0A087ZWJ6	Peptidase S59 domain-containing protein OS=Apis mellifera OX=7460 GN=Nup98 PE=4 SV=1		0	FALSE	23.765	5	5	11	5	1818	198.8	6.81	6.34		2.24			2.43	4.23		2.02		2.28		7.59					2.19			2		1			1	1		1		1		2
FALSE	High	Master Protein	A0A088A6L1	Peptidase S72 domain-containing protein OS=Apis mellifera OX=7460 GN=100576978 PE=4 SV=1		0	FALSE	22.791	21	4	47	2	276	31.2	6.25	2.55	11.65	2.82	4.76	5.86	7.9	10.4	7.4	2.26	6.33	7.91	10.63	9.5	2.14	2.06	1.63	7.53	6.54	0		1	2	1	1	2	2	2	1	1	1	2	2	2	1
FALSE	High	Master Protein	A0A088ADK3	Peptidase_M24 domain-containing protein OS=Apis mellifera OX=7460 GN=LOC412221 PE=4 SV=1		0	FALSE	38.354	26	7	17	7	387	43.8	7.5	4.4										7.99					6.25	2.61	0	8.38		1										3
FALSE	High	Master Protein	A0A087ZYD9	Peptidase_M28 domain-containing protein OS=Apis mellifera OX=7460 PE=4 SV=1		0	FALSE	4.24	2	1	6	1	882	100.1	8.44	2.53	2.94	2.53		0		2.29			2.04											1	1	1		1		1			1
FALSE	High	Master Protein	A0A087ZW90	Peptidase_M3 domain-containing protein OS=Apis mellifera OX=7460 GN=LOC412154 PE=3 SV=1		0	FALSE	106.076	30	17	69	17	755	87.5	8.38	37.5	9.44	10.22	1.66	1.94		2.07	6.41		0	16.82	8.43	4.31	2.25		8.28	15.49	13.38	6.95		9	3	5	1	1		1	3		1	7	6	2	3
FALSE	High	Master Protein	A0A087ZUX9	Peptidase_M3 domain-containing protein OS=Apis mellifera OX=7460 PE=3 SV=1		0	FALSE	20.164	11	5	11	5	694	79.8	8.02	5.14		2.06					1.98			2.44	2.55	1.97				1.6				3		1					1			1	1	1
FALSE	High	Master Protein	A0A1Y0M007	Peptide ABC transporter substrate-binding protein OS=Enterococcus faecalis OX=1351 GN=A6B47_04000 PE=4 SV=1		0.006	FALSE	2.527	2	1	1	1	556	60.8	4.93																				0
FALSE	High	Master Protein	A0A088AFK3	Peptide deformylase OS=Apis mellifera OX=7460 GN=102654737 PE=3 SV=1		0.002	FALSE	3.715	4	1	14	1	233	27.1	6.98	0	2.35	0		0		0	0	0	0	0	0	0				0				1	1	1		1		1	1	1	1	1	1	1
FALSE	High	Master Protein	A0A0N7JNQ1	Peptide deformylase OS=Serratia marcescens OX=615 GN=def PE=3 SV=1		0.007	FALSE	2.416	7	1	2	1	169	19.3	5.66																				4.48
FALSE	High	Master Protein	A0A088ABK0	Peptide-methionine (R)-S-oxide reductase OS=Apis mellifera OX=7460 PE=3 SV=1		0	FALSE	6.331	9	1	2	1	180	20.5	8.85											3.5	4.74																			1	1
FALSE	High	Master Protein	A0A086FM61	Peptidoglycan-associated lipoprotein OS=Serratia marcescens OX=615 GN=pal PE=3 SV=1		0	FALSE	29.153	24	3	26	3	169	18.3	7.43	3.9				3.66	2.64			8.95		3.05			7.54	13.89					31.64	1				1	1			3		1			2
FALSE	High	Master Protein	A0A2G4P5Q5	Peptidyl-dipeptidase Dcp OS=Serratia marcescens OX=615 GN=CS368_25070 PE=3 SV=1		0	FALSE	43.259	17	9	11	9	733	82.5	6.32																				28.21
FALSE	High	Master Protein	A0A088A8D4	Peptidyl-prolyl cis-trans isomerase OS=Apis mellifera OX=7460 GN=LOC409890 PE=3 SV=1		0	FALSE	92.588	52	10	248	9	209	22.8	9.14	54.06	25.88	13.79	10.65	5.87	31.01	8.93	14.66	5.5	13.42	66.3	67.25	26.5	20.75	3.25	55.95	47.82	25.92	96.76		9	6	4	3	3	5	4	4	3	3	8	8	7	5
FALSE	High	Master Protein	A0A088AVK4	Peptidyl-prolyl cis-trans isomerase OS=Apis mellifera OX=7460 GN=LOC726409 PE=3 SV=1		0	FALSE	5.55	8	1	3	1	184	20.3	7.24	5.47											0									1											1
FALSE	High	Master Protein	A0A088A2A7	Peptidyl-prolyl cis-trans isomerase OS=Apis mellifera OX=7460 GN=parv1 PE=4 SV=1		0	FALSE	5.628	12	1	1	1	162	18	7.5											4.64																				1
FALSE	High	Master Protein	A0A088A5R9	Peptidyl-prolyl cis-trans isomerase OS=Apis mellifera OX=7460 PE=3 SV=1		0	FALSE	26.098	44	6	21	5	184	20.1	8.68	6.91					4.82					7.79	3				5.84	4.67	9.05	4.53	1.87	3					2					3	1
FALSE	High	Master Protein	A0A093SE48	Peptidyl-prolyl cis-trans isomerase OS=Pectobacterium carotovorum subsp. carotovorum OX=555 GN=KP17_10590 PE=3 SV=1		0	FALSE	10.841	15	3	6	1	272	28.9	5.94															3.18					14.17
FALSE	High	Master Protein	A0A093UUA0	Peptidyl-prolyl cis-trans isomerase OS=Pectobacterium carotovorum subsp. carotovorum OX=555 GN=KP17_14730 PE=3 SV=1		0	FALSE	8.575	15	2	2	2	206	22.3	4.86																				6.31
FALSE	High	Master Protein	A0A0A5L795	Peptidyl-prolyl cis-trans isomerase OS=Serratia marcescens OX=615 GN=fkpA_2 PE=3 SV=1		0	FALSE	17.676	21	4	6	2	279	29.6	8.87																				16.86
FALSE	High	Master Protein	A0A0A5M254	Peptidyl-prolyl cis-trans isomerase OS=Serratia marcescens OX=615 GN=ppiB PE=3 SV=1		0	FALSE	6.578	7	1	3	1	164	18	6.06																				7.66
FALSE	High	Master Protein	A0A1C3HK06	Peptidyl-prolyl cis-trans isomerase OS=Serratia marcescens OX=615 GN=slyD PE=3 SV=1		0	FALSE	17.843	23	2	7	2	195	20.9	5.19																				24.07
FALSE	High	Master Protein	A0A088ABX3	Peptidylprolyl isomerase OS=Apis mellifera OX=7460 GN=FK506-bp1 PE=4 SV=1		0	FALSE	27.449	18	5	26	5	354	40.4	4.89	5.69	5.53	4.73		2.35	2.12	5.34				5.06	2.07	5.57	2.02	1.93		1.84	6.09	2.28		2	2	2		1	2	2				2	2	2	1
FALSE	High	Master Protein	A0A088A2S8	Peptidylprolyl isomerase OS=Apis mellifera OX=7460 GN=FK506-bp2 PE=4 SV=1		0	FALSE	19.045	29	2	12	2	109	11.8	7.99	2.57					3.29			3.11		14.71	6.15		2.92		3.22	3.36				1					1			1		2	1		1
FALSE	High	Master Protein	A0A087ZPR8	Peptidylprolyl isomerase OS=Apis mellifera OX=7460 GN=FKBP59 PE=4 SV=1		0	FALSE	20.32	14	4	8	4	459	51.5	5.58	5.14										7.37					1.98		3.73	2.17		2										2
FALSE	High	Master Protein	A0A088A5M5	Peptidylprolyl isomerase OS=Apis mellifera OX=7460 GN=LOC550701 PE=4 SV=1		0	FALSE	5.123	6	2	2	2	382	43.2	6.73							4.85																				2
FALSE	High	Master Protein	A0A088A340	Peptidylprolyl isomerase OS=Apis mellifera OX=7460 PE=4 SV=1		0	FALSE	26.024	32	2	28	2	88	9.6	8.5	2.63	3.98	4.61			11.35		3.88			14.94	16.31	2.02	2.14		0	1.87	6.98	0		1	1	1			1		1			2	2	1	1
FALSE	High	Master Protein	A0A088AAR9	Peptidylprolyl isomerase OS=Apis mellifera OX=7460 PE=4 SV=1		0	FALSE	48.474	57	8	37	8	164	18.4	4.78	5.15	4.98	2.67			4.99					15.15	24.08				2.19	16.61	14.93			1	2	1			1					5	6
FALSE	High	Master Protein	A0A087ZYL4	Peroxiredoxin OS=Apis mellifera OX=7460 GN=Prx5 PE=3 SV=1		0	FALSE	55.987	52	6	141	6	185	20.2	8.84	30.13	16.85	18.02	3.33		22.01	19.66	17.97	3.49	5.36	22.03	22.36	17.87	14.3	2.16	10.87	19.43	13.95	15.98		5	3	4	1		4	4	4	1	2	4	5	4	3
FALSE	High	Master Protein	A0A093SIR9	Peroxiredoxin OS=Pectobacterium carotovorum subsp. carotovorum OX=555 GN=KP17_12640 PE=4 SV=1		0	FALSE	67.314	48	6	40	1	200	22.1	6.21					2.43	2.13			5.93	2.14	2.22			7.77	2.9					123.4					1	1			1	1	1			2
FALSE	High	Master Protein	A0A2G4QAQ8	Peroxiredoxin OS=Serratia marcescens OX=615 GN=CS371_17820 PE=4 SV=1		0	FALSE	77.149	58	8	53	1	200	22.2	5.82					2.43	2.13			5.93	2.14	2.22				4.65					145.57					1	1			2	1	1
FALSE	High	Master Protein	A0A084X5L9	Peroxiredoxin OS=Serratia marcescens OX=615 GN=tsaA PE=4 SV=1		0	FALSE	75.969	58	8	47	1	200	22.1	5.82					2.43	2.13			7.55	2.14	2.22			1.85	2.9					142.96					1	1			2	1	1			1
FALSE	High	Master Protein	A0A088A9F5	Pex14_N domain-containing protein OS=Apis mellifera OX=7460 GN=LOC552256 PE=4 SV=1		0	FALSE	7.724	15	2	7	2	265	30	6.29		2.33			2.57		2.62	2.32			0	2.48	2.33									1			1		1	1			1	1	1
FALSE	High	Master Protein	A0A087ZS94	PfkB domain-containing protein OS=Apis mellifera OX=7460 GN=LOC408441 PE=4 SV=1		0.002	FALSE	3.075	4	1	2	1	345	38.5	5.82																			0
FALSE	High	Master Protein	A0A088ARH8	PfkB domain-containing protein OS=Apis mellifera OX=7460 PE=4 SV=1		0	FALSE	14.868	8	2	5	2	322	35.1	6.98	3.33									2.44	3.5	3.89						2.01			1									1	1	1
FALSE	High	Master Protein	A0A088AFQ2	PH domain-containing protein OS=Apis mellifera OX=7460 GN=LOC408836 PE=4 SV=1		0	FALSE	29.474	10	6	23	6	713	81.1	6.8	4.17	10.34	7.53		4.87	3.17		2.75	2.66	5.4	4.12	5.14	3.76	5.37		5.35		3.61			1	2	2		1	1		1	1	2	1	2	2	2
FALSE	High	Master Protein	A0A087ZUN9	PH domain-containing protein OS=Apis mellifera OX=7460 PE=4 SV=1		0	FALSE	18.152	6	3	6	3	792	90	6.24	2.59	2.19	2.46				3.75				3.12							0			1	1	1				1				1
FALSE	High	Master Protein	A0A2G4QEN2	Phage shock protein PspA OS=Serratia marcescens OX=615 GN=CS371_06510 PE=4 SV=1		0	FALSE	47.534	32	5	12	5	221	25	5.38																				44.21
FALSE	High	Master Protein	A0A088A9W3	PHB domain-containing protein OS=Apis mellifera OX=7460 GN=Flo1 PE=3 SV=1		0	FALSE	30.442	17	6	34	6	429	47.5	5.55	2.41	5.35	2.4	4.87	1.81	7.72	5.5	2.35	6.55	1.84	6.92	2.26	11.01				4.79		5.95		1	2	1	2	1	4	1	1	2	1	2	1	2
FALSE	High	Master Protein	A0A088AJY9	PHB domain-containing protein OS=Apis mellifera OX=7460 GN=Flo2 PE=3 SV=1		0	FALSE	78.383	40	11	58	11	402	44	5.73	8.74	10.66	7.56	9.43	3.34	13.68	12.04	2.94	4.3		16.51	3.4	22.53		0	0	5.29	6.91	6.68		3	4	5	6	2	6	4	1	2		5	1	6
FALSE	High	Master Protein	A0A088AD80	PHB domain-containing protein OS=Apis mellifera OX=7460 GN=LOC551427 PE=4 SV=1		0	FALSE	10.567	8	2	2	2	324	37.2	6.33	1.99	4.22																			1	1
FALSE	High	Master Protein	A0A088AMB1	PHB domain-containing protein OS=Apis mellifera OX=7460 GN=LOC551944 PE=4 SV=1		0	FALSE	144.7	45	13	671	13	353	39.5	9.06	119.21	88.73	97.7	87.73	98.32	85.57	93.93	86.44	81.2	87.55	79.62	73.73	94.83	63.18	58.35	80.87	113.51	67.52	123.38	16.58	13	13	13	12	12	12	13	13	12	11	11	12	13	11
FALSE	High	Master Protein	A0A087ZYC8	PHB domain-containing protein OS=Apis mellifera OX=7460 PE=4 SV=1		0	FALSE	88.245	44	11	160	11	380	42.7	8.43	34.97	43.45	26.58	24.14	30.17	29.02	37.84	30	23.45	19.93	15.98	16.07	23.72	13.39	3.03	10.66	26.19	24.65	8.49		8	9	6	7	7	7	7	6	7	5	5	5	5	3
FALSE	High	Master Protein	A0A1Q4P0B4	Phenylacetic acid degradation bifunctional protein PaaZ OS=Serratia marcescens OX=615 GN=BHU62_11735 PE=4 SV=1		0	FALSE	4.876	2	1	1	1	688	74	6.62																				2.92
FALSE	High	Master Protein	A0A0P0QCY8	Phenylacetic acid degradation protein OS=Serratia marcescens OX=615 GN=AR325_11400 PE=4 SV=1		0	FALSE	11.731	21	2	4	2	150	15.5	8																				15.42
FALSE	High	Master Protein	A0A1Q5WCA4	Phenylalanine--tRNA ligase alpha subunit OS=Serratia marcescens OX=615 GN=pheS PE=3 SV=1		0.002	FALSE	3.071	6	1	1	1	327	36.9	5.92																				2.12
FALSE	High	Master Protein	A0A1Q5WCC6	Phenylalanine--tRNA ligase beta subunit OS=Serratia marcescens OX=615 GN=pheT PE=3 SV=1		0	FALSE	5.881	2	1	1	1	795	86.9	5.26																				3.03
FALSE	High	Master Protein	A0A0M4QRU1	PhoH family protein OS=Serratia marcescens OX=615 GN=ybeZ PE=4 SV=1		0	FALSE	8.483	7	2	2	2	351	39.4	6.15																				5.75
FALSE	High	Master Protein	A0A087ZN35	Phorbol-ester/DAG-type domain-containing protein OS=Apis mellifera OX=7460 PE=4 SV=1		0	FALSE	4.901	15	2	7	2	143	15.6	9.63	2.64	0					0						2.2				4.44	2.43			1	1					1						1
FALSE	High	Master Protein	A0A088AHV4	Phos_pyr_kin domain-containing protein OS=Apis mellifera OX=7460 GN=LOC552663 PE=4 SV=1		0	FALSE	44.249	32	8	22	8	296	33.3	6.55						1.75					10.21	22.12	4.91			0	3.3		10.91							1					4	7	2
FALSE	High	Master Protein	A0A093V2L2	Phosphate acetyltransferase OS=Pectobacterium carotovorum subsp. carotovorum OX=555 GN=KP17_09265 PE=3 SV=1		0	FALSE	8.448	3	2	3	2	712	77	5.78																				9.74
FALSE	High	Master Protein	A0A088ASM4	Phosphate carrier OS=Apis mellifera OX=7460 GN=LOC413517 PE=2 SV=1		0	FALSE	153.864	44	20	917	20	354	39.1	9.1	175.75	134.72	96.09	109.05	123.12	101.32	123	81.28	84.61	76.74	99.47	83.14	102.64	89.25	58.35	83.47	139.09	90.64	53.82	18.2	18	16	15	18	17	16	15	14	16	13	14	14	14	14
FALSE	High	Master Protein	A0A088AAD6	Phosphatidylinositol-4,5-bisphosphate 4-phosphatase OS=Apis mellifera OX=7460 GN=LOC408301 PE=4 SV=1		0	FALSE	10.954	13	2	13	2	253	27.3	8.4	3.4	6.48	3.67				6.37	2.93			3.88	6.89	3.37				0				1	2	1				2	1			1	2	2
FALSE	High	Master Protein	A0A221FLA7	Phospho-2-dehydro-3-deoxyheptonate aldolase OS=Serratia marcescens OX=615 GN=BVG84_02780 PE=3 SV=1		0	FALSE	9.496	9	2	3	2	350	37.6	6.46																				7.11
FALSE	High	Master Protein	A0A1B4XLK9	Phosphocarrier protein HPr OS=Enterococcus faecalis OX=1351 GN=A6B47_03065 PE=4 SV=1		0.006	FALSE	2.568	11	1	1	1	88	9.3	4.92														1.7																				1
FALSE	High	Master Protein	A0A087ZT55	Phosphodiesterase OS=Apis mellifera OX=7460 GN=dnc PE=3 SV=1		0	FALSE	11.823	5	2	4	2	534	59.7	5.02											6.49						2.99														2
FALSE	High	Master Protein	A0A088AKF6	Phosphodiesterase OS=Apis mellifera OX=7460 PE=3 SV=1		0.009	FALSE	2.241	2	1	2	1	918	101.1	8.35																	0
FALSE	High	Master Protein	A0A1Q4NZW1	Phosphoenolpyruvate carboxykinase (ATP) OS=Serratia marcescens OX=615 GN=pckA PE=3 SV=1		0	FALSE	66.073	28	11	19	9	539	59.3	5.5									2.51					1.66						50.02									1					1
FALSE	High	Master Protein	A0A221H886	Phosphoenolpyruvate carboxykinase (ATP) OS=Serratia marcescens OX=615 GN=pckA PE=3 SV=1		0	FALSE	12.181	7	3	5	1	539	59.3	5.78																				13.69
FALSE	High	Master Protein	A0A093V7N3	Phosphoenolpyruvate carboxylase OS=Pectobacterium carotovorum subsp. carotovorum OX=555 GN=ppc PE=3 SV=1		0	FALSE	13.549	6	5	7	1	879	98.5	5.6					0				1.71						0					4.32					2				1
FALSE	High	Master Protein	A0A2G4QHT3	Phosphoenolpyruvate carboxylase OS=Serratia marcescens OX=615 GN=ppc PE=3 SV=1		0	FALSE	15.872	6	5	7	1	878	98.4	6.13					0				1.71						0					4.72					2				1
FALSE	High	Master Protein	A0A093T9K7	Phosphoenolpyruvate synthase OS=Pectobacterium carotovorum subsp. carotovorum OX=555 GN=KP17_03050 PE=3 SV=1		0	FALSE	8.494	4	3	5	1	792	86.9	5.29														0	1.97					5.53														1
FALSE	High	Master Protein	A0A0P0QEI7	Phosphoenolpyruvate synthase OS=Serratia marcescens OX=615 GN=AR325_13885 PE=3 SV=1		0	FALSE	52.534	17	11	22	9	792	87.3	5.26														0	1.97					44.96														1
FALSE	High	Master Protein	A0A1Q5W146	Phosphoenolpyruvate-protein phosphotransferase OS=Serratia marcescens OX=615 GN=A8A12_10305 PE=3 SV=1		0	FALSE	36.856	16	8	16	8	575	63.1	4.82														2.3	2.14					32.46														1
FALSE	High	Master Protein	A0A1Q4NWH6	Phosphoglucomutase, alpha-D-glucose phosphate-specific OS=Serratia marcescens OX=615 GN=BHU62_18800 PE=3 SV=1		0	FALSE	14.157	9	4	4	4	547	58.7	6.49																				10.52
FALSE	High	Master Protein	A0A087ZNJ8	Phosphoglycerate kinase OS=Apis mellifera OX=7460 GN=Pgk PE=3 SV=1		0	FALSE	227.255	74	24	291	24	415	45	8.12	103.3	48.1	10.52		1.84	29.89	7.57	2.96		10.1	145.39	122.65	35.76	27.19		65.51	67.33	15.13	38.75		18	14	4		1	10	4	1		4	21	19	10	9
FALSE	High	Master Protein	V5T8A6	Phosphoglycerate kinase OS=Lactobacillus mellis OX=1218508 GN=pgk PE=3 SV=1		0	FALSE	6.502	3	2	2	2	404	43.1	5.34			2.99																	2.31			1
FALSE	High	Master Protein	A0A093S5B7	Phosphoglycerate kinase OS=Pectobacterium carotovorum subsp. carotovorum OX=555 GN=pgk PE=3 SV=1		0	FALSE	53.245	28	7	45	3	387	41.1	5.47					2.1				11.07					9.96	8.76					76.17					2				4					4
FALSE	High	Master Protein	A0A2G4NXI3	Phosphoglycerate kinase OS=Serratia marcescens OX=615 GN=pgk PE=3 SV=1		0	FALSE	58.717	36	9	42	5	387	41.2	5.26									4.75					4.17	1.66					99.94									2					2
FALSE	High	Master Protein	A0A088A4K0	Phosphoglycerate mutase OS=Apis mellifera OX=7460 PE=3 SV=1		0	FALSE	152.568	57	16	209	16	312	35.3	9.35	57.19	10.6	2.56	14.06	5.21	39.36	2.99	2.68	22.34	17.49	69.65	89.6	23.05	17.36		45.53	47.18	12.71	37.37	1.96	12	3	1	3	2	9	1	1	7	5	13	15	7	5
FALSE	High	Master Protein	A0A080VCA3	Phosphoheptose isomerase OS=Serratia marcescens OX=615 GN=gmhA PE=3 SV=1		0	FALSE	15.124	23	4	4	4	193	20.8	6.21																				10.96
FALSE	High	Master Protein	B7UUK1	Phospholipase A2 OS=Apis mellifera OX=7460 GN=pla2 PE=2 SV=1		0	FALSE	116.715	62	10	113	10	167	19	7.39				4.97	2.25		2.08		2.06	192.79			8.45	1.68	15.98				2.4					2	2		1		1	10			4	2
FALSE	High	Master Protein	A0A221FSG2	Phospholipid-binding lipoprotein MlaA OS=Serratia marcescens OX=615 GN=BVG93_14680 PE=4 SV=1		0	FALSE	4.071	8	2	2	2	252	28	4.86																				4.92
FALSE	High	Master Protein	A0A088AVA3	Phospholipid-transporting ATPase OS=Apis mellifera OX=7460 GN=LOC552074 PE=3 SV=1		0	FALSE	7.383	2	2	3	2	1205	136.3	6.32				0							0		2.87											1							1		1
FALSE	High	Master Protein	A0A088A245	Phosphomannomutase OS=Apis mellifera OX=7460 GN=LOC550926 PE=3 SV=1		0	FALSE	34.157	39	7	16	7	262	30.4	5.95	5.2		0			0					8.01	2.63		2.16		5.01	6.85	3.32	5.47		2		1			1					3	1		1
FALSE	High	Master Protein	A0A093SHB5	Phosphopentomutase OS=Pectobacterium carotovorum subsp. carotovorum OX=555 GN=deoB PE=3 SV=1		0	FALSE	4.13	3	1	2	1	407	44	5.24														3.11	2.79																			1
FALSE	High	Master Protein	A0A0U7CPZ5	Phosphopentomutase OS=Serratia marcescens OX=615 GN=deoB PE=3 SV=1		0	FALSE	11.085	6	2	3	2	407	44.4	5.24														5.46						3.36														1
FALSE	High	Master Protein	A0A088A6W8	Phosphotransferase OS=Apis mellifera OX=7460 PE=3 SV=1		0	FALSE	23.708	19	6	10	6	445	49.6	6.27			2.65							1.75	3.27	5.57	6.54	5.19			1.85						1							1	1	2	2	2
FALSE	High	Master Protein	A0A088AFG2	PI3K/PI4K domain-containing protein OS=Apis mellifera OX=7460 PE=4 SV=1		0.002	FALSE	3.366	2	1	1	1	466	53.7	7.15		1.71																				1
FALSE	High	Master Protein	A0A088AMP9	PID domain-containing protein OS=Apis mellifera OX=7460 GN=102656070 PE=4 SV=1		0	FALSE	16.533	11	5	13	5	558	60.6	9.77			5.95	4.43	4.69		3.64				0	2.11	2.32					3.02					2	2	2		2				1	1	1
FALSE	High	Master Protein	A0A087ZS23	PID domain-containing protein OS=Apis mellifera OX=7460 GN=ced-6 PE=4 SV=1		0	FALSE	22.839	12	5	20	5	459	51.1	6.7	4.42	6.51	2.67			1.62	5.34			3.32	7.13		1.88			0	2.28	4.06	1.96		3	2	1			1	2			1	3		1
FALSE	High	Master Protein	A0A088AW75	PID domain-containing protein OS=Apis mellifera OX=7460 GN=LOC552297 PE=4 SV=1		0	FALSE	3.992	7	1	1	1	312	34.6	7.74																			0
FALSE	High	Master Protein	A0A087ZN43	Piezo-type mechanosensitive ion channel component OS=Apis mellifera OX=7460 PE=3 SV=1		0	FALSE	13.375	1	3	7	3	2681	310.5	8.32							7.06				3.72	1.64	2.71														3				2	1	1
FALSE	High	Master Protein	A0A0M4IQS3	Pilus assembly protein OS=Serratia marcescens OX=615 GN=AR325_09840 PE=4 SV=1		0	FALSE	16.192	20	3	10	3	175	18.1	5.54					2.84				2.09						4.37					10.95					1				1
FALSE	High	Master Protein	A0A088AMH9	PIPK domain-containing protein OS=Apis mellifera OX=7460 GN=LOC409276 PE=4 SV=1		0	FALSE	15.932	10	4	6	4	494	56.7	7.52		0				0					3.74	8.38										1				1					2	2
FALSE	High	Master Protein	A0A088AEL8	PKcGMP_CC domain-containing protein OS=Apis mellifera OX=7460 PE=4 SV=1		0.002	FALSE	3.23	6	1	5	1	174	19.2	7.72							0		0			2.02	0	0													1		1			1	1	1
FALSE	High	Master Protein	A0A088ATI9	PKS_ER domain-containing protein OS=Apis mellifera OX=7460 GN=LOC408643 PE=4 SV=1		0	FALSE	57.092	29	8	57	8	401	44.2	6.15	16.74	7.73	5.84		5.61	2.44	2.32	2.11			19.22	12.39	10.29	3.32	1.79	3.83	3.1	8.2	6.8		6	3	4		3	2	2	1			5	4	4	1
FALSE	High	Master Protein	A0A088A347	PKS_ER domain-containing protein OS=Apis mellifera OX=7460 GN=LOC409207 PE=4 SV=1		0	FALSE	20.634	14	4	9	4	471	51.3	5.76										13.42	3.8	2.71		6.14				2.24												3	1	1		2
FALSE	High	Master Protein	A0A088AD00	PKS_ER domain-containing protein OS=Apis mellifera OX=7460 GN=LOC410167 PE=4 SV=1		0	FALSE	34.157	31	7	23	7	338	36.7	8.02			7.29					6.53	3.52		7.88	8.94		28.93									3					2	1		2	2		6
FALSE	High	Master Protein	A0A088AP84	PKS_ER domain-containing protein OS=Apis mellifera OX=7460 GN=LOC411304 PE=4 SV=1		0	FALSE	16.045	10	3	9	3	388	42.8	9.17	8.73	2.01	2.1	0			2.52				2.63	2.44									3	1	1	1			1				1	1
FALSE	High	Master Protein	A0A088ABQ7	PKS_ER domain-containing protein OS=Apis mellifera OX=7460 GN=LOC552665 PE=4 SV=1		0	FALSE	12.609	9	3	7	3	386	42.6	6.16	3.08					2.05					2.37	2.09				3.84					1					1					1	1
FALSE	High	Master Protein	A0A087ZU72	PKS_ER domain-containing protein OS=Apis mellifera OX=7460 PE=3 SV=1		0	FALSE	113.424	49	14	82	14	364	39.8	7.8	9.23	2.05	12.53			9.76		24.29	5.21		31.18	36.34	5.83	59.6	0	1.91	10.55		13.2		2	1	5			3		5	4		6	6	2	8
FALSE	High	Master Protein	A0A087ZXT8	PKS_ER domain-containing protein OS=Apis mellifera OX=7460 PE=4 SV=1		0	FALSE	117.379	59	14	180	14	342	38.1	9.04	72.93	54.92	53.68	2.11	2.36	50.79	60.67	47.86	2.5	15.12	57.65	68.14	28.89	13.49		10.21	25.28	22.99	14.82		13	8	10	1	1	9	10	6	1	4	10	11	4	5
FALSE	High	Master Protein	A0A088AE44	PLAC domain-containing protein OS=Apis mellifera OX=7460 GN=LOC409970 PE=4 SV=1		0	FALSE	45.248	22	10	44	10	629	70	7.23	0	0	0	0	0	14.5	0	0	19.88		0	2.18	2.38	0			3.05	0	2.13	0	1	1	1	1	1	5	2	1	8		2	1	2	1
FALSE	High	Master Protein	A0A088A2S7	PlsC domain-containing protein OS=Apis mellifera OX=7460 GN=LOC552089 PE=4 SV=1		0.008	FALSE	2.364	4	1	3	1	318	36.7	8.95	0										1.77		2.27								1										1		1
FALSE	High	Master Protein	A0A088AHM2	PlsC domain-containing protein OS=Apis mellifera OX=7460 GN=LOC552688 PE=4 SV=1		0.002	FALSE	3.195	3	1	2	1	376	44	8.87		2.27				2.04																1				1
FALSE	High	Master Protein	A0A088ALS3	PlsC domain-containing protein OS=Apis mellifera OX=7460 PE=4 SV=1		0	FALSE	24.035	29	7	22	7	273	31.6	9.55	3.3	8.31	2.58	0			7.3	0	1.82	2.82	5.19		5.51			2.19	5.97	2.88			1	3	1	1			3	1	1	1	2		2
FALSE	High	Master Protein	A0A087ZSU4	Plug_translocon domain-containing protein OS=Apis mellifera OX=7460 GN=Sec61alpha PE=3 SV=1		0	FALSE	37.364	17	6	42	6	476	52.4	8.38	5.29	14.94	7.74	0	4.49	7.68	11.29	2.2		2.52	2.44	5.52	2.64		2.31	1.98	4.89	2.21	8.32		2	4	3	1	3	3	3	2		1	2	2	2
FALSE	High	Master Protein	A0A087ZQX2	Poly [ADP-ribose] polymerase OS=Apis mellifera OX=7460 PE=4 SV=1		0.002	FALSE	3.094	3	1	6	1	381	43.5	8.46		0					0				0	0	0									1					1				1	1	1
FALSE	High	Master Protein	A0A0U7H7F9	Poly(A) polymerase I OS=Serratia marcescens OX=615 GN=pcnB PE=3 SV=1		0	FALSE	6.021	3	1	1	1	438	50.8	9.5																				2.55
FALSE	High	Master Protein	A0A221H8T8	Polyketide cyclase OS=Serratia marcescens OX=615 GN=BVG84_08380 PE=4 SV=1		0.002	FALSE	3.204	7	1	1	1	163	18.2	8.12																				2.74
FALSE	High	Master Protein	A0A093SQA9	Polyribonucleotide nucleotidyltransferase OS=Pectobacterium carotovorum subsp. carotovorum OX=555 GN=pnp PE=3 SV=1		0	FALSE	30.724	13	7	14	1	706	76.4	5.36									6.98					2.53	2.65					19.6									3					2
FALSE	High	Master Protein	A0A0P0Q9M0	Polyribonucleotide nucleotidyltransferase OS=Serratia marcescens OX=615 GN=pnp PE=3 SV=1		0	FALSE	65.071	27	13	22	7	705	76.2	5.27									4.59					2.53	7.69					43.61									2					1
FALSE	High	Master Protein	A0A1Q5WEU5	Porin OmpA OS=Serratia marcescens OX=615 GN=A8A12_07565 PE=3 SV=1		0	FALSE	60.891	39	10	92	2	359	38.3	8.84	3.21			2.97	18	3.87		1.71	18.85	3.84				40.63	27.55		6.74	12.85		88.61	2			2	4	2		1	6	2				6
FALSE	High	Master Protein	A0A0P0QKE9	Porin OmpA OS=Serratia marcescens OX=615 GN=AR325_11020 PE=3 SV=1		0	FALSE	144.145	53	12	171	2	359	38.4	8.25	3.21			2.97	30.63	3.87		1.71	16.25	7.37				27.59	52.78		6.74	12.85		384.47	2			2	6	2		1	4	3				5
FALSE	High	Master Protein	A0A221FXS8	Porin OmpA OS=Serratia marcescens OX=615 GN=BVG93_05580 PE=3 SV=1		0	FALSE	127.263	48	12	169	1	359	38.3	8.24	3.21			2.97	24.26	3.87		1.71	16.25	9.16				40.63	47.31		6.74	12.85		360.59	2			2	5	2		1	4	4				6
FALSE	High	Master Protein	A0A0P0QH57	Porin OmpC OS=Serratia marcescens OX=615 GN=AR325_19860 PE=3 SV=1		0	FALSE	51.632	39	9	48	7	376	41.4	5.02	3.37			2.12	13.7	2.01			4.31	5.32	0			4.29	14.81					48.82	1			1	4	1			3	2	1			1
FALSE	High	Master Protein	A0A0U5ZIR9	Porin OmpN OS=Serratia marcescens OX=615 GN=ompN_1 PE=3 SV=1		0	FALSE	86.517	39	12	55	3	369	40.7	4.83	3.37			2.12	7.1	2.01			2.06	2.45	0			4.29	8.96					100.17	1			1	2	1			2	1	1			1
FALSE	High	Master Protein	A0A0P0QD26	Porin OS=Serratia marcescens OX=615 GN=AR325_10905 PE=3 SV=1		0	FALSE	59.551	36	11	53	1	375	41.1	4.96	3.37			2.12	7.1	2.01			4.13	2.45	0			4.29	11.43					69.7	1			1	2	1			3	1	1			1
FALSE	High	Master Protein	A0A221H7B2	Porin OS=Serratia marcescens OX=615 GN=BVG84_05265 PE=3 SV=1		0	FALSE	85.73	47	13	53	1	375	41.2	4.96	3.37			2.12	7.1	2.01			2.06	2.45	0			4.29	8.96					93.39	1			1	2	1			2	1	1			1
FALSE	High	Master Protein	A0A088AAV3	PPM-type phosphatase domain-containing protein OS=Apis mellifera OX=7460 GN=LOC551020 PE=3 SV=1		0	FALSE	8.805	5	1	3	1	329	36.9	6.61	0										2.15										1										1
FALSE	High	Master Protein	A0A088AUX7	PRA1 family protein OS=Apis mellifera OX=7460 GN=LOC410130 PE=3 SV=1		0	FALSE	20.144	26	4	68	4	196	22.4	9.22	8.43	9.74	10.32	4.19	12.62	10.55	13.7	7.71	10.12	9.17	11.38	4.68	15.8	8.2	8.2	6.81	0				2	3	2	2	3	4	3	3	3	3	3	2	4	2
FALSE	High	Master Protein	A0A0U5U232	Predicted transcriptional regulator OS=Serratia marcescens OX=615 GN=ytfJ PE=4 SV=1		0	FALSE	18.077	23	3	5	3	185	20.6	9.14																				11.25
FALSE	High	Master Protein	A0A088AD29	Prenylcys_lyase domain-containing protein OS=Apis mellifera OX=7460 PE=4 SV=1		0.002	FALSE	3.538	3	1	2	1	486	55.5	8.41		1.68										1.8										1										1
FALSE	High	Master Protein	A0A084X5L5	Preprotein translocase subunit YajC OS=Serratia marcescens OX=615 GN=yajC PE=4 SV=1		0	FALSE	14.609	26	3	8	3	110	11.8	9.58														4.34	2.31					9.84														1
FALSE	High	Master Protein	A0A088AR33	Pribosyltran domain-containing protein OS=Apis mellifera OX=7460 GN=Aprt PE=3 SV=1		0	FALSE	4.638	13	2	6	2	178	20	6.05	0	0						1.81			0										1	1						1			1
FALSE	High	Master Protein	A0A087ZTI8	Pribosyltran_N domain-containing protein OS=Apis mellifera OX=7460 GN=LOC551448 PE=4 SV=1		0	FALSE	26.965	21	5	14	5	370	40.5	8.27	3.13	2.71									9.97	12.52	2.78	3.97		2.68		2.88			1	1									3	4	1	1
FALSE	High	Master Protein	A0A084WZU6	PrkA family serine protein kinase OS=Serratia marcescens OX=615 GN=AR325_16560 PE=4 SV=1		0	FALSE	52.727	17	9	18	3	644	74.1	5.85									2.25					2.41	2.03					36.52									1					1
FALSE	High	Master Protein	A0A084X6Y4	Probable cytosol aminopeptidase OS=Serratia marcescens OX=615 GN=pepA PE=3 SV=1		0	FALSE	19.542	12	6	9	6	503	54.7	7.23														3.01						19.52														1
FALSE	High	Master Protein	A0A0B4J2M8	Probable tRNA N6-adenosine threonylcarbamoyltransferase OS=Apis mellifera OX=7460 GN=LOC411654 PE=3 SV=1		0	FALSE	8.613	5	1	1	1	335	37.3	6.52											4.05																				1
FALSE	High	Master Protein	A0A087ZNT2	Profilin OS=Apis mellifera OX=7460 GN=PRF PE=3 SV=1		0	FALSE	62.549	73	6	84	6	126	13.8	5.92	13.72	2.13	10.66	0	2.61	38.45		3.43	2.3	15.76	16.08	17.14	20.04	7.3	10.24	14.95	7.77	6.77	20.05		3	2	4	1	2	6		1	1	5	4	2	5	3
FALSE	High	Master Protein	A0A088AGQ1	Prohibitin OS=Apis mellifera OX=7460 GN=LOC408412 PE=3 SV=1		0	FALSE	221.665	81	18	849	18	271	30	7.06	164.4	169.84	134.98	111.62	135.45	118.12	152.94	112.93	121.62	115.43	105.13	111.55	142.59	78.63	82.35	70.95	169.2	134.81	115.51	18.01	14	15	13	14	12	12	14	13	15	15	13	14	14	13
FALSE	High	Master Protein	F1DFM1	Projectin long variant (Fragment) OS=Apis mellifera OX=7460 GN=PEVK PE=2 SV=1		0	FALSE	43.506	22	10	28	1	482	55.3	9.45		4.77					8.44	2.06			0	0					18.41	9.88	0			2					4	1			2	1
FALSE	High	Master Protein	A0A088AW48	Proliferating cell nuclear antigen OS=Apis mellifera OX=7460 GN=mus209 PE=3 SV=1		0	FALSE	5.372	5	1	3	1	261	29.1	4.82	2.6											2.72					2.43				1											1
FALSE	High	Master Protein	A0A088A8H2	Proline dehydrogenase OS=Apis mellifera OX=7460 PE=3 SV=1		0	FALSE	179.818	58	24	269	24	516	59.6	8.69	99.16	57.36	47.81	18.46	18.1	29.24	81.77	31.68	16.23	19.32	69.51	32.08	68.84	15.3	1.67	27.68	78.76	31.03	29.86		18	12	10	7	5	9	17	10	7	5	15	8	15	5
FALSE	High	Master Protein	A0A1Q5VYY1	Proline--tRNA ligase OS=Serratia marcescens OX=615 GN=proS PE=3 SV=1		0	FALSE	10.112	6	3	3	3	572	63.6	5.27																				7.26
FALSE	High	Master Protein	Q86MV4	Prophenoloxidase OS=Apis mellifera OX=7460 GN=PPO PE=2 SV=2		0	FALSE	87.822	34	17	47	17	693	80	6.76		7.17		6.26	2.24				13.49	9.04		0	1.67	42.15			0	5.54	2.26			3		5	1				6	3		1	1	12
FALSE	High	Master Protein	A0A0U8GUX0	Protease 4 OS=Serratia marcescens OX=615 GN=sppA_1 PE=3 SV=1		0	FALSE	6.331	2	1	2	1	618	66.9	6.1																				5.1
FALSE	High	Master Protein	A0A2G4QFM1	Protease C OS=Serratia marcescens OX=615 GN=CS371_08285 PE=4 SV=1		0	FALSE	11.589	6	2	3	1	538	57.7	4.82																				10.35
FALSE	High	Master Protein	A0A093SGP7	Protease OS=Pectobacterium carotovorum subsp. carotovorum OX=555 GN=KP17_14025 PE=4 SV=1		0	FALSE	7.069	5	1	1	1	304	33.7	5.44																				3.32
FALSE	High	Master Protein	A0A088A859	Proteasome endopeptidase complex OS=Apis mellifera OX=7460 GN=Pros29 PE=3 SV=1		0	FALSE	31.102	15	5	17	5	622	70.8	6.24		4.25	3.59			4.11	3.58	2.64		3.85	11.5	11.18	3.95	2.06			4.1		4.06			1	1			1	1	1		1	2	2	1	1
FALSE	High	Master Protein	A0A088A379	Proteasome subunit alpha type OS=Apis mellifera OX=7460 GN=LOC410095 PE=3 SV=1		0	FALSE	40.098	26	5	21	5	249	28.1	8.46		1.91				3.17				5.34	6.99	7.75					7.23	2.65	9.8			1				1				2	4	2
FALSE	High	Master Protein	A0A088ATC7	Proteasome subunit alpha type OS=Apis mellifera OX=7460 GN=LOC552654 PE=3 SV=1		0	FALSE	52.564	36	9	19	9	276	30.9	6.18		3.45				0						24.26	0				12.16	0	6.11			1				1						7	1
FALSE	High	Master Protein	A0A088AQ82	Proteasome subunit alpha type OS=Apis mellifera OX=7460 GN=Pros25 PE=3 SV=1		0	FALSE	20.029	31	5	11	5	234	25.8	7.36		2.92								1.91	2.32	10.23										3								1	2	4
FALSE	High	Master Protein	A0A087ZZN8	Proteasome subunit alpha type OS=Apis mellifera OX=7460 GN=Prosalpha5 PE=3 SV=1		0	FALSE	22.078	26	4	8	4	242	26.7	4.92		3.56				4.59						3.13					8.3		2.14			1				2						1
FALSE	High	Master Protein	A0A088AP06	Proteasome subunit alpha type OS=Apis mellifera OX=7460 GN=Prosalpha7 PE=3 SV=1		0	FALSE	14.903	16	3	6	3	254	27.9	6.09		0									0	9.13										1									1	3
FALSE	High	Master Protein	A0A088A1E9	Proteasome subunit beta OS=Apis mellifera OX=7460 GN=LOC408353 PE=3 SV=1		0	FALSE	9.214	7	1	3	1	277	30.3	7.42						4.22					4.8	5.42														1					1	1
FALSE	High	Master Protein	A0A087ZWB2	Proteasome subunit beta OS=Apis mellifera OX=7460 GN=LOC409978 PE=3 SV=1		0	FALSE	12.48	21	4	17	4	207	23.6	6.92	2.28	4.2					1.9			1.91	2.54	7.36	2.4	0			3.82	0	0		1	1					1			1	1	2	1	1
FALSE	High	Master Protein	A0A087ZZ62	Proteasome subunit beta OS=Apis mellifera OX=7460 GN=LOC411206 PE=3 SV=1		0	FALSE	9.402	5	1	1	1	282	31.6	7.5																			3.12
FALSE	High	Master Protein	A0A088AM79	Proteasome subunit beta OS=Apis mellifera OX=7460 GN=LOC411520 PE=3 SV=1		0	FALSE	25.814	25	5	13	5	267	30	7.84		2.89									1.86	13.96					2.21		3.96			1									3	4
FALSE	High	Master Protein	A0A088AMG0	Proteasome subunit beta OS=Apis mellifera OX=7460 GN=LOC552579 PE=3 SV=1		0.006	FALSE	2.479	5	1	7	1	205	23	5.25		2.09	2.09			2.13	2.01			2.83		0	2.16									1	1			1	1			1		1	1
FALSE	High	Master Protein	A0A087ZMT8	PROTEASOME_ALPHA_1 domain-containing protein OS=Apis mellifera OX=7460 PE=4 SV=1		0	FALSE	13.67	35	3	4	3	119	13.1	6.79		2.33										2.68					6.06					1										1
FALSE	High	Master Protein	A0A0P0QGR5	Protein deglycase HchA OS=Serratia marcescens OX=615 GN=AR325_18850 PE=4 SV=1		0	FALSE	4.17	3	1	1	1	291	32.1	5.64																				0
FALSE	High	Master Protein	A0A088A7Y2	Protein disulfide-isomerase OS=Apis mellifera OX=7460 GN=ERp60 PE=3 SV=1		0	FALSE	217.972	65	27	375	27	490	55.8	5.77	116.21	50.54	40.51	4.13	14.63	69.35	32.75	26.48	7.08	31.07	111.46	87.92	38.13	14.74	17.56	56.05	61.71	60.88	56.18		23	12	12	3	6	15	10	9	3	10	22	20	9	6
FALSE	High	Master Protein	A0A088A7L2	Protein disulfide-isomerase OS=Apis mellifera OX=7460 PE=3 SV=1		0	FALSE	198.733	64	28	209	28	496	56.2	5.12	45.12	13.79	30.54		4.25	50.12	5.71	19.31	0	23.48	72.13	62.92	18.4	5.52	0	11.84	56.17	44.8	46.3		15	5	11		2	12	2	6	1	7	18	15	6	4
FALSE	High	Master Protein	A0A0P0QH60	Protein ElaB OS=Serratia marcescens OX=615 GN=AR325_19975 PE=4 SV=1		0	FALSE	25.946	40	3	9	3	103	11.6	5.49																				30.91
FALSE	High	Master Protein	A0A0N7JQ58	Protein GrpE OS=Serratia marcescens OX=615 GN=grpE PE=3 SV=1		0	FALSE	24.751	28	3	7	3	194	21.7	5.08																				26.56
FALSE	High	Master Protein	A0A093UQS2	Protein HflC OS=Pectobacterium carotovorum subsp. carotovorum OX=555 GN=KP17_18065 PE=3 SV=1		0	FALSE	4.311	8	2	4	1	330	37.4	6.24														1.77	1.61					3.9														1
FALSE	High	Master Protein	A0A0U8DUE0	Protein HflC OS=Serratia marcescens OX=615 GN=hflC PE=3 SV=1		0	FALSE	10.244	7	2	5	1	334	37.4	6.42														1.77	1.61					9.43														1
FALSE	High	Master Protein	A0A2G4Q6S8	Protein HflK OS=Serratia marcescens OX=615 GN=CS371_21170 PE=3 SV=1		0	FALSE	17.651	12	4	7	4	416	45.3	8.19															4.29					13.28
FALSE	High	Master Protein	A0A088A8P9	Protein kinase C OS=Apis mellifera OX=7460 GN=aPKC PE=3 SV=1		0	FALSE	6.234	2	1	2	1	782	87.7	5.83							4.35						3.81														1						1
FALSE	High	Master Protein	A0A088A4Q2	Protein kinase domain-containing protein OS=Apis mellifera OX=7460 GN=CaMKI PE=3 SV=1		0	FALSE	7.916	8	2	2	2	374	41.9	6.55											2.39								1.95												1
FALSE	High	Master Protein	A0A087ZW71	Protein kinase domain-containing protein OS=Apis mellifera OX=7460 GN=CkIIalpha PE=3 SV=1		0	FALSE	52.008	17	7	59	7	468	55.6	8.56	5.27	12.53	2.99	0	3.26	5.36	18.13	6.91	0	4.34	15.71	9.29	11.01	1.65	0	0	15.58	4.89			1	5	2	1	1	2	4	3	1	1	5	4	4	2
FALSE	High	Master Protein	A0A088AFE4	Protein kinase domain-containing protein OS=Apis mellifera OX=7460 GN=Csnk1a1 PE=3 SV=1		0	FALSE	13.216	13	4	29	3	350	40.3	9.51	0	1.81	3.73	1.61	3.62	0	2.15	2.03	2.23	3.26	5.31	2.07	2.12	3.41	1.65	0	2.13	0			1	1	1	1	1	1	2	1	1	2	2	1	1	1
FALSE	High	Master Protein	A0A088AL91	Protein kinase domain-containing protein OS=Apis mellifera OX=7460 GN=Hr78 PE=3 SV=1		0.001	FALSE	3.777	2	1	2	1	420	48.2	8.28											0																				1
FALSE	High	Master Protein	A0A088A362	Protein kinase domain-containing protein OS=Apis mellifera OX=7460 GN=LOC408866 PE=4 SV=1		0.001	FALSE	3.909	2	1	1	1	522	59.7	9.13																	2.12
FALSE	High	Master Protein	A0A087ZVX1	Protein kinase domain-containing protein OS=Apis mellifera OX=7460 GN=LOC410732 PE=4 SV=1		0.006	FALSE	2.502	3	1	1	1	599	68	6.6																	0
FALSE	High	Master Protein	A0A088AAV8	Protein kinase domain-containing protein OS=Apis mellifera OX=7460 GN=LOC413190 PE=4 SV=1		0	FALSE	6.813	5	2	8	2	703	79.7	6.57																	0	2	0
FALSE	High	Master Protein	A0A088ATD3	Protein kinase domain-containing protein OS=Apis mellifera OX=7460 PE=3 SV=1		0	FALSE	50.014	35	11	51	10	410	46.4	8.51	8.08	5.46		2.21	2.13		14.19	2.6	4.06		13.89	2.08	2.66	1.78		9.61	17.73	9.37	12.87		4	3		1	1		5	1	2		5	2	1	1
FALSE	High	Master Protein	A0A087ZP17	Protein kinase domain-containing protein OS=Apis mellifera OX=7460 PE=4 SV=1		0	FALSE	42.208	18	8	28	8	652	72	8.22	12.01		2.5	0		6.08			1.74	0	15.05	2.16	5.85	2.06		1.68			9.8		4		1	1		2			2	1	5	1	2	1
FALSE	High	Master Protein	A0A088AP50	Protein kinase domain-containing protein OS=Apis mellifera OX=7460 PE=4 SV=1		0	FALSE	67.825	27	9	51	9	512	58.4	9.06	18.72	11.08	8.33		0	2.96	6.24	0	0	7.3	27.13	25.02	11.83	0		3.4	4.52	2.91	0		4	3	2		1	1	2	1	1	2	7	5	3	3
FALSE	High	Master Protein	A0A088AQR4	Protein kinase domain-containing protein OS=Apis mellifera OX=7460 PE=4 SV=1		0	FALSE	7.33	4	1	2	1	239	26.7	5.07											2.36						3.07														1
FALSE	High	Master Protein	A0A088AV92	Protein kinase domain-containing protein OS=Apis mellifera OX=7460 PE=4 SV=1		0	FALSE	7.692	5	2	8	1	515	58.6	8.68					3.34		3.51			0	1.62					0	0	0							1		2			1	1
FALSE	High	Master Protein	A0A088AVD7	Protein lin-7 homolog OS=Apis mellifera OX=7460 GN=LOC552362 PE=3 SV=1		0	FALSE	15.181	18	3	10	3	198	21.8	8.15	4.07	3.65				2.52					3.84	3.99	3.81			5	5.43				1	1				1					1	1	1
FALSE	High	Master Protein	A0A0P0QGE0	Protein of avirulence locus ImpE OS=Serratia marcescens OX=615 GN=AR325_17885 PE=4 SV=1		0.01	FALSE	2.181	4	1	1	1	267	29	5.01																				2.5
FALSE	High	Master Protein	L0TM98	Protein RecA (Fragment) OS=Pectobacterium carotovorum subsp. carotovorum OX=555 GN=recA PE=3 SV=1		0	FALSE	8.609	15	2	5	1	203	21.7	6.57														5.96	2.1					6.26														2
FALSE	High	Master Protein	A0A086FN92	Protein RecA OS=Serratia marcescens OX=615 GN=recA PE=3 SV=1		0	FALSE	10.568	9	3	6	2	354	37.9	5.19														5.57	2.1					8.56														2
FALSE	High	Master Protein	A0A088ACJ9	Protein RER1 OS=Apis mellifera OX=7460 GN=LOC410094 PE=3 SV=1		0	FALSE	27.651	24	4	19	4	197	23.6	8.82		2.53	2.87			4.58	6.24	2.63	2.01	7.13	2.28	3.51					4.27	3.29	3.35			1	1			1	2	1	1	3	1	1
FALSE	High	Master Protein	A0A2G4P2V6	Protein TolB OS=Serratia marcescens OX=615 GN=tolB PE=3 SV=1		0	FALSE	16.741	10	3	4	3	430	45.9	8.21																				11.27
FALSE	High	Master Protein	A0A1L6QWU2	Protein translocase subunit SecA OS=Serratia marcescens OX=615 GN=secA PE=2 SV=1		0	FALSE	9.682	3	2	2	2	902	102.5	5.5																				5.77
FALSE	High	Master Protein	A0A2G4PDW8	Protein translocase subunit SecD OS=Serratia marcescens OX=615 GN=secD PE=3 SV=1		0	FALSE	14.242	8	4	6	4	615	66.3	8.62																				12.88
FALSE	High	Master Protein	A0A0F6KUM6	Protein translocase subunit SecY OS=Serratia marcescens OX=615 GN=secY PE=3 SV=1		0	FALSE	5.569	4	1	3	1	443	48.6	9.89																				7.71
FALSE	High	Master Protein	A0A088AP14	Protein transport protein SEC23 OS=Apis mellifera OX=7460 GN=LOC408983 PE=3 SV=1		0	FALSE	51.428	18	9	28	9	775	86.5	7.01	11.5	2.57	3.48		2.29			2.21		6.68	22.75	14.19				3.71	4.18		2.07		3	1	1		1			1		2	6	5
FALSE	High	Master Protein	A0A088APZ1	Protein transport protein Sec61 subunit beta OS=Apis mellifera OX=7460 GN=Sec61beta PE=3 SV=1		0	FALSE	21.711	52	2	14	2	94	10	11	3.03	3.19	3.57		2.43	4.91	3.2				2.65	2.68	2.96		0		3.24		4.66		1	1	1		1	1	1				1	1	1
FALSE	High	Master Protein	A0A088AA80	Protein YIPF OS=Apis mellifera OX=7460 GN=102654121 PE=3 SV=1		0	FALSE	5.284	5	1	5	1	249	27.2	4.34	2.74					2.48					2.73					1.7		2.28			1					1					1
FALSE	High	Master Protein	A0A086FGT2	Protein-export protein SecB OS=Serratia marcescens OX=615 GN=secB PE=3 SV=1		0	FALSE	23.305	33	3	16	3	156	17.2	4.25	0				0	0			0						0					24.5	1				1	1			1
FALSE	High	Master Protein	A0A087ZYU1	Protein-L-isoaspartate O-methyltransferase OS=Apis mellifera OX=7460 GN=LOC409488 PE=3 SV=1		0.002	FALSE	3.398	6	1	1	1	244	26.9	5.99												3.03																				1
FALSE	High	Master Protein	A0A087ZYZ9	Protein-L-isoaspartate O-methyltransferase OS=Apis mellifera OX=7460 PE=3 SV=1		0.006	FALSE	2.555	3	1	1	1	264	28.6	5.41																			0
FALSE	High	Master Protein	A0A088AA34	Protein-serine/threonine kinase OS=Apis mellifera OX=7460 GN=Pdk PE=3 SV=1		0	FALSE	85.643	50	14	69	14	416	47.6	8	38.85	17.04	7.33	2.29	2.32	2.49	40.72	8.55			9.86	17.57	4.65	1.94		1.67	1.8	5.82			11	8	3	1	1	2	10	4			4	5	3	1
FALSE	High	Master Protein	A0A088AVM2	Protein-tyrosine sulfotransferase OS=Apis mellifera OX=7460 GN=Tango13 PE=3 SV=1		0	FALSE	6.418	11	2	6	2	380	43.1	8.85		2.53	2.27		2.01	2.2			2.13				0									1	1		1	1			1				1
FALSE	High	Master Protein	A0A087ZXB2	Protoporphyrinogen oxidase OS=Apis mellifera OX=7460 GN=Ppox PE=3 SV=1		0	FALSE	77.954	40	14	67	14	477	53.3	9	16.03	7.77	7.58	2.08	2.43	3.47	10.42	9.31	7.31	0	15.06	11.55	8.96	4.73		4.69	9.23	9.17	4.96		8	5	3	1	1	2	6	6	3	1	5	4	3	2
FALSE	High	Master Protein	A0A1Q4NTL2	Pseudouridine synthase OS=Serratia marcescens OX=615 GN=BHU62_23750 PE=3 SV=1		0.007	FALSE	2.474	4	1	1	1	325	36.4	6.98																				1.69
FALSE	High	Master Protein	A0A088A0F6	PSP domain-containing protein OS=Apis mellifera OX=7460 GN=LOC726336 PE=4 SV=1		0	FALSE	12.97	4	3	3	3	728	80.7	5.82							0										5.18										1
FALSE	High	Master Protein	A0A2H4MCS2	Pterin-4-alpha-carbinolamine dehydratase (Fragment) OS=Apis mellifera OX=7460 GN=PCD PE=2 SV=1		0	FALSE	13.917	32	3	12	3	117	13.8	9.14						6.68		2.16			8.57	9.82						1.86	2.39							3		1			3	3
FALSE	High	Master Protein	A0A0U5YN38	PTS glucose transporter subunit IIBC OS=Serratia marcescens OX=615 GN=A8A12_06900 PE=4 SV=1		0.001	FALSE	3.875	5	1	1	1	477	50.5	8.59									0																				1
FALSE	High	Master Protein	A0A0P0QFT1	PTS mannose transporter subunit EIIAB OS=Serratia marcescens OX=615 GN=AR325_16975 PE=4 SV=1		0	FALSE	7.153	6	1	1	1	319	34.6	5.6																				3.81
FALSE	High	Master Protein	A0A084X030	PTS mannose transporter subunit IID OS=Serratia marcescens OX=615 GN=manZ_1 PE=4 SV=1		0	FALSE	12.156	13	3	4	3	280	30.8	9.48																				10.75
FALSE	High	Master Protein	A0A1L6QVM1	PTS N-acetyl glucosamine transporter subunit IIABC OS=Serratia marcescens OX=615 GN=BVG97_03000 PE=4 SV=1		0	FALSE	4.553	2	1	1	1	678	71.6	6.27																				2.87
FALSE	High	Master Protein	Q8L3C4	PTS system glucose-specific component IIA OS=Serratia marcescens OX=615 GN=crr PE=4 SV=1		0	FALSE	42.041	51	6	20	1	169	18.2	4.98	3.61								5.31					9.68	0					35.65	1								2					3
FALSE	High	Master Protein	A0A093UYV2	PTS system glucose-specific transporter subunit IIA OS=Pectobacterium carotovorum subsp. carotovorum OX=555 GN=KP17_11625 PE=4 SV=1		0	FALSE	10.969	17	2	6	1	169	18.3	4.92														3.5	0					12.08														1
FALSE	High	Master Protein	A0A088AP40	P-type domain-containing protein OS=Apis mellifera OX=7460 PE=3 SV=1		0	FALSE	51.173	13	9	25	9	907	105.2	7.52	3.12		2.88			0					12.87	21.09				2.38	5.96	4.48			3		1			1					5	5
FALSE	High	Master Protein	A0A087ZR59	PUA domain-containing protein OS=Apis mellifera OX=7460 GN=LOC413805 PE=4 SV=1		0	FALSE	13.19	7	3	12	3	517	58.5	9.1		8.66	5.43				5.65				3.77	6.04			2.15							3	2				2				1	3
FALSE	High	Master Protein	A0A088AGW6	PUA domain-containing protein OS=Apis mellifera OX=7460 GN=LOC726009 PE=4 SV=1		0	FALSE	8.456	21	3	4	3	182	20.4	9.23						0										0			2.14							1
FALSE	High	Master Protein	A0A0U6ANN7	Purine nucleoside phosphorylase DeoD-type OS=Serratia marcescens OX=615 GN=deoD PE=3 SV=1		0	FALSE	13.634	10	3	4	3	243	26.3	5.35																				6.44
FALSE	High	Master Protein	A0A087ZWE4	Purple acid phosphatase OS=Apis mellifera OX=7460 GN=LOC413429 PE=3 SV=1		0	FALSE	8.869	3	1	1	1	438	50.9	6.62																	3.76
FALSE	High	Master Protein	V5I100	Putative 60s ribosomal protein l23 apis mellifera (Fragment) OS=Ixodes ricinus OX=34613 PE=2 SV=1		0	FALSE	37.82	46	6	62	1	136	14.2	10.29	17.91	20.02	11.85	9.51	9.16	12.06	15.55	12.78	8.67	9.13	12.37	11.95	7.37	5.46	8.37	3.52	1.79	8.26	13.97		4	4	2	1	1	2	4	3	1	1	2	2	2	1
FALSE	High	Master Protein	A0A0U6C1U7	Putative ABC transporter arginine-binding protein 2 OS=Serratia marcescens OX=615 GN=artI PE=3 SV=1		0	FALSE	25.066	34	6	13	6	243	26.8	7.88																				29.95
FALSE	High	Master Protein	A0A0G3SSN3	Putative aldo-keto reductase OS=Serratia marcescens OX=615 GN=tas_1 PE=4 SV=1		0	FALSE	11.465	9	2	2	2	346	38.4	6.74																				7.23
FALSE	High	Master Protein	I2CLT5	Putative ATP-dependent RNA helicase DDX46-like protein (Fragment) OS=Apis mellifera OX=7460 GN=GB15485 PE=3 SV=1		0	FALSE	4.073	3	1	6	1	301	33.5	8.09	1.62	1.86					2.08				4.82	2.23									1	1					1				1	1
FALSE	High	Master Protein	Q9NAS6	Putative cAMP-dependent protein kinase catalytic subunit OS=Apis mellifera carnica OX=88217 GN=co PE=2 SV=1		0	FALSE	19.58	17	5	19	5	353	40.6	8.81	2.57	1.87	1.95	0	2.61					2.34	1.96	7.18	2.01	2.09			5.6	4.43	1.9		2	1	1	1	1					1	2	2	1	1
FALSE	High	Master Protein	A0A222LPT2	Putative cyclin-dependent serine/threonine-protein kinase OS=Apis mellifera OX=7460 PE=2 SV=1		0	FALSE	57.934	13	13	20	13	1511	175.7	5.25		1.75	1.8				8.02		23.55			4		0			10.16					1	1				2		6			1		1
FALSE	High	Master Protein	A0A1C3HC04	Putative DapA-like lyase OS=Serratia marcescens OX=615 GN=dapAL PE=3 SV=1		0	FALSE	15.426	18	3	4	3	306	33.2	5.54					0															10.31					1
FALSE	High	Master Protein	M9T1J1	Putative elongation factor Tu (Fragment) OS=Lactobacillus apis OX=303541 GN=tuf PE=4 SV=1		0	FALSE	89.233	74	12	71	10	246	27.1	4.89	6.43		40.18		9.91			11.39	20.94		1.89			6.15	26.41			7.01	1.89	54.24	3		7		3			2	4		1			2
FALSE	High	Master Protein	A0A0U6H5E1	Putative glucose-6-phosphate 1-epimerase OS=Serratia marcescens OX=615 GN=yeaD PE=3 SV=1		0	FALSE	8.094	9	2	2	2	291	32	6.74																				4.98
FALSE	High	Master Protein	A0A088A0Q2	Putative GTP cyclohydrolase 1 type 2 OS=Apis mellifera OX=7460 PE=4 SV=1		0	FALSE	46.232	41	7	29	7	274	30.4	6.68	8.35	0	8.92				6.74	5.44			12.84	19.65				2.43		6.23	4.85		3	1	3				3	2			4	6
FALSE	High	Master Protein	A0A088A8F0	Putative H3K9 methyltransferase OS=Apis mellifera OX=7460 PE=4 SV=1		0	FALSE	15.838	6	4	10	4	1026	115.7	8.27	2.65	6	2.01			0						3.6		2.89	2.15	1.85	2.18				1	2	1			1						1		1
FALSE	High	Master Protein	A0A1C3HEP8	Putative NAD(P)H nitroreductase YdjA OS=Serratia marcescens OX=615 GN=ydjA PE=4 SV=1		0	FALSE	6.405	11	2	3	2	183	20.1	6.54																				5.1
FALSE	High	Master Protein	A0A0U6UPW5	Putative outer membrane receptor OS=Serratia marcescens OX=615 GN=ERS381446_05039 PE=3 SV=1		0	FALSE	53.654	20	11	19	11	697	76.5	6.79																				52.73
FALSE	High	Master Protein	V5T7D6	Putative S-layer protein OS=Lactobacillus kimbladii OX=1218506 GN=JF75_08360 PE=4 SV=1		0	FALSE	5.618	1	2	2	2	3402	366.4	5.54			4.4																				2
FALSE	High	Master Protein	A0A221H7T7	Putrescine-binding periplasmic protein OS=Serratia marcescens OX=615 GN=BVG84_06680 PE=3 SV=1		0	FALSE	4	5	1	1	1	347	38.7	5.16																				2.65
FALSE	High	Master Protein	A0A087ZTR2	PWWP domain-containing protein OS=Apis mellifera OX=7460 GN=LOC552332 PE=4 SV=1		0	FALSE	26.947	9	5	11	5	549	62.1	8.07	3						2.78				2.38						5.65	3	1.86		1						2				1
FALSE	High	Master Protein	A0A088AUI8	PWWP domain-containing protein OS=Apis mellifera OX=7460 PE=4 SV=1		0	FALSE	34.143	23	7	54	7	303	34	9.48	18.67	10.54	8.19	5.87	5.77	3.84	17.42	3.95	5.71		20.29	13.95	5.18	4.45	1.72	3.26	3.63	1.68			5	3	3	3	2	2	4	2	2		5	3	2	1
FALSE	High	Master Protein	A0A088AL66	PX domain-containing protein OS=Apis mellifera OX=7460 PE=4 SV=1		0	FALSE	23.347	15	6	15	6	510	57.7	5.27	0	0									2.58					0	2.48	5.4	4.41		1	1									1
FALSE	High	Master Protein	A0A088AC70	Pyr_redox_2 domain-containing protein OS=Apis mellifera OX=7460 PE=4 SV=1		0	FALSE	295.784	58	26	854	26	469	53.3	9.1	198.97	212.32	175.58	45.66	83.4	155.17	168.72	150.03	88.53	45.26	165.45	159.42	142.58	91.51	9.22	75.17	202.64	239.69	111.24		20	22	24	11	16	20	20	19	15	10	20	20	19	17
FALSE	High	Master Protein	A0A088A902	Pyrroline-5-carboxylate reductase OS=Apis mellifera OX=7460 GN=LOC408859 PE=3 SV=1		0.01	FALSE	2.224	6	1	1	1	270	28.5	8.12								1.73																				1
FALSE	High	Master Protein	A0A087ZNH6	Pyruvate carboxylase OS=Apis mellifera OX=7460 GN=LOC412876 PE=4 SV=1		0	FALSE	413.903	58	50	655	50	1196	131.8	6.99	246.95	99.17	88.74	4.49	24.15	88.81	156.2	98.42	50.75	20.61	214.84	166.99	73.66	56.46		109.66	77.37	65.8	47.78		41	22	20	4	10	25	29	24	16	8	39	34	19	19
FALSE	High	Master Protein	A0A088ADD4	Pyruvate carboxyltransferase domain-containing protein OS=Apis mellifera OX=7460 PE=4 SV=1		0.002	FALSE	3.607	4	1	1	1	313	34.4	8.44	3.16																				1
FALSE	High	Master Protein	A0A1B4XNF3	Pyruvate dehydrogenase (Acetyl-transferring) E1 component subunit alpha OS=Enterococcus faecalis OX=1351 GN=pdhA PE=4 SV=1		0	FALSE	4.374	4	1	1	1	371	41.4	5.38																				2.89
FALSE	High	Master Protein	A0A093V615	Pyruvate dehydrogenase E1 component OS=Pectobacterium carotovorum subsp. carotovorum OX=555 GN=aceE PE=4 SV=1		0	FALSE	35.129	12	11	29	1	887	99.7	5.71	2.21				2.23	0			9.07		1.62			11.95	13.26					17.34	1				1	1			3		1			4
FALSE	High	Master Protein	A0A0G3SPY1	Pyruvate dehydrogenase E1 component OS=Serratia marcescens OX=615 GN=aceE_3 PE=4 SV=1		0	FALSE	46.113	16	13	34	3	887	99.5	5.69	2.21				2.23	0			6.73		1.62			11.95	11.26					35.9	1				1	1			2		1			4
FALSE	High	Master Protein	A0A088AA89	Pyruvate dehydrogenase E1 component subunit alpha OS=Apis mellifera OX=7460 GN=LOC551103 PE=4 SV=1		0	FALSE	212.334	68	24	483	24	402	44.5	7.88	196.85	69.97	85.31	48.6	57.45	60.84	87.52	81.76	52.32	41.22	82.95	88.13	72.49	58.1	7.06	57.96	59.64	63.93	36.03		23	11	13	12	12	13	17	15	14	10	14	15	14	14
FALSE	High	Master Protein	A0A088AUU5	Pyruvate dehydrogenase E1 component subunit beta OS=Apis mellifera OX=7460 PE=4 SV=1		0	FALSE	170.638	69	15	442	15	335	36.3	5.44	134.17	63.54	64.18	39.67	34.29	74.94	103.63	88.55	57.97	30.97	104.88	72.91	84.77	52.89	1.88	103.56	129.62	77.59	63.69		15	9	10	9	8	11	12	11	9	6	12	10	10	10
FALSE	High	Master Protein	A0A093SV48	Pyruvate formate-lyase OS=Pectobacterium carotovorum subsp. carotovorum OX=555 GN=KP17_03420 PE=4 SV=1		0	FALSE	65.959	15	9	31	3	760	85	6.09	2.22					1.8			8.82					4.69	10.58					62.27	1					1			2					1
FALSE	High	Master Protein	A0A088A5I8	Pyruvate kinase OS=Apis mellifera OX=7460 PE=3 SV=1		0	FALSE	398.664	61	29	762	29	609	66.5	7.31	294.85	64.63	50.76	45.93	14.66	162.19	44.86	59.05	22.87	70.75	270.17	267.23	82.81	129.76		263.35	146.58	51.34	343.02		25	13	11	12	5	23	12	11	8	13	26	25	14	22
FALSE	High	Master Protein	V5T854	Pyruvate kinase OS=Lactobacillus sp. Hma11N OX=1218505 PE=3 SV=1		0	FALSE	30.934	17	7	8	7	589	62.8	5.2			10.52																	8.57			4
FALSE	High	Master Protein	A0A093SU03	Pyruvate kinase OS=Pectobacterium carotovorum subsp. carotovorum OX=555 GN=KP17_02975 PE=3 SV=1		0	FALSE	44.61	22	6	9	6	470	50.4	6.29						0								3.67						20.83						1								2
FALSE	High	Master Protein	A0A0P0QFN3	Pyruvate kinase OS=Serratia marcescens OX=615 GN=AR325_16740 PE=3 SV=1		0	FALSE	64.745	24	9	17	9	480	51.6	6.96																				55.72
FALSE	High	Master Protein	V5T8R7	Pyruvate oxidase OS=Lactobacillus helsingborgensis OX=1218494 GN=JF73_16910 PE=3 SV=1		0	FALSE	81.81	32	16	44	16	604	67	4.86			36.55					2.09	6.22						19.32			16.86		15.74			11					1	3
FALSE	High	Master Protein	A0A2I2ANQ5	Pyruvate, phosphate dikinase OS=Enterococcus faecalis OX=1351 GN=ppdK PE=4 SV=1		0	FALSE	7.228	1	1	3	1	881	99.1	5.41									2.13					1.94															1					1
FALSE	High	Master Protein	V5T8W4	Pyruvate/2-oxoglutarate dehydrogenase complex dehydrogenase component OS=Lactobacillus mellis OX=1218508 PE=4 SV=1		0	FALSE	87.991	52	12	25	12	336	36.9	5.15								69.06					2.11															12					1
FALSE	High	Master Protein	A0A1Q5W6G4	Quinone oxidoreductase OS=Serratia marcescens OX=615 GN=A8A12_12135 PE=4 SV=1		0	FALSE	6.783	8	2	2	2	325	34.9	6.18																				5.61
FALSE	High	Master Protein	A0A1Q4P3V0	Quinone-dependent D-lactate dehydrogenase OS=Serratia marcescens OX=615 GN=dld PE=3 SV=1		0	FALSE	13.026	7	3	5	3	568	63.7	7.53																				15
FALSE	High	Master Protein	A0A0G3STT3	Quinoprotein glucose dehydrogenase OS=Serratia marcescens OX=615 GN=gcd PE=4 SV=1		0	FALSE	17.669	8	5	7	5	790	85.7	6.43																				19.41
FALSE	High	Master Protein	A0A088AUN5	Rab GDP dissociation inhibitor OS=Apis mellifera OX=7460 GN=Gdi PE=3 SV=1		0	FALSE	75.06	42	11	45	11	442	49.8	5.58	18.21	5.57				4.07	1.68				19.74	44.58	2.1	1.79		0	4.29	1.97	3.83		6	2				3	1				8	9	1	1
FALSE	High	Master Protein	A0A087ZUJ9	Rab proteins geranylgeranyltransferase component A OS=Apis mellifera OX=7460 PE=3 SV=1		0	FALSE	27.795	14	5	10	5	511	57.9	4.84	2.49										5.23	2.87				1.75	2.3		3.71		1										2	1
FALSE	High	Master Protein	A0A088A8F1	Rab-GAP TBC domain-containing protein OS=Apis mellifera OX=7460 GN=RabGAP7 PE=4 SV=1		0.002	FALSE	3.583	3	1	8	1	357	41.6	8.34	1.67	2.02	1.61		0		2.14					2	2.4	0							1	1	1		1		1					1	1	1
FALSE	High	Master Protein	A0A088AE77	RanBD1 domain-containing protein OS=Apis mellifera OX=7460 GN=NUP50 PE=4 SV=1		0	FALSE	16.784	11	4	5	4	527	58	6.83											6.17	3.07							2.01												3	1
FALSE	High	Master Protein	A0A088A9V7	RanGAP1_C domain-containing protein OS=Apis mellifera OX=7460 GN=LOC411909 PE=4 SV=1		0	FALSE	9.516	7	3	7	3	598	65.7	4.88	2.55										5.88	5.69	0								2										2	2	1
FALSE	High	Master Protein	A0A087ZTL5	Receptor expression-enhancing protein OS=Apis mellifera OX=7460 GN=LOC551678 PE=3 SV=1		0	FALSE	30.641	29	4	65	4	178	20.8	8.28	6.33	12.91	5.6	5.64	5.46	6.74	10.01	2.69	2.33	11.45	14.37	12.92	6.51	4.87	5.13	8.56	12.74	8.6	11.72		3	2	2	1	1	2	3	1	1	2	4	3	2	1
FALSE	High	Master Protein	A0A086FPC5	Recombination-associated protein RdgC OS=Serratia marcescens OX=615 GN=rdgC PE=3 SV=1		0.01	FALSE	2.122	3	1	5	1	303	34.1	5.31	2.95				2.21				0						0						1				1				1
FALSE	High	Master Protein	A0A0F6KRT7	Regulator of ribonuclease activity A OS=Serratia marcescens OX=615 GN=rraA PE=3 SV=1		0.004	FALSE	2.789	7	1	2	1	161	17.4	4.26																				4.17
FALSE	High	Master Protein	A0A087ZVF3	Reticulon-like protein OS=Apis mellifera OX=7460 GN=102656074 PE=4 SV=1		0	FALSE	85.845	34	5	242	5	210	23.4	8.25	59.96	81.5	58.24	38.24	39.91	66.05	61.65	32.84	18.46	52.28	48.33	68.29	42.41	16	26.72	94.95	143.09	44.35	49.24	3.4	4	3	4	3	4	4	4	4	3	4	4	5	4	3
FALSE	High	Master Protein	A0A087ZVF0	Reticulon-like protein OS=Apis mellifera OX=7460 PE=4 SV=1		0	FALSE	102.916	78	18	115	18	244	28.2	4.67	40.21	20.15	2.73	1.7	2.69	31.8	27.5	10.93			45.83	8.6	5.5		0	14.02	53.73	5.82	17.48		10	7	1	1	1	10	9	5			13	3	2
FALSE	High	Master Protein	A0A087ZYK5	RF_PROK_I domain-containing protein OS=Apis mellifera OX=7460 GN=LOC410376 PE=4 SV=1		0	FALSE	7.383	11	2	13	2	198	23	9.86	2.79	2.5	2.4		2.12	0		2.49				0	2.61			1.88					2	2	2		1	1		1				1	2
FALSE	High	Master Protein	Q38SD4	Rh-like protein OS=Apis mellifera OX=7460 PE=2 SV=1		0	FALSE	21.498	12	5	11	5	471	51.5	6.58						0			2.99		5.11		10.39						0							1			1		2		2
FALSE	High	Master Protein	A0A2G4QVB8	Riboflavin synthase OS=Serratia marcescens OX=615 GN=CS370_08405 PE=4 SV=1		0	FALSE	8.381	8	1	1	1	216	23.5	5.99																				4.1
FALSE	High	Master Protein	A0A2G4P4W0	Ribonuclease E OS=Serratia marcescens OX=615 GN=rne PE=3 SV=1		0	FALSE	11.896	3	3	3	3	1121	123.2	5.5																				9.68
FALSE	High	Master Protein	A0A0P0Q9I6	Ribonuclease R OS=Serratia marcescens OX=615 GN=rnr PE=3 SV=1		0	FALSE	18.585	9	5	5	5	824	93	8.75																				14.36
FALSE	High	Master Protein	A0A1Q4P1Q9	Ribonucleoside-diphosphate reductase OS=Serratia marcescens OX=615 GN=BHU62_08300 PE=3 SV=1		0	FALSE	15.539	7	4	5	1	762	86.2	6.28															2.34					8.97
FALSE	High	Master Protein	A0A2G4Q8Y1	Ribonucleoside-diphosphate reductase OS=Serratia marcescens OX=615 GN=CS371_25610 PE=3 SV=1		0.004	FALSE	2.935	1	1	1	1	714	81.4	6.62																				2.38
FALSE	High	Master Protein	A0A0A5LT83	Ribonucleoside-diphosphate reductase OS=Serratia marcescens OX=615 GN=nrdA PE=3 SV=1		0	FALSE	17.333	7	4	5	1	762	86.2	6.35															2.34					9.96
FALSE	High	Master Protein	A0A0U6Z3L5	Ribonucleoside-diphosphate reductase subunit beta OS=Serratia marcescens OX=615 GN=nrdF PE=3 SV=1		0.009	FALSE	2.266	3	1	1	1	323	36.7	4.93																				1.96
FALSE	High	Master Protein	A0A088AQW4	Ribonucloprotein OS=Apis mellifera OX=7460 GN=102655272 PE=3 SV=1		0	FALSE	5.373	9	1	7	1	127	13.9	7.85	3.33	3.23				3.08	3.18	2.75				6.23									1	1				1	1	1				1
FALSE	High	Master Protein	A0A088AFB1	Ribos_L4_asso_C domain-containing protein OS=Apis mellifera OX=7460 GN=RpL4 PE=4 SV=1		0	FALSE	154.665	43	18	364	17	429	48.3	11.53	65.33	81.18	64.82	35.84	47.48	24.62	76.66	38.01	27.54	23.82	57.99	51.63	70.11	23.17	35.87	18.85	58.32	39.16	24.55		13	15	13	11	10	8	13	10	10	7	11	12	15	9
FALSE	High	Master Protein	A0A0P0QHP8	Ribose 5-phosphate isomerase B OS=Serratia marcescens OX=615 GN=AR325_21010 PE=4 SV=1		0	FALSE	15.554	28	3	8	3	152	16.5	6.79																				21.98
FALSE	High	Master Protein	A0A2G5S176	Ribose-5-phosphate isomerase A OS=Serratia marcescens OX=615 GN=rpiA PE=3 SV=1		0	FALSE	7.932	12	2	5	2	218	22.8	5.83														5.21	0					5.88														1
FALSE	High	Master Protein	A0A086FFP2	Ribose-phosphate pyrophosphokinase OS=Serratia marcescens OX=615 GN=prs PE=3 SV=1		0	FALSE	48.288	39	9	22	9	315	34.2	5.59									8.96					15.02	12.08					29.96									3					4
FALSE	High	Master Protein	A0A087ZZ05	Ribosomal protein L15 OS=Apis mellifera OX=7460 GN=RpL15 PE=3 SV=1		0	FALSE	45.507	31	6	117	6	204	23.9	11.6	29.87	35.72	25.6	11.01	13.45	5.73	23.62	10.54	8.76	8.32	9.98	13.51	17.3	12.22	8.38	3.6	8.26	2.23	1.85		5	6	4	3	3	2	5	3	3	3	3	4	5	3
FALSE	High	Master Protein	X2JFT9	Ribosomal protein L19 OS=Apis mellifera OX=7460 GN=rpl19 PE=2 SV=1		0	FALSE	47.244	31	6	113	6	200	23.6	11.22	18.77	23.17	8.75	8.5	12.16	14.05	16.01	7.98	11.07	2.89	26.62	13.03	11.49	3.82	4.15	13.76	13.44	11.69	12.74		4	5	2	3	4	4	5	3	3	2	6	5	5	3
FALSE	High	Master Protein	A0A088AA42	Ribosomal_L16 domain-containing protein OS=Apis mellifera OX=7460 GN=mRpL16 PE=4 SV=1		0	FALSE	7.442	10	2	14	2	240	28.1	10.02	5.87	3.37	4.79		5.17	2.64	3.16	5.11		2.29	3.03				0						2	1	2		2	1	1	2		1	1
FALSE	High	Master Protein	A0A087ZQ36	Ribosomal_L16 domain-containing protein OS=Apis mellifera OX=7460 GN=RpL10 PE=4 SV=1		0	FALSE	57.23	42	8	131	8	219	25	10.02	22.98	31.02	16.22	10.14	11.43	10.73	32.64	12.19	7.6	13.33	33.15	26.16	29.37	9.13	13.97	11.42	10.14	9.04	7.45		6	6	5	3	3	4	6	5	3	5	6	7	6	3
FALSE	High	Master Protein	A0A088AL09	Ribosomal_L18_c domain-containing protein OS=Apis mellifera OX=7460 GN=RpL5 PE=3 SV=1		0	FALSE	91.542	52	12	160	12	298	34.3	9.69	38.39	30.61	26.03	23.13	29.05	19.09	40.26	25.82	7.02	4.43	30.72	27.76	32.71	5.03	10.74	9.77	20.91	22.08	15.31		6	8	4	4	6	4	7	6	2	1	6	5	6	2
FALSE	High	Master Protein	A0A088A2E6	Ribosomal_L18e/L15P domain-containing protein OS=Apis mellifera OX=7460 GN=mRpL15 PE=3 SV=1		0	FALSE	38.984	32	7	41	7	293	33.7	9.07	11.02	10.16	2.63	1.91	2.26		10.2	0		7.57	7.16	3.12	3.86			6.57	8.93	6.41	5.08		4	3	1	2	1		3	1		2	3	1	1
FALSE	High	Master Protein	A0A088AIL2	Ribosomal_L18e/L15P domain-containing protein OS=Apis mellifera OX=7460 GN=RpL27A PE=3 SV=1		0	FALSE	39.313	29	6	99	6	147	16.7	10.54	16.16	31.91	19.65	7.54	17.28	5.02	20.11	8.65	5.94	13.47	18.67	14.21	22.83	5.14	7.64	2.22	22.05	8.01	6.96		3	5	4	2	4	2	3	2	1	3	4	3	4	3
FALSE	High	Master Protein	A0A088AGE9	Ribosomal_L2_C domain-containing protein OS=Apis mellifera OX=7460 GN=mRpL2 PE=4 SV=1		0	FALSE	8.744	10	2	2	2	310	34.5	10.02																2.16	2.69
FALSE	High	Master Protein	A0A088ABL2	Ribosomal_L2_C domain-containing protein OS=Apis mellifera OX=7460 GN=RpL8 PE=3 SV=1		0	FALSE	82.551	44	9	118	9	257	28.1	10.92	23.93	32.37	6.66	5.26	2.47	7.83	34.82	21.53	8.45	4.42	32.83	34.59	14.96	14.21	9.19	2.56	9.5	5.15	5.79		5	8	2	1	1	3	7	6	2	2	8	9	4	4
FALSE	High	Master Protein	A0A088AJK1	Ribosomal_L23eN domain-containing protein OS=Apis mellifera OX=7460 GN=RpL23A PE=3 SV=1		0	FALSE	47.399	38	10	110	10	241	26.6	10.73	15.18	14.71	9.93	6.17	5.08	8.23	15.42	10.06	4.24	2.66	15.07	8.21	18.79	6.08	13.66	10.71	16.09	13.03	10.82		5	4	3	3	4	3	5	3	4	1	5	4	5	2
FALSE	High	Master Protein	A0A088ALQ3	Ribosomal_L28e domain-containing protein OS=Apis mellifera OX=7460 GN=RpL28 PE=4 SV=1		0	FALSE	23.128	38	5	48	5	138	15.7	11.31	15.49	16.36	11.39	3.82	6.02	2.13	14.27				3.98	4.15	2.45	1.86	7.18	2.14		0	2.02		3	4	4	2	3	1	3				1	2	2	2
FALSE	High	Master Protein	A0A088AW92	Ribosomal_L30 domain-containing protein OS=Apis mellifera OX=7460 GN=mRpL30 PE=4 SV=1		0	FALSE	8.655	13	2	7	2	177	20.7	9.8	5.02															0	2.34	4.21	0		2
FALSE	High	Master Protein	A0A088A8Q3	Ribosomal_L6e_N domain-containing protein OS=Apis mellifera OX=7460 GN=RpL6 PE=4 SV=1		0	FALSE	114.981	47	15	207	15	274	31.8	10.48	48.95	56.79	41.07	6.17	23.61	19.67	58.04	20.91	15.11	21.13	39	44.25	52.22	27.88	8.33	10.43	14.56	13.84	18.13		13	11	7	4	6	7	10	6	7	6	8	8	8	6
FALSE	High	Master Protein	A0A088AHA4	Ribosomal_L7Ae domain-containing protein OS=Apis mellifera OX=7460 GN=RpL30 PE=3 SV=1		0	FALSE	36.144	57	6	59	6	114	12.5	9.83	21.26	21.13	13.52	2.82	10.33	10.3	12.45	6.26	4.25	10.74	11.23	14.01	14.53	6.22	5.41	5.52	6.91	3.16	5.27	2.07	3	4	2	1	4	3	4	2	1	3	3	4	4	2
FALSE	High	Master Protein	A0A088A266	Ribosomal_L7Ae domain-containing protein OS=Apis mellifera OX=7460 GN=RpL7A PE=4 SV=1		0	FALSE	75.626	47	13	124	13	268	30.4	10.61	17.74	25.21	7.34	5.04	5.66	12.42	17.16	4.03	4.14	6.39	26.55	12.72	16.43	12.94	4.46	12.2	36.09	23.99	30.67		6	8	3	3	2	6	6	2	2	2	8	4	6	5
FALSE	High	Master Protein	A0A088ADB0	Ribosomal_L7Ae domain-containing protein OS=Apis mellifera OX=7460 PE=4 SV=1		0.006	FALSE	2.496	7	1	2	1	150	17.1	8.57																0		2.29
FALSE	High	Master Protein	A0A088AB54	RIBOSOMAL_L9 domain-containing protein OS=Apis mellifera OX=7460 GN=LOC725866 PE=4 SV=1		0	FALSE	11.549	12	3	9	3	271	31.9	9.47	5.1	0	0														5.9	0	2.22		2	1	1
FALSE	High	Master Protein	A0A087ZVW5	Ribosomal_S10 domain-containing protein OS=Apis mellifera OX=7460 GN=LOC409129 PE=4 SV=1		0	FALSE	12.817	11	2	5	2	214	24.7	7.61											2.38					4.41	3.65		2.12												1
FALSE	High	Master Protein	A0A087ZP66	Ribosomal_S10 domain-containing protein OS=Apis mellifera OX=7460 GN=mRpL48 PE=4 SV=1		0	FALSE	15.88	26	3	8	3	175	20.7	9.06	2.89	3.14	2.18		0						4.8	4.02				0					1	1	1		1						2	1
FALSE	High	Master Protein	A0A087ZP70	Ribosomal_S10 domain-containing protein OS=Apis mellifera OX=7460 GN=RpS20 PE=3 SV=1		0	FALSE	49.29	32	3	102	3	121	13.7	9.94	17.07	15.15	12.53	10.93	17.1	16.43	16.91	8.32	16.88	10.19	18.54	17.06	11.51	10.64	10.98	15.18	22.96	22.59	19.05	5.61	3	3	2	2	3	2	1	1	3	1	3	1	2	3
FALSE	High	Master Protein	A0A088A667	Ribosomal_S10 domain-containing protein OS=Apis mellifera OX=7460 PE=3 SV=1		0	FALSE	6.014	21	2	2	2	103	11.9	9.7															3.92
FALSE	High	Master Protein	A0A087ZQ43	Ribosomal_S13_N domain-containing protein OS=Apis mellifera OX=7460 GN=RpS13 PE=3 SV=1		0	FALSE	40.494	36	5	179	5	151	17.2	10.36	26.8	28.3	21.29	10.88	15.6	12.28	21.46	20.93	12.5	19.48	24.71	17.69	27.89	13.39	16.93	14.72	10.07	8.66	6.5		5	5	4	3	4	3	4	4	5	4	5	5	5	5
FALSE	High	Master Protein	A0A088A637	Ribosomal_S17_N domain-containing protein OS=Apis mellifera OX=7460 GN=RpS11 PE=3 SV=1		0	FALSE	42.368	47	9	115	9	155	18.1	10.93	24.86	21.8	10.71	10.82	13.47	10.54	28.02	11.14	11.67	11.99	31.76	18.03	18.21	8.73	7.42	2.02	7.79	2.1	6.22		7	7	4	4	5	4	7	5	5	4	8	5	5	5
FALSE	High	Master Protein	A0A088AEQ9	Ribosomal_S7 domain-containing protein OS=Apis mellifera OX=7460 GN=mRpS7 PE=3 SV=1		0	FALSE	17.081	20	4	18	4	227	26.8	9.69	4.84	2.11	0	1.74	1.69		1.7	1.89			2.44		5.26			2.33	2.75	2.56			2	1	2	1	1		1	1			1		3
FALSE	High	Master Protein	A0A088A389	Ribosomal_S7 domain-containing protein OS=Apis mellifera OX=7460 GN=RpS5a PE=3 SV=1		0	FALSE	102.136	49	11	222	11	216	24.1	9.45	32.15	34.37	33.54	25.33	30.91	25.98	35.82	29.67	21.6	19.55	33.2	25.93	31.51	16.52	15.09	10.28	25.58	38.37	23.71	6.69	7	7	6	5	7	4	6	6	6	5	6	7	8	5
FALSE	High	Master Protein	A0A1B4XPC8	Ribosome hibernation promoting factor OS=Enterococcus faecalis OX=1351 GN=raiA PE=3 SV=1		0.002	FALSE	3.343	7	1	5	1	183	21.1	6.11			0						0					0	0								1						1					1
FALSE	High	Master Protein	A0A1Q4P2H4	Ribosome-binding factor A OS=Serratia marcescens OX=615 GN=rbfA PE=3 SV=1		0.008	FALSE	2.321	7	1	1	1	136	15.2	6.18																				2.27
FALSE	High	Master Protein	A0A221HEQ3	Ribulose-phosphate 3-epimerase OS=Serratia marcescens OX=615 GN=BVG84_20145 PE=3 SV=1		0.002	FALSE	3.455	8	1	1	1	225	24.4	5.77																				3.19
FALSE	High	Master Protein	A0A088A2L6	RIC3 domain-containing protein OS=Apis mellifera OX=7460 PE=4 SV=1		0	FALSE	7.548	4	2	3	2	718	81.5	5.24										6.47																				2
FALSE	High	Master Protein	A0A088ACS4	Rieske domain-containing protein OS=Apis mellifera OX=7460 PE=4 SV=1		0	FALSE	19.118	12	4	14	4	586	65.6	7.55	0	3.96	2.04			3.64	7.74				4.42		3.74								1	2	3			2	3				1		1
FALSE	High	Master Protein	A0A087ZS66	RING-CH-type domain-containing protein OS=Apis mellifera OX=7460 PE=4 SV=1		0.006	FALSE	2.643	2	1	1	1	614	69.8	4.97			1.68																				1
FALSE	High	Master Protein	A0A088A2T3	RING-CH-type domain-containing protein OS=Apis mellifera OX=7460 PE=4 SV=1		0.01	FALSE	2.196	3	1	1	1	397	44.3	7.58																	1.88
FALSE	High	Master Protein	A0A088AVT4	RING-type domain-containing protein OS=Apis mellifera OX=7460 GN=LOC408751 PE=4 SV=1		0	FALSE	5.017	9	1	2	1	182	20.5	6.74																	3.05		0
FALSE	High	Master Protein	A0A088APU7	RING-type domain-containing protein OS=Apis mellifera OX=7460 GN=LOC409295 PE=4 SV=1		0	FALSE	5.768	7	1	5	1	340	38.1	7.94	0		2.21		2.57		2.65	2.29													1		1		1		1	1
FALSE	High	Master Protein	A0A088AC30	RING-type domain-containing protein OS=Apis mellifera OX=7460 GN=LOC410740 PE=4 SV=1		0	FALSE	6.962	4	2	5	2	338	39.3	8.03	0	2.27	0		2.14					0											1	1	1		1					1
FALSE	High	Master Protein	A0A087ZTA3	RING-type domain-containing protein OS=Apis mellifera OX=7460 GN=LOC411081 PE=4 SV=1		0.002	FALSE	3.249	3	1	1	1	320	36.3	8.03												2.79																				1
FALSE	High	Master Protein	A0A088AFC8	RING-type domain-containing protein OS=Apis mellifera OX=7460 GN=Trc8 PE=4 SV=1		0	FALSE	5.488	2	1	4	1	661	75.8	7.03	0						1.96					0	2.33								1						1					1	1
FALSE	High	Master Protein	A0A093STE1	RNA chaperone ProQ OS=Pectobacterium carotovorum subsp. carotovorum OX=555 GN=proQ PE=3 SV=1		0	FALSE	6.189	8	2	2	2	247	27.5	9.89																				5.23
FALSE	High	Master Protein	A0A2G4Q738	RNA polymerase sigma factor RpoD OS=Serratia marcescens OX=615 GN=rpoD PE=3 SV=1		0	FALSE	14.526	8	4	4	4	613	70.1	4.81															3.59					5.98
FALSE	High	Master Protein	A0A088AC57	RNA-binding protein 8A OS=Apis mellifera OX=7460 GN=tsu PE=3 SV=1		0	FALSE	11.386	14	1	1	1	166	19	5.1																	3.66
FALSE	High	Master Protein	A0A1Q5W4H6	RNA-binding protein Hfq OS=Serratia marcescens OX=615 GN=hfq PE=3 SV=1		0	FALSE	9.643	22	2	10	2	102	11.3	7.65	2.53				2.17				1.9					4.27	0					11.14	1				1				1					1
FALSE	High	Master Protein	A0A088ANL1	RNase III domain-containing protein OS=Apis mellifera OX=7460 GN=mRpL44 PE=4 SV=1		0	FALSE	21.863	18	3	31	3	313	35.6	8.72	15.93	11.85	7.47	5.24	6.49	5.39	7.01	6.27	2.23	8.03	5.17	5.91	7.36	0	2.07						3	1	1	1	1	1	1	1	1	1	1	1	1	1
FALSE	High	Master Protein	A0A0F6KPY8	Rod shape-determining protein OS=Serratia marcescens OX=615 GN=mreB PE=4 SV=1		0	FALSE	17.304	20	5	8	5	347	37	5.26														5.06	6.24					10.33														2
FALSE	High	Master Protein	A0A088A9Z3	RPN13_C domain-containing protein OS=Apis mellifera OX=7460 GN=LOC413299 PE=4 SV=1		0	FALSE	46.453	31	8	22	8	399	43.2	5.63	11.12	1.75			1.73	3.7	2.11				17.11	1.96		1.86		5.73	3.8	3.75	2.77		3	1			1	1	1				6	1		1
FALSE	High	Master Protein	A0A088AIM4	RPN2_C domain-containing protein OS=Apis mellifera OX=7460 PE=4 SV=1		0	FALSE	37.996	26	7	25	7	364	40.8	6.33	6.1	3.61	2.46			2.52	8.73	2.92			9.58	6.47	5.8			0	6.22	3.37	5.71		2	1	1			2	2	1			3	2	2
FALSE	High	Master Protein	A0A088AS20	RRF domain-containing protein OS=Apis mellifera OX=7460 PE=4 SV=1		0	FALSE	27.953	37	5	10	5	259	30.7	9.23	2.54	2.4				5.22	5.03									0		2.45			2	1				2	3
FALSE	High	Master Protein	A0A088A2F5	RRM domain-containing protein OS=Apis mellifera OX=7460 GN=100578161 PE=4 SV=1		0	FALSE	17.799	14	4	10	4	451	52.4	9.36		2.77					2.98				4.5		0				0					1					3				3		1
FALSE	High	Master Protein	A0A088A8P7	RRM domain-containing protein OS=Apis mellifera OX=7460 GN=413835 PE=4 SV=1		0	FALSE	28.877	26	5	23	5	193	22.5	11.5	2.26	4.44	0			0	2.35			2.3	8.52	2.24				1.85	6.44	7.66	9.27		1	2	1			1	2			1	3	1
FALSE	High	Master Protein	A0A088AKG6	RRM domain-containing protein OS=Apis mellifera OX=7460 GN=Imp PE=4 SV=1		0	FALSE	70.579	24	10	51	10	576	62.4	8.92	11.36	11.97	6.25		2.04	3.56	2.77		0	3.95	16.36	12.51	8.71	6.79		2.17	17.52	10.17	5.16		4	4	4		1	2	1		1	2	5	5	3	3
FALSE	High	Master Protein	A0A087ZY55	RRM domain-containing protein OS=Apis mellifera OX=7460 GN=LOC409065 PE=4 SV=1		0	FALSE	11.938	6	3	13	3	464	54.5	6.57	2.79	2.44				0	2.51	2.34	2.12		4.41	4.65	2.31	2.27							1	2				1	1	1	1		1	1	1	1
FALSE	High	Master Protein	A0A088AKG9	RRM domain-containing protein OS=Apis mellifera OX=7460 GN=LOC409379 PE=4 SV=1		0	FALSE	8.83	7	1	1	1	274	29.9	9.32																	3.46
FALSE	High	Master Protein	A0A088A7J9	RRM domain-containing protein OS=Apis mellifera OX=7460 GN=LOC409486 PE=4 SV=1		0	FALSE	13.036	11	2	3	2	416	43.1	8.56	2.42										4.49	2.36									1										1	1
FALSE	High	Master Protein	A0A088ADR8	RRM domain-containing protein OS=Apis mellifera OX=7460 GN=LOC409560 PE=4 SV=1		0	FALSE	5.869	3	1	1	1	502	57.4	8.47											3.33																				1
FALSE	High	Master Protein	A0A088AM73	RRM domain-containing protein OS=Apis mellifera OX=7460 GN=LOC409862 PE=4 SV=1		0.01	FALSE	2.122	5	1	3	1	176	20.9	11.74	1.79										1.71		0								1										1		1
FALSE	High	Master Protein	A0A087ZZC6	RRM domain-containing protein OS=Apis mellifera OX=7460 GN=Pabp2 PE=4 SV=1		0	FALSE	14.341	14	2	5	2	228	25.7	5.97																	3.11	5.33	4.37
FALSE	High	Master Protein	A0A087ZY56	RRM domain-containing protein OS=Apis mellifera OX=7460 PE=4 SV=1		0	FALSE	26.008	22	4	17	4	282	29.5	6.52	0					0		2.75			7.43	6.42	0	4.36			2.72	0	0		2					1		1			3	2	1	2
FALSE	High	Master Protein	A0A088A1R1	RRM domain-containing protein OS=Apis mellifera OX=7460 PE=4 SV=1		0	FALSE	7.401	12	2	8	2	163	18.9	8.65	0						2.01				1.93		2.02			4.56			3.75		1						1				1		1
FALSE	High	Master Protein	A0A088A1R3	RRM domain-containing protein OS=Apis mellifera OX=7460 PE=4 SV=1		0	FALSE	17.538	17	4	9	4	241	27.9	11.78	7.83	5.66									7.73	2.74						3.45			2	2									2	1
FALSE	High	Master Protein	A0A088A412	RRM domain-containing protein OS=Apis mellifera OX=7460 PE=4 SV=1		0	FALSE	38.17	13	8	19	8	816	89.7	9.29	2.83	9.35	2.42				7.07				3.69	0	3.16			2.11	5	2.66	3.04		1	4	1				3				1	1	2
FALSE	High	Master Protein	A0A088A8G8	RRM domain-containing protein OS=Apis mellifera OX=7460 PE=4 SV=1		0	FALSE	12.807	7	2	3	2	486	55.9	10.96							3.45				3.51						2.33										1				1
FALSE	High	Master Protein	A0A088ABW1	RRM domain-containing protein OS=Apis mellifera OX=7460 PE=4 SV=1		0	FALSE	12.688	16	3	7	3	272	30.2	9.95	2.08					4.2					2.15	5.48									2					1					1	2
FALSE	High	Master Protein	A0A088ABX8	RRM domain-containing protein OS=Apis mellifera OX=7460 PE=4 SV=1		0	FALSE	12.255	10	4	14	4	484	56.7	5.57		3.12	2.32			2.41	4.78	0			3.32	3.89					2.19		2.26			2	1			2	2	1			1	2
FALSE	High	Master Protein	A0A088ADR9	RRM domain-containing protein OS=Apis mellifera OX=7460 PE=4 SV=1		0	FALSE	3.946	6	1	9	1	178	19.7	9.23	1.8	1.96									2.19	0	1.63			1.81	2.07	2.41	0		1	1									1	1	1
FALSE	High	Master Protein	A0A088AH65	RRM domain-containing protein OS=Apis mellifera OX=7460 PE=4 SV=1		0	FALSE	19.437	20	4	15	4	247	26.7	11.06	2.66			2.11				2.17					0	0		2.22	4.89	8.59	5.18		2			1				1					1	1
FALSE	High	Master Protein	A0A087ZSJ5	RuvB-like helicase OS=Apis mellifera OX=7460 GN=pontin PE=3 SV=1		0	FALSE	21.071	12	4	13	4	456	50	6.76		3.15	2.19		2.38	2.63	3.12				8.52	8.15	2.33						2.11			1	1		1	1	1				2	3	1
FALSE	High	Master Protein	A0A088ARN2	RuvB-like helicase OS=Apis mellifera OX=7460 GN=Reptin PE=3 SV=1		0	FALSE	4.736	5	2	2	2	462	51.4	5.54		1.95																	1.85			1
FALSE	High	Master Protein	A0A088ANA3	S-(hydroxymethyl)glutathione dehydrogenase OS=Apis mellifera OX=7460 GN=Fdh PE=3 SV=1		0	FALSE	33.198	14	5	25	5	377	40.4	7.28	5.61	5.94	2.81		2.29	2.97	3.19			2.87	9.03	13.85	7.28	3.21					5.83		1	1	1		1	1	1			1	1	3	1	1
FALSE	High	Master Protein	A0A087ZNQ6	S1 motif domain-containing protein OS=Apis mellifera OX=7460 PE=4 SV=1		0	FALSE	10.804	13	3	5	3	282	31.6	4.75		2.76									2.58	6.02				1.86						1									1	2
FALSE	High	Master Protein	A0A088AB73	S1 motif domain-containing protein OS=Apis mellifera OX=7460 PE=4 SV=1		0	FALSE	37.984	17	8	48	8	747	83.8	8.65	10.73	12.73	9.52	0	4.64	6.89	10.43	5.35	5.11		6.02	3.25	5.7	6.64	1.99	1.94	7.69	5.07	2.19		4	5	4	1	2	3	4	2	2		3	1	2	4
FALSE	High	Master Protein	A0A088AHT2	S10_plectin domain-containing protein OS=Apis mellifera OX=7460 GN=LOC409552 PE=4 SV=1		0	FALSE	67.112	47	8	181	8	159	17.9	9.83	40.02	28.72	32.35	25.48	22.87	18.29	38.05	19.93	29.45	23.92	40.85	17.16	26.8	23.41	14.6	5.38	11.74	11.24	12.43		6	3	4	4	4	4	7	4	6	4	6	3	3	3
FALSE	High	Master Protein	A0A088AC67	S4 RNA-binding domain-containing protein OS=Apis mellifera OX=7460 GN=RpS9 PE=3 SV=1		0	FALSE	52.677	53	15	249	15	193	22.5	10.74	24.72	29.02	31.71	17.5	23.1	21.57	32.9	24.52	22.66	20.82	29.79	20.91	34.84	27.58	23.88	17.59	28.77	25.72	25.84	8.54	8	11	12	10	9	7	11	12	10	6	9	10	12	11
FALSE	High	Master Protein	A0A088AW12	S4 RNA-binding domain-containing protein OS=Apis mellifera OX=7460 PE=4 SV=1		0.004	FALSE	2.743	6	1	1	1	156	18.2	5.72	2.62																				1
FALSE	High	Master Protein	A0A087ZQV2	S5 DRBM domain-containing protein OS=Apis mellifera OX=7460 GN=RpS2 PE=3 SV=1		0	FALSE	164.248	58	18	334	18	280	30.3	10.13	72.98	87.67	44.41	25.47	45.44	41.79	86.92	45.57	25.19	26.26	60.33	64.43	71.72	30.65	26.4	15.44	38.87	17.6	21.94		14	16	12	9	9	11	16	12	6	10	11	15	14	10
FALSE	High	Master Protein	A0A087ZZ41	SAC domain-containing protein OS=Apis mellifera OX=7460 GN=Sac1 PE=4 SV=1		0.002	FALSE	3.526	2	1	1	1	584	67.3	8.57							2.14																				1
FALSE	High	Master Protein	A0A088AL97	Sacchrp_dh_NADP domain-containing protein OS=Apis mellifera OX=7460 PE=4 SV=1		0	FALSE	183.355	65	24	482	24	422	47.4	8.37	105.55	131.11	94.11	45.58	75.28	44.17	98.23	38.1	22.67	51.21	77.27	76.98	70.85	29.84	30.64	29.95	53.47	62.82	30.25	2.72	18	21	16	13	16	13	19	10	8	12	17	19	14	10
FALSE	High	Master Protein	A0A087EQE2	S-adenosylmethionine synthase OS=Lactobacillus kunkeei OX=148814 GN=metK PE=3 SV=1		0	FALSE	8.543	6	2	3	2	395	43.1	5.15															1.95					7.39
FALSE	High	Master Protein	A0A0P0QIS1	S-adenosylmethionine synthase OS=Serratia marcescens OX=615 GN=metK PE=3 SV=1		0	FALSE	17.631	17	5	7	5	384	41.9	5.2														0	7.59					8.39														1
FALSE	High	Master Protein	A0A088A327	SAM domain-containing protein OS=Apis mellifera OX=7460 GN=Stim PE=4 SV=1		0.008	FALSE	2.411	1	1	8	1	687	76.2	5.94	3.57	2.02	2.04	0	2.13	1.95	2.17														1	1	1	1	1	1	1
FALSE	High	Master Protein	A0A088A156	SAM_MT_RSMB_NOP domain-containing protein OS=Apis mellifera OX=7460 GN=LOC410262 PE=3 SV=1		0.006	FALSE	2.556	2	1	1	1	607	69.3	7.99							1.62																				1
FALSE	High	Master Protein	A0A088AK82	SAM-dependent MTase TRM10-type domain-containing protein OS=Apis mellifera OX=7460 PE=4 SV=1		0	FALSE	29.872	16	6	35	6	387	46.5	9.47	6	16.72	7.95	5.19	5.75		10.37	5.76	1.96	3.12	0	0	8.79	2.02	1.82				1.93		2	4	3	2	2		3	2	1	1	1	1	3	1
FALSE	High	Master Protein	A0A088A896	SAP domain-containing protein OS=Apis mellifera OX=7460 GN=LOC551151 PE=4 SV=1		0.008	FALSE	2.326	4	1	1	1	248	27.9	9.09	1.69																				1
FALSE	High	Master Protein	A0A088AT50	SBP_bac_5 domain-containing protein OS=Apis mellifera OX=7460 PE=4 SV=1		0.007	FALSE	2.447	10	1	1	1	250	28.7	8.92			0																				1
FALSE	High	Master Protein	A0A088A791	SCD domain-containing protein OS=Apis mellifera OX=7460 PE=4 SV=1		0	FALSE	4.57	2	2	3	2	1108	127.8	5.9											0	1.76	1.82																		1	1	1
FALSE	High	Master Protein	A0A088AIP8	SCP2 domain-containing protein OS=Apis mellifera OX=7460 GN=LOC552717 PE=4 SV=1		0	FALSE	92.745	53	15	92	15	413	45.2	8.53	26.76	21.45	14.68	1.99		17.63	20.27	11.46	3.35	10.21	28.83	16.36	4.82	10.36		2.53	13.09	12.74	11.3		8	7	4	2		6	5	4	1	3	7	5	2	5
FALSE	High	Master Protein	A0A088AK33	Sec16_C domain-containing protein OS=Apis mellifera OX=7460 PE=4 SV=1		0	FALSE	5.069	1	1	2	1	2506	287.8	5.64			0										0										1										1
FALSE	High	Master Protein	A0A221HGB2	Sec-independent protein translocase protein TatA OS=Serratia marcescens OX=615 GN=tatA PE=3 SV=1		0.006	FALSE	2.629	13	1	1	1	87	9.2	6.73																				1.67
FALSE	High	Master Protein	A0A087ZN54	Secretory carrier-associated membrane protein OS=Apis mellifera OX=7460 GN=Scamp PE=3 SV=1		0	FALSE	23.969	8	2	6	2	354	39.4	7.25							3.17				2.85						0	3.02	6.99								1				1
FALSE	High	Master Protein	A0A088ATJ3	Sema domain-containing protein OS=Apis mellifera OX=7460 PE=4 SV=1		0	FALSE	6.223	1	1	13	1	1915	214.1	6.48	2.46	5.46	2.27		2.47		3.31	2.61		3.12	5.59	3.09	3.28								1	1	1		1		1	1		1	1	1	1
FALSE	High	Master Protein	A0A221DQ74	Serine 3-dehydrogenase OS=Serratia marcescens OX=615 GN=BVG97_09210 PE=4 SV=1		0	FALSE	8.922	6	2	3	1	479	52	4.79																				9.95
FALSE	High	Master Protein	A0A088AQX9	Serine hydroxymethyltransferase OS=Apis mellifera OX=7460 GN=LOC411796 PE=3 SV=1		0	FALSE	38.301	20	10	44	10	522	58.6	8.72	10.3	8.5				0	8.71	6.69			8.46	13.62	4.26	0		2.06	2.56	1.96	0		4	5				1	3	3			5	7	3	1
FALSE	High	Master Protein	A0A1Q4NYM7	Serine hydroxymethyltransferase OS=Serratia marcescens OX=615 GN=glyA PE=3 SV=1		0	FALSE	17.582	17	4	6	4	417	45.4	6.71									1.92					0	2.03					11.36									1					1
FALSE	High	Master Protein	A0A093SDH5	Serine/threonine protein kinase OS=Pectobacterium carotovorum subsp. carotovorum OX=555 GN=KP17_17120 PE=4 SV=1		0	FALSE	37.208	14	7	13	1	644	74.1	5.77									2.25					2.41	4.57					23.8									1					1
FALSE	High	Master Protein	A0A087ZUP4	Serine/threonine protein phosphatase 2A regulatory subunit OS=Apis mellifera OX=7460 GN=LOC408949 PE=3 SV=1		0	FALSE	11.754	7	3	4	1	564	65.9	6.46	0									1.64							6.65				1									1
FALSE	High	Master Protein	A0A088AB82	Serine/threonine protein phosphatase 2A regulatory subunit OS=Apis mellifera OX=7460 PE=3 SV=1		0	FALSE	34.869	22	8	16	6	474	55.4	7.47										1.64	3.8	2.06		0		1.78	11.74	8.57	0											1	2	1		1
FALSE	High	Master Protein	A0A088AUP5	Serine/threonine-protein phosphatase OS=Apis mellifera OX=7460 GN=LOC409430 PE=3 SV=1		0	FALSE	27.96	25	6	22	6	329	37.4	6.76	13.22						11.64				10.83	8.61	5.7			0	2.15				5						5				4	3	2
FALSE	High	Master Protein	A0A088A299	Serine/threonine-protein phosphatase OS=Apis mellifera OX=7460 GN=mts PE=3 SV=1		0	FALSE	37.442	22	4	12	4	309	35.4	5.53		2.74				2.42					8.63	13.75					8.19					1				1					4	4
FALSE	High	Master Protein	A0A1Q4P6F1	Serine-type D-Ala-D-Ala carboxypeptidase OS=Serratia marcescens OX=615 GN=BHU62_01415 PE=3 SV=1		0.004	FALSE	2.873	3	1	1	1	401	43.7	8.92																				2.14
FALSE	High	Master Protein	A0A088AS87	SERPIN domain-containing protein OS=Apis mellifera OX=7460 GN=100577408 PE=3 SV=1		0	FALSE	8.076	4	2	5	2	640	73.1	9.33		3.54				3.09	3.55		0			3.33										1				1	1		1			1
FALSE	High	Master Protein	A0A088ASF2	SERPIN domain-containing protein OS=Apis mellifera OX=7460 GN=serpin-5 PE=3 SV=1		0	FALSE	47.057	30	11	50	11	451	50.7	7.96	8.28	9.88	5.41	2.93	8.13	3.93	3.1		9.54		2.04	12.84	6.86	6.64		2.21	3.62	3.04	2.77		3	4	4	2	5	3	1		5		1	4	3	2
FALSE	High	Master Protein	A0A088ABM1	SERPIN domain-containing protein OS=Apis mellifera OX=7460 PE=3 SV=1		0	FALSE	25.74	20	5	35	5	342	38.6	6.43	8.22				0	2.85			1.77		15.23	16.1	5.66	4.98		1.74	3.53	9.79	4.2		3				1	2			2		5	5	2	3
FALSE	High	Master Protein	A0A1C3HCS0	Serralysin OS=Serratia marcescens OX=615 GN=prtA PE=4 SV=1		0	FALSE	16.012	10	3	4	3	472	50.3	4.78																				14.08
FALSE	High	Master Protein	P23694	Serralysin OS=Serratia marcescens OX=615 PE=1 SV=1		0	FALSE	50.716	27	9	22	8	487	52.1	4.82																				63.21
FALSE	High	Master Protein	A0A088AD78	SET domain-containing protein OS=Apis mellifera OX=7460 GN=LOC412862 PE=4 SV=1		0	FALSE	12.877	8	3	4	3	513	57.8	6.37			0							4.02		3.69					2.87						1							1		1
FALSE	High	Master Protein	A0A087ZSJ2	SGL domain-containing protein OS=Apis mellifera OX=7460 PE=4 SV=1		0	FALSE	18.758	12	3	6	3	313	34.2	5.48	0										6.44	0				0					1										2	1
FALSE	High	Master Protein	A0A088ALL8	SH3 domain-containing protein OS=Apis mellifera OX=7460 GN=LOC408693 PE=4 SV=1		0	FALSE	127.006	31	20	104	20	878	99.8	6.09	7.16	23.59	5.39	2.31	10.2	5.16	24.49	5.65	6.63		13.29	10.98	9.94	0	2.21	10.58	36.68	50.57	10		3	8	2	3	3	2	9	2	3		5	6	3	1
FALSE	High	Master Protein	A0A088ATA9	SH3 domain-containing protein OS=Apis mellifera OX=7460 PE=4 SV=1		0	FALSE	4.7	5	1	1	1	256	28.1	5.5																			1.98
FALSE	High	Master Protein	A0A088A3R8	SHSP domain-containing protein OS=Apis mellifera OX=7460 GN=724449 PE=3 SV=1		0	FALSE	123.593	62	8	163	8	237	27.7	7.47	59.04	105.73	24.6	8.14	1.66	3.96	86.52	21.49	0	7.44	24.31	38.64	20	12.43		11.32	22.83	19.52	4.19		8	7	6	3	2	1	7	7	1	2	3	6	5	4
FALSE	High	Master Protein	A0A088APK1	SHSP domain-containing protein OS=Apis mellifera OX=7460 GN=LOC408875 PE=3 SV=1		0	FALSE	62.893	54	7	239	7	184	20.5	6.96	44.86	37.87	24.37	19.53	16.32	37.06	28.15	26.57	16.37	6.91	36	34.75	15.76	9.4	10.47	30.68	107.93	56.29	50.28		6	6	4	3	3	6	6	4	3	1	6	6	4	2
FALSE	High	Master Protein	A0A088AE90	SHSP domain-containing protein OS=Apis mellifera OX=7460 GN=LOC410857 PE=3 SV=1		0	FALSE	115.429	75	11	338	11	191	22	6.23	41.05	43.04	113.14	44.29	22.06	39.59	38.32	119.78	29.38	30.03	22.74	31.44	26.39	25.55	8.02	21.66	38.19	26.71	27.38	0	6	6	10	8	6	7	7	11	8	6	5	7	7	8
FALSE	High	Master Protein	A0A088A7Z5	SHSP domain-containing protein OS=Apis mellifera OX=7460 GN=LOC412197 PE=3 SV=1		0	FALSE	125.361	76	14	160	14	174	20.4	6.43	14.67	76.86	35.9	12.58	20.22	14.11	93.1	29.22	15.25	26.35	4.32	34.14	29.25	5.38	2.81		14.05	8.54	1.79		3	10	7	3	4	6	13	7	3	5	1	9	7	2
FALSE	High	Master Protein	A0A088A3R5	SHSP domain-containing protein OS=Apis mellifera OX=7460 GN=LOC724274 PE=3 SV=1		0	FALSE	96.92	66	12	182	12	194	22.5	6.24	16.66	74.63	17.78	0	4.64	17.92	93.51	8.39	2.28	14.02	29.48	82.53	28.25	14.94	0	6.14	15.69	15.66	0		2	9	4	1	1	7	12	4	1	5	6	9	5	5
FALSE	High	Master Protein	A0A088A3R7	SHSP domain-containing protein OS=Apis mellifera OX=7460 GN=LOC724405 PE=3 SV=1		0	FALSE	28.177	31	4	8	4	193	22.4	5.5							3.52					4.98	2.85				7.2										1					2	1
FALSE	High	Master Protein	A0A088A3R9	SHSP domain-containing protein OS=Apis mellifera OX=7460 GN=LOC724488 PE=3 SV=1		0	FALSE	133.472	66	11	174	11	196	23	5.54	13.62	102.43	30.4	0	10.09	28.52	113.32	36.03		45.9	16.84	85.33	24.87	0		1.73	17.36	3.89	0		5	8	6	2	3	5	11	6		6	4	8	5	1
FALSE	High	Master Protein	A0A088A3R2	SHSP domain-containing protein OS=Apis mellifera OX=7460 PE=3 SV=1		0	FALSE	144.492	86	16	175	16	185	21.8	6.55		104.68	85.17			17.21	96.31	60.29	4.67	13.76		8.73	22.67	33.51		2.52	2.27	25.88	2.13			15	13			6	14	10	3	4		2	5	7
FALSE	High	Master Protein	A0A088A3R6	SHSP domain-containing protein OS=Apis mellifera OX=7460 PE=3 SV=1		0	FALSE	23.605	33	4	17	4	209	24.2	5.27		0	15.72				0	6.19														2	4				2	3
FALSE	High	Master Protein	A0A088AGC3	Sidoreflexin OS=Apis mellifera OX=7460 GN=LOC408539 PE=3 SV=1		0	FALSE	23.827	16	3	17	3	321	36.2	9.16	4.82	9.13	4.58		6.19		6.98			0		2.25	7.28						2.1		1	2	1		2		2			1		1	2
FALSE	High	Master Protein	A0A088A4I8	Sidoreflexin OS=Apis mellifera OX=7460 GN=LOC550915 PE=3 SV=1		0	FALSE	121.285	59	16	234	16	326	36.8	9.1	66.06	64.12	63.1	50.36	57.7	46.33	52.56	43.43	49.55	32.65	29.7	37.72	43.44	34.72	15.01	1.88	5.39	7.19	3.75	1.86	12	10	11	9	10	10	9	8	11	7	4	6	9	8
FALSE	High	Master Protein	A0A088A934	Signal peptidase complex catalytic subunit SEC11 OS=Apis mellifera OX=7460 GN=Spase18-21 PE=3 SV=1		0	FALSE	21.076	19	4	40	4	180	20.7	9.13	4.78	8.89	10.8	4.16	9.89	4.56	8.06			2.48	7.91	8.16	8.82		4.49	0	0	5.53	4.18		1	3	3	2	3	2	2			1	3	3	3
FALSE	High	Master Protein	A0A088AR84	Signal recognition particle subunit SRP68 OS=Apis mellifera OX=7460 GN=Srp68 PE=3 SV=1		0	FALSE	21.068	10	3	10	3	576	66.2	8.47	2.39	7.23	0				4.86				5.26								1.6		1	2	1				1				2
FALSE	High	Master Protein	A0A088A4L7	Signal recognition particle subunit SRP72 OS=Apis mellifera OX=7460 PE=3 SV=1		0	FALSE	20.719	10	4	12	4	630	71.4	8.7		5.01					2.19				5.2	0	2.1		0		2.58		2.31			2					1				2	1	1
FALSE	High	Master Protein	A0A088AEX7	Signal transducer and activator of transcription OS=Apis mellifera OX=7460 GN=STAT92E-like PE=3 SV=1		0	FALSE	29.707	13	7	33	7	824	92.8	6.79	6.01	6.79	5.57	2.14	2.65	2.8	4.12	3.15	3.01		15.86	15.79	8.93	2.25			2.24	1.95	1.79		1	1	2	1	1	1	2	2	1		4	4	2	1
FALSE	High	Master Protein	B6V6A0	Silk fibroin 1 OS=Apis mellifera OX=7460 GN=Fibroin1 PE=2 SV=1		0.008	FALSE	2.334	3	1	1	1	333	33.3	6.34															0
FALSE	High	Master Protein	B6V6A2	Silk fibroin 3 OS=Apis mellifera OX=7460 GN=Fibroin3 PE=2 SV=1		0	FALSE	12.159	8	2	3	2	335	33.5	5.88																				10.38
FALSE	High	Master Protein	B6V6A3	Silk fibroin 4 OS=Apis mellifera OX=7460 GN=Fibroin4 PE=2 SV=1		0	FALSE	8.628	5	1	2	1	342	33.9	5.15																				7.79
FALSE	High	Master Protein	A0A1Q4P0U7	Single-stranded DNA-binding protein OS=Serratia marcescens OX=615 GN=BHU62_11030 PE=3 SV=1		0	FALSE	5.452	8	1	3	1	176	18.8	5.58														2.82						6.95														1
FALSE	High	Master Protein	A0A086FDJ7	Site-determining protein OS=Serratia marcescens OX=615 GN=minD_1 PE=3 SV=1		0	FALSE	23.6	25	5	8	5	270	29.6	5.19														5.89	3.99					5.93														3
FALSE	High	Master Protein	A0A088AN14	Skp1_POZ domain-containing protein OS=Apis mellifera OX=7460 GN=Elongin-C PE=3 SV=1		0	FALSE	4.311	14	2	3	2	145	16	4.51												0					0		0													1
FALSE	High	Master Protein	A0A087ZW80	Sm domain-containing protein OS=Apis mellifera OX=7460 GN=Lsm7 PE=4 SV=1		0	FALSE	4.747	16	1	1	1	113	12.7	7.14												2.03																				1
FALSE	High	Master Protein	A0A093SD47	Small heat shock protein IbpB OS=Pectobacterium carotovorum subsp. carotovorum OX=555 GN=ibpB PE=3 SV=1		0	FALSE	5.435	12	2	4	2	150	16.8	5.5									2.13					6.03															1					2
FALSE	High	Master Protein	A0A088AF01	Small nuclear ribonucleoprotein G OS=Apis mellifera OX=7460 GN=SmG PE=3 SV=1		0.002	FALSE	3.535	21	2	6	2	76	8.6	8.78			1.81			1.83					4.16	2.16						0					1			1					2	1
FALSE	High	Master Protein	A0A088A041	Small nuclear ribonucleoprotein Sm D1 OS=Apis mellifera OX=7460 GN=LOC552559 PE=3 SV=1		0	FALSE	12.243	16	1	29	1	123	13.6	11.44	0	4.59	0		0	0	1.83	1.74		1.95	0	2.14	2.03								1	1	1		1	1	1	1		1	1	1	1
FALSE	High	Master Protein	A0A087ZMS5	Small nuclear ribonucleoprotein Sm D2 OS=Apis mellifera OX=7460 PE=3 SV=1		0	FALSE	16.164	43	4	16	4	110	12.5	9.99		3.32			0	1.72	1.72			2.12	2.01	4.29	1.91				8.85	1.9	1.75			1			1	1	1			1	1	3	1
FALSE	High	Master Protein	A0A087ZNX7	Small nuclear ribonucleoprotein Sm D3 OS=Apis mellifera OX=7460 GN=SmD3 PE=3 SV=1		0	FALSE	17.137	30	3	16	3	142	15.4	10.32		5.88				1.87		1.92			7.2	7.59	3.34	1.78	0		7.24					2				1		1			2	2	1	1
FALSE	High	Master Protein	A0A088A2F9	Small nuclear ribonucleoprotein-associated protein OS=Apis mellifera OX=7460 GN=Smb PE=3 SV=1		0	FALSE	3.976	4	1	18	1	217	22.7	11.08	5.01	4.92	2.61	2.25	2.5	4.42	2.55	2.09	2.47		4.25	4.19	2.32	0							1	1	1	1	1	1	1	1	1		1	1	1	1
FALSE	High	Master Protein	A0A088ACK1	Small ubiquitin-related modifier OS=Apis mellifera OX=7460 GN=LOC409308 PE=3 SV=1		0	FALSE	5.943	12	1	4	1	98	11.2	5.1	2.33											3.06	0						2.09		1											1	1
FALSE	High	Master Protein	H9KID5	Small ubiquitin-related modifier OS=Apis mellifera OX=7460 GN=smt3 PE=3 SV=1		0	FALSE	6.805	19	2	5	2	93	10.4	5.48	1.7										2.78	2.14	0	0							1										1	1	1	1
FALSE	High	Master Protein	A0A1C3HIT4	Small-conductance mechanosensitive channel OS=Serratia marcescens OX=615 GN=mscS PE=4 SV=1		0	FALSE	14.392	16	3	3	3	288	31	9.09																				10
FALSE	High	Master Protein	A0A087ZZ04	SMB domain-containing protein OS=Apis mellifera OX=7460 GN=LOC409789 PE=3 SV=1		0	FALSE	252.126	68	27	1011	27	439	50.2	7.31	128.52	120.71	167.67	190.9	160.4	107.16	133.44	127.39	152.12	142.1	88.7	96.42	123.72	185.19	119.35	72.37	113.95	121.1	60.64	87.99	20	20	21	25	22	16	17	18	20	20	15	17	20	20
FALSE	High	Master Protein	A0A088A605	S-methyl-5'-thioadenosine phosphorylase OS=Apis mellifera OX=7460 GN=LOC552740 PE=3 SV=1		0	FALSE	10.03	13	2	4	2	285	31.5	7.2											4.9	6.98																			2	2
FALSE	High	Master Protein	A0A088A0G6	SMK-1 domain-containing protein OS=Apis mellifera OX=7460 GN=flfl PE=4 SV=1		0	FALSE	5.615	2	1	3	1	812	92.7	4.94	1.87	1.85									2.43										1	1									1
FALSE	High	Master Protein	A0A087ZPA7	Sodium/hydrogen exchanger OS=Apis mellifera OX=7460 PE=3 SV=1		0	FALSE	4.011	2	1	3	1	678	75.8	6.71	0	0										2.09									1	1										1
FALSE	High	Master Protein	A0A087ZTA6	Sodium/potassium-transporting ATPase subunit alpha OS=Apis mellifera OX=7460 PE=3 SV=1		0	FALSE	865.264	59	62	4139	62	1035	115.2	5.81	971.62	746.77	563.26	478.82	619.68	546.5	820.82	556.71	323.65	413.34	542.08	590.88	592.97	360.7	388.78	758.55	1599.85	1152.21	138.03	151.07	58	54	48	48	50	49	58	56	47	46	51	54	50	42
FALSE	High	Master Protein	A0A088AHC0	Solute carrier organic anion transporter family member OS=Apis mellifera OX=7460 GN=LOC409650 PE=3 SV=1		0	FALSE	31.416	10	5	19	5	717	79.4	8.16			13.33					19.31	15					11.96									3					4	3					3
FALSE	High	Master Protein	A0A088ATA4	Sorting nexin OS=Apis mellifera OX=7460 PE=3 SV=1		0	FALSE	4.385	4	2	6	2	404	46.8	6.14						0					0	2.57	2.15													1					2	2	1
FALSE	High	Master Protein	A0A088ALU3	Spaetzle domain-containing protein OS=Apis mellifera OX=7460 PE=4 SV=1		0	FALSE	39.718	25	7	112	7	323	36.8	8.51	1.61	10.93	12.19	23.18	19.98	3.64	16.38	18.98	21.34	9.72	1.95	8.44	9.23	27.23	14.82	4.58	3.78	8.93	1.8	2.02	2	4	5	5	5	2	4	6	6	2	1	3	2	4
FALSE	High	Master Protein	A0A087ZWQ6	SPARC_Ca_bdg domain-containing protein OS=Apis mellifera OX=7460 GN=BM-40-SPARC PE=4 SV=1		0	FALSE	5.607	6	2	4	2	304	35.3	5.25										2.38		0						0												1		2
FALSE	High	Master Protein	A0A088ANZ7	Spectrin beta chain OS=Apis mellifera OX=7460 GN=beta-Spec PE=3 SV=1		0	FALSE	1667.01	68	137	3314	136	2401	277.6	5.71	820.94	861.18	525.26	515.89	439.64	408.48	966.28	452.14	349.85	216.6	661.54	583.56	664.2	162.58	219.67	333.79	889.57	601.07	371.07	14.45	114	114	86	94	80	83	116	83	76	48	96	88	98	49
FALSE	High	Master Protein	A0A088A9Y5	Sphingomyelin phosphodiesterase OS=Apis mellifera OX=7460 GN=727146 PE=3 SV=1		0	FALSE	5.029	3	2	5	2	699	80.2	6.49							0	0		0				0													1	1		1				2
FALSE	High	Master Protein	A1Z1R8	S-ribosylhomocysteine lyase OS=Serratia marcescens OX=615 GN=luxS PE=3 SV=1		0	FALSE	19.12	35	5	6	5	171	19.3	6.04					0				3.1											8.65					1				1
FALSE	High	Master Protein	A0A088AP45	SRP54 domain-containing protein OS=Apis mellifera OX=7460 GN=Gtp-bp PE=4 SV=1		0	FALSE	14.117	8	3	8	3	614	69.3	8.5		2.05					3.04				2.02		3.27				2.69	0				1					2				1		1
FALSE	High	Master Protein	A0A088ANW3	SSD domain-containing protein OS=Apis mellifera OX=7460 GN=LOC408992 PE=4 SV=1		0	FALSE	63.759	13	13	25	13	1240	140.9	6.21						5.61							32.1		6.38					3.65						3							11
FALSE	High	Master Protein	A0A087ZWG1	SSD domain-containing protein OS=Apis mellifera OX=7460 PE=4 SV=1		0	FALSE	14.17	4	6	11	6	1442	161.6	6.89		3.35					1.61	3.64		3.74		2.4			0		5.96					3					2	1		1		1
FALSE	High	Master Protein	Q54483	SSP-h1 OS=Serratia marcescens OX=615 PE=4 SV=2		0	FALSE	42.693	11	6	8	1	1036	107.5	5.22																				29.69
FALSE	High	Master Protein	A0A087ZQD4	Staphylococcal nuclease domain-containing protein OS=Apis mellifera OX=7460 GN=Tudor-SN PE=4 SV=1		0	FALSE	145.801	31	22	70	22	892	100.9	7.96	9.89	2.63	2.72			8.07	2.21			5.01	26.82	5.15	10.01	5.05	1.68	9.13	13.2	5.4	47.17		4	1	1			4	1			2	8	2	4	3
FALSE	High	Master Protein	A0A087ZRM4	STI1 domain-containing protein OS=Apis mellifera OX=7460 PE=4 SV=1		0	FALSE	21.88	30	3	12	3	151	16.9	8.28											9.01	7.87				0	2.35		0												3	2
FALSE	High	Master Protein	A0A087ZTD1	Str_synth domain-containing protein OS=Apis mellifera OX=7460 PE=4 SV=1		0	FALSE	38.736	23	10	135	10	564	63.1	9.09	25.1	37.88	17.99	6.61	17.42	8.19	20.62	4.3	3.84	14.09	20.84	13.62	23.13	5.94	8.41	7.33	20.54	12.6	13.73		8	8	5	3	5	4	7	2	2	4	6	4	5	4
FALSE	High	Master Protein	A0A0G3SNK6	Streptogramin lyase OS=Serratia marcescens OX=615 GN=yncE_2 PE=4 SV=1		0	FALSE	22.16	18	4	5	4	354	38.3	9.09																				16.64
FALSE	High	Master Protein	V5YUY6	Stringent starvation protein A OS=Serratia marcescens OX=615 GN=sspA PE=3 SV=1		0	FALSE	5.596	5	1	2	1	242	27.7	4.93																				6.41
FALSE	High	Master Protein	A5A5E4	Structural cuticle protein (Fragment) OS=Apis mellifera OX=7460 PE=2 SV=1		0	FALSE	105.96	43	3	1410	3	138	14.6	4.41	168.16	127.83	160.44	218.48	187.58	144.83	118.2	123.61	186.23	141.84	121.57	88.91	187.38	102.56	137.98	347.35	739.32	1023.62	922.45	63.27	1	2	2	2	2	2	1	1	2	2	1	1	1	1
FALSE	High	Master Protein	A0A088AHL5	Structural maintenance of chromosomes protein OS=Apis mellifera OX=7460 GN=Cap PE=3 SV=1		0.002	FALSE	3.148	1	1	2	1	1202	139.4	8.27																	0	0
FALSE	High	Master Protein	A0A087ZYL5	Structural maintenance of chromosomes protein OS=Apis mellifera OX=7460 GN=SMC1 PE=3 SV=1		0	FALSE	5.071	1	1	6	1	1230	141.3	6.65	2.33	2					1.97				2.09	2.17	2.14								1	1					1				1	1	1
FALSE	High	Master Protein	A0A088A3W0	Succinate dehydrogenase [ubiquinone] cytochrome b small subunit OS=Apis mellifera OX=7460 GN=LOC725566 PE=3 SV=1		0	FALSE	12.847	16	4	92	4	201	22.3	9.32	10.05	13.02	7.16	3.33	9.25	0	11.53	9.74	1.65	5.06	1.3	5.27	3.78	1.49		0	7.55	3.57	0	0	4	4	4	2	4	1	4	3	2	2	4	4	4	3
FALSE	High	Master Protein	A0A088A6T3	Succinate dehydrogenase [ubiquinone] flavoprotein subunit, mitochondrial OS=Apis mellifera OX=7460 GN=LOC408734 PE=3 SV=1		0	FALSE	8.503	3	2	15	1	663	74.4	7.25	4.21	6.29	2.11	1.53			2.62	1.56		1.77		3.54									1	2	1	1			1	1		1		2
FALSE	High	Master Protein	A0A088A6T4	Succinate dehydrogenase [ubiquinone] flavoprotein subunit, mitochondrial OS=Apis mellifera OX=7460 GN=SdhA PE=3 SV=1		0	FALSE	375.755	59	27	742	26	661	72.4	7.18	260.55	205.34	112.42	111.67	119	112.5	223.95	162.06	86.87	74.69	181.63	208.29	162.9	51.87	32.9	81.24	173.91	93.61	42.76		24	22	15	19	20	18	23	20	16	14	20	23	20	10
FALSE	High	Master Protein	A0A088AQ13	Succinate dehydrogenase [ubiquinone] iron-sulfur subunit, mitochondrial OS=Apis mellifera OX=7460 GN=LOC551169 PE=3 SV=1		0	FALSE	128.349	61	14	523	14	254	29	8.78	85.17	73.09	55.89	53.86	66.88	53.14	81.53	68.69	51.26	56.24	72.47	77.49	66.65	30.86	31.99	44.47	154.47	83.9	26.67	2.1	12	12	10	11	10	10	12	10	11	10	12	12	11	8
FALSE	High	Master Protein	A0A0F6KX73	Succinate dehydrogenase flavoprotein subunit OS=Serratia marcescens OX=615 GN=sdhA PE=3 SV=1		0	FALSE	41.919	19	7	22	7	588	64.4	6.18					2.97				8.59	3.91				22.41	7.57					18.8					1				3	1				5
FALSE	High	Master Protein	A0A086FM45	Succinate dehydrogenase hydrophobic membrane anchor subunit OS=Serratia marcescens OX=615 GN=sdhD PE=4 SV=1		0.001	FALSE	3.744	9	1	1	1	115	12.9	9.19																				2.98
FALSE	High	Master Protein	A0A093V9L8	Succinate dehydrogenase iron-sulfur subunit OS=Pectobacterium carotovorum subsp. carotovorum OX=555 GN=sdhB PE=3 SV=1		0	FALSE	20.92	21	4	8	2	238	26.7	7.21														4.9	3.21					13.02														2
FALSE	High	Master Protein	A0A1Q4P2C7	Succinate dehydrogenase iron-sulfur subunit OS=Serratia marcescens OX=615 GN=BHU62_07150 PE=3 SV=1		0.004	FALSE	2.932	5	1	1	1	244	27.3	6.52																				2.38
FALSE	High	Master Protein	A0A0G8BBT0	Succinate dehydrogenase iron-sulfur subunit OS=Serratia marcescens OX=615 GN=sdhB PE=3 SV=1		0	FALSE	22.647	22	4	10	2	238	26.7	6.54														5.66	3.21					22.98														1
FALSE	High	Master Protein	A0A088ADV3	Succinate--CoA ligase [ADP/GDP-forming] subunit alpha, mitochondrial OS=Apis mellifera OX=7460 GN=Scsalpha PE=3 SV=1		0	FALSE	164.437	48	13	293	13	340	36	9	102.21	27.02	24.64	2.75	2.38	52.77	55.37	62.85	17.37	7.91	98.53	69.37	38.6	26.46		51.81	64.54	16.61	30.88		11	6	6	1	1	10	10	9	6	3	11	9	8	6
FALSE	High	Master Protein	A0A080UXF7	Succinate--CoA ligase [ADP-forming] subunit alpha OS=Serratia marcescens OX=615 GN=sucD PE=3 SV=1		0	FALSE	75.463	62	12	76	12	290	29.8	7.08					13.49	2.12			7.35					14.97	16.51					121					4	1			4					4
FALSE	High	Master Protein	A0A093SPU8	Succinate--CoA ligase [ADP-forming] subunit beta OS=Pectobacterium carotovorum subsp. carotovorum OX=555 GN=sucC PE=3 SV=1		0	FALSE	36.787	32	10	25	3	388	41.2	5.62					4.15				10.32					16.38	10.38					9.92					3				4					7
FALSE	High	Master Protein	A0A086FM50	Succinate--CoA ligase [ADP-forming] subunit beta OS=Serratia marcescens OX=615 GN=sucC PE=3 SV=1		0	FALSE	69.019	44	14	51	7	388	41.4	5.34					13.3	2.35			14.77	4.93	2.65			15.43	16.24					71.01					4	1			4	1	1			5
FALSE	High	Master Protein	A0A088ARY0	Succinate--CoA ligase [ADP-forming] subunit beta, mitochondrial OS=Apis mellifera OX=7460 PE=3 SV=1		0	FALSE	164.61	52	16	312	16	448	48.6	7.33	109.11	52.97	58.29	1.63	13.24	30.42	46.27	47.98	4.23	38.86	84.93	69.92	42.2	31.81		46.33	82.16	57.78	39.81		14	9	11	1	5	10	9	10	3	8	13	11	11	10
FALSE	High	Master Protein	A0A221FRY6	Succinate-semialdehyde dehydrogenase I OS=Serratia marcescens OX=615 GN=BVG93_12765 PE=3 SV=1		0	FALSE	44.35	22	8	11	8	491	52	6.46																				33.47
FALSE	High	Master Protein	V5T6X6	Succinate-semialdehyde dehydrogenase OS=Bifidobacterium sp. Hma3N OX=1293831 PE=3 SV=1		0	FALSE	32.399	24	6	10	6	457	49.6	4.91			22.62					2.28															5					1
FALSE	High	Master Protein	V5T8Z2	Succinate-semialdehyde dehydrogenase OS=Lactobacillus mellis OX=1218508 GN=JG29_13450 PE=3 SV=1		0	FALSE	11.988	9	3	4	3	454	49.6	5.03								14.06																				3
FALSE	High	Master Protein	A0A087ZSQ3	Succinyl-CoA:3-ketoacid-coenzyme A transferase OS=Apis mellifera OX=7460 GN=LOC409157 PE=3 SV=1		0	FALSE	72.66	42	12	54	12	541	58.9	5.57	34.81	2.39	2.76			5.49		6.44			19.5	12.34		8.33		9.53	11.75	13.02	5.44		9	1	2			3		2			5	4		3
FALSE	High	Master Protein	A0A221FQA6	Sugar ABC transporter substrate-binding protein OS=Serratia marcescens OX=615 GN=BVG93_10750 PE=4 SV=1		0	FALSE	19.613	17	3	3	3	335	36	6																				10.37
FALSE	High	Master Protein	A0A087ZZX7	Sulfatase domain-containing protein OS=Apis mellifera OX=7460 PE=4 SV=1		0	FALSE	20.927	12	5	12	5	528	60.1	7.84			3.86	15.41	3.46				0	5.98								0					1	5	1				1	2
FALSE	High	Master Protein	A0A088ARE4	SUMO-activating enzyme subunit OS=Apis mellifera OX=7460 GN=Uba2 PE=3 SV=1		0	FALSE	8.709	5	3	3	3	666	74.1	5.76																1.66		0	1.6
FALSE	High	Master Protein	A0A088A700	SUN domain-containing protein OS=Apis mellifera OX=7460 PE=4 SV=1		0	FALSE	9.789	7	3	8	3	737	86.7	8.29	2.29	2.4	2.14				4.3	2.28					3.18								1	1	1				3	1					1
FALSE	High	Master Protein	Q7YXM6	Superoxide dismutase [Cu-Zn] OS=Apis mellifera ligustica OX=7469 GN=Sod1 PE=2 SV=1		0	FALSE	80.28	80	8	102	8	152	15.6	6.71	9.49	19.17	13.43		2.56	15.14	2.39	7.68	2.35	15.49	38.47	41.53	12.14	4.06		0	35.76	20.29	15		4	5	4		2	4	1	2	1	5	6	7	3	2
FALSE	High	Master Protein	A0A088A1K0	Superoxide dismutase OS=Apis mellifera OX=7460 GN=Sod2 PE=3 SV=1		0	FALSE	118.195	51	11	258	11	218	24.5	9.04	53.35	30.46	35.82	8.98	19.44	60.33	44.07	41.66	12.88	22.55	59.81	70.01	28.18	12.82		19.32	119.4	87.69	63.44		7	6	6	3	3	7	5	5	3	5	7	7	5	3
FALSE	High	Master Protein	A0A093T2T4	Superoxide dismutase OS=Pectobacterium carotovorum subsp. carotovorum OX=555 GN=KP17_07155 PE=3 SV=1		0	FALSE	7.041	10	2	13	1	208	22.9	6.34	0			3.41	1.87	1.71			5.44					6.8	0						1			1	1	1			1					2
FALSE	High	Master Protein	A0A080UXN9	Superoxide dismutase OS=Serratia marcescens OX=615 GN=sodA PE=3 SV=1		0	FALSE	43.64	51	7	27	6	206	23.3	6.74	0			3.41	1.87	1.71			7.26					5.1	0		1.9			37.25	1			1	1	1			2					1
FALSE	High	Master Protein	A0A1C3HD24	Superoxide dismutase OS=Serratia marcescens OX=615 GN=sodB PE=3 SV=1		0.002	FALSE	3.28	8	1	1	1	140	15.6	7.2														0																				1
FALSE	High	Master Protein	A0A088A2C3	SURF1-like protein OS=Apis mellifera OX=7460 GN=Surf1 PE=3 SV=1		0	FALSE	10.496	7	2	2	2	307	36.2	9.76	3.18																		2.22		1
FALSE	High	Master Protein	V5T7A2	Surface layer protein OS=Lactobacillus helsingborgensis OX=1218494 GN=JF73_14730 PE=4 SV=1		0	FALSE	76.04	18	11	61	6	593	61.9	9.19			31.07	0	4.81				13.8	5.33				7.93	18.72			10.44	2.72	40.58			6	1	3				5	2				2
FALSE	High	Master Protein	V5T8V6	Surface layer protein OS=Lactobacillus kimbladii OX=1218506 GN=JF75_16750 PE=4 SV=1		0	FALSE	187.261	39	18	119	14	603	63.1	9.36	41.09		160.05						16.5	4.57	6.39			7.64	11.17			53.33	2.72	23.23	8		16						4	3	3			4
FALSE	High	Master Protein	V5T8R4	Surface layer protein OS=Lactobacillus sp. Hma11N OX=1218505 PE=4 SV=1		0	FALSE	51.188	12	6	37	5	577	60	9.48			6.68	0	14.37			15.6	10.88		3.16							0		22.66			1	1	3			3	3		1
FALSE	High	Master Protein	A0A088AFD4	SWIB domain-containing protein OS=Apis mellifera OX=7460 GN=LOC408520 PE=4 SV=1		0	FALSE	78.725	49	10	178	10	261	29.2	7.83	36.91	31.11	20.53	13.33	16.43	16.29	17.5	19.14	14.69	19.61	36.45	30.61	27.89	26.72	23.48	36.96	20.33	20.81	19.71		7	6	4	2	3	6	4	5	3	4	5	6	6	6
FALSE	High	Master Protein	A0A088A062	Synaptosomal-associated protein OS=Apis mellifera OX=7460 PE=3 SV=1		0	FALSE	35.944	36	4	19	4	162	18.1	4.89	3.49	3.19	3.35			8.46										0	10.15	7.45	12.51		1	1	1			4
FALSE	High	Master Protein	A0A088ARZ3	Syndecan OS=Apis mellifera OX=7460 PE=3 SV=1		0	FALSE	12.474	15	2	4	2	212	23.3	4.58											4.67						3.01	2.52													1
FALSE	High	Master Protein	A0A088AV88	SynN domain-containing protein OS=Apis mellifera OX=7460 GN=LOC725758 PE=4 SV=1		0.004	FALSE	2.69	7	1	1	1	258	29.8	8.24							2.82																				1
FALSE	High	Master Protein	A0A087ZVJ2	TACC_C domain-containing protein OS=Apis mellifera OX=7460 PE=4 SV=1		0	FALSE	11.037	3	3	4	3	948	106.5	4.63	0											1.76					5.67				1											1
FALSE	High	Master Protein	A0A088A0K5	Tafazzin family protein OS=Apis mellifera OX=7460 PE=3 SV=1		0.001	FALSE	3.871	7	1	1	1	284	33	9.47		2.44																				1
FALSE	High	Master Protein	A0A221H7T1	Tail-specific protease OS=Serratia marcescens OX=615 GN=BVG84_07185 PE=3 SV=1		0	FALSE	4.448	3	2	2	2	682	76.3	8.03																				4.88
FALSE	High	Master Protein	Q5XUU6	Take-out-like carrier protein JHBP-1 OS=Apis mellifera OX=7460 PE=2 SV=1		0	FALSE	26.054	21	5	21	5	253	29.2	8.32	4.68		6.12	4.18		7.26			5.66					2.6	1.75	0			5.02		2		2	2		3			3					3
FALSE	High	Master Protein	A0A088AVZ9	T-complex protein 1 subunit alpha OS=Apis mellifera OX=7460 GN=LOC409134 PE=3 SV=1		0	FALSE	102.36	33	16	121	16	557	59.9	5.91	31.22	28.59	13.1		0	8.25	15.32	6.27	2.42	6.43	54.91	31.89	15.76	17.27	0	12.96	27.18	4.78	13.3		8	7	3		1	4	3	3	1	2	12	7	6	9
FALSE	High	Master Protein	A0A088AHM7	T-complex protein 1 subunit delta OS=Apis mellifera OX=7460 GN=LOC551275 PE=3 SV=1		0	FALSE	107.455	47	17	142	17	534	57.3	7.42	46.91	30.02	6.29	2.05	5.35	12.7	27.04	12.54	0	21.16	45.51	44.2	21.26	16.29	0	4.32	15.17	5.98	7.04		13	7	2	1	4	6	6	3	1	4	11	11	6	6
FALSE	High	Master Protein	A0A087ZUG4	T-complex protein 1 subunit eta OS=Apis mellifera OX=7460 GN=Tcp-1eta PE=3 SV=1		0	FALSE	101.825	40	16	91	16	542	59.9	6.42	14.72	20.22	3.35			2.28	9.67	0		1.68	29.67	37.62	14.7	0		11.94	16.15	2.25	14.97		4	4	2			1	3	1		2	8	9	4	2
FALSE	High	Master Protein	A0A088A3C0	T-complex protein 1 subunit gamma OS=Apis mellifera OX=7460 GN=Cctgamma PE=3 SV=1		0	FALSE	99.683	46	18	98	18	550	61	6.57	16.19	21.72	6.71	2.68		11.58	14.63	2.92	3	9.11	26.5	25.04	20.83	14.59	2.45	19.7	17.29	5.67	19.53		5	6	3	1		5	5	1	1	3	9	8	7	3
FALSE	High	Master Protein	A0A087ZVC8	TCTP domain-containing protein OS=Apis mellifera OX=7460 GN=Tctp PE=3 SV=1		0	FALSE	20.233	34	5	31	5	172	19.8	4.7	0	0				4.8					18.25	10.54	1.68	1.62		1.96	6.87	1.88	3.9		1	1				2					5	3	1	1
FALSE	High	Master Protein	A0A088AV46	Tetraspanin OS=Apis mellifera OX=7460 GN=102656585 PE=3 SV=1		0	FALSE	12.948	11	3	16	3	264	29.3	7.33		1.9	0		2.05					4.82					2.04	3.83	5.75	6.9	2.45	2.45		1	1		1					2
FALSE	High	Master Protein	A0A088AUK0	Tetraspanin OS=Apis mellifera OX=7460 GN=Tspan1 PE=3 SV=1		0	FALSE	8.476	14	3	10	3	257	29.3	7.72	5.2	5.59			2.42		4.72						0	0	0						1	2			1		2						1	1
FALSE	High	Master Protein	A0A088AUG1	Tetraspanin OS=Apis mellifera OX=7460 GN=Tspan13 PE=3 SV=1		0	FALSE	17.763	16	4	43	4	238	26.2	7.72	0	0	0	0	2.03	2.29	4.64	0	0	0	0	0	4.16	0	0	2.1	5.89	4.04	1.85		1	1	1	1	1	1	2	1	1	1	1	1	2	1
FALSE	High	Master Protein	A0A088A8X8	Tetraspanin OS=Apis mellifera OX=7460 GN=Tspan3 PE=3 SV=1		0	FALSE	7.94	15	2	9	2	241	27.3	7.08			0			0		2.26	0					1.77	1.73								1			1		1	2					1
FALSE	High	Master Protein	A0A088ASL1	Tetraspanin OS=Apis mellifera OX=7460 GN=Tspan9 PE=3 SV=1		0	FALSE	13.964	19	2	7	2	267	28.5	5.05		7.56	5.1		4.67						4.46		4.06		0							2	1		1						1		1
FALSE	High	Master Protein	Q9NB07	Tetraspanin OS=Apis mellifera OX=7460 PE=2 SV=1		0	FALSE	12.949	10	3	76	3	232	25.3	6.7	9.4	8.19	10.39	1.69	7.06	5.22	6.54	1.77	1.82	4.47	3.64	9.97	9.23	6.48	7.8	1.67	5.69	5.04	3.72	13.64	3	3	2	1	2	1	2	1	1	1	1	2	2	2
FALSE	High	Master Protein	A0A088AJI0	TFCD_C domain-containing protein OS=Apis mellifera OX=7460 PE=4 SV=1		0	FALSE	4.787	2	1	1	1	1130	128.8	6.29	2.74																				1
FALSE	High	Master Protein	A0A088AKR6	TGc domain-containing protein OS=Apis mellifera OX=7460 GN=LOC409425 PE=4 SV=1		0	FALSE	102.811	28	13	68	13	713	80.6	5.01		11.59	14.42	2.02	6.71	2.45	15.21	2.33			7.23	15.06	16.5	1.73		7.05	32.44	37.76	18.37			3	4	1	2	2	4	1			3	5	4	2
FALSE	High	Master Protein	A0A087ZQT4	TGS domain-containing protein OS=Apis mellifera OX=7460 GN=100576663 PE=4 SV=1		0	FALSE	29.262	28	8	21	8	329	37.5	8.66	0	2.32					2.56	2.06			4.7	0	0			2.55	4.25	0			1	1					2	3			4	1	2
FALSE	High	Master Protein	A0A088AGN1	ThiF domain-containing protein OS=Apis mellifera OX=7460 PE=4 SV=1		0	FALSE	6.018	12	1	5	1	130	14.2	4.94	2.2										3.95	1.68	0								1										1	1	1
FALSE	High	Master Protein	A0A0M4QS53	Thiol:disulfide interchange protein OS=Serratia marcescens OX=615 GN=dsbA_3 PE=3 SV=1		0	FALSE	4.24	5	1	2	1	207	22.9	6.79																				5.89
FALSE	High	Master Protein	R0MFT8	Thioredoxin (Fragment) OS=Nosema bombycis (strain CQ1 / CVCC 102059) OX=578461 GN=THIO PE=4 SV=1		0.004	FALSE	2.687	10	1	3	1	90	9.7	5.39					2.19					2.03					1.72										1					1
FALSE	High	Master Protein	A0A087ZSW3	Thioredoxin domain-containing protein OS=Apis mellifera OX=7460 GN=726314 PE=4 SV=1		0	FALSE	15.465	17	5	27	5	285	33.1	8.63	3.79	2.28	4.49	2.04	6.34	2.22	5.16	2	2.1	2.67		2.62	2.61	4.29	0	1.8	2.64	5.17	2.09		2	1	2	1	3	1	2	1	1	1		1	1	2
[truncated: 1,397 more rows]
[truncated: 37 more columns]
